# Supplementary material
Source: publisher figshare collection journal article supplement (https://acs.figshare.com/ndownloader/files/7573696)
Supplement: Supplementary file 1 [file 7573696]

 
data_3_In_Br
 
_audit_creation_method            SHELXL-2014
_chemical_name_systematic
;
 ?
;
_chemical_name_common             ?
_chemical_melting_point           ?
_chemical_formula_moiety          C25H31Br2In1N2O2
_chemical_formula_sum
 'C25 H31 Br2 In N2 O2' 
_chemical_formula_weight          666.16

loop_
 _atom_type_symbol
 _atom_type_description
 _atom_type_scat_dispersion_real
 _atom_type_scat_dispersion_imag
 _atom_type_scat_source
 'C'  'C'   0.0033   0.0016
 'International Tables Vol C Tables 4.2.6.8 and 6.1.1.4'
 'H'  'H'   0.0000   0.0000
 'International Tables Vol C Tables 4.2.6.8 and 6.1.1.4'
 'N'  'N'   0.0061   0.0033
 'International Tables Vol C Tables 4.2.6.8 and 6.1.1.4'
 'O'  'O'   0.0106   0.0060
 'International Tables Vol C Tables 4.2.6.8 and 6.1.1.4'
 'Br'  'Br'  -0.2901   2.4595
 'International Tables Vol C Tables 4.2.6.8 and 6.1.1.4'
 'In'  'In'  -0.7276   1.3100
 'International Tables Vol C Tables 4.2.6.8 and 6.1.1.4'
 
_space_group_crystal_system       trigonal
_space_group_IT_number            148
_space_group_name_H-M_alt         'R -3 :H'
_space_group_name_Hall            '-R 3'
 
_shelx_space_group_comment
;
The symmetry employed for this shelxl refinement is uniquely defined
by the following loop, which should always be used as a source of
symmetry information in preference to the above space-group names.
They are only intended as comments.
;
 
loop_
 _space_group_symop_operation_xyz
 'x, y, z'
 '-y, x-y, z'
 '-x+y, -x, z'
 'x+2/3, y+1/3, z+1/3'
 '-y+2/3, x-y+1/3, z+1/3'
 '-x+y+2/3, -x+1/3, z+1/3'
 'x+1/3, y+2/3, z+2/3'
 '-y+1/3, x-y+2/3, z+2/3'
 '-x+y+1/3, -x+2/3, z+2/3'
 '-x, -y, -z'
 'y, -x+y, -z'
 'x-y, x, -z'
 '-x+2/3, -y+1/3, -z+1/3'
 'y+2/3, -x+y+1/3, -z+1/3'
 'x-y+2/3, x+1/3, -z+1/3'
 '-x+1/3, -y+2/3, -z+2/3'
 'y+1/3, -x+y+2/3, -z+2/3'
 'x-y+1/3, x+2/3, -z+2/3'
 
_cell_length_a                    40.4131(5)
_cell_length_b                    40.4131(5)
_cell_length_c                    9.8061(2)
_cell_angle_alpha                 90
_cell_angle_beta                  90
_cell_angle_gamma                 120
_cell_volume                      13869.8(5)
_cell_formula_units_Z             18
_cell_measurement_temperature     100(2)
_cell_measurement_reflns_used      9998
_cell_measurement_theta_min        2.16
_cell_measurement_theta_max       25.30 
 
_exptl_crystal_description        block 
_exptl_crystal_colour             yellow 
_exptl_crystal_density_meas       ? 
_exptl_crystal_density_method     ?              
_exptl_crystal_density_diffrn     1.436          
_exptl_crystal_F_000              5940
_exptl_transmission_factor_min    ?                                             
_exptl_transmission_factor_max    ?                                             
_exptl_crystal_size_max           0.4 
_exptl_crystal_size_mid           0.3
_exptl_crystal_size_min           0.2 
_exptl_absorpt_coefficient_mu     3.380
_shelx_estimated_absorpt_T_min    ? 
_shelx_estimated_absorpt_T_max    ? 
_exptl_absorpt_correction_type    'multi-scan' 
_exptl_absorpt_correction_T_min   0.308
_exptl_absorpt_correction_T_max   0.509
_exptl_absorpt_process_details    'SADABS' 
 
_exptl_special_details
;
 ?
;
 
_diffrn_ambient_temperature       100(2)
_diffrn_radiation_wavelength      0.71073
_diffrn_radiation_type            MoK\a
_diffrn_source                    'fine-focus sealed tube'                        
_diffrn_measurement_device_type   'CCD area detector' 
_diffrn_measurement_method        'phi and omega scans' 
_diffrn_detector_area_resol_mean  ? 
_diffrn_reflns_number             30805
_diffrn_reflns_av_unetI/netI      0.0736
_diffrn_reflns_av_R_equivalents   0.1333
_diffrn_reflns_limit_h_min        -45
_diffrn_reflns_limit_h_max        45
_diffrn_reflns_limit_k_min        -48
_diffrn_reflns_limit_k_max        48
_diffrn_reflns_limit_l_min        -11
_diffrn_reflns_limit_l_max        11
_diffrn_reflns_theta_min          1.746
_diffrn_reflns_theta_max          25.389
_diffrn_reflns_theta_full         25.242
_diffrn_measured_fraction_theta_max   0.996
_diffrn_measured_fraction_theta_full  0.999
_diffrn_reflns_Laue_measured_fraction_max    0.996
_diffrn_reflns_Laue_measured_fraction_full   0.999
_diffrn_reflns_point_group_measured_fraction_max   0.996
_diffrn_reflns_point_group_measured_fraction_full  0.999
_reflns_number_total              5666
_reflns_number_gt                 4550
_reflns_threshold_expression      'I > 2\s(I)'
_reflns_Friedel_coverage          0.000
_reflns_Friedel_fraction_max      .
_reflns_Friedel_fraction_full     .
 
_reflns_special_details
;
 Reflections were merged by SHELXL according to the crystal
 class for the calculation of statistics and refinement.
 
 _reflns_Friedel_fraction is defined as the number of unique
 Friedel pairs measured divided by the number that would be
 possible theoretically, ignoring centric projections and
 systematic absences.
;
 

_computing_data_collection        'Bruker D8 QUEST' 
_computing_cell_refinement        'Bruker D8 QUEST' 
_computing_data_reduction         'Bruker D8 QUEST' 
_computing_structure_solution     'SHELXL-2014 (Sheldrick, 2014)'
_computing_structure_refinement   'SHELXL-2014 (Sheldrick, 2014)'
_computing_molecular_graphics     'SHELXL-2014 (Sheldrick, 2014)'
_computing_publication_material   'Bruker SHELXTL'
 
_refine_special_details
;
 ?
;
_refine_ls_structure_factor_coef  Fsqd
_refine_ls_matrix_type            full
_refine_ls_weighting_scheme       calc
_refine_ls_weighting_details
'w=1/[\s^2^(Fo^2^)+(0.0514P)^2^] where P=(Fo^2^+2Fc^2^)/3'
_atom_sites_solution_primary      ?
_atom_sites_solution_secondary    ?
_atom_sites_solution_hydrogens    geom
_refine_ls_hydrogen_treatment     constr
_refine_ls_extinction_method      none
_refine_ls_extinction_coef        .
_refine_ls_number_reflns          5666
_refine_ls_number_parameters      296
_refine_ls_number_restraints      0
_refine_ls_R_factor_all           0.0512
_refine_ls_R_factor_gt            0.0402
_refine_ls_wR_factor_ref          0.1016
_refine_ls_wR_factor_gt           0.0980
_refine_ls_goodness_of_fit_ref    1.014
_refine_ls_restrained_S_all       1.014
_refine_ls_shift/su_max           0.002
_refine_ls_shift/su_mean          0.000
 
loop_
 _atom_site_label
 _atom_site_type_symbol
 _atom_site_fract_x
 _atom_site_fract_y
 _atom_site_fract_z
 _atom_site_U_iso_or_equiv
 _atom_site_adp_type
 _atom_site_occupancy
 _atom_site_site_symmetry_order  
 _atom_site_calc_flag
 _atom_site_refinement_flags_posn
 _atom_site_refinement_flags_adp
 _atom_site_refinement_flags_occupancy
 _atom_site_disorder_assembly
 _atom_site_disorder_group
In1 In 0.28140(2) 0.08673(2) 0.60363(2) 0.02742(11) Uani 1 1 d . . . . .
N1 N 0.32776(9) 0.13649(9) 0.4900(3) 0.0314(7) Uani 1 1 d . . . . .
N2 N 0.33712(9) 0.09440(10) 0.6779(3) 0.0334(8) Uani 1 1 d . . . . .
O1 O 0.25276(8) 0.11726(8) 0.5673(2) 0.0371(7) Uani 1 1 d . . . . .
O2 O 0.27403(8) 0.09097(8) 0.8137(2) 0.0345(6) Uani 1 1 d . . . . .
Br1 Br 0.25922(2) 0.21953(2) 0.11127(4) 0.04502(14) Uani 1 1 d . . . . .
Br2 Br 0.31280(2) 0.01536(2) 1.26554(4) 0.04546(15) Uani 1 1 d . . . . .
C1 C 0.25428(11) 0.13862(11) 0.4645(3) 0.0293(9) Uani 1 1 d . . . . .
C2 C 0.22169(12) 0.14218(11) 0.4328(3) 0.0316(9) Uani 1 1 d . . . . .
C3 C 0.22457(12) 0.16571(11) 0.3270(3) 0.0345(9) Uani 1 1 d . . . . .
H3 H 0.2036 0.1683 0.3052 0.041 Uiso 1 1 calc R U . . .
C4 C 0.25800(12) 0.18585(11) 0.2515(3) 0.0333(9) Uani 1 1 d . . . . .
C5 C 0.28897(12) 0.18294(11) 0.2771(3) 0.0307(9) Uani 1 1 d . . . . .
H5 H 0.3110 0.1968 0.2256 0.037 Uiso 1 1 calc R U . . .
C6 C 0.28794(11) 0.15868(11) 0.3829(3) 0.0279(8) Uani 1 1 d . . . . .
C7 C 0.18495(13) 0.12072(12) 0.5175(4) 0.0408(10) Uani 1 1 d . . . . .
C8 C 0.16928(14) 0.07771(13) 0.5090(5) 0.0538(12) Uani 1 1 d . . . . .
H8A H 0.1460 0.0646 0.5602 0.081 Uiso 1 1 calc R U . . .
H8B H 0.1877 0.0717 0.5459 0.081 Uiso 1 1 calc R U . . .
H8C H 0.1643 0.0697 0.4154 0.081 Uiso 1 1 calc R U . . .
C9 C 0.19321(15) 0.13355(15) 0.6665(4) 0.0587(14) Uani 1 1 d . . . . .
H9A H 0.2030 0.1606 0.6718 0.088 Uiso 1 1 calc R U . . .
H9B H 0.2118 0.1277 0.7026 0.088 Uiso 1 1 calc R U . . .
H9C H 0.1701 0.1204 0.7186 0.088 Uiso 1 1 calc R U . . .
C10 C 0.15409(15) 0.12806(16) 0.4653(5) 0.0666(15) Uani 1 1 d . . . . .
H10A H 0.1485 0.1200 0.3719 0.100 Uiso 1 1 calc R U . . .
H10B H 0.1626 0.1549 0.4715 0.100 Uiso 1 1 calc R U . . .
H10C H 0.1314 0.1140 0.5193 0.100 Uiso 1 1 calc R U . . .
C11 C 0.32314(12) 0.15892(11) 0.4084(3) 0.0324(9) Uani 1 1 d . . . . .
H11 H 0.3446 0.1770 0.3616 0.039 Uiso 1 1 calc R U . . .
C12 C 0.36752(12) 0.14492(12) 0.5154(4) 0.0402(10) Uani 1 1 d . . . . .
H12A H 0.3800 0.1660 0.5792 0.048 Uiso 1 1 calc R U . . .
H12B H 0.3819 0.1524 0.4307 0.048 Uiso 1 1 calc R U . . .
C13 C 0.36702(12) 0.11021(13) 0.5725(4) 0.0381(10) Uani 1 1 d . . . . .
H13A H 0.3614 0.0915 0.5011 0.046 Uiso 1 1 calc R U . . .
H13B H 0.3917 0.1171 0.6118 0.046 Uiso 1 1 calc R U . . .
C14 C 0.34367(12) 0.08560(11) 0.7955(3) 0.0333(9) Uani 1 1 d . . . . .
H14 H 0.3680 0.0894 0.8127 0.040 Uiso 1 1 calc R U . . .
C15 C 0.31542(11) 0.06985(11) 0.9051(3) 0.0284(9) Uani 1 1 d . . . . .
C16 C 0.28233(11) 0.07310(10) 0.9093(3) 0.0282(9) Uani 1 1 d . . . . .
C17 C 0.25675(11) 0.05745(11) 1.0238(3) 0.0300(9) Uani 1 1 d . . . . .
C18 C 0.26716(12) 0.04036(11) 1.1256(3) 0.0335(9) Uani 1 1 d . . . . .
H18 H 0.2511 0.0298 1.2005 0.040 Uiso 1 1 calc R U . . .
C19 C 0.29982(11) 0.03835(11) 1.1204(3) 0.0315(9) Uani 1 1 d . . . . .
C20 C 0.32458(12) 0.05297(11) 1.0124(3) 0.0326(9) Uani 1 1 d . . . . .
H20 H 0.3469 0.0517 1.0104 0.039 Uiso 1 1 calc R U . . .
C21 C 0.22045(12) 0.06016(12) 1.0332(3) 0.0357(9) Uani 1 1 d . . . . .
C22 C 0.19399(13) 0.04035(15) 0.9087(4) 0.0516(12) Uani 1 1 d . . . . .
H22A H 0.1723 0.0439 0.9130 0.077 Uiso 1 1 calc R U . . .
H22B H 0.1855 0.0135 0.9104 0.077 Uiso 1 1 calc R U . . .
H22C H 0.2079 0.0514 0.8260 0.077 Uiso 1 1 calc R U . . .
C23 C 0.19769(15) 0.04025(18) 1.1605(5) 0.0729(18) Uani 1 1 d . . . . .
H23A H 0.2125 0.0530 1.2400 0.109 Uiso 1 1 calc R U . . .
H23B H 0.1919 0.0141 1.1605 0.109 Uiso 1 1 calc R U . . .
H23C H 0.1744 0.0411 1.1613 0.109 Uiso 1 1 calc R U . . .
C24 C 0.23030(14) 0.10160(13) 1.0403(4) 0.0488(12) Uani 1 1 d . . . . .
H24A H 0.2479 0.1141 1.1139 0.073 Uiso 1 1 calc R U . . .
H24B H 0.2074 0.1028 1.0556 0.073 Uiso 1 1 calc R U . . .
H24C H 0.2418 0.1141 0.9560 0.073 Uiso 1 1 calc R U . . .
C25 C 0.24915(14) 0.02998(13) 0.5271(4) 0.0495(12) Uani 1 1 d . . . . .
H25A H 0.2419 0.0122 0.6012 0.074 Uiso 1 1 calc R U . . .
H25B H 0.2644 0.0254 0.4631 0.074 Uiso 1 1 calc R U . . .
H25C H 0.2266 0.0268 0.4824 0.074 Uiso 1 1 calc R U . . .
 
loop_
 _atom_site_aniso_label
 _atom_site_aniso_U_11
 _atom_site_aniso_U_22
 _atom_site_aniso_U_33
 _atom_site_aniso_U_23
 _atom_site_aniso_U_13
 _atom_site_aniso_U_12
In1 0.03163(18) 0.02910(18) 0.02318(14) 0.00246(10) 0.00292(10) 0.01642(14)
N1 0.0296(19) 0.034(2) 0.0360(16) 0.0061(13) 0.0056(13) 0.0205(17)
N2 0.037(2) 0.039(2) 0.0266(15) 0.0064(13) 0.0064(13) 0.0206(18)
O1 0.0368(17) 0.0462(19) 0.0358(13) 0.0134(12) 0.0095(11) 0.0265(15)
O2 0.0452(18) 0.0481(18) 0.0238(12) 0.0046(11) 0.0044(10) 0.0335(16)
Br1 0.0554(3) 0.0473(3) 0.0374(2) 0.00957(17) -0.00409(18) 0.0295(3)
Br2 0.0489(3) 0.0516(3) 0.0364(2) 0.01315(18) -0.00385(17) 0.0255(2)
C1 0.037(2) 0.025(2) 0.0277(17) -0.0015(14) -0.0008(15) 0.0166(19)
C2 0.037(2) 0.023(2) 0.0365(19) -0.0039(15) -0.0006(16) 0.017(2)
C3 0.039(3) 0.034(2) 0.039(2) -0.0057(17) -0.0071(17) 0.024(2)
C4 0.047(3) 0.027(2) 0.0265(17) -0.0001(15) -0.0047(16) 0.019(2)
C5 0.039(2) 0.028(2) 0.0246(16) -0.0024(14) -0.0002(15) 0.017(2)
C6 0.035(2) 0.024(2) 0.0271(17) -0.0007(14) 0.0012(15) 0.0162(19)
C7 0.037(3) 0.032(3) 0.057(2) 0.0028(18) 0.0068(19) 0.020(2)
C8 0.044(3) 0.041(3) 0.072(3) 0.009(2) 0.014(2) 0.018(3)
C9 0.057(3) 0.068(4) 0.059(3) 0.002(2) 0.025(2) 0.037(3)
C10 0.041(3) 0.065(4) 0.100(4) 0.024(3) 0.011(3) 0.032(3)
C11 0.035(2) 0.032(2) 0.0297(18) 0.0031(15) 0.0094(15) 0.017(2)
C12 0.040(3) 0.037(3) 0.046(2) 0.0060(18) 0.0067(18) 0.021(2)
C13 0.035(3) 0.049(3) 0.038(2) 0.0105(18) 0.0080(16) 0.027(2)
C14 0.033(2) 0.039(3) 0.0307(18) -0.0023(16) 0.0005(15) 0.021(2)
C15 0.032(2) 0.028(2) 0.0231(17) -0.0017(14) -0.0008(14) 0.0131(19)
C16 0.037(2) 0.021(2) 0.0226(16) -0.0045(14) -0.0011(14) 0.0119(19)
C17 0.036(2) 0.027(2) 0.0240(16) -0.0035(14) 0.0002(15) 0.0127(19)
C18 0.041(3) 0.030(2) 0.0234(17) 0.0019(15) 0.0013(15) 0.013(2)
C19 0.038(3) 0.031(2) 0.0240(17) 0.0006(14) -0.0062(15) 0.017(2)
C20 0.036(2) 0.032(2) 0.0325(18) -0.0054(16) -0.0060(16) 0.019(2)
C21 0.036(2) 0.040(3) 0.0319(18) 0.0064(16) 0.0065(16) 0.020(2)
C22 0.042(3) 0.056(3) 0.061(3) -0.014(2) -0.012(2) 0.027(3)
C23 0.052(4) 0.115(5) 0.068(3) 0.047(3) 0.028(2) 0.053(4)
C24 0.049(3) 0.050(3) 0.055(2) -0.011(2) 0.006(2) 0.031(3)
C25 0.050(3) 0.038(3) 0.048(2) -0.0062(19) 0.006(2) 0.013(2)
 
_geom_special_details
;
 All esds (except the esd in the dihedral angle between two l.s. planes)
 are estimated using the full covariance matrix.  The cell esds are taken
 into account individually in the estimation of esds in distances, angles
 and torsion angles; correlations between esds in cell parameters are only
 used when they are defined by crystal symmetry.  An approximate (isotropic)
 treatment of cell esds is used for estimating esds involving l.s. planes.
;
 
loop_
 _geom_bond_atom_site_label_1
 _geom_bond_atom_site_label_2
 _geom_bond_distance
 _geom_bond_site_symmetry_2
 _geom_bond_publ_flag
In1 O2 2.100(2) . ?
In1 O1 2.102(3) . ?
In1 C25 2.129(4) . ?
In1 N2 2.236(3) . ?
In1 N1 2.242(3) . ?
N1 C11 1.291(5) . ?
N1 C12 1.487(5) . ?
N2 C14 1.273(4) . ?
N2 C13 1.471(5) . ?
O1 C1 1.309(4) . ?
O2 C16 1.325(4) . ?
Br1 C4 1.918(3) . ?
Br2 C19 1.911(3) . ?
C1 C2 1.429(5) . ?
C1 C6 1.430(5) . ?
C2 C3 1.372(5) . ?
C2 C7 1.536(6) . ?
C3 C4 1.392(5) . ?
C4 C5 1.338(5) . ?
C5 C6 1.414(5) . ?
C6 C11 1.440(5) . ?
C7 C10 1.509(6) . ?
C7 C8 1.526(6) . ?
C7 C9 1.530(6) . ?
C12 C13 1.501(6) . ?
C14 C15 1.462(5) . ?
C15 C20 1.401(5) . ?
C15 C16 1.408(5) . ?
C16 C17 1.441(5) . ?
C17 C18 1.393(5) . ?
C17 C21 1.528(6) . ?
C18 C19 1.363(5) . ?
C19 C20 1.371(5) . ?
C21 C24 1.517(6) . ?
C21 C23 1.520(5) . ?
C21 C22 1.555(5) . ?
 
loop_
 _geom_angle_atom_site_label_1
 _geom_angle_atom_site_label_2
 _geom_angle_atom_site_label_3
 _geom_angle
 _geom_angle_site_symmetry_1
 _geom_angle_site_symmetry_3
 _geom_angle_publ_flag
O2 In1 O1 88.65(9) . . ?
O2 In1 C25 113.47(14) . . ?
O1 In1 C25 110.63(16) . . ?
O2 In1 N2 81.00(10) . . ?
O1 In1 N2 141.80(12) . . ?
C25 In1 N2 107.21(17) . . ?
O2 In1 N1 120.20(11) . . ?
O1 In1 N1 81.23(11) . . ?
C25 In1 N1 125.30(14) . . ?
N2 In1 N1 72.87(11) . . ?
C11 N1 C12 117.5(3) . . ?
C11 N1 In1 126.1(3) . . ?
C12 N1 In1 116.4(2) . . ?
C14 N2 C13 121.2(3) . . ?
C14 N2 In1 126.3(3) . . ?
C13 N2 In1 112.5(2) . . ?
C1 O1 In1 131.3(2) . . ?
C16 O2 In1 124.4(2) . . ?
O1 C1 C2 119.5(3) . . ?
O1 C1 C6 121.5(3) . . ?
C2 C1 C6 119.0(3) . . ?
C3 C2 C1 118.1(4) . . ?
C3 C2 C7 121.6(4) . . ?
C1 C2 C7 120.3(3) . . ?
C2 C3 C4 121.9(4) . . ?
C5 C4 C3 121.7(3) . . ?
C5 C4 Br1 120.3(3) . . ?
C3 C4 Br1 118.0(3) . . ?
C4 C5 C6 119.6(4) . . ?
C5 C6 C1 119.5(4) . . ?
C5 C6 C11 115.9(3) . . ?
C1 C6 C11 124.3(3) . . ?
C10 C7 C8 107.0(4) . . ?
C10 C7 C9 108.6(4) . . ?
C8 C7 C9 109.6(4) . . ?
C10 C7 C2 111.5(3) . . ?
C8 C7 C2 110.3(3) . . ?
C9 C7 C2 109.9(4) . . ?
N1 C11 C6 126.3(4) . . ?
N1 C12 C13 109.9(3) . . ?
N2 C13 C12 107.0(3) . . ?
N2 C14 C15 124.2(4) . . ?
C20 C15 C16 121.2(3) . . ?
C20 C15 C14 115.2(4) . . ?
C16 C15 C14 123.5(3) . . ?
O2 C16 C15 122.8(3) . . ?
O2 C16 C17 118.0(3) . . ?
C15 C16 C17 119.2(3) . . ?
C18 C17 C16 116.6(4) . . ?
C18 C17 C21 122.1(3) . . ?
C16 C17 C21 121.3(3) . . ?
C19 C18 C17 123.0(3) . . ?
C18 C19 C20 121.5(3) . . ?
C18 C19 Br2 120.7(3) . . ?
C20 C19 Br2 117.8(3) . . ?
C19 C20 C15 118.4(4) . . ?
C24 C21 C23 107.6(4) . . ?
C24 C21 C17 110.5(3) . . ?
C23 C21 C17 111.1(3) . . ?
C24 C21 C22 109.7(3) . . ?
C23 C21 C22 107.1(4) . . ?
C17 C21 C22 110.7(3) . . ?
 
_refine_diff_density_max    0.909
_refine_diff_density_min   -1.602
_refine_diff_density_rms    0.130

_shelxl_version_number 2014-3

_shelx_res_file
;
TITL pmh04-1 in R-3
CELL 0.71073  40.41307  40.41307   9.80610  90.0000  90.0000 120.0000
ZERR   18.00   0.00051   0.00051   0.00020   0.0000   0.0000   0.0000
LATT 3
SYMM -Y, X-Y, Z
SYMM -X+Y, -X, Z
SFAC C  H  N  O  Br In
UNIT 450  558  36  36  36  18
OMIT -1 2 0
OMIT -1 1 1
OMIT -3 5 1
OMIT -8 12 1
L.S. 4
ACTA
BOND
FMAP 2
PLAN 10
WGHT    0.051400
FVAR       0.04151
MOLE 1
IN1   6    0.281396    0.086726    0.603634    11.00000    0.03163    0.02910 =
         0.02318    0.00246    0.00292    0.01642
N1    3    0.327757    0.136489    0.489998    11.00000    0.02958    0.03447 =
         0.03604    0.00612    0.00562    0.02052
N2    3    0.337123    0.094401    0.677850    11.00000    0.03667    0.03924 =
         0.02659    0.00636    0.00643    0.02063
O1    4    0.252764    0.117258    0.567256    11.00000    0.03682    0.04616 =
         0.03581    0.01336    0.00948    0.02647
O2    4    0.274027    0.090967    0.813670    11.00000    0.04519    0.04809 =
         0.02384    0.00460    0.00435    0.03353
BR1   5    0.259216    0.219533    0.111271    11.00000    0.05544    0.04733 =
         0.03736    0.00957   -0.00409    0.02949
BR2   5    0.312798    0.015361    1.265543    11.00000    0.04890    0.05162 =
         0.03637    0.01315   -0.00385    0.02551
C1    1    0.254276    0.138625    0.464456    11.00000    0.03714    0.02459 =
         0.02769   -0.00147   -0.00078    0.01659
C2    1    0.221687    0.142184    0.432803    11.00000    0.03739    0.02347 =
         0.03646   -0.00388   -0.00063    0.01717
C3    1    0.224568    0.165707    0.327039    11.00000    0.03852    0.03409 =
         0.03925   -0.00573   -0.00709    0.02443
AFIX  43
H3    2    0.203568    0.168273    0.305198    11.00000   -1.20000
AFIX   0
C4    1    0.258004    0.185847    0.251459    11.00000    0.04741    0.02654 =
         0.02654   -0.00012   -0.00469    0.01898
C5    1    0.288969    0.182944    0.277088    11.00000    0.03921    0.02842 =
         0.02457   -0.00242   -0.00021    0.01690
AFIX  43
H5    2    0.311044    0.196804    0.225594    11.00000   -1.20000
AFIX   0
C6    1    0.287942    0.158682    0.382919    11.00000    0.03468    0.02403 =
         0.02714   -0.00073    0.00122    0.01623
C7    1    0.184953    0.120718    0.517543    11.00000    0.03721    0.03171 =
         0.05715    0.00285    0.00683    0.01995
C8    1    0.169277    0.077709    0.508954    11.00000    0.04409    0.04084 =
         0.07220    0.00890    0.01363    0.01799
AFIX 137
H8A   2    0.145969    0.064609    0.560219    11.00000   -1.50000
H8B   2    0.187667    0.071725    0.545871    11.00000   -1.50000
H8C   2    0.164333    0.069735    0.415367    11.00000   -1.50000
AFIX   0
C9    1    0.193211    0.133550    0.666517    11.00000    0.05684    0.06778 =
         0.05873    0.00237    0.02492    0.03653
AFIX 137
H9A   2    0.203002    0.160598    0.671802    11.00000   -1.50000
H9B   2    0.211760    0.127677    0.702630    11.00000   -1.50000
H9C   2    0.170051    0.120425    0.718583    11.00000   -1.50000
AFIX   0
C10   1    0.154087    0.128058    0.465315    11.00000    0.04148    0.06542 =
         0.09963    0.02446    0.01104    0.03167
AFIX 137
H10A  2    0.148547    0.120027    0.371919    11.00000   -1.50000
H10B  2    0.162647    0.154857    0.471506    11.00000   -1.50000
H10C  2    0.131427    0.113962    0.519289    11.00000   -1.50000
AFIX   0
C11   1    0.323144    0.158924    0.408428    11.00000    0.03538    0.03234 =
         0.02968    0.00314    0.00943    0.01706
AFIX  43
H11   2    0.344645    0.177000    0.361585    11.00000   -1.20000
AFIX   0
C12   1    0.367516    0.144924    0.515371    11.00000    0.04037    0.03663 =
         0.04579    0.00596    0.00675    0.02090
AFIX  23
H12A  2    0.379981    0.165966    0.579249    11.00000   -1.20000
H12B  2    0.381855    0.152400    0.430728    11.00000   -1.20000
AFIX   0
C13   1    0.367020    0.110211    0.572453    11.00000    0.03513    0.04865 =
         0.03819    0.01049    0.00804    0.02679
AFIX  23
H13A  2    0.361405    0.091517    0.501060    11.00000   -1.20000
H13B  2    0.391663    0.117123    0.611845    11.00000   -1.20000
AFIX   0
C14   1    0.343673    0.085604    0.795450    11.00000    0.03345    0.03924 =
         0.03065   -0.00235    0.00047    0.02065
AFIX  43
H14   2    0.367972    0.089437    0.812719    11.00000   -1.20000
AFIX   0
C15   1    0.315423    0.069854    0.905126    11.00000    0.03190    0.02782 =
         0.02306   -0.00166   -0.00077    0.01313
C16   1    0.282332    0.073104    0.909285    11.00000    0.03693    0.02145 =
         0.02264   -0.00448   -0.00106    0.01193
C17   1    0.256747    0.057450    1.023780    11.00000    0.03553    0.02660 =
         0.02405   -0.00352    0.00023    0.01266
C18   1    0.267160    0.040357    1.125574    11.00000    0.04097    0.02985 =
         0.02342    0.00188    0.00133    0.01293
AFIX  43
H18   2    0.251106    0.029846    1.200451    11.00000   -1.20000
AFIX   0
C19   1    0.299822    0.038346    1.120363    11.00000    0.03844    0.03146 =
         0.02396    0.00056   -0.00616    0.01703
C20   1    0.324579    0.052966    1.012389    11.00000    0.03630    0.03176 =
         0.03254   -0.00541   -0.00597    0.01923
AFIX  43
H20   2    0.346926    0.051697    1.010423    11.00000   -1.20000
AFIX   0
C21   1    0.220448    0.060161    1.033248    11.00000    0.03601    0.03978 =
         0.03194    0.00636    0.00649    0.01950
C22   1    0.193994    0.040351    0.908730    11.00000    0.04167    0.05558 =
         0.06082   -0.01393   -0.01230    0.02680
AFIX 137
H22A  2    0.172257    0.043932    0.913016    11.00000   -1.50000
H22B  2    0.185532    0.013527    0.910353    11.00000   -1.50000
H22C  2    0.207866    0.051365    0.825962    11.00000   -1.50000
AFIX   0
C23   1    0.197695    0.040253    1.160480    11.00000    0.05155    0.11511 =
         0.06785    0.04729    0.02812    0.05347
AFIX 137
H23A  2    0.212471    0.052980    1.239970    11.00000   -1.50000
H23B  2    0.191880    0.014131    1.160545    11.00000   -1.50000
H23C  2    0.174361    0.041072    1.161294    11.00000   -1.50000
AFIX   0
C24   1    0.230305    0.101595    1.040332    11.00000    0.04880    0.05009 =
         0.05508   -0.01067    0.00564    0.03050
AFIX 137
H24A  2    0.247882    0.114125    1.113889    11.00000   -1.50000
H24B  2    0.207445    0.102760    1.055606    11.00000   -1.50000
H24C  2    0.241825    0.114127    0.955983    11.00000   -1.50000
AFIX   0
C25   1    0.249149    0.029984    0.527097    11.00000    0.05039    0.03844 =
         0.04761   -0.00622    0.00551    0.01319
AFIX 137
H25A  2    0.241923    0.012179    0.601245    11.00000   -1.50000
H25B  2    0.264368    0.025359    0.463133    11.00000   -1.50000
H25C  2    0.226613    0.026825    0.482397    11.00000   -1.50000
AFIX   0
HKLF 4

REM  pmh04-1 in R-3
REM R1 =  0.0402 for    4550 Fo > 4sig(Fo)  and  0.0512 for all    5666 data
REM    296 parameters refined using      0 restraints

END

WGHT      0.0514      0.0000

REM Highest difference peak  0.909,  deepest hole -1.602,  1-sigma level  0.130
Q1    1   0.2900 -0.0070  1.2479  11.00000  0.05    0.91
Q2    1   0.1201  0.0837  1.0240  11.00000  0.05    0.85
Q3    1   0.2854  0.1128  0.5797  11.00000  0.05    0.56
Q4    1   0.3037  0.0811  0.6034  11.00000  0.05    0.56
Q5    1   0.2747  0.0566  0.5709  11.00000  0.05    0.56
Q6    1   0.3099  0.1082  0.6294  11.00000  0.05    0.53
Q7    1   0.2594  0.0937  0.6184  11.00000  0.05    0.48
Q8    1   0.2593  0.0951  0.5732  11.00000  0.05    0.47
Q9    1   0.3088  0.1075  0.5628  11.00000  0.05    0.47
Q10   1   0.2793  0.2124  0.1237  11.00000  0.05    0.45
;
_shelx_res_checksum   59743

_shelx_hkl_file
;
   1  -1  -1   75.15    1.11
   1  -1  -1   66.12    1.12
  -2   2   2  304.03    3.35
   2  -2  -2  259.60    2.94
   2  -2  -2  288.45    3.25
  -3   3   3    1.22    0.83
   3  -3  -3    1.94    0.78
   3  -3  -3    2.84    0.86
  -4   4   4  221.71    4.35
   4  -4  -4  188.61    3.76
   4  -4  -4  214.22    4.26
  -5   5   5   95.11    3.47
   5  -5  -5   76.70    2.92
   5  -5  -5   93.16    3.43
  -6   6   6  339.17    6.74
   6  -6  -6  282.16    5.66
   6  -6  -6  309.46    6.34
  -7   7   7    4.94    2.10
   7  -7  -7    3.74    1.85
   7  -7  -7    7.16    2.31
  -8   8   8   82.91    5.12
   8  -8  -8   66.55    4.04
   8  -8  -8   68.18    4.63
  -9   9   9    0.02    2.52
   9  -9  -9   -1.00    2.49
   9  -9  -9    0.82    2.75
  10 -10 -10   10.91    3.46
  10 -10 -10   12.70    4.07
 -11  11  11    3.15    3.73
  11 -11 -11    5.34    3.66
  11 -11 -11    3.10    3.76
   1   1   0   -0.02    0.03
   2   0  -1  205.63    2.00
   0  -2  -1  258.67    2.03
   0  -2  -1  266.94    2.20
   0  -2  -1  278.74    2.27
  -1   3   2  165.39    2.54
   3  -1  -2  558.66    4.41
   3  -1  -2  640.29    4.82
   1  -3  -2  146.81    2.19
   1  -3  -2  150.96    2.40
  -2   4   3   71.02    2.23
   4  -2  -3    8.81    1.03
   4  -2  -3    9.66    1.14
  -4   2   3   10.77    1.30
   2  -4  -3   59.73    1.93
   2  -4  -3   62.68    2.08
  -3   5   4  165.25    3.87
   5  -3  -4  423.47    5.52
   5  -3  -4  486.35    6.17
  -5   3   4  507.07    6.21
   3  -5  -4  140.84    3.21
   3  -5  -4  152.98    3.62
  -4   6   5   46.91    2.97
   6  -4  -5   60.70    2.73
   6  -4  -5   70.16    3.27
  -6   4   5   71.85    3.12
   4  -6  -5   35.67    2.45
   4  -6  -5   43.73    2.91
  -5   7   6  163.00    4.84
   7  -5  -6    0.99    1.61
   7  -5  -6    1.00    1.91
  -7   5   6    1.17    1.63
   5  -7  -6  140.28    4.32
   5  -7  -6  150.30    4.70
  -6   8   7   57.83    3.88
   8  -6  -7    1.13    1.94
   8  -6  -7    0.58    2.26
  -8   6   7    1.08    1.91
   6  -8  -7   48.14    3.27
   6  -8  -7   60.11    4.32
  -7   9   8   17.75    3.20
   9  -7  -8   -1.69    2.18
   9  -7  -8    3.14    2.48
  -9   7   8    0.61    2.53
   7  -9  -8   12.46    2.67
   7  -9  -8   14.98    3.25
  -8  10   9  103.12    6.10
  10  -8  -9   19.16    3.12
  10  -8  -9   24.95    3.76
 -10   8   9   26.44    3.88
   8 -10  -9   92.25    5.33
   8 -10  -9  103.70    5.80
  -9  11  10    3.89    3.35
  11  -9 -10   -3.47    2.76
  11  -9 -10   -2.17    3.48
   9 -11 -10    4.09    3.14
   9 -11 -10    3.44    3.28
 -10  12  11   23.74    4.99
  12 -10 -11    0.90    3.52
  12 -10 -11    2.55    4.18
 -12  10  11   -1.45    4.04
  10 -12 -11   22.67    3.98
  10 -12 -11   19.60    4.85
   2   2   0    0.02    0.03
   1   3   1  157.19    1.78
   3   1  -1  122.76    1.78
   3   1  -1  112.71    1.48
  -1  -3  -1  154.42    1.73
  -1  -3  -1  156.68    1.73
  -1  -3  -1  171.40    1.84
   0   4   2  153.17    2.48
   4   0  -2  132.21    2.39
   4   0  -2  143.79    2.40
   0  -4  -2  137.13    2.19
   0  -4  -2  139.86    2.33
   0  -4  -2  154.96    2.49
  -1   5   3    6.97    1.06
   5  -1  -3  335.82    4.39
   5  -1  -3  389.92    4.70
   1  -5  -3    4.38    0.82
   1  -5  -3    5.33    0.96
  -2   6   4  227.81    4.47
   6  -2  -4  529.60    6.24
   6  -2  -4  609.62    6.81
  -6   2   4  617.07    6.87
   2  -6  -4  200.38    3.80
   2  -6  -4  216.36    4.21
  -3   7   5  422.18    6.56
   7  -3  -5  274.53    5.26
   7  -3  -5  318.59    5.83
  -7   3   5  324.72    5.85
   3  -7  -5  373.60    5.67
   3  -7  -5  413.48    6.56
  -4   8   6   10.96    2.08
   8  -4  -6  105.80    3.87
   8  -4  -6  119.82    4.33
  -8   4   6  123.47    4.31
   4  -8  -6    8.28    1.82
   4  -8  -6    6.72    2.14
  -5   9   7  715.61   10.37
   9  -5  -7   58.79    3.86
   9  -5  -7   70.11    4.14
  -9   5   7   71.59    4.06
   5  -9  -7  629.81    9.02
   5  -9  -7  685.91   10.05
  -6  10   8   12.07    3.03
  10  -6  -8    5.28    2.26
  10  -6  -8    7.41    2.99
 -10   6   8    7.22    2.51
   6 -10  -8    9.65    2.60
   6 -10  -8   11.74    2.82
  -7  11   9   18.16    3.60
  11  -7  -9   54.68    4.87
  11  -7  -9   63.32    5.75
 -11   7   9   60.42    4.87
   7 -11  -9   16.05    3.20
   7 -11  -9   16.25    3.42
  -8  12  10   -3.19    3.01
  12  -8 -10    1.17    3.13
  12  -8 -10    3.22    3.69
   8 -12 -10    2.97    3.10
   8 -12 -10    1.56    3.25
  -9  13  11    7.64    4.45
  13  -9 -11   -0.63    3.46
  13  -9 -11    1.42    4.06
 -13   9  11   -1.56    3.58
   9 -13 -11   10.73    3.88
   9 -13 -11   12.72    4.56
   3   3   0   50.27    1.11
   3   3   0   25.25    0.49
   2   4   1  287.91    2.38
   2   4   1  327.43    2.61
   4   2  -1  459.88    3.74
   4   2  -1  523.09    3.20
  -2  -4  -1  299.13    2.69
  -2  -4  -1  287.21    2.38
  -2  -4  -1  333.96    2.64
   1   5   2  554.39    4.64
   5   1  -2  687.79    5.52
   5   1  -2  781.08    5.39
  -1  -5  -2  522.35    4.26
  -1  -5  -2  505.58    4.34
  -1  -5  -2  533.14    4.49
   0   6   3  104.16    2.74
   6   0  -3   84.05    2.44
   6   0  -3   94.52    2.57
   0  -6  -3   88.01    2.29
   0  -6  -3   87.41    2.40
  -1   7   4    3.69    1.23
   7  -1  -4  142.33    3.51
   7  -1  -4  164.79    3.85
  -7   1   4  170.79    3.85
   1  -7  -4    3.04    1.14
   1  -7  -4    5.73    1.40
  -2   8   5   10.62    1.80
   8  -2  -5  672.19    8.03
   8  -2  -5  786.70    8.76
  -8   2   5  778.49    8.63
   2  -8  -5    8.54    1.46
   2  -8  -5   10.77    1.78
  -3   9   6  393.61    7.26
   9  -3  -6   16.35    2.32
   9  -3  -6   15.11    2.26
  -9   3   6   14.98    2.11
   3  -9  -6  354.12    6.28
   3  -9  -6  374.93    7.07
  -4  10   7  275.37    6.95
  10  -4  -7  234.22    6.19
  10  -4  -7  272.82    6.92
 -10   4   7  276.90    6.82
   4 -10  -7  250.52    6.04
   4 -10  -7  268.81    6.87
  -5  11   8  165.88    6.08
  11  -5  -8    3.90    2.23
  11  -5  -8    5.57    2.64
 -11   5   8    2.56    2.58
   5 -11  -8  152.41    5.58
   5 -11  -8  151.54    5.91
  -6  12   9   16.41    3.76
  -6  12   9   19.96    3.46
  12  -6  -9   16.53    3.12
  12  -6  -9   16.55    3.51
 -12   6   9   18.96    3.52
   6 -12  -9   12.52    2.99
   6 -12  -9   16.09    3.75
  -7  13  10   12.26    4.12
  13  -7 -10    9.40    3.53
  13  -7 -10   13.56    3.77
   7 -13 -10   12.43    3.53
   7 -13 -10   12.30    4.09
  -8  14  11    4.89    4.38
  14  -8 -11   57.75    5.53
  14  -8 -11   63.95    6.40
 -14   8  11   66.11    6.46
   8 -14 -11    5.57    3.61
   8 -14 -11    4.08    4.16
   4   4   0  301.14    3.02
   4   4   0  195.51    1.46
  -4  -4   0  261.28    1.62
   3   5   1    6.41    0.72
   3   5   1    7.79    0.65
   3   5   1    8.70    0.75
   5   3  -1  377.84    3.80
   5   3  -1  426.86    3.01
  -3  -5  -1    7.47    0.76
  -3  -5  -1    6.98    0.66
  -3  -5  -1    8.80    0.70
   2   6   2  295.49    3.40
   2   6   2  337.90    3.73
   6   2  -2  100.36    2.41
   6   2  -2  111.26    2.20
  -2  -6  -2  305.39    3.49
  -2  -6  -2  292.64    3.38
  -2  -6  -2  339.77    3.69
   1   7   3   50.76    2.04
   7   1  -3  106.74    2.83
   7   1  -3  120.02    2.78
  -1  -7  -3   44.78    1.87
  -1  -7  -3   45.62    1.99
   0   8   4  176.40    4.06
   8   0  -4  148.09    3.71
   8   0  -4  167.73    3.80
  -8   0   4  168.78    3.83
   0  -8  -4  158.33    3.49
   0  -8  -4  160.81    3.82
  -1   9   5    8.80    1.73
   9  -1  -5  354.98    6.10
   9  -1  -5  423.52    6.57
  -9   1   5  417.69    6.52
   1  -9  -5    8.35    1.49
   1  -9  -5    8.08    1.85
  -2  10   6   90.67    4.01
  10  -2  -6  124.05    4.29
  10  -2  -6  137.64    4.57
 -10   2   6  141.85    4.72
   2 -10  -6   85.76    3.66
   2 -10  -6   82.78    3.83
  -3  11   7    0.50    2.24
  11  -3  -7  154.26    5.40
  11  -3  -7  185.98    5.76
 -11   3   7  173.52    5.46
   3 -11  -7   -1.16    1.79
   3 -11  -7   -0.79    2.15
  -4  12   8    5.10    2.89
  -4  12   8   10.11    2.94
  12  -4  -8  125.61    5.59
  12  -4  -8  149.06    6.28
 -12   4   8  149.77    6.04
   4 -12  -8    6.46    2.49
   4 -12  -8    5.86    2.65
  -5  13   9   19.29    3.56
  -5  13   9   22.21    3.76
  13  -5  -9   30.46    3.70
  13  -5  -9   40.55    4.79
 -13   5   9   45.64    4.97
   5 -13  -9   16.29    3.21
   5 -13  -9   16.70    3.43
  -6  14  10    1.81    3.31
  14  -6 -10   -0.08    2.76
  14  -6 -10    4.43    3.39
   6 -14 -10    2.61    2.78
   6 -14 -10    1.64    3.19
  -7  15  11    2.49    4.04
  15  -7 -11    0.61    3.56
  15  -7 -11    1.29    3.71
   7 -15 -11    2.08    4.78
   7 -15 -11   -0.58    3.53
   5   5   0  519.07    4.43
   5   5   0  374.23    2.24
  -5  -5   0  483.39    2.44
   4   6   1 1113.75    6.38
   4   6   1  876.60    4.38
   4   6   1 1178.12    5.26
   6   4  -1  252.39    3.42
   6   4  -1  289.10    2.59
  -4  -6  -1 1121.18    6.40
  -4  -6  -1  884.61    4.40
  -4  -6  -1 1197.47    5.28
   3   7   2 1041.39    6.32
   3   7   2 1187.44    6.92
   7   3  -2  495.69    5.31
   7   3  -2  565.81    4.72
  -3  -7  -2 1101.23    6.86
  -3  -7  -2 1053.10    6.36
  -3  -7  -2 1166.82    6.80
   2   8   3  377.81    4.73
   2   8   3  416.14    5.09
   8   2  -3  690.75    7.00
   8   2  -3  781.28    6.73
  -2  -8  -3  379.61    4.64
  -2  -8  -3  375.52    4.72
   1   9   4  189.96    4.12
   9   1  -4  889.55    8.85
   9   1  -4 1049.26    9.02
  -1  -9  -4  171.69    3.70
  -1  -9  -4  170.45    3.94
   0  10   5  654.44    8.27
  10   0  -5  533.45    7.58
  10   0  -5  616.28    7.85
 -10   0   5  611.81    7.77
   0 -10  -5  598.88    7.26
   0 -10  -5  596.64    7.80
  -1  11   6    1.64    1.93
  11  -1  -6    5.77    2.06
  11  -1  -6    7.19    2.16
 -11   1   6    6.98    1.95
   1 -11  -6   -0.51    1.40
   1 -11  -6    1.17    1.93
  -2  12   7   64.29    4.39
  -2  12   7   67.67    4.18
  12  -2  -7   65.59    3.95
  12  -2  -7   77.70    4.65
 -12   2   7   80.15    4.15
   2 -12  -7   57.99    3.76
   2 -12  -7   62.24    4.38
  -3  13   8   49.80    4.35
  -3  13   8   62.71    5.05
  13  -3  -8   53.59    4.55
  13  -3  -8   55.78    4.97
 -13   3   8   59.00    4.69
   3 -13  -8   57.16    4.24
   3 -13  -8   55.62    4.43
  -4  14   9  129.62    6.25
  -4  14   9  144.85    7.16
  14  -4  -9    1.94    2.65
  14  -4  -9    4.05    3.03
 -14   4   9    3.48    2.64
   4 -14  -9  127.16    5.82
   4 -14  -9  132.04    6.28
  -5  15  10    0.52    3.62
  15  -5 -10  110.78    6.68
  15  -5 -10  127.81    6.96
   5 -15 -10   -0.35    3.06
   5 -15 -10   -1.62    3.48
  -6  16  11    4.19    3.85
  16  -6 -11   11.55    4.13
  16  -6 -11    9.73    4.61
   6 -16 -11    3.10    3.68
   6   6   0  210.67    3.18
   6   6   0  164.71    1.68
  -6  -6   0  205.47    1.78
   5   7   1   61.65    1.94
   5   7   1   39.86    1.13
   5   7   1   70.88    1.52
   7   5  -1   64.35    2.17
   7   5  -1   72.97    1.48
  -5  -7  -1   62.99    1.94
  -5  -7  -1   41.80    1.17
  -5  -7  -1   71.44    1.50
   4   8   2  280.52    3.42
   4   8   2  346.96    3.92
   8   4  -2   18.44    1.57
   8   4  -2   20.26    1.33
  -4  -8  -2  297.57    3.88
  -4  -8  -2  285.13    3.45
  -4  -8  -2  337.48    3.81
   3   9   3    4.67    1.06
   3   9   3    5.54    1.15
   9   3  -3  204.77    4.15
   9   3  -3  231.25    3.84
  -3  -9  -3    5.45    1.15
  -3  -9  -3    5.06    1.09
   2  10   4  210.30    4.21
   2  10   4  233.29    4.64
  10   2  -4   78.26    3.14
  10   2  -4   90.37    3.01
  -2 -10  -4  210.58    4.12
  -2 -10  -4  207.67    4.19
   1  11   5   10.65    1.78
   1  11   5   12.57    2.08
  11   1  -5    5.09    1.69
  11   1  -5    6.52    1.76
 -11  -1   5    5.63    1.68
  -1 -11  -5    9.07    1.58
  -1 -11  -5    7.78    1.68
   0  12   6   74.10    3.74
   0  12   6   85.83    4.28
  12   0  -6   68.65    3.72
  12   0  -6   81.04    4.12
 -12   0   6   81.85    3.96
   0 -12  -6   73.36    3.59
   0 -12  -6   75.77    3.77
  -1  13   7    3.54    2.39
  -1  13   7    5.14    2.56
  13  -1  -7  313.30    7.22
  13  -1  -7  382.19    8.00
 -13   1   7  366.05    7.64
   1 -13  -7    6.35    2.23
   1 -13  -7    5.87    2.45
  -2  14   8  105.82    5.67
  -2  14   8  117.90    5.89
  14  -2  -8  102.15    5.47
  14  -2  -8  131.67    6.10
 -14   2   8  120.29    5.29
   2 -14  -8  102.40    4.99
   2 -14  -8  105.11    5.68
  -3  15   9    7.77    3.12
  -3  15   9    8.90    4.30
  15  -3  -9  104.25    6.06
  15  -3  -9  117.68    6.14
 -15   3   9  120.27    6.22
   3 -15  -9    8.94    2.85
   3 -15  -9    8.90    3.10
  -4  16  10   84.87    6.78
  16  -4 -10   95.60    6.57
  16  -4 -10  115.84    7.38
   4 -16 -10   89.05    5.84
   4 -16 -10   83.76    6.70
  -5  17  11   12.63    4.55
  17  -5 -11   17.78    4.38
  17  -5 -11   21.78    4.61
   5 -17 -11    8.53    4.27
   7   7   0  161.49    3.15
   7   7   0  129.58    1.65
  -7  -7   0  158.98    1.70
   6   8   1   61.80    2.05
   6   8   1   32.92    1.11
   6   8   1   66.73    1.56
   8   6  -1   22.32    1.62
   8   6  -1   28.96    1.15
  -6  -8  -1   74.63    1.58
   5   9   2  582.93    5.73
   5   9   2  510.26    4.59
   5   9   2  646.86    5.34
   9   5  -2  144.34    3.39
   9   5  -2  170.04    2.80
  -5  -9  -2  597.05    5.80
  -5  -9  -2  522.43    4.64
  -5  -9  -2  647.74    5.29
   4  10   3  109.04    2.78
   4  10   3  121.68    3.06
  10   4  -3    2.87    1.27
  10   4  -3    3.15    1.16
  -4 -10  -3  116.03    3.05
  -4 -10  -3  109.63    2.79
   3  11   4   21.11    1.90
   3  11   4   22.41    2.33
  11   3  -4   15.40    1.95
  11   3  -4   17.51    2.18
  -3 -11  -4   22.24    2.14
  -3 -11  -4   23.17    2.12
   2  12   5    1.67    1.61
   2  12   5    2.17    1.73
  12   2  -5   30.30    2.78
  12   2  -5   31.54    2.81
 -12  -2   5   32.14    2.64
  -2 -12  -5    1.50    1.49
  -2 -12  -5    1.29    1.61
   1  13   6  268.13    6.21
   1  13   6  293.39    6.60
  13   1  -6  301.94    6.75
  13   1  -6  359.01    7.07
 -13  -1   6  345.63    6.75
  -1 -13  -6  275.91    5.84
  -1 -13  -6  271.36    6.23
   0  14   7   31.15    3.42
   0  14   7   35.95    4.12
  14   0  -7   25.96    3.10
  14   0  -7   31.59    3.55
 -14   0   7   30.89    3.59
   0 -14  -7   30.41    3.43
   0 -14  -7   30.95    3.39
  -1  15   8   36.95    4.10
  -1  15   8   47.22    4.42
  15  -1  -8   88.57    5.02
  15  -1  -8  105.20    5.35
 -15   1   8  113.00    5.49
   1 -15  -8   42.56    4.09
   1 -15  -8   36.76    4.08
  -2  16   9   44.86    5.39
  16  -2  -9    9.18    3.36
  16  -2  -9   10.27    3.66
 -16   2   9    8.21    3.13
   2 -16  -9   37.69    4.51
   2 -16  -9   39.80    4.59
  -3  17  10   -1.00    3.55
  17  -3 -10   -2.21    3.27
  17  -3 -10   -1.00    3.27
   3 -17 -10    3.00    3.65
   8   8   0  323.87    4.61
   8   8   0  278.30    2.45
  -8  -8   0  327.66    2.52
   7   9   1   81.10    2.45
   7   9   1   35.86    1.16
   7   9   1   76.61    1.70
   9   7  -1  250.34    4.25
   9   7  -1  298.32    2.95
  -7  -9  -1   93.15    1.79
   6  10   2  319.04    4.60
   6  10   2  256.94    3.35
   6  10   2  352.72    4.11
  10   6  -2  303.80    5.00
  10   6  -2  336.57    3.88
  -6 -10  -2  324.39    4.64
  -6 -10  -2  253.88    3.35
  -6 -10  -2  352.64    4.03
   5  11   3  105.93    2.78
   5  11   3  129.22    3.25
  11   5  -3  220.87    4.71
  11   5  -3  248.01    4.06
  -5 -11  -3  115.33    3.21
  -5 -11  -3  107.52    2.80
   4  12   4   61.21    2.75
   4  12   4   71.20    3.08
  12   4  -4  198.57    4.91
  12   4  -4  225.78    4.65
  -4 -12  -4   64.37    2.91
  -4 -12  -4   56.20    2.68
   3  13   5    8.09    1.89
   3  13   5   11.84    2.06
  13   3  -5   72.73    3.94
  13   3  -5   84.52    3.69
 -13  -3   5   83.97    3.48
  -3 -13  -5   10.94    1.94
  -3 -13  -5   12.52    2.02
   2  14   6   24.11    2.70
   2  14   6   27.11    2.95
  14   2  -6  106.05    4.61
  14   2  -6  123.25    4.72
 -14  -2   6  114.27    4.42
  -2 -14  -6   26.27    3.02
  -2 -14  -6   23.28    2.69
   1  15   7  103.45    5.00
   1  15   7  118.13    5.39
  15   1  -7   19.91    2.97
  15   1  -7   27.82    3.38
 -15  -1   7   22.27    2.91
  -1 -15  -7  103.35    4.60
  -1 -15  -7  100.79    4.98
   0  16   8    0.81    2.42
   0  16   8    4.82    2.97
  16   0  -8    0.88    2.70
  16   0  -8    2.23    2.87
 -16   0   8    1.67    2.52
   0 -16  -8    1.93    2.33
   0 -16  -8    2.98    2.45
  -1  17   9   20.94    3.65
  17  -1  -9    4.00    2.95
  17  -1  -9   10.12    3.58
 -17   1   9    9.19    3.13
   1 -17  -9   19.10    3.30
   1 -17  -9   19.94    3.59
  -2  18  10   10.41    4.05
  18  -2 -10   36.42    4.57
  18  -2 -10   51.83    6.36
   2 -18 -10    9.22    3.95
   9   9   0  178.68    3.73
   9   9   0  162.33    2.03
  -9  -9   0  190.30    2.06
   8  10   1   61.37    2.53
   8  10   1   29.13    1.16
  10   8  -1 1052.88    8.91
  10   8  -1 1212.13    5.94
  -8 -10  -1   72.12    1.70
   7  11   2  268.15    4.53
   7  11   2  192.19    3.00
   7  11   2  294.48    3.86
  11   7  -2   14.20    1.86
  11   7  -2   16.75    1.44
  -7 -11  -2  263.92    4.49
  -7 -11  -2  199.72    3.06
  -7 -11  -2  300.67    3.83
   6  12   3  293.05    4.94
   6  12   3  265.47    4.20
   6  12   3  339.18    4.90
  12   6  -3   56.93    2.94
  12   6  -3   64.97    2.51
  -6 -12  -3  306.06    5.04
  -6 -12  -3  267.55    4.21
   5  13   4   12.83    1.72
   5  13   4   12.58    1.81
  13   5  -4   20.47    2.48
  13   5  -4   22.08    2.27
  -5 -13  -4   13.15    1.85
  -5 -13  -4   15.26    1.79
   4  14   5  250.64    5.39
   4  14   5  289.50    5.96
  14   4  -5    7.62    2.28
  14   4  -5    5.55    1.82
 -14  -4   5    7.36    1.75
  -4 -14  -5  257.31    5.48
  -4 -14  -5  247.73    5.36
   3  15   6    9.42    2.22
   3  15   6   12.26    2.51
  15   3  -6   93.49    4.57
  15   3  -6  103.03    4.25
 -15  -3   6  104.40    4.26
  -3 -15  -6    9.10    2.15
  -3 -15  -6   12.73    2.33
   2  16   7    7.02    2.61
   2  16   7    3.05    2.59
  16   2  -7   26.57    3.51
  16   2  -7   30.69    3.55
 -16  -2   7   25.86    2.98
  -2 -16  -7    6.61    2.43
  -2 -16  -7    4.19    2.47
   1  17   8    2.51    2.50
   1  17   8    0.18    2.77
  17   1  -8    9.41    2.93
  17   1  -8   17.23    3.49
 -17  -1   8   14.98    3.01
  -1 -17  -8    0.19    2.48
  -1 -17  -8    1.66    2.43
   0  18   9    6.53    3.42
  18   0  -9    2.99    3.31
  18   0  -9    4.54    3.11
 -18   0   9    5.61    3.08
   0 -18  -9    4.59    3.31
  -1  19  10   24.78    4.48
  19  -1 -10    0.53    3.53
  19  -1 -10    0.11    3.71
   1 -19 -10   25.25    4.45
  10  10   0  318.14    5.14
  10  10   0  303.27    2.80
 -10 -10   0  345.56    2.83
   9  11   1  248.34    4.60
   9  11   1  119.61    2.06
  11   9  -1   20.28    2.07
  11   9  -1   21.32    1.23
  -9 -11  -1  287.15    3.11
   8  12   2  102.24    3.30
   8  12   2   65.86    1.94
   8  12   2  108.86    2.67
  12   8  -2  214.67    4.76
  12   8  -2  249.02    3.52
  -8 -12  -2  104.90    3.27
  -8 -12  -2   66.76    1.99
  -8 -12  -2  115.17    2.73
   7  13   3   11.30    1.68
   7  13   3   10.20    1.30
   7  13   3   16.44    2.01
  13   7  -3  311.78    6.00
  13   7  -3  359.09    4.93
  -7 -13  -3   10.53    1.70
  -7 -13  -3   10.72    1.33
   6  14   4   29.00    2.43
   6  14   4   33.26    2.78
  14   6  -4   52.60    3.61
  14   6  -4   56.84    2.99
  -6 -14  -4   33.34    2.76
  -6 -14  -4   28.41    2.44
   5  15   5    2.21    1.70
   5  15   5    2.99    1.86
  15   5  -5  636.84    9.68
  15   5  -5  728.37    8.90
 -15  -5   5  698.58    8.37
  -5 -15  -5    2.85    1.81
  -5 -15  -5    1.74    1.68
   4  16   6   96.08    4.32
   4  16   6  109.61    4.80
  16   4  -6   44.09    3.87
  16   4  -6   48.58    3.77
 -16  -4   6   43.40    3.54
  -4 -16  -6   97.94    4.36
  -4 -16  -6   92.87    4.27
   3  17   7    1.41    2.38
   3  17   7    3.47    2.59
  17   3  -7    2.60    2.49
  17   3  -7    6.36    2.73
 -17  -3   7    4.81    2.25
  -3 -17  -7    4.21    2.42
  -3 -17  -7    1.38    2.34
   2  18   8   38.53    4.64
   2  18   8   47.64    5.03
  18   2  -8   36.90    4.38
  18   2  -8   40.89    4.27
 -18  -2   8   40.26    4.39
  -2 -18  -8   40.49    4.62
  -2 -18  -8   38.67    4.65
   1  19   9   54.72    5.61
  19   1  -9   16.29    4.04
  19   1  -9   23.99    4.19
 -19  -1   9   19.40    3.57
  -1 -19  -9   60.76    5.64
   0  20  10   -0.60    3.62
  20   0 -10   -1.54    3.16
  20   0 -10   -0.43    3.62
   0 -20 -10   -0.01    3.53
  11  11   0  317.60    5.55
  11  11   0  304.30    2.91
 -11 -11   0  339.52    2.89
  10  12   1  653.05    7.54
  10  12   1  341.11    3.37
  12  10  -1   63.71    3.21
  12  10  -1   69.78    1.80
 -10 -12  -1  729.70    4.92
   9  13   2   23.83    2.42
   9  13   2   11.83    1.23
   9  13   2   23.99    1.76
  13   9  -2    3.24    1.76
  13   9  -2    3.11    1.02
  -9 -13  -2   27.25    1.97
   8  14   3    9.68    1.84
   8  14   3    8.86    1.32
   8  14   3   10.92    1.59
  14   8  -3    1.93    1.69
  14   8  -3    3.25    1.29
  -8 -14  -3   10.79    1.85
  -8 -14  -3    9.11    1.34
   7  15   4  312.49    5.91
   7  15   4  267.80    4.97
   7  15   4  345.18    5.78
  15   7  -4   99.59    4.27
  15   7  -4  106.45    3.50
  -7 -15  -4  320.47    5.98
  -7 -15  -4  272.53    5.02
   6  16   5   14.94    2.19
   6  16   5   18.62    2.44
  16   6  -5  252.52    6.76
  16   6  -5  289.65    5.89
 -16  -6   5  265.95    5.49
  -6 -16  -5   13.93    2.32
  -6 -16  -5   17.26    2.24
   5  17   6   97.46    4.41
   5  17   6  116.47    4.93
  17   5  -6    8.09    2.59
  17   5  -6    7.31    2.42
 -17  -5   6   11.71    2.24
  -5 -17  -6  108.56    4.82
  -5 -17  -6  100.13    4.42
   4  18   7   -0.21    2.35
   4  18   7   -0.20    2.49
  18   4  -7   26.04    3.56
  18   4  -7   27.00    3.30
 -18  -4   7   25.32    3.00
  -4 -18  -7    1.47    2.40
  -4 -18  -7    0.09    2.32
   3  19   8   18.84    3.15
   3  19   8   26.86    3.84
  19   3  -8    1.96    2.78
  19   3  -8    3.57    2.85
 -19  -3   8    2.93    2.52
  -3 -19  -8   18.82    3.17
   2  20   9   29.43    4.29
  20   2  -9   11.94    3.96
  20   2  -9   11.98    3.91
  -2 -20  -9   23.82    4.05
   1  21  10   67.05    6.45
  21   1 -10    3.33    3.54
  21   1 -10    1.86    3.88
  -1 -21 -10   66.53    6.37
  12  12   0  163.96    4.33
  12  12   0  174.14    2.36
 -12 -12   0  185.84    2.25
  11  13   1  517.76    7.14
  11  13   1  307.38    3.30
  13  11  -1   20.26    2.44
  13  11  -1   23.02    1.40
 -11 -13  -1  589.17    4.53
  10  14   2   10.96    1.90
  10  14   2    6.92    0.99
  10  14   2   16.24    1.68
  14  10  -2    8.86    1.96
  14  10  -2   12.41    1.31
   9  15   3  195.94    4.89
   9  15   3  141.32    3.28
   9  15   3  214.05    4.24
  15   9  -3    1.46    1.98
  15   9  -3    0.25    1.24
  -9 -15  -3  205.32    4.95
  -9 -15  -3  143.48    3.34
   8  16   4   14.34    2.27
   8  16   4   13.16    1.78
   8  16   4   14.92    2.06
  16   8  -4    4.51    2.11
  16   8  -4    4.06    1.59
  -8 -16  -4   13.66    2.29
  -8 -16  -4   12.78    1.77
   7  17   5    0.78    1.96
   7  17   5   -1.44    1.53
   7  17   5   -0.53    1.89
  17   7  -5   23.98    3.26
  17   7  -5   27.04    2.97
 -17  -7   5   30.16    2.87
  -7 -17  -5   -0.92    1.98
  -7 -17  -5    0.85    1.62
   6  18   6    1.22    1.96
   6  18   6    1.37    2.22
  18   6  -6  168.59    6.48
  18   6  -6  179.82    5.56
 -18  -6   6  173.88    5.53
  -6 -18  -6    2.02    2.26
  -6 -18  -6    0.12    1.93
   5  19   7   72.63    4.58
   5  19   7   82.69    5.06
  19   5  -7    0.10    2.56
  19   5  -7   -0.06    2.49
  -5 -19  -7   74.64    4.71
  -5 -19  -7   75.12    4.63
   4  20   8   27.75    3.72
   4  20   8   39.66    4.95
  20   4  -8   37.24    4.38
  20   4  -8   48.74    5.05
  -4 -20  -8   28.97    3.72
   3  21   9   14.27    3.42
  21   3  -9   53.30    5.63
  21   3  -9   65.99    6.06
  -3 -21  -9   13.14    3.47
  13  13   0   16.22    2.17
  12  14   1   19.03    2.38
  12  14   1   13.23    1.61
  14  12  -1   51.43    3.22
  14  12  -1   58.70    2.18
  11  15   2    5.90    2.01
  11  15   2    1.50    0.88
  15  11  -2    1.81    1.82
  15  11  -2    1.63    1.04
  10  16   3   84.04    3.91
  10  16   3   52.55    2.32
  10  16   3   84.87    3.15
  16  10  -3   92.64    4.57
  16  10  -3   92.80    3.07
   9  17   4  223.95    5.61
   9  17   4  164.34    4.10
   9  17   4  230.05    5.04
  17   9  -4   70.96    4.54
  17   9  -4   84.89    3.48
  -9 -17  -4  219.75    5.58
  -9 -17  -4  173.12    5.06
   8  18   5   65.04    4.00
   8  18   5   54.21    3.35
   8  18   5   74.99    3.87
  18   8  -5    5.08    2.73
  18   8  -5    5.56    2.06
  -8 -18  -5   67.19    4.08
  -8 -18  -5   62.04    3.86
   7  19   6   27.53    3.21
   7  19   6   23.07    2.73
   7  19   6   26.24    3.13
  19   7  -6   24.04    3.70
  19   7  -6   29.52    3.55
  -7 -19  -6   30.20    3.75
  -7 -19  -6   23.03    3.08
   6  20   7   44.55    4.15
   6  20   7   54.72    4.70
  20   6  -7   33.34    4.38
  20   6  -7   33.41    3.71
  -6 -20  -7   43.57    5.64
   5  21   8   15.92    3.69
   5  21   8   20.92    3.67
  21   5  -8   17.10    3.77
  21   5  -8   25.08    3.87
  22   4  -9    1.32    3.29
  22   4  -9    3.14    4.71
  14  14   0  196.82    5.43
  13  15   1  113.07    4.40
  15  13  -1    2.00    1.84
  12  16   2    4.24    2.12
  16  12  -2    2.22    2.01
  11  17   3   49.52    3.60
  17  11  -3   39.50    3.62
  10  18   4   -0.73    2.12
  18  10  -4   76.12    4.89
 -10 -18  -4    3.07    2.16
   9  19   5   28.90    3.15
  19   9  -5  108.36    5.36
  -9 -19  -5   32.29    3.92
   8  20   6   29.91    3.37
  20   8  -6    0.94    2.67
  -8 -20  -6   30.54    3.45
  21   7  -7    1.65    2.93
  22   6  -8    5.87    3.43
  23   5  -9    7.60    3.79
  15  15   0   38.48    3.38
  14  16   1    2.27    1.94
  16  14  -1   12.77    2.68
  13  17   2   13.39    2.58
  17  13  -2   26.20    3.23
  12  18   3   47.17    3.79
  18  12  -3  135.01    5.66
  11  19   4   85.13    4.47
  19  11  -4  482.02    9.53
  10  20   5   14.11    2.87
  20  10  -5   21.97    3.46
 -10 -20  -5   13.82    2.91
   9  21   6   42.42    4.72
  21   9  -6   54.86    5.57
  22   8  -7    5.38    3.26
  23   7  -8   30.28    4.95
  16  16   0    1.26    2.42
  15  17   1   30.12    3.28
  17  15  -1    0.22    2.15
  14  18   2   22.17    2.92
  18  14  -2   12.06    2.69
  13  19   3  197.97    5.94
  19  13  -3   74.35    5.05
  12  20   4   51.84    4.51
  20  12  -4   16.65    3.21
  11  21   5  148.73    5.71
  21  11  -5   11.93    3.26
 -11 -21  -5  148.93    5.68
  22  10  -6   33.47    4.22
  23   9  -7   11.53    3.68
  24   8  -8   -0.09    3.45
  17  17   0   99.66    5.15
  16  18   1   76.16    4.69
  18  16  -1    0.09    2.57
  15  19   2    1.83    2.38
  19  15  -2   39.13    4.06
  14  20   3  484.99    8.77
  20  14  -3  126.07    6.03
  13  21   4    6.39    2.70
  21  13  -4  117.10    5.88
  12  22   5   83.62    5.57
  22  12  -5   28.12    4.30
  23  11  -6    1.59    3.57
  24  10  -7   22.75    4.30
  25   9  -8   20.81    4.53
  18  18   0   -1.17    2.30
  17  19   1  110.02    5.04
  19  17  -1   38.52    4.14
  16  20   2  193.17    6.37
  20  16  -2    7.26    2.85
  15  21   3   47.06    4.51
  21  15  -3    5.77    2.89
  14  22   4   33.14    3.78
  22  14  -4   13.71    3.42
  23  13  -5    4.76    3.27
  24  12  -6   16.30    3.93
  25  11  -7    7.99    3.85
  19  19   0   55.22    5.03
  18  20   1   -0.03    2.77
  20  18  -1   31.63    3.74
  17  21   2  100.35    5.47
  21  17  -2   65.67    5.01
  16  22   3    0.96    2.86
  22  16  -3  104.19    6.30
  15  23   4    0.18    3.11
  23  15  -4   10.41    3.45
  24  14  -5   -0.19    3.21
  25  13  -6   -0.49    3.88
  26  12  -7   -5.07    3.97
  20  20   0   77.55    5.15
  19  21   1  123.27    6.25
  21  19  -1   73.24    5.70
  18  22   2    6.52    3.09
  22  18  -2  258.69    8.33
  17  23   3   21.59    3.69
  23  17  -3    7.71    3.72
  24  16  -4   29.68    4.67
  25  15  -5   15.81    4.03
  26  14  -6   -1.24    4.00
  21  21   0   77.69    5.99
  20  22   1    3.72    3.41
  22  20  -1    6.72    3.57
  19  23   2   47.97    5.35
  23  19  -2   30.12    4.54
  18  24   3    0.54    5.21
  24  18  -3   25.77    4.56
  25  17  -4   59.88    5.93
  26  16  -5    4.27    4.16
  22  22   0   28.79    4.11
  21  23   1   -1.86    3.39
  23  21  -1   34.40    4.77
  20  24   2    6.14    3.60
  24  20  -2   78.37    6.56
  25  19  -3   31.16    4.94
  26  18  -4   18.29    4.28
  23  23   0    4.58    3.89
  22  24   1   -0.82    3.56
  24  22  -1   12.01    4.23
  25  21  -2    8.17    4.00
  26  20  -3   10.26    3.98
  24  24   0   43.97    5.27
  23  25   1    0.74    4.02
  25  23  -1    2.64    3.96
  10  -9 -11    2.79    3.04
  10  -9 -11    0.18    3.59
   9 -10 -11    1.86    3.36
   9 -10 -11    0.93    4.04
  -9  10  11   -1.22    4.00
   9  -8 -10   57.28    5.25
   9  -8 -10   61.82    5.67
   8  -9 -10    4.07    2.94
   8  -9 -10    6.41    3.70
   8  -7  -9   -2.83    2.42
   8  -7  -9    1.44    3.07
   7  -8  -9    0.96    2.21
   7  -8  -9   -2.07    2.99
  -7   8   9    1.93    2.65
  -8   7   9    1.73    2.94
   7  -6  -8  120.42    5.08
   7  -6  -8  135.48    5.94
   6  -7  -8   16.84    2.74
   6  -7  -8   22.51    3.47
  -6   7   8   20.34    3.21
  -7   6   8  147.23    6.01
   6  -5  -7   99.38    4.28
   6  -5  -7  119.92    4.81
   5  -6  -7  337.98    6.74
   5  -6  -7  387.85    7.86
  -5   6   7  396.80    7.89
  -6   5   7  115.88    4.97
   5  -4  -6   55.05    3.11
   5  -4  -6   59.34    3.37
   4  -5  -6  164.95    4.33
   4  -5  -6  187.34    5.05
  -4   5   6  189.78    5.28
  -5   4   6   63.53    3.43
   4  -3  -5  451.22    6.21
   4  -3  -5  516.42    7.06
   3  -4  -5  447.88    6.04
   3  -4  -5  510.96    7.08
  -3   4   5  518.30    7.09
  -4   3   5  549.24    7.26
   3  -2  -4   87.27    2.56
   3  -2  -4  104.23    3.03
   2  -3  -4  454.16    5.34
   2  -3  -4  506.32    6.18
  -2   3   4  529.74    6.30
  -3   2   4  110.29    3.25
   2  -1  -3 1071.50    7.01
   2  -1  -3 1248.35    8.15
   1  -2  -3 1442.60    7.89
   1  -2  -3 1575.60    9.08
  -1   2   3 1601.36    9.24
  -2   1   3 1288.83    8.22
   1   0  -2  137.61    2.07
   1   0  -2  152.01    2.37
   1   0  -2  164.97    2.42
   0  -1  -2  137.37    1.98
   0  -1  -2  152.00    2.35
   0  -1  -2  164.47    2.45
   0   1   2  167.17    2.50
  -1   0   2  166.91    2.46
   0   1  -1   84.85    1.13
  -1   0  -1   89.24    1.00
  -1   0  -1   89.58    1.24
  -1   0  -1   77.68    1.21
   0  -1   1  105.33    1.34
  -2   3   1  168.18    1.91
   3  -2  -1   71.13    1.28
   2  -3  -1  177.05    1.92
   2  -3  -1  179.03    1.97
   4  -3  -2   59.53    1.62
   4  -3  -2   68.04    1.80
   3  -4  -2  354.81    3.62
   3  -4  -2  380.57    3.87
   5  -4  -3   31.28    1.68
   5  -4  -3   36.23    1.87
   4  -5  -3    3.32    0.91
   4  -5  -3    2.44    0.90
  -5   6   4   62.71    2.64
  -6   5   4  233.14    4.42
   6  -5  -4  204.00    4.00
   6  -5  -4  229.58    4.39
   5  -6  -4   53.49    2.42
   5  -6  -4   57.50    2.69
  -6   7   5  157.97    4.28
  -7   6   5   98.92    3.76
   7  -6  -5   86.91    3.19
   7  -6  -5  100.77    3.59
   6  -7  -5  142.99    3.86
   6  -7  -5  160.15    4.46
  -7   8   6   37.68    3.34
  -8   7   6   97.09    4.23
   8  -7  -6   88.33    3.65
   8  -7  -6   98.16    4.34
   7  -8  -6   33.76    2.96
   7  -8  -6   38.69    3.13
  -8   9   7   53.98    4.12
  -9   8   7   10.91    2.47
   9  -8  -7    9.94    2.39
   9  -8  -7    8.71    2.41
   8  -9  -7   46.37    3.63
   8  -9  -7   51.73    4.20
  -9  10   8   67.74    4.92
 -10   9   8   21.63    3.28
  10  -9  -8   18.73    3.05
  10  -9  -8   17.41    3.09
   9 -10  -8   57.31    4.38
   9 -10  -8   58.08    4.50
 -10  11   9  127.86    6.27
 -10  11   9  145.29    6.68
 -11  10   9    7.42    2.87
  11 -10  -9    2.11    2.77
  11 -10  -9    6.77    3.10
  10 -11  -9  121.97    5.91
  10 -11  -9  124.71    6.19
 -11  12  10   12.72    3.76
 -12  11  10   -1.06    3.21
  12 -11 -10    0.10    2.72
  12 -11 -10   -1.93    3.17
  11 -12 -10   14.56    3.75
  11 -12 -10   16.21    3.88
 -12  13  11   18.43    4.48
 -13  12  11    6.45    4.38
  13 -12 -11    8.03    3.87
  13 -12 -11    7.46    4.38
  12 -13 -11   19.35    4.33
  12 -13 -11   20.36    4.50
  11  -8 -11   23.79    4.26
  11  -8 -11   29.44    5.22
   8 -11 -11   57.71    5.76
   8 -11 -11   64.84    6.98
  -8  11  11   56.86    6.92
  10  -7 -10    5.99    3.21
  10  -7 -10    5.62    3.37
   7 -10 -10   14.22    3.44
   7 -10 -10   19.25    4.26
   9  -6  -9   99.68    5.40
   9  -6  -9  115.06    5.92
   6  -9  -9   17.25    3.13
   6  -9  -9   15.81    3.34
  -6   9   9   17.63    3.33
  -9   6   9  117.94    5.83
   8  -5  -8  137.45    5.33
   8  -5  -8  173.92    6.47
   5  -8  -8    2.43    2.24
   5  -8  -8    3.07    2.44
  -5   8   8    5.34    2.70
  -8   5   8  165.73    6.20
   7  -4  -7  194.82    5.31
   7  -4  -7  236.10    6.43
   4  -7  -7  398.69    7.18
   4  -7  -7  430.88    8.05
  -4   7   7  459.69    8.29
  -7   4   7  243.45    6.42
   6  -3  -6   42.51    2.94
   6  -3  -6   48.92    3.45
   3  -6  -6  174.24    4.39
   3  -6  -6  187.69    5.25
  -3   6   6  192.88    5.34
  -6   3   6   48.58    3.41
   5  -2  -5   97.69    3.32
   5  -2  -5  114.05    3.67
   2  -5  -5  618.00    6.96
   2  -5  -5  687.35    8.14
  -2   5   5  724.13    8.42
  -5   2   5  116.11    3.69
   4  -1  -4    2.76    1.05
   4  -1  -4    2.45    1.12
   1  -4  -4  196.24    3.59
   1  -4  -4  209.42    4.14
  -1   4   4  226.33    4.38
  -4   1   4    4.43    1.18
   3   0  -3  113.89    2.56
   3   0  -3  131.85    2.82
   0  -3  -3  119.69    2.40
   0  -3  -3  124.33    2.71
   0   3   3  142.54    2.96
  -3   0   3  137.84    2.91
   2   1  -2  140.82    2.27
   2   1  -2  153.73    2.44
  -1  -2  -2  609.24    3.98
  -1  -2  -2  611.57    4.55
  -1  -2  -2  644.81    4.80
   1   2   2  649.63    4.85
   1   2  -1  172.88    1.90
   1   2  -1  127.77    1.58
  -2  -1  -1   82.35    1.00
  -2  -1  -1   84.32    1.19
  -2  -1  -1   88.47    1.36
   2   1   1   73.33    1.25
  -1  -2   1  211.10    1.83
   0  -3   0   42.46    0.79
   4  -1  -1  145.33    1.90
   4  -1  -1  133.27    1.65
   1  -4  -1  132.61    1.78
   1  -4  -1  126.11    1.71
   5  -2  -2   57.61    1.72
   5  -2  -2   63.69    1.74
   2  -5  -2 1281.30    6.83
   2  -5  -2 1280.73    7.07
  -3   6   3   39.31    1.96
   6  -3  -3  144.46    3.00
   6  -3  -3  162.14    3.19
   3  -6  -3   33.83    1.72
   3  -6  -3   32.95    1.74
  -4   7   4  902.34    8.40
   7  -4  -4   17.14    1.88
   7  -4  -4   19.83    2.07
   4  -7  -4  829.83    7.67
   4  -7  -4  882.30    8.29
  -5   8   5  135.09    4.07
  -8   5   5   11.56    1.79
   8  -5  -5   13.22    1.87
   8  -5  -5   12.94    1.87
   5  -8  -5  119.36    3.57
   5  -8  -5  127.72    3.97
  -6   9   6    7.18    1.89
  -9   6   6  535.24    8.30
   9  -6  -6  464.09    7.53
   9  -6  -6  534.37    8.23
   6  -9  -6    5.55    1.87
   6  -9  -6    4.76    1.91
  -7  10   7  106.44    4.68
 -10   7   7    0.78    2.11
  10  -7  -7   -2.77    1.92
  10  -7  -7    0.98    2.09
   7 -10  -7   98.87    4.20
   7 -10  -7  110.10    4.82
  -8  11   8   19.90    3.27
 -11   8   8  114.84    5.27
  11  -8  -8   99.37    5.11
  11  -8  -8  109.43    5.38
   8 -11  -8   14.57    2.92
   8 -11  -8   23.59    3.55
  -9  12   9    6.78    3.14
  -9  12   9    4.20    3.16
 -12   9   9  118.00    6.30
  12  -9  -9   96.49    5.28
  12  -9  -9  107.58    6.49
   9 -12  -9    6.21    2.67
   9 -12  -9    5.07    3.03
 -10  13  10   83.72    6.20
 -13  10  10   11.27    4.08
  13 -10 -10    9.59    3.58
  13 -10 -10   13.31    3.85
  10 -13 -10   90.10    6.14
  10 -13 -10   94.98    6.34
 -11  14  11    2.52    3.84
 -14  11  11   -0.40    4.14
  14 -11 -11   -0.95    3.52
  14 -11 -11   -0.92    4.08
  11 -14 -11    4.29    3.71
  11 -14 -11    3.01    3.77
  12  -7 -11   61.12    5.50
  12  -7 -11   63.60    6.33
   7 -12 -11   16.48    3.82
   7 -12 -11   21.90    4.84
  -7  12  11   22.81    4.90
  11  -6 -10   26.02    4.01
  11  -6 -10   31.29    4.40
   6 -11 -10   40.91    4.89
   6 -11 -10   49.50    6.04
  10  -5  -9   81.62    5.19
  10  -5  -9  101.11    6.22
   5 -10  -9    0.59    2.49
   5 -10  -9    2.36    2.76
  -5  10   9    1.72    2.65
 -10   5   9  102.49    5.95
   9  -4  -8  244.97    6.75
   9  -4  -8  287.49    7.75
   4  -9  -8   88.37    4.55
   4  -9  -8   98.12    5.08
  -4   9   8  107.68    5.60
  -9   4   8  297.43    7.68
   8  -3  -7   50.19    3.33
   8  -3  -7   62.11    4.25
   3  -8  -7   35.39    3.19
   3  -8  -7   34.28    3.83
  -3   8   7   34.73    3.53
  -8   3   7   63.53    3.87
   7  -2  -6   59.29    3.31
   7  -2  -6   66.37    3.51
   2  -7  -6  132.99    4.07
   2  -7  -6  148.14    4.64
  -2   7   6  154.61    4.97
  -7   2   6   72.59    3.75
   6  -1  -5   77.54    3.00
   6  -1  -5   86.92    3.33
   1  -6  -5   76.61    2.88
   1  -6  -5   78.59    3.21
  -1   6   5   87.44    3.41
  -6   1   5   90.85    3.52
   5   0  -4   20.63    1.85
   5   0  -4   22.35    1.89
   0  -5  -4   23.50    1.70
   0  -5  -4   24.50    1.86
   0   5   4   22.34    1.96
  -5   0   4   24.47    2.04
   4   1  -3    6.28    0.97
   4   1  -3    7.09    1.10
  -1  -4  -3  368.51    4.01
  -1  -4  -3  372.28    4.51
   1   4   3  408.47    4.83
  -4  -1   3    7.28    1.05
   3   2  -2 1143.43    6.68
   3   2  -2 1278.74    6.81
  -2  -3  -2   62.02    1.43
  -2  -3  -2   61.79    1.61
  -2  -3  -2   69.30    1.78
   2   3   2   69.31    1.82
  -3  -2   2 1371.06    6.70
   2   3  -1   29.06    1.03
   2   3  -1   30.81    0.91
  -3  -2  -1  813.95    3.58
  -3  -2  -1  802.94    3.53
  -3  -2  -1  824.28    4.16
   3   2   1  823.77    4.17
  -2  -3   1   36.83    0.82
   1   4   0   49.58    1.08
   4   1   0  163.08    1.66
  -1  -4   0   54.32    1.12
   0   5   1   97.96    1.58
   0   5   1  124.49    1.67
   5   0  -1  107.42    1.82
   5   0  -1  113.61    1.56
   0  -5  -1  108.83    1.78
   0  -5  -1   98.29    1.59
  -1   6   2  731.00    5.44
  -1   6   2  804.72    5.62
   6  -1  -2  474.66    4.61
   6  -1  -2  515.75    4.45
   1  -6  -2  752.97    5.39
   1  -6  -2  744.66    5.49
  -2   7   3   22.32    1.72
   7  -2  -3  111.01    2.76
   7  -2  -3  129.24    2.96
   2  -7  -3   15.61    1.45
   2  -7  -3   18.09    1.63
  -3   8   4  590.89    6.87
   8  -3  -4   84.07    2.86
   8  -3  -4   87.50    3.07
   3  -8  -4  537.64    6.25
   3  -8  -4  567.96    6.73
  -4   9   5   28.62    2.52
  -9   4   5   29.09    2.70
   9  -4  -5   23.36    2.46
   9  -4  -5   27.39    2.74
   4  -9  -5   19.73    2.06
   4  -9  -5   21.39    2.37
  -5  10   6  172.46    5.25
 -10   5   6   16.67    2.42
  10  -5  -6   13.97    2.12
  10  -5  -6   18.53    2.59
   5 -10  -6  163.10    4.56
   5 -10  -6  174.77    5.28
  -6  11   7    8.80    2.52
 -11   6   7  295.56    7.08
  11  -6  -7  258.29    6.37
  11  -6  -7  297.27    7.02
   6 -11  -7    7.34    2.28
   6 -11  -7    7.04    2.38
  -7  12   8   74.65    4.84
  -7  12   8   84.00    4.88
 -12   7   8    4.00    2.64
  12  -7  -8   -0.36    2.41
  12  -7  -8    3.50    2.90
   7 -12  -8   73.32    4.63
   7 -12  -8   78.41    4.87
  -8  13   9   32.39    4.11
  -8  13   9   35.99    4.43
 -13   8   9   21.15    3.48
  13  -8  -9   29.24    3.92
  13  -8  -9   24.20    3.82
   8 -13  -9   30.33    3.85
   8 -13  -9   30.38    4.05
  -9  14  10   27.64    4.36
 -14   9  10    6.08    3.92
  14  -9 -10    4.54    3.39
  14  -9 -10    8.26    4.03
   9 -14 -10   23.81    3.96
   9 -14 -10   23.86    4.19
 -10  15  11    9.84    4.14
 -15  10  11   -2.03    3.68
  15 -10 -11    2.50    3.65
  15 -10 -11   -1.95    3.60
  10 -15 -11   10.07    3.81
  10 -15 -11    5.63    3.94
  13  -6 -11    0.99    3.52
  13  -6 -11   -1.38    3.53
   6 -13 -11   11.23    4.52
  -6  13  11   17.21    4.72
  12  -5 -10  151.27    6.94
  12  -5 -10  186.95    8.14
   5 -12 -10   32.47    4.01
   5 -12 -10   31.84    4.35
  -5  12  10   28.55    4.29
  11  -4  -9   18.13    3.13
  11  -4  -9   21.26    3.63
   4 -11  -9   22.92    3.20
   4 -11  -9   20.21    3.52
  -4  11   9   25.36    3.87
 -11   4   9   27.37    3.78
  10  -3  -8   66.16    4.45
  10  -3  -8   81.89    4.86
   3 -10  -8   12.86    2.63
   3 -10  -8   10.96    3.04
  -3  10   8   18.19    3.27
 -10   3   8   80.97    4.66
   9  -2  -7    4.23    2.14
   9  -2  -7    3.24    2.14
   2  -9  -7  136.72    4.62
   2  -9  -7  144.14    5.14
  -2   9   7  161.50    5.71
  -9   2   7    7.46    2.32
   8  -1  -6   41.68    2.87
   8  -1  -6   43.55    3.13
   1  -8  -6   55.72    3.08
   1  -8  -6   63.61    3.48
  -1   8   6   65.14    3.60
  -8   1   6   47.02    3.13
   7   0  -5    0.12    1.36
   7   0  -5    0.64    1.37
   0  -7  -5   -0.88    1.12
   0  -7  -5   -0.02    1.43
   0   7   5   -1.31    1.31
  -7   0   5   -0.58    1.35
   6   1  -4    3.96    1.15
   6   1  -4    1.68    1.13
  -1  -6  -4  161.40    3.31
  -1  -6  -4  159.52    3.61
   1   6   4  177.46    3.92
  -6  -1   4    4.30    1.22
   5   2  -3   17.81    1.45
   5   2  -3   20.71    1.60
  -2  -5  -3  121.62    2.47
  -2  -5  -3  123.61    2.76
   2   5   3  138.21    3.07
  -5  -2   3   20.58    1.53
   4   3  -2  862.59    6.25
   4   3  -2  979.11    6.08
  -3  -4  -2  125.80    2.06
  -3  -4  -2  127.95    2.19
  -3  -4  -2  139.35    2.44
   3   4   2  143.20    2.51
  -4  -3   2 1019.94    5.76
   3   4  -1  739.84    5.02
   3   4  -1  825.72    4.31
  -4  -3  -1 1021.55    4.72
  -4  -3  -1  993.81    3.95
  -4  -3  -1 1031.86    4.86
   4   3   1 1018.57    4.71
   4   3   1 1046.56    4.92
   2   5   0  248.04    2.71
   2   5   0  118.54    1.40
   5   2   0   60.49    1.29
   1   6   1  896.12    4.75
   1   6   1 1180.64    5.02
   6   1  -1  293.64    3.21
   6   1  -1  337.69    2.63
  -1  -6  -1 1076.89    5.83
  -1  -6  -1  898.42    4.75
   0   7   2  654.35    5.20
   0   7   2  756.07    5.51
   7   0  -2  639.72    5.59
   7   0  -2  728.76    5.30
   0  -7  -2  703.59    5.43
   0  -7  -2  669.92    5.26
  -1   8   3  113.04    2.78
  -1   8   3  128.79    3.03
   8  -1  -3   42.61    2.10
   8  -1  -3   46.32    2.04
   1  -8  -3  115.44    2.79
   1  -8  -3  112.62    2.78
  -2   9   4  107.05    3.22
  -2   9   4  119.43    3.39
   9  -2  -4    0.93    1.10
   9  -2  -4   -0.19    1.21
   2  -9  -4  109.42    3.16
   2  -9  -4  111.84    3.28
  -3  10   5  235.30    5.15
 -10   3   5  297.39    5.73
  10  -3  -5  256.23    5.42
  10  -3  -5  294.66    5.63
   3 -10  -5  208.11    4.65
   3 -10  -5  217.22    5.09
  -4  11   6   27.32    2.96
  -4  11   6   29.51    3.34
 -11   4   6    1.91    1.85
  11  -4  -6    0.09    1.59
  11  -4  -6    0.97    1.78
   4 -11  -6   26.91    2.89
   4 -11  -6   28.27    2.99
  -5  12   7   20.07    2.86
  -5  12   7   24.51    3.13
 -12   5   7   42.61    3.89
  12  -5  -7   34.21    3.67
  12  -5  -7   41.46    4.11
   5 -12  -7   19.61    2.71
   5 -12  -7   20.75    2.86
  -6  13   8   20.38    3.52
  -6  13   8   21.00    3.36
 -13   6   8  111.30    5.58
  13  -6  -8   96.81    5.28
  13  -6  -8  118.62    5.56
   6 -13  -8   16.78    2.74
   6 -13  -8   17.22    3.39
  -7  14   9    0.65    3.18
  -7  14   9    3.61    3.20
 -14   7   9   77.12    5.18
  14  -7  -9   66.33    5.37
  14  -7  -9   76.39    6.04
   7 -14  -9   -0.62    2.73
   7 -14  -9    2.18    2.88
  -8  15  10   97.44    6.47
  15  -8 -10    4.65    3.13
  15  -8 -10    8.00    4.03
   8 -15 -10   98.37    6.21
   8 -15 -10   89.02    6.26
  -9  16  11   18.79    4.49
 -16   9  11   43.77    5.44
  16  -9 -11   47.08    5.40
  16  -9 -11   47.61    5.55
   9 -16 -11   25.33    4.42
   9 -16 -11   21.36    4.52
  14  -5 -11   -1.77    2.92
  14  -5 -11   -1.85    3.98
   5 -14 -11    1.07    3.57
  -5  14  11    0.16    3.59
  13  -4 -10   -1.29    3.03
  13  -4 -10    0.69    3.63
   4 -13 -10   30.91    3.86
   4 -13 -10   33.93    4.74
  -4  13  10   33.16    4.76
  12  -3  -9   14.93    3.08
  12  -3  -9   20.84    3.64
   3 -12  -9    5.09    2.74
   3 -12  -9    2.54    3.10
  -3  12   9    5.91    3.29
  -3  12   9    6.76    3.20
 -12   3   9   21.34    3.34
  11  -2  -8   -2.53    1.94
  11  -2  -8   -0.48    2.41
   2 -11  -8   41.60    3.78
   2 -11  -8   47.91    4.22
  -2  11   8   46.23    4.25
 -11   2   8   -1.91    2.23
  10  -1  -7    3.24    2.16
  10  -1  -7    6.40    2.52
   1 -10  -7    9.00    2.14
   1 -10  -7   11.14    2.63
  -1  10   7    7.29    2.28
 -10   1   7    4.28    2.22
   9   0  -6   18.18    2.43
   9   0  -6   21.50    2.66
   0  -9  -6   20.17    2.49
   0  -9  -6   17.16    2.42
   0   9   6   24.13    2.76
  -9   0   6   20.78    2.42
   8   1  -5    7.18    1.76
   8   1  -5    8.75    1.75
  -1  -8  -5  403.79    5.75
  -1  -8  -5  410.47    6.46
   1   8   5  439.18    6.86
  -8  -1   5    7.36    1.54
   7   2  -4  103.06    3.19
   7   2  -4  115.36    3.37
  -2  -7  -4    0.88    0.98
  -2  -7  -4    0.62    1.13
   2   7   4    0.78    1.30
  -7  -2   4  116.33    3.13
   6   3  -3   61.88    2.29
   6   3  -3   70.16    2.33
  -3  -6  -3  120.38    2.55
  -3  -6  -3  116.98    2.71
   3   6   3  134.51    3.07
  -6  -3   3   71.85    2.22
   5   4  -2    1.62    0.78
   5   4  -2    1.03    0.67
  -4  -5  -2  138.24    2.34
  -4  -5  -2  135.67    2.26
  -4  -5  -2  151.61    2.61
   4   5   2  156.34    2.66
   4   5  -1 1041.91    6.54
   4   5  -1 1162.16    5.33
  -5  -4  -1  226.51    2.64
  -5  -4  -1  225.17    1.96
  -5  -4  -1  249.42    2.55
   5   4   1  233.05    2.67
   5   4   1  222.18    1.95
   5   4   1  242.99    2.55
   3   6   0  144.76    2.37
   3   6   0   77.23    1.29
   6   3   0  967.21    5.49
   6   3   0 1115.71    4.18
  -3  -6   0  142.79    0.89
   2   7   1 1215.11    6.78
   2   7   1  901.77    4.93
   2   7   1 1342.11    7.13
   7   2  -1  105.24    2.25
   7   2  -1  124.33    1.67
  -2  -7  -1 1231.60    6.83
  -2  -7  -1  913.44    4.97
   1   8   2  239.48    3.29
   1   8   2  289.88    3.56
   8   1  -2 1926.90   10.16
   8   1  -2 2270.27    9.96
  -1  -8  -2  249.40    3.48
  -1  -8  -2  240.71    3.30
   0   9   3  188.96    3.59
   0   9   3  221.61    3.86
   9   0  -3  189.96    3.81
   9   0  -3  208.12    3.66
   0  -9  -3  201.53    3.62
   0  -9  -3  192.10    3.61
  -1  10   4  990.04    8.93
  -1  10   4 1102.55    9.42
  10  -1  -4  161.70    4.12
  10  -1  -4  176.84    3.94
   1 -10  -4 1017.63    8.64
   1 -10  -4 1011.70    8.97
  -2  11   5  737.14    8.68
  -2  11   5  830.54    9.30
  11  -2  -5   64.07    3.37
  11  -2  -5   73.01    3.45
   2 -11  -5  769.40    8.45
   2 -11  -5  756.34    8.79
  -3  12   6   37.08    3.14
  -3  12   6   44.10    3.60
 -12   3   6   13.80    2.31
  12  -3  -6   10.64    2.30
  12  -3  -6   12.65    2.24
   3 -12  -6   38.01    3.11
   3 -12  -6   33.31    3.08
  -4  13   7    6.85    2.63
  -4  13   7    8.32    2.50
 -13   4   7    0.76    1.87
  13  -4  -7    1.64    1.99
  13  -4  -7    1.12    2.14
   4 -13  -7    5.36    2.22
   4 -13  -7    5.72    2.58
  -5  14   8   13.02    3.22
  -5  14   8   13.73    3.16
 -14   5   8  137.27    5.92
  14  -5  -8  109.53    5.55
  14  -5  -8  125.41    5.69
   5 -14  -8   11.78    2.77
   5 -14  -8   12.27    3.18
  -6  15   9   13.94    3.78
  -6  15   9   11.96    5.31
 -15   6   9    2.93    2.89
  15  -6  -9    4.10    3.10
  15  -6  -9    0.97    3.32
   6 -15  -9   10.36    3.16
   6 -15  -9   11.59    3.62
  -7  16  10    2.83    3.79
  16  -7 -10   39.33    4.82
  16  -7 -10   55.57    6.50
   7 -16 -10   -1.22    3.14
   7 -16 -10    2.64    3.73
  -8  17  11   -0.10    3.69
 -17   8  11   46.29    5.86
  17  -8 -11   37.71    5.10
  17  -8 -11   43.96    5.76
   8 -17 -11   -1.40    3.49
   8 -17 -11   -0.56    3.58
  15  -4 -11   -2.47    2.98
  15  -4 -11    1.25    4.19
   4 -15 -11    2.92    4.06
  -4  15  11    3.49    4.17
  14  -3 -10   12.14    3.70
  14  -3 -10   15.45    3.88
   3 -14 -10    3.17    3.62
  -3  14  10   -3.66    3.45
  13  -2  -9   91.77    5.69
  13  -2  -9  112.26    5.98
   2 -13  -9  199.68    6.57
   2 -13  -9  207.61    7.58
  -2  13   9  199.97    7.51
  -2  13   9  221.46    7.87
 -13   2   9  117.20    6.14
  12  -1  -8    2.76    2.27
  12  -1  -8    4.42    2.63
   1 -12  -8   72.94    4.37
   1 -12  -8   73.87    5.11
  -1  12   8   72.07    5.06
  -1  12   8   77.45    4.86
 -12   1   8    6.46    2.68
  11   0  -7   74.45    4.07
  11   0  -7   88.84    4.75
   0 -11  -7   82.20    3.95
   0 -11  -7   83.58    4.58
   0  11   7   92.35    4.89
 -11   0   7   77.26    4.38
  10   1  -6    1.72    1.67
  10   1  -6    0.05    1.87
  -1 -10  -6    7.63    1.86
  -1 -10  -6    5.41    1.86
   1  10   6    8.53    2.28
 -10  -1   6    0.17    1.68
   9   2  -5  686.71    8.54
   9   2  -5  802.48    8.89
  -2  -9  -5   70.30    2.89
  -2  -9  -5   72.83    3.31
   2   9   5   80.30    3.44
  -9  -2   5  803.65    8.67
   8   3  -4  255.01    4.91
   8   3  -4  298.09    5.04
  -3  -8  -4   27.31    1.90
  -3  -8  -4   26.90    1.94
   3   8   4   29.75    2.21
  -8  -3   4  297.41    4.79
   7   4  -3  733.69    7.28
   7   4  -3  846.89    7.03
  -4  -7  -3   14.81    1.42
  -4  -7  -3   14.03    1.41
   4   7   3   14.57    1.67
  -7  -4   3  861.66    6.65
   6   5  -2   40.60    1.87
   6   5  -2   45.99    1.64
  -5  -6  -2  101.38    2.22
  -5  -6  -2   96.52    2.00
  -5  -6  -2  105.53    2.30
   5   6   2   95.73    1.99
   5   6   2  105.88    2.36
   5   6  -1   10.04    1.17
   5   6  -1   10.64    0.87
  -6  -5  -1  455.14    2.81
  -6  -5  -1  555.13    3.90
   6   5   1  535.55    4.43
   6   5   1  456.97    2.81
   6   5   1  527.90    3.84
   4   7   0   25.46    1.39
   4   7   0   15.32    0.88
   7   4   0  380.09    3.88
   7   4   0  419.87    1.76
  -4  -7   0   29.25    0.55
   3   8   1  155.13    2.82
   3   8   1   98.39    1.80
   3   8   1  183.58    2.15
   8   3  -1    2.09    0.85
   8   3  -1    1.51    0.47
  -3  -8  -1  157.34    2.84
  -3  -8  -1  103.68    1.84
  -3  -8  -1  179.01    2.10
   2   9   2   27.00    1.43
   2   9   2   33.26    1.60
   9   2  -2   11.22    1.40
   9   2  -2   10.44    1.20
  -2  -9  -2   30.56    1.72
  -2  -9  -2   25.88    1.42
   1  10   3   13.78    1.58
   1  10   3   14.00    1.66
  10   1  -3   38.07    2.31
  10   1  -3   40.86    1.99
  -1 -10  -3   15.54    1.66
  -1 -10  -3   14.31    1.60
   0  11   4  387.86    5.78
   0  11   4  440.72    6.15
  11   0  -4  375.71    6.12
  11   0  -4  414.20    5.88
   0 -11  -4  394.94    5.59
   0 -11  -4  397.67    5.85
  -1  12   5    6.50    1.66
  -1  12   5    7.33    1.85
  12  -1  -5    8.13    1.82
  12  -1  -5   10.13    1.93
   1 -12  -5    6.27    1.73
   1 -12  -5    6.71    1.68
  -2  13   6   68.91    4.00
  -2  13   6   79.00    4.18
 -13   2   6   52.47    3.53
  13  -2  -6   45.82    3.35
  13  -2  -6   52.07    3.44
   2 -13  -6   67.51    3.40
   2 -13  -6   65.24    3.98
  -3  14   7   56.60    4.01
  -3  14   7   65.53    4.54
 -14   3   7   48.84    4.02
  14  -3  -7   43.78    4.04
  14  -3  -7   49.02    3.91
   3 -14  -7   61.12    3.70
   3 -14  -7   58.11    4.05
  -4  15   8    3.80    2.60
  -4  15   8    2.67    2.77
 -15   4   8   43.46    4.46
  15  -4  -8   37.97    4.47
  15  -4  -8   47.83    4.44
   4 -15  -8    0.11    2.43
   4 -15  -8    1.57    2.47
  -5  16   9  117.89    6.65
 -16   5   9    2.95    2.95
  16  -5  -9    1.36    2.70
  16  -5  -9    1.48    2.94
   5 -16  -9  115.83    5.92
   5 -16  -9  135.68    6.86
  -6  17  10   38.75    4.76
  17  -6 -10    0.08    3.35
  17  -6 -10   -0.99    3.74
   6 -17 -10   35.74    4.33
   6 -17 -10   37.52    4.93
  16  -3 -11    4.71    3.42
  16  -3 -11    7.00    3.95
   3 -16 -11   15.68    4.15
  -3  16  11   12.84    4.13
  15  -2 -10    6.86    3.57
  15  -2 -10    5.53    3.83
   2 -15 -10   29.12    4.62
  -2  15  10   33.85    4.91
  14  -1  -9    4.59    2.75
  14  -1  -9    9.73    3.51
   1 -14  -9   64.54    5.00
   1 -14  -9   61.11    5.03
  -1  14   9   66.46    5.13
  -1  14   9   76.08    6.86
 -14   1   9    5.04    2.66
  13   0  -8    4.74    2.71
  13   0  -8    6.33    2.73
   0 -13  -8    7.68    2.49
   0 -13  -8    6.43    2.56
   0  13   8    5.68    2.60
   0  13   8    7.08    2.89
 -13   0   8    3.99    2.31
  12   1  -7    2.89    2.09
  12   1  -7    4.21    2.51
  -1 -12  -7  349.97    6.81
  -1 -12  -7  352.54    7.62
   1  12   7  342.49    7.53
   1  12   7  382.89    8.06
 -12  -1   7    4.78    2.10
  11   2  -6   64.01    3.90
  11   2  -6   74.01    4.00
  -2 -11  -6   53.00    3.15
  -2 -11  -6   51.31    3.54
   2  11   6   57.66    3.92
 -11  -2   6   70.71    3.50
  10   3  -5    0.18    1.65
  10   3  -5    0.15    1.41
  -3 -10  -5  348.01    5.56
  -3 -10  -5  343.78    5.87
   3  10   5  388.43    6.57
 -10  -3   5    0.55    1.36
   9   4  -4   50.90    2.73
   9   4  -4   57.01    2.70
  -4  -9  -4  116.18    3.15
  -4  -9  -4  112.98    3.28
   4   9   4  112.74    3.26
   4   9   4  123.71    3.64
  -9  -4   4   55.42    2.60
   8   5  -3  183.85    4.01
   8   5  -3  204.54    3.68
  -5  -8  -3   56.51    2.14
  -5  -8  -3   52.85    2.03
   5   8   3   53.58    2.04
   5   8   3   57.97    2.34
  -8  -5   3  208.59    3.41
   7   6  -2    2.85    1.02
   7   6  -2    4.40    0.87
  -6  -7  -2   79.93    2.20
  -6  -7  -2   74.16    1.82
  -6  -7  -2   82.45    2.08
   6   7   2   77.55    2.17
   6   7   2   72.80    1.80
   6   7   2   85.61    2.24
   6   7  -1   25.82    1.65
   6   7  -1   29.80    1.22
  -7  -6  -1    0.44    0.41
  -7  -6  -1    0.68    0.52
   7   6   1    1.02    0.83
   7   6   1   -0.26    0.37
   7   6   1    1.75    0.63
   5   8   0  726.57    6.15
   5   8   0  475.59    3.42
   8   5   0  147.24    2.82
   8   5   0  161.78    1.29
  -5  -8   0  871.38    3.26
   4   9   1   60.42    2.14
   4   9   1   31.24    1.21
   4   9   1   69.06    1.48
   9   4  -1  403.65    4.83
   9   4  -1  474.02    3.29
  -4  -9  -1   60.25    2.12
  -4  -9  -1   34.56    1.26
  -4  -9  -1   70.59    1.45
   3  10   2    0.23    0.66
   3  10   2    1.52    0.80
  10   3  -2   37.57    2.01
  10   3  -2   40.94    1.61
  -3 -10  -2    0.30    0.91
  -3 -10  -2    0.30    0.69
   2  11   3  278.39    4.33
   2  11   3  325.09    4.69
  11   2  -3 1436.21   10.78
  11   2  -3 1645.93    9.82
  -2 -11  -3  288.83    4.52
  -2 -11  -3  273.26    4.29
   1  12   4  102.25    3.22
   1  12   4  114.60    3.58
  12   1  -4  943.84    9.71
  12   1  -4 1107.44    9.37
  -1 -12  -4  104.33    3.22
  -1 -12  -4   97.32    3.29
   0  13   5   49.71    2.91
   0  13   5   63.22    3.43
  13   0  -5   48.13    3.36
  13   0  -5   57.61    3.27
   0 -13  -5   48.67    2.97
   0 -13  -5   49.84    2.92
  -1  14   6  330.08    6.89
  -1  14   6  365.95    7.27
 -14   1   6  278.29    6.27
  14  -1  -6  248.37    6.39
  14  -1  -6  288.31    6.30
   1 -14  -6  327.54    6.47
   1 -14  -6  332.47    6.91
  -2  15   7   11.96    2.57
  -2  15   7   12.92    2.58
 -15   2   7    8.79    2.50
  15  -2  -7    8.14    2.44
  15  -2  -7    8.19    2.47
   2 -15  -7   12.34    2.60
   2 -15  -7   15.06    2.68
  -3  16   8   51.65    4.94
  -3  16   8   51.58    4.99
 -16   3   8   -0.36    2.11
  16  -3  -8    0.86    2.39
  16  -3  -8   -2.17    2.43
   3 -16  -8   52.39    4.41
   3 -16  -8   45.75    4.85
  -4  17   9   45.86    4.83
 -17   4   9    4.18    2.95
  17  -4  -9    2.30    2.78
  17  -4  -9    1.34    2.95
   4 -17  -9   46.52    4.82
   4 -17  -9   47.78    4.89
  -5  18  10   64.81    5.93
  18  -5 -10  103.75    6.89
  18  -5 -10  121.25    6.93
   5 -18 -10   69.76    5.83
   5 -18 -10   72.78    6.00
  16  -1 -10   17.44    3.98
  16  -1 -10   19.24    4.07
   1 -16 -10   11.70    4.00
  -1  16  10   10.29    3.97
  15   0  -9    0.60    2.90
  15   0  -9    0.26    2.81
   0 -15  -9   -0.10    2.98
   0 -15  -9   -1.30    2.97
   0  15   9    1.20    3.13
 -15   0   9    0.98    2.74
  14   1  -8   34.24    3.89
  14   1  -8   39.77    4.69
  -1 -14  -8  103.14    4.85
  -1 -14  -8   98.02    5.42
   1  14   8  110.02    5.61
   1  14   8  113.24    5.94
 -14  -1   8   40.52    4.25
  13   2  -7   11.21    2.81
  13   2  -7   13.40    2.60
  -2 -13  -7    7.34    2.19
  -2 -13  -7   11.29    2.43
   2  13   7    9.48    2.55
   2  13   7   10.01    2.79
 -13  -2   7   12.60    2.53
  12   3  -6  611.23    9.27
  12   3  -6  700.99    9.49
  -3 -12  -6   72.53    3.59
  -3 -12  -6   73.65    3.89
   3  12   6   70.51    3.83
   3  12   6   74.94    4.17
 -12  -3   6  685.96    9.01
  11   4  -5   33.12    2.86
  11   4  -5   38.69    2.97
  -4 -11  -5  155.90    4.08
  -4 -11  -5  150.31    4.25
   4  11   5  143.36    4.17
   4  11   5  171.91    4.74
 -11  -4   5   36.69    2.69
  10   5  -4   46.14    3.01
  10   5  -4   47.86    2.62
  -5 -10  -4    9.23    1.52
  -5 -10  -4   10.73    1.53
   5  10   4    9.22    1.48
   5  10   4    8.59    1.58
 -10  -5   4   47.49    2.39
   9   6  -3   53.09    2.79
   9   6  -3   52.52    2.23
  -6  -9  -3   38.12    2.03
  -6  -9  -3   35.26    1.81
   6   9   3   35.11    1.79
   6   9   3   41.54    2.27
   8   7  -2  137.83    3.43
   8   7  -2  150.79    2.77
  -7  -8  -2  468.22    5.07
  -7  -8  -2  420.86    3.94
  -7  -8  -2  509.49    4.85
   7   8   2  461.01    5.03
   7   8   2  417.28    3.92
   7   8   2  508.71    4.91
   7   8  -1   17.73    1.65
   7   8  -1   19.43    1.16
  -8  -7  -1   36.60    1.33
   8   7   1   33.60    1.79
   8   7   1   16.67    0.77
   8   7   1   30.43    1.33
   6   9   0  675.37    6.38
   6   9   0  476.70    3.60
  -9  -6   0   95.35    1.65
   9   6   0  121.74    2.85
   9   6   0  125.90    1.28
  -6  -9   0  812.52    2.93
   5  10   1  172.93    3.45
   5  10   1   77.01    1.73
   5  10   1  189.08    2.32
  10   5  -1    6.28    1.24
  10   5  -1    7.62    0.84
  -5 -10  -1  172.93    3.42
  -5 -10  -1  194.39    2.31
   4  11   2  194.85    3.75
   4  11   2  147.25    2.77
   4  11   2  220.20    3.27
  11   4  -2  622.78    6.84
  11   4  -2  714.98    5.44
  -4 -11  -2  193.40    3.75
  -4 -11  -2  150.05    2.81
   3  12   3  219.00    3.92
   3  12   3  284.03    4.40
  12   3  -3  440.47    6.36
  12   3  -3  510.32    5.61
  -3 -12  -3  246.78    4.47
  -3 -12  -3  223.67    3.95
   2  13   4   18.10    2.15
   2  13   4   25.32    2.39
  13   2  -4  628.72    8.20
  13   2  -4  732.00    7.73
  -2 -13  -4   20.80    2.32
  -2 -13  -4   22.73    2.23
   1  14   5    8.82    1.95
   1  14   5    8.90    2.03
  14   1  -5  509.33    8.20
  14   1  -5  579.16    7.85
  -1 -14  -5    6.04    1.75
  -1 -14  -5    7.17    1.91
   0  15   6   27.56    3.31
   0  15   6   28.51    3.47
 -15   0   6   21.87    2.47
  15   0  -6   23.46    2.82
  15   0  -6   27.09    2.92
   0 -15  -6   25.96    3.05
   0 -15  -6   26.17    2.93
  -1  16   7   19.83    2.90
  -1  16   7   25.73    3.27
 -16   1   7  101.98    4.84
  16  -1  -7   95.60    5.19
  16  -1  -7  113.52    5.27
   1 -16  -7   24.81    2.94
   1 -16  -7   23.30    3.12
  -2  17   8   13.39    3.04
  -2  17   8   18.06    3.32
 -17   2   8    0.15    2.42
  17  -2  -8    0.83    2.47
  17  -2  -8   -0.86    2.82
   2 -17  -8   15.23    2.95
   2 -17  -8   16.07    3.07
  -3  18   9   36.29    4.47
 -18   3   9    5.94    3.02
  18  -3  -9    8.88    3.19
  18  -3  -9    4.72    3.39
   3 -18  -9   41.15    4.80
   3 -18  -9   35.23    4.40
  -4  19  10   19.89    4.10
  19  -4 -10    1.98    3.24
  19  -4 -10    4.42    3.83
   4 -19 -10   24.97    6.40
   4 -19 -10   19.08    4.00
  17   0 -10   15.50    3.92
  17   0 -10   21.11    4.51
   0 -17 -10   16.84    3.79
   0  17  10   16.42    4.06
  16   1  -9   16.56    3.69
  16   1  -9   23.80    4.11
  -1 -16  -9   10.47    3.38
   1  16   9    4.23    2.91
 -16  -1   9   24.00    3.60
  15   2  -8   14.64    3.30
  15   2  -8   18.21    3.50
  -2 -15  -8    0.45    2.27
  -2 -15  -8   -0.17    2.26
   2  15   8    0.61    2.33
   2  15   8    0.33    2.64
 -15  -2   8   14.30    2.85
  14   3  -7   71.55    4.45
  14   3  -7   88.32    4.88
  -3 -14  -7    2.21    2.10
  -3 -14  -7    0.93    2.28
   3  14   7    0.36    2.28
   3  14   7   -0.79    2.45
 -14  -3   7   91.50    4.57
  13   4  -6  100.76    4.52
  13   4  -6  118.27    4.66
  -4 -13  -6    6.30    1.99
  -4 -13  -6    5.81    2.03
   4  13   6    5.11    2.00
   4  13   6    5.10    2.25
 -13  -4   6  113.16    4.30
  12   5  -5   14.08    2.25
  12   5  -5   18.63    2.33
  -5 -12  -5   64.17    3.15
  -5 -12  -5   59.43    3.19
   5  12   5   60.20    3.20
   5  12   5   67.99    3.59
 -12  -5   5   17.11    2.03
  11   6  -4   95.41    3.74
  11   6  -4  109.30    3.47
  -6 -11  -4  153.68    3.81
  -6 -11  -4  148.60    3.74
   6  11   4  150.73    3.75
   6  11   4  174.41    4.22
 -11  -6   4  108.87    3.22
  10   7  -3   25.84    2.30
  10   7  -3   30.39    2.04
  -7 -10  -3  685.69    6.83
  -7 -10  -3  623.03    5.93
   7  10   3  687.74    6.83
   7  10   3  629.17    5.96
   7  10   3  740.12    7.01
   9   8  -2   11.48    1.58
   9   8  -2   13.63    1.38
  -8  -9  -2  130.93    3.09
  -8  -9  -2  109.70    2.16
  -8  -9  -2  151.14    3.02
   8   9   2  133.62    3.13
   8   9   2  109.42    2.16
   8   9   2  140.55    2.84
   8   9  -1  389.87    5.45
   8   9  -1  419.33    3.82
  -9  -8  -1   49.74    1.54
   9   8   1   45.19    2.10
   9   8   1   19.61    0.84
   7  10   0  414.76    5.40
   7  10   0  300.50    3.03
 -10  -7   0  409.41    3.36
  10   7   0  472.92    5.56
  10   7   0  514.16    2.62
  -7 -10   0  492.41    2.46
   6  11   1   38.41    2.21
   6  11   1   16.93    1.07
   6  11   1   41.66    1.35
  11   6  -1  102.60    3.10
  11   6  -1  112.78    1.82
  -6 -11  -1   47.15    1.36
   5  12   2  186.80    3.92
   5  12   2  135.88    2.72
   5  12   2  217.18    3.30
  12   5  -2   39.35    2.52
  12   5  -2   42.30    1.75
  -5 -12  -2  194.58    3.99
  -5 -12  -2  141.86    2.80
   4  13   3   90.32    2.73
   4  13   3  116.26    3.14
  13   4  -3  154.58    4.32
  13   4  -3  180.15    3.59
  -4 -13  -3  105.16    3.35
  -4 -13  -3   89.60    2.73
   3  14   4    6.32    1.54
   3  14   4    7.22    1.66
  14   3  -4   70.02    3.41
  14   3  -4   79.19    3.09
  -3 -14  -4    5.52    1.62
  -3 -14  -4    6.43    1.58
   2  15   5   10.33    2.05
   2  15   5    8.64    1.99
  15   2  -5   49.86    3.46
  15   2  -5   53.60    3.29
  -2 -15  -5    8.08    1.92
  -2 -15  -5    7.72    1.94
   1  16   6   28.31    3.36
   1  16   6   31.40    3.50
 -16  -1   6   30.19    3.18
  16   1  -6   25.22    2.98
  16   1  -6   34.69    3.15
  -1 -16  -6   29.78    3.30
  -1 -16  -6   27.06    2.96
   0  17   7  249.54    6.92
   0  17   7  291.33    7.38
 -17   0   7  253.69    6.67
  17   0  -7  249.27    7.32
  17   0  -7  274.95    7.15
   0 -17  -7  278.86    6.84
   0 -17  -7  262.82    7.04
  -1  18   8   13.71    2.98
  -1  18   8   15.98    3.35
 -18   1   8    1.06    2.46
  18  -1  -8   -0.11    2.76
  18  -1  -8    1.44    2.96
   1 -18  -8   12.76    2.88
   1 -18  -8   13.78    3.00
  -2  19   9    5.50    3.39
 -19   2   9  154.87    8.30
  19  -2  -9  144.39    7.16
  19  -2  -9  167.89    7.47
   2 -19  -9    3.78    2.97
   2 -19  -9    7.01    3.39
  -3  20  10   31.96    4.77
  20  -3 -10    8.95    4.02
  20  -3 -10   10.48    4.21
   3 -20 -10   34.40    4.83
  18   1 -10   22.54    4.10
  18   1 -10   24.13    4.66
  -1 -18 -10    0.24    3.56
   1  18  10   -3.37    3.48
  17   2  -9    4.50    3.37
  17   2  -9    6.34    3.53
  -2 -17  -9  156.25    6.56
   2  17   9  155.46    6.55
 -17  -2   9    6.23    3.04
  16   3  -8   18.94    3.51
  16   3  -8   18.19    3.54
  -3 -16  -8   14.35    3.20
  -3 -16  -8   15.60    3.24
   3  16   8   14.99    3.23
   3  16   8   11.41    3.14
 -16  -3   8   19.10    3.10
  15   4  -7    3.99    2.68
  15   4  -7    4.29    2.56
  -4 -15  -7    8.89    2.41
  -4 -15  -7    7.38    2.51
   4  15   7    9.66    2.60
   4  15   7    9.22    2.71
 -15  -4   7    3.47    2.23
  14   5  -6    4.57    2.44
  14   5  -6    0.54    1.95
  -5 -14  -6   73.36    3.76
  -5 -14  -6   66.09    3.74
   5  14   6   72.47    3.86
   5  14   6   87.59    4.43
 -14  -5   6    1.06    1.80
  13   6  -5  277.77    6.61
  13   6  -5  310.56    6.03
  -6 -13  -5  206.20    4.97
  -6 -13  -5  195.45    4.77
   6  13   5  198.37    4.79
   6  13   5  231.35    5.42
 -13  -6   5  298.24    5.53
  12   7  -4   46.17    3.36
  12   7  -4   47.35    2.71
  -7 -12  -4   61.01    2.92
  -7 -12  -4   60.89    2.77
   7  12   4   59.92    2.75
   7  12   4   71.82    3.28
 -12  -7   4   45.19    2.55
  11   8  -3   31.49    2.57
  11   8  -3   35.55    2.17
  -8 -11  -3  695.11    7.22
  -8 -11  -3  610.31    5.92
   8  11   3  697.79    7.24
   8  11   3  608.44    5.92
   8  11   3  751.24    7.15
  10   9  -2   10.58    1.82
  10   9  -2   12.10    1.43
  -9 -10  -2  934.70    5.91
   9  10   2 1266.58    9.31
   9  10   2  916.08    5.85
   9  10   2 1277.85    7.95
   9  10  -1    1.88    1.42
   9  10  -1    3.86    0.80
 -10  -9  -1  125.97    2.30
  10   9   1  114.86    3.15
  10   9   1   55.98    1.28
   8  11   0  272.75    4.84
   8  11   0  213.26    2.71
 -11  -8   0  721.70    4.58
  11   8   0  786.04    7.56
  11   8   0  873.31    3.57
  -8 -11   0  316.72    2.09
   7  12   1  218.06    4.36
   7  12   1  102.46    2.11
   7  12   1  204.70    2.51
  12   7  -1  299.36    5.02
  12   7  -1  337.91    3.01
  -7 -12  -1  252.53    2.72
   6  13   2  401.65    5.71
   6  13   2  253.05    3.67
   6  13   2  447.96    4.63
  13   6  -2    1.25    1.28
  13   6  -2   -0.02    0.82
  -6 -13  -2  392.28    5.65
  -6 -13  -2  265.49    3.77
   5  14   3   36.15    2.58
   5  14   3   27.65    1.95
   5  14   3   41.91    2.34
  14   5  -3    8.41    1.79
  14   5  -3   10.12    1.44
  -5 -14  -3   39.84    2.66
  -5 -14  -3   32.19    2.04
   4  15   4    2.14    1.39
   4  15   4    2.25    1.53
  15   4  -4    2.91    1.74
  15   4  -4    4.15    1.52
  -4 -15  -4    3.34    1.72
  -4 -15  -4    0.45    1.34
   3  16   5   55.38    3.31
   3  16   5   59.48    3.72
  16   3  -5  306.35    6.99
  16   3  -5  347.06    6.34
  -3 -16  -5   56.52    3.52
  -3 -16  -5   49.95    3.24
   2  17   6   43.15    3.65
   2  17   6   53.89    3.99
 -17  -2   6   26.72    3.34
  17   2  -6   21.66    2.99
  17   2  -6   22.63    2.75
  -2 -17  -6   41.09    3.65
  -2 -17  -6   40.85    3.61
   1  18   7  123.82    5.39
   1  18   7  149.55    5.88
 -18  -1   7   27.79    3.14
  18   1  -7   20.41    3.21
  18   1  -7   32.98    4.10
  -1 -18  -7  124.79    5.23
  -1 -18  -7  118.06    5.31
   0  19   8   85.12    5.09
   0  19   8   98.12    5.88
 -19   0   8   90.58    5.19
  19   0  -8   87.23    5.47
  19   0  -8   99.42    5.83
   0 -19  -8   88.47    5.24
   0 -19  -8   83.71    5.03
  -1  20   9   18.76    3.62
  20  -1  -9   48.85    5.82
  20  -1  -9   57.26    5.89
   1 -20  -9   17.31    4.15
   1 -20  -9   18.41    3.57
  -2  21  10   21.67    4.53
  21  -2 -10   23.15    4.63
  21  -2 -10   29.49    4.87
   2 -21 -10   20.63    4.43
  19   2 -10   18.14    4.35
  19   2 -10   21.58    4.21
  -2 -19 -10   21.39    4.31
   2  19  10   22.68    4.39
  18   3  -9   10.31    3.78
  18   3  -9    7.50    3.51
  -3 -18  -9    5.39    3.23
   3  18   9   10.14    3.42
 -18  -3   9   10.24    3.19
  17   4  -8  190.94    7.41
  17   4  -8  216.76    7.27
  -4 -17  -8   45.35    4.59
   4  17   8   47.85    4.61
   4  17   8   48.38    4.97
 -17  -4   8  210.64    6.70
  16   5  -7   36.51    3.99
  16   5  -7   38.18    4.13
  -5 -16  -7   11.36    2.58
  -5 -16  -7    8.46    2.60
   5  16   7   10.03    2.64
   5  16   7   11.69    2.89
 -16  -5   7   38.41    3.70
  15   6  -6  188.95    6.35
  15   6  -6  217.67    5.91
  -6 -15  -6   69.31    3.88
  -6 -15  -6   63.51    4.01
   6  15   6   66.68    4.03
   6  15   6   76.90    4.37
 -15  -6   6  203.03    5.32
  14   7  -5   42.66    3.93
  14   7  -5   45.94    3.48
  -7 -14  -5   16.11    2.23
  -7 -14  -5   16.90    2.15
   7  14   5   16.80    2.15
   7  14   5   19.35    2.42
 -14  -7   5   46.65    3.03
  13   8  -4  506.05    8.11
  13   8  -4  608.95    7.33
  -8 -13  -4   11.06    1.92
  -8 -13  -4   11.05    1.67
   8  13   4   11.93    1.91
   8  13   4    9.71    1.61
   8  13   4   10.91    1.90
 -13  -8   4  590.25    6.64
  12   9  -3   19.43    2.29
  12   9  -3   21.21    2.00
  -9 -12  -3   54.42    2.91
  -9 -12  -3   45.89    2.08
   9  12   3   55.52    2.92
   9  12   3   45.55    2.07
   9  12   3   63.09    2.71
  11  10  -2  534.06    7.39
  11  10  -2  611.90    5.58
 -10 -11  -2   10.97    1.16
  10  11   2   15.14    1.76
  10  11   2   10.36    1.10
  10  11   2   17.60    1.72
  10  11  -1    9.21    1.80
  10  11  -1    9.77    1.04
 -11 -10  -1   15.58    1.29
  11  10   1   17.51    2.10
  11  10   1    7.22    0.88
   9  12   0  403.72    6.10
   9  12   0  332.89    3.43
 -12  -9   0  257.53    2.91
  12   9   0  269.78    4.83
  12   9   0  299.75    2.24
  -9 -12   0  472.09    2.59
   8  13   1  238.24    4.70
   8  13   1  120.07    2.36
  13   8  -1   12.05    1.83
  13   8  -1   13.20    1.06
  -8 -13  -1  281.83    2.92
   7  14   2   58.02    3.00
   7  14   2   30.54    1.65
   7  14   2   61.27    2.13
  14   7  -2  371.69    6.21
  14   7  -2  427.15    4.42
  -7 -14  -2   54.89    2.90
   6  15   3   11.39    1.97
   6  15   3    8.19    1.32
   6  15   3   13.65    1.62
  15   6  -3   82.87    3.88
  15   6  -3   92.46    2.95
  -6 -15  -3   11.75    1.99
  -6 -15  -3    9.93    1.41
   5  16   4  433.42    6.33
   5  16   4  571.00    7.25
  16   5  -4    0.65    1.77
  16   5  -4    0.16    1.37
  -5 -16  -4  526.74    7.56
  -5 -16  -4  449.05    6.45
   4  17   5    5.80    1.87
   4  17   5    8.84    2.10
  17   4  -5    1.65    2.01
  17   4  -5    2.12    1.80
  -4 -17  -5    9.85    2.28
  -4 -17  -5    6.80    1.92
   3  18   6  339.51    7.09
   3  18   6  413.30    7.97
 -18  -3   6   18.77    2.58
  18   3  -6   17.92    2.98
  18   3  -6   19.79    2.78
  -3 -18  -6  368.78    7.38
  -3 -18  -6  337.98    7.07
   2  19   7   97.20    5.02
   2  19   7  106.53    5.37
 -19  -2   7    8.76    2.43
  19   2  -7    5.26    2.74
  19   2  -7    8.04    2.80
  -2 -19  -7   97.80    5.03
  -2 -19  -7   91.59    4.94
   1  20   8    4.73    2.99
   1  20   8    8.68    3.27
 -20  -1   8   11.15    2.97
  20   1  -8    9.29    3.17
  20   1  -8   13.95    3.39
  -1 -20  -8    6.29    2.97
  -1 -20  -8    7.13    3.07
   0  21   9   97.29    6.35
  21   0  -9   91.12    6.75
  21   0  -9  111.66    6.24
   0 -21  -9   93.38    6.26
  -1  22  10    4.27    3.78
  22  -1 -10   55.39    6.66
  22  -1 -10   68.04    6.11
   1 -22 -10    2.53    3.72
  20   3 -10    0.30    3.65
  20   3 -10   -1.40    3.81
  -3 -20 -10   20.75    4.24
   3  20  10   20.19    4.33
  19   4  -9    0.10    3.06
  19   4  -9    2.38    3.48
  -4 -19  -9   49.06    5.33
   4  19   9   48.98    5.41
  18   5  -8    2.81    3.22
  18   5  -8    0.53    2.51
  -5 -18  -8   16.49    3.17
   5  18   8   17.12    3.27
   5  18   8   18.88    3.45
  17   6  -7    2.11    2.56
  17   6  -7    0.92    2.49
  -6 -17  -7   84.36    4.72
  -6 -17  -7   87.07    4.67
   6  17   7   78.45    4.60
   6  17   7  100.60    5.52
 -17  -6   7    2.72    2.39
  16   7  -6   54.20    4.26
  16   7  -6   67.90    4.36
  -7 -16  -6  106.48    4.49
  -7 -16  -6   95.15    4.24
   7  16   6   96.90    4.27
   7  16   6  111.36    4.90
 -16  -7   6   65.41    3.80
  15   8  -5   53.08    3.91
  15   8  -5   55.97    3.45
  -8 -15  -5   22.95    2.58
  -8 -15  -5   23.39    2.77
   8  15   5   21.12    2.50
   8  15   5   24.88    2.83
   8  15   5   26.31    2.71
 -15  -8   5   54.86    3.14
  14   9  -4   -0.34    1.82
  14   9  -4   -0.70    1.45
  -9 -14  -4  154.45    4.41
  -9 -14  -4  135.33    3.65
   9  14   4  159.88    4.45
   9  14   4  134.22    3.63
   9  14   4  172.79    4.51
 -14  -9   4   -0.16    1.18
  13  10  -3   74.22    3.94
  13  10  -3   92.02    2.97
 -10 -13  -3   89.02    3.42
 -10 -13  -3   64.39    2.33
  10  13   3   87.33    3.44
  10  13   3   67.15    2.34
  10  13   3   88.97    3.08
 -13 -10   3   87.09    2.52
  12  11  -2  234.43    5.52
  12  11  -2  260.10    3.85
  11  12   2  184.73    4.35
  11  12   2   96.95    2.12
  11  12   2  170.31    3.29
  11  12  -1   44.04    3.08
  11  12  -1   48.58    1.80
 -12 -11  -1  116.70    2.39
  12  11   1  106.78    3.57
  12  11   1   67.78    1.51
 -11 -12   1   37.60    0.99
  10  13   0   78.77    3.46
  10  13   0   68.57    1.89
 -13 -10   0   65.52    1.72
  13  10   0   71.23    3.25
  13  10   0   78.84    1.32
 -10 -13   0   91.22    1.27
   9  14   1  182.80    4.58
   9  14   1   94.51    2.24
  14   9  -1  579.71    7.66
  14   9  -1  650.86    4.22
  -9 -14  -1  213.76    2.61
   8  15   2   82.41    3.34
   8  15   2   42.24    1.85
   8  15   2   86.18    2.47
  15   8  -2  123.06    4.31
  15   8  -2  134.47    2.73
   7  16   3   14.70    2.14
   7  16   3   13.20    1.52
   7  16   3   18.73    1.83
  16   7  -3   34.94    3.34
  16   7  -3   37.99    2.37
  -7 -16  -3   17.39    2.21
  -7 -16  -3   15.35    1.84
   6  17   4    4.05    1.80
   6  17   4    4.23    1.52
   6  17   4    5.78    1.75
  17   6  -4   18.13    2.60
  17   6  -4   19.59    2.12
  -6 -17  -4    6.42    2.00
  -6 -17  -4    5.93    1.61
   5  18   5  192.09    5.03
   5  18   5  241.38    5.64
  18   5  -5  101.83    5.07
  18   5  -5  104.66    4.03
  -5 -18  -5  218.20    5.76
  -5 -18  -5  195.79    5.05
   4  19   6   31.58    3.43
   4  19   6   41.32    3.87
 -19  -4   6   77.63    4.05
  19   4  -6   72.96    5.11
  19   4  -6   80.06    4.53
  -4 -19  -6   36.09    3.84
  -4 -19  -6   29.83    3.41
   3  20   7  118.06    5.58
   3  20   7  148.24    5.98
 -20  -3   7    2.62    2.29
  20   3  -7    0.73    2.65
  20   3  -7    4.28    2.60
  -3 -20  -7  130.34    5.82
  -3 -20  -7  121.06    5.62
   2  21   8    2.47    2.83
   2  21   8    3.12    3.02
 -21  -2   8    2.57    3.09
  21   2  -8    2.01    2.94
  21   2  -8   -1.58    2.89
  -2 -21  -8    2.32    2.91
  -2 -21  -8    2.47    2.74
   1  22   9    1.76    3.19
  22   1  -9   53.18    5.64
  22   1  -9   67.78    6.14
  -1 -22  -9   -0.22    3.05
  20   5  -9   -0.24    3.56
  20   5  -9    5.58    3.43
   5  20   9    3.65    3.58
  19   6  -8    3.98    3.43
  19   6  -8    5.39    3.08
  -6 -19  -8    2.48    2.80
   6  19   8    5.20    2.90
   6  19   8    6.04    3.16
  18   7  -7   90.70    5.93
  18   7  -7  104.12    5.24
  -7 -18  -7   41.29    4.23
   7  18   7   37.22    4.23
   7  18   7   45.47    4.81
  17   8  -6   -0.04    2.33
  17   8  -6   -0.02    2.19
  -8 -17  -6   78.43    4.48
  -8 -17  -6   69.18    4.05
   8  17   6   76.81    4.19
   8  17   6   74.03    4.14
   8  17   6   88.25    4.86
  16   9  -5  103.63    5.28
  16   9  -5  112.29    4.20
  -9 -16  -5   21.51    2.67
  -9 -16  -5   15.89    2.18
   9  16   5   19.76    2.64
   9  16   5   14.06    2.14
   9  16   5   18.53    2.52
  15  10  -4   76.91    4.19
  15  10  -4   91.15    3.53
 -10 -15  -4  289.81    5.88
 -10 -15  -4  227.71    4.49
  10  15   4  287.19    5.85
  10  15   4  225.46    4.46
  10  15   4  298.29    5.63
  14  11  -3    3.92    1.96
  14  11  -3    2.94    1.36
 -11 -14  -3   50.88    2.46
  11  14   3   73.02    3.48
  11  14   3   45.12    2.09
  11  14   3   67.71    2.99
  13  12  -2  114.69    4.50
  13  12  -2  127.15    2.95
  12  13   2    1.86    1.72
  12  13   2    1.33    0.74
  12  13  -1   14.68    2.15
  12  13  -1   21.91    1.58
 -13 -12  -1  192.63    4.29
  13  12   1  166.16    4.45
  13  12   1  122.97    2.04
  11  14   0   60.79    3.20
  11  14   0   55.08    1.86
 -14 -11   0  174.32    3.83
  14  11   0  167.84    4.62
  14  11   0  195.57    2.91
  10  15   1  407.65    6.75
  10  15   1  230.04    3.30
  15  10  -1   39.07    3.12
  15  10  -1   42.87    1.45
   9  16   2  228.95    5.19
   9  16   2  111.13    2.71
   9  16   2  223.07    3.54
  16   9  -2  233.34    5.73
  16   9  -2  257.04    3.58
   8  17   3  375.00    6.74
   8  17   3  233.04    4.25
   8  17   3  403.46    5.46
  17   8  -3   91.47    4.17
  17   8  -3   97.41    3.04
  -8 -17  -3  380.43    6.76
  -8 -17  -3  249.13    4.40
   7  18   4   11.28    2.36
   7  18   4    9.86    1.76
   7  18   4   15.89    2.14
  18   7  -4    0.11    1.99
  18   7  -4   -0.61    1.49
  -7 -18  -4   14.43    2.50
  -7 -18  -4    7.33    1.72
   6  19   5   28.82    3.52
   6  19   5   27.89    3.03
   6  19   5   34.74    3.49
  19   6  -5   11.67    2.94
  19   6  -5   14.33    2.28
  -6 -19  -5   30.04    3.60
  -6 -19  -5   28.84    3.05
   5  20   6    6.28    2.31
   5  20   6    5.32    2.36
  20   5  -6   15.51    3.13
  20   5  -6   13.36    2.65
  -5 -20  -6    4.36    2.39
  -5 -20  -6    3.99    2.22
   4  21   7    7.81    2.68
   4  21   7    7.10    2.85
  21   4  -7   28.09    3.91
  21   4  -7   27.34    3.48
  -4 -21  -7    7.93    2.91
  -4 -21  -7    6.69    2.64
   3  22   8   -1.08    2.78
   3  22   8    1.55    2.96
  22   3  -8   19.12    3.84
  22   3  -8   20.31    3.65
  -3 -22  -8    0.60    2.77
   2  23   9   10.27    3.67
  23   2  -9    3.11    3.79
  23   2  -9    2.82    3.54
  -2 -23  -9   12.61    3.74
  21   6  -9    6.98    4.00
  20   7  -8   12.05    3.94
  20   7  -8   12.46    4.01
   7  20   8   17.98    3.80
  19   8  -7    7.01    3.39
  19   8  -7    3.71    2.73
   8  19   7   14.88    3.22
  18   9  -6    0.12    2.52
  18   9  -6   -0.34    2.24
  -9 -18  -6    6.27    2.52
   9  18   6    6.38    2.43
   9  18   6    6.97    2.54
  17  10  -5    7.79    2.67
  17  10  -5    6.21    2.16
 -10 -17  -5    1.07    2.10
  10  17   5   -0.75    2.01
  10  17   5    0.40    2.00
  16  11  -4   78.88    4.78
  16  11  -4   87.03    3.54
 -11 -16  -4    1.52    1.95
  11  16   4    0.80    1.98
  11  16   4   -0.13    1.75
  15  12  -3   71.52    4.05
  15  12  -3   77.15    2.96
  12  15   3   11.10    2.18
  12  15   3    9.14    1.63
  14  13  -2  108.71    4.42
  14  13  -2  123.23    3.57
  13  14   2   89.78    3.87
  13  14  -1   44.28    3.58
  14  13   1   32.13    3.06
  12  15   0   16.56    2.31
  15  12   0    9.46    2.13
  11  16   1  171.07    5.03
  16  11  -1    8.24    2.20
  10  17   2  652.65    8.79
  10  17   2  312.83    5.40
  17  10  -2  222.30    5.90
   9  18   3   66.00    3.88
   9  18   3   37.16    2.30
   9  18   3   76.42    4.62
  18   9  -3   92.39    4.40
  -9 -18  -3   67.77    3.84
   8  19   4  397.70    7.42
   8  19   4  285.06    5.35
   8  19   4  445.54    7.30
  19   8  -4   22.50    3.04
  -8 -19  -4  398.93    7.44
   7  20   5  111.03    4.91
   7  20   5   87.17    3.91
   7  20   5  130.14    5.38
  20   7  -5   19.18    3.40
  -7 -20  -5  116.06    4.99
   6  21   6   27.14    3.40
   6  21   6   19.02    2.77
   6  21   6   28.90    4.26
  21   6  -6   43.79    4.55
  -6 -21  -6   26.83    3.42
   5  22   7    1.69    2.78
  22   5  -7   77.94    6.09
  -5 -22  -7    0.58    2.75
  23   4  -8   67.10    5.84
  24   3  -9   12.26    4.38
  22   7  -9   -0.58    3.40
  21   8  -8   50.26    5.49
  20   9  -7   11.24    3.44
  19  10  -6   77.14    5.28
  18  11  -5   25.18    3.46
 -11 -18  -5  143.30    5.12
  11  18   5  139.99    5.09
  17  12  -4  141.35    5.60
  12  17   4   17.55    2.68
  16  13  -3  168.49    5.65
  13  16   3   70.19    4.09
  15  14  -2    1.41    2.26
  14  15   2    1.92    1.87
  14  15  -1   64.77    3.84
  15  14   1  293.93    6.26
  13  16   0  225.02    5.94
  16  13   0   87.01    4.19
  12  17   1    6.23    2.29
  17  12  -1  117.21    4.50
  11  18   2  159.01    5.21
  18  11  -2   13.23    2.46
  10  19   3   11.35    2.47
  19  10  -3  267.14    6.77
   9  20   4   53.19    4.08
  20   9  -4   34.79    3.92
  -9 -20  -4   59.62    4.18
   8  21   5   59.48    4.42
  21   8  -5  118.69    5.67
  -8 -21  -5   68.23    4.53
   7  22   6    2.87    2.61
  22   7  -6   13.85    3.61
  -7 -22  -6    1.75    2.64
  23   6  -7   76.93    5.75
  24   5  -8   26.78    4.45
  25   4  -9    1.78    4.13
  22   9  -8    9.26    3.81
  21  10  -7   47.97    5.87
  20  11  -6   18.74    3.94
  19  12  -5    0.00    2.62
 -12 -19  -5    4.64    2.81
  12  19   5    3.39    2.50
  18  13  -4  145.21    6.23
  13  18   4   19.03    2.88
  17  14  -3    8.41    2.60
  14  17   3    2.61    2.26
  16  15  -2   29.17    3.54
  15  16   2   21.04    2.82
  15  16  -1  112.60    5.09
  16  15   1  196.47    5.64
  14  17   0  114.46    5.00
  17  14   0    4.28    2.29
  13  18   1  167.29    5.54
  18  13  -1  370.84    7.42
  12  19   2   12.10    2.72
  19  12  -2   10.20    2.77
  11  20   3   28.04    3.30
  20  11  -3   18.94    3.03
  10  21   4   29.45    3.27
  21  10  -4   43.72    4.74
 -10 -21  -4   35.39    3.87
   9  22   5  161.72    5.92
  22   9  -5  164.28    6.55
  -9 -22  -5  164.24    5.96
   8  23   6   24.76    3.55
  23   8  -6   16.85    3.63
  -8 -23  -6   23.46    3.55
  24   7  -7   60.24    6.28
  25   6  -8   16.47    4.54
  23  10  -8   -1.63    3.37
  22  11  -7   22.83    4.56
  21  12  -6   -0.22    2.98
  20  13  -5   87.92    6.05
  19  14  -4   85.17    5.21
  14  19   4   84.19    4.62
  18  15  -3   98.24    5.54
  15  18   3  129.23    5.19
  17  16  -2   92.25    4.87
  16  17   2    2.68    2.37
  16  17  -1   24.36    3.33
  17  16   1   84.13    4.55
  15  18   0  170.60    5.69
  18  15   0    9.72    2.69
  14  19   1   55.80    4.31
  19  14  -1    0.70    2.47
  13  20   2   37.72    3.63
  20  13  -2   23.98    3.15
  12  21   3   22.29    3.19
  21  12  -3   -0.27    2.70
  11  22   4    2.44    2.58
  22  11  -4   98.60    5.48
  10  23   5    0.84    2.71
  23  10  -5    2.70    2.94
 -10 -23  -5    4.66    2.77
  24   9  -6   58.69    5.48
  25   8  -7    1.82    3.41
  26   7  -8    9.26    4.02
  24  11  -8   11.49    4.10
  23  12  -7   -1.67    3.33
  22  13  -6    4.84    3.33
  21  14  -5  125.09    6.43
  20  15  -4   28.58    4.10
  15  20   4   31.94    3.58
  19  16  -3   25.87    3.56
  16  19   3   24.03    3.28
  18  17  -2  188.46    6.79
  17  18   2    1.93    2.53
  17  18  -1    7.15    2.67
  18  17   1    2.49    2.53
  16  19   0  124.76    5.70
  19  16   0   69.38    4.76
  15  20   1   -0.88    2.58
  20  15  -1    1.93    2.70
  14  21   2   24.69    3.44
  21  14  -2    1.23    2.77
  13  22   3   26.23    3.43
  22  13  -3   39.60    4.32
  12  23   4    4.30    2.91
  23  12  -4   47.42    5.45
  11  24   5    7.00    3.12
  24  11  -5   -2.01    3.31
  25  10  -6    4.76    3.42
  26   9  -7    5.55    4.10
  24  13  -7   -3.29    3.77
  23  14  -6   76.34    6.13
  22  15  -5   54.98    5.49
  21  16  -4   12.45    3.80
  20  17  -3    6.79    3.01
  17  20   3   28.50    3.59
  19  18  -2   26.01    3.92
  18  19   2    2.26    2.67
  18  19  -1   54.19    4.60
  19  18   1   42.80    4.55
  17  20   0   15.06    3.40
  20  17   0   15.41    3.28
  16  21   1   -0.53    2.68
  21  16  -1    4.02    2.64
  15  22   2   32.50    3.92
  22  15  -2    9.66    3.28
  14  23   3    1.65    2.88
  23  14  -3   91.92    5.55
  13  24   4   38.78    4.68
  24  13  -4   15.17    3.86
  25  12  -5   -0.22    3.12
  26  11  -6   20.32    4.59
  27  10  -7   13.96    4.65
  24  15  -6   62.59    6.86
  23  16  -5  126.31    6.96
  22  17  -4    2.49    3.20
  21  18  -3   35.19    4.50
  18  21   3   29.77    3.78
  20  19  -2   32.61    4.09
  19  20   2    6.10    2.97
  19  20  -1    4.88    2.94
  20  19   1  132.60    6.08
  18  21   0   46.66    4.56
  21  18   0   -0.54    2.84
  17  22   1   20.01    3.52
  22  17  -1    1.83    3.06
  16  23   2  101.26    5.79
  23  16  -2    7.49    3.43
  15  24   3   42.94    4.98
  24  15  -3   43.28    4.78
  14  25   4   23.34    3.89
  25  14  -4   73.72    6.36
  26  13  -5   12.71    3.87
  27  12  -6    5.22    4.20
  25  16  -6    9.42    4.45
  24  17  -5    3.80    4.14
  23  18  -4    3.83    3.85
  22  19  -3    1.17    3.12
  21  20  -2   25.43    4.31
  20  21   2   40.36    4.38
  20  21  -1   23.80    4.09
  21  20   1   22.37    3.82
  19  22   0   19.69    3.89
  22  19   0   10.98    3.37
  18  23   1   95.32    6.14
  23  18  -1    0.11    3.25
  17  24   2   -2.07    3.09
  24  17  -2   47.44    5.63
  16  25   3    0.45    3.13
  25  16  -3    7.36    3.78
  26  15  -4   38.13    4.73
  27  14  -5    2.59    3.61
  28  13  -6   15.57    4.35
  25  18  -5    7.65    3.96
  24  19  -4   10.32    4.36
  23  20  -3   20.08    4.13
  22  21  -2    0.07    3.54
  21  22   2    6.29    3.47
  21  22  -1   51.61    5.99
  22  21   1   13.95    3.76
  20  23   0   73.22    6.15
  23  20   0   13.71    3.87
  19  24   1   12.13    3.88
  24  19  -1    0.56    3.38
  18  25   2  119.20    6.63
  25  18  -2    3.22    3.25
  17  26   3    6.75    3.54
  26  17  -3    6.12    3.96
  27  16  -4   19.22    4.64
  28  15  -5   34.31    5.38
  25  20  -4    5.13    4.38
  24  21  -3   -2.22    3.82
  23  22  -2   26.57    4.40
  22  23  -1   16.03    4.37
  23  22   1   65.91    6.09
  21  24   0   68.17    5.75
  24  21   0    4.63    3.67
  20  25   1   44.48    4.94
  25  20  -1   72.84    5.80
  19  26   2   33.65    4.58
  26  19  -2    0.38    3.73
  27  18  -3    9.16    4.27
  28  17  -4    2.33    4.09
  25  22  -3   40.02    5.56
  24  23  -2   -1.52    3.94
  23  24  -1   38.96    5.24
  22  25   0    2.54    3.85
  25  22   0   45.48    5.15
  21  26   1   -0.26    3.27
  26  21  -1   41.58    4.84
  20  27   2   -3.30    4.93
  27  20  -2   15.66    4.43
   8  -8 -11   22.89    4.13
   8  -8 -11   25.78    4.92
   7  -7 -10    1.55    2.77
   7  -7 -10    0.12    3.07
   6  -6  -9    1.65    2.16
   6  -6  -9    2.70    3.05
  -6   6   9    3.50    2.65
   5  -5  -8   11.08    2.46
   5  -5  -8   12.60    3.04
  -5   5   8   11.96    2.99
   4  -4  -7    5.26    1.92
   4  -4  -7    9.64    2.55
  -4   4   7    8.52    2.42
   3  -3  -6  262.65    5.28
   3  -3  -6  305.07    6.17
  -3   3   6  315.84    6.41
   2  -2  -5    1.04    1.02
   2  -2  -5    1.20    1.32
  -2   2   5    2.81    1.41
   1  -1  -4   19.93    1.44
   1  -1  -4   21.86    1.80
  -1   1   4   23.95    2.08
   0   0  -3   71.54    1.88
   0   0  -3   80.25    2.25
   0   0   3   87.54    2.36
  -1   1  -2  139.46    1.91
  -1   1  -2  152.33    2.39
  -1   1  -2  166.65    2.48
   1  -1   2  162.54    2.48
  -2   2  -1  249.93    1.60
  -2   2  -1  239.88    2.14
  -2   2  -1  187.87    1.90
   2  -2   1  271.92    2.29
  -3   3   0   22.53    0.57
  -4   4   1 1005.42    5.03
   4  -4  -1 1058.68    5.18
   4  -4  -1 1017.32    5.05
  -5   5   2  127.66    2.42
   5  -5  -2  129.22    2.45
   6  -6  -3    4.41    0.96
   6  -6  -3    6.44    1.10
   7  -7  -4  451.42    5.96
   7  -7  -4  504.36    6.52
  -8   8   5    9.71    1.73
   8  -8  -5    9.03    1.79
   8  -8  -5   11.88    1.87
  -9   9   6   78.78    3.81
   9  -9  -6   71.55    3.52
   9  -9  -6   78.22    3.87
 -10  10   7   23.07    2.81
  10 -10  -7   22.09    2.87
  10 -10  -7   26.11    3.31
 -11  11   8    4.73    2.96
 -11  11   8    2.66    2.33
  11 -11  -8    3.61    2.30
  11 -11  -8    2.70    2.87
 -12  12   9    7.82    3.21
 -12  12   9    7.21    3.86
  12 -12  -9    8.36    3.14
  12 -12  -9   11.07    3.32
 -13  13  10   48.56    5.35
  13 -13 -10   48.26    5.05
  13 -13 -10   54.18    5.68
 -14  14  11   13.15    4.66
  14 -14 -11    6.79    3.51
  14 -14 -11   15.10    4.63
   9  -7 -11   33.95    4.52
   9  -7 -11   26.06    4.60
   7  -9 -11    3.94    3.39
   7  -9 -11    1.68    3.51
   8  -6 -10   32.42    3.83
   8  -6 -10   36.95    4.47
   6  -8 -10  131.55    6.16
   6  -8 -10  142.77    6.89
   7  -5  -9  118.04    5.48
   7  -5  -9  131.96    6.49
   5  -7  -9   57.45    4.06
   5  -7  -9   70.20    5.56
  -5   7   9   74.37    5.57
  -7   5   9  150.54    6.68
   6  -4  -8   33.07    3.23
   6  -4  -8   44.88    4.51
   4  -6  -8    4.08    2.12
   4  -6  -8    7.21    2.56
  -4   6   8    9.66    2.88
  -6   4   8   41.07    3.96
   5  -3  -7   29.36    2.79
   5  -3  -7   35.85    3.39
   3  -5  -7   33.35    2.78
   3  -5  -7   34.92    3.40
  -3   5   7   36.86    3.46
  -5   3   7   40.74    3.82
   4  -2  -6   95.29    3.60
   4  -2  -6  110.94    4.11
   2  -4  -6   36.20    2.61
   2  -4  -6   41.75    3.00
  -2   4   6   46.85    3.18
  -4   2   6  115.97    4.15
   3  -1  -5  119.47    3.43
   3  -1  -5  143.56    3.98
   1  -3  -5  100.60    3.08
   1  -3  -5  107.84    3.68
  -1   3   5  116.59    3.88
  -3   1   5  149.43    4.16
   2   0  -4   14.61    1.39
   2   0  -4   14.69    1.62
   0  -2  -4   13.19    1.38
   0  -2  -4   14.40    1.61
   0   2   4   15.20    1.67
  -2   0   4   14.39    1.69
   1   1  -3 1374.57    7.77
   1   1  -3 1564.65    9.10
  -1  -1  -3 1145.57    6.58
  -1  -1  -3 1210.58    7.90
   1   1   3 1290.82    8.29
  -1  -1   3 1678.99    9.26
   0   2  -2  264.05    2.81
   0   2  -2  281.97    3.21
   0   2  -2  314.01    3.24
  -2   0  -2  261.08    2.40
  -2   0  -2  306.82    3.34
   2   0   2  317.38    3.45
   0  -2   2  312.82    3.29
  -1   3  -1   74.76    1.16
  -1   3  -1   63.75    1.20
  -1   3  -1   51.12    0.97
  -3   1  -1  191.34    1.84
  -3   1  -1  191.15    2.03
   3  -1   1  180.44    1.99
   1  -3   1   85.51    1.26
  -2   4   0   45.58    0.86
  -4   2   0   91.98    1.01
  -3   5   1   29.16    0.98
  -5   3   1  776.67    4.32
   5  -3  -1  755.17    4.45
   5  -3  -1  780.39    4.32
   3  -5  -1   30.28    1.01
   3  -5  -1   28.08    0.97
   6  -4  -2   70.90    1.93
   6  -4  -2   76.34    1.98
   4  -6  -2 1267.08    7.25
   4  -6  -2 1276.86    7.39
  -5   7   3   59.22    2.28
   7  -5  -3  364.52    4.75
   7  -5  -3  405.48    5.05
   5  -7  -3   55.80    2.15
   5  -7  -3   58.52    2.30
   8  -6  -4   83.16    2.98
   8  -6  -4   90.89    3.05
   6  -8  -4  731.83    7.53
   6  -8  -4  799.24    8.08
  -7   9   5    1.45    1.44
   9  -7  -5  164.15    4.29
   9  -7  -5  187.58    4.69
   7  -9  -5    1.46    1.46
   7  -9  -5    2.47    1.68
  -8  10   6   54.60    3.67
 -10   8   6  143.78    4.95
  10  -8  -6  125.58    4.33
  10  -8  -6  146.24    5.05
   8 -10  -6   44.91    3.30
   8 -10  -6   49.56    3.41
  -9  11   7   46.60    3.86
  -9  11   7   47.88    4.08
 -11   9   7   84.10    4.33
  11  -9  -7   77.03    4.36
  11  -9  -7   88.39    4.88
   9 -11  -7   48.25    3.50
   9 -11  -7   51.13    3.96
 -10  12   8   97.65    5.29
 -10  12   8  105.22    5.19
 -12  10   8    2.82    2.53
  12 -10  -8   -0.78    2.41
  12 -10  -8   -0.71    2.73
  10 -12  -8   91.07    5.09
  10 -12  -8  105.48    5.39
 -11  13   9   26.65    3.90
 -11  13   9   28.35    6.27
 -13  11   9   -0.80    3.20
 -13  11   9    3.16    3.56
  13 -11  -9   -0.19    2.87
  13 -11  -9    2.22    3.33
  11 -13  -9   29.48    3.92
  11 -13  -9   27.72    3.98
 -12  14  10   49.30    5.47
 -14  12  10   26.54    4.44
  14 -12 -10   26.54    4.24
  14 -12 -10   29.69    4.50
  12 -14 -10   44.54    4.87
  12 -14 -10   48.60    5.43
 -13  15  11   29.88    5.38
 -15  13  11    3.65    4.35
  15 -13 -11    4.12    3.38
  15 -13 -11    3.03    4.27
  13 -15 -11   25.08    4.25
  13 -15 -11   32.36    5.44
  10  -6 -11   30.14    4.36
  10  -6 -11   35.76    5.36
   6 -10 -11  138.72    7.51
   9  -5 -10   58.22    5.20
   9  -5 -10   72.61    6.29
   5  -9 -10   56.76    5.00
   5  -9 -10   61.67    5.54
   8  -4  -9    1.56    2.51
   8  -4  -9    4.31    2.82
   4  -8  -9   73.59    4.65
   4  -8  -9   79.09    5.24
  -4   8   9   83.65    5.77
  -8   4   9    3.16    2.70
   7  -3  -8   52.75    3.99
   7  -3  -8   64.06    4.90
   3  -7  -8  110.96    4.45
   3  -7  -8  129.89    5.77
  -3   7   8  133.40    5.85
  -7   3   8   68.15    4.85
   6  -2  -7   64.51    3.72
   6  -2  -7   76.76    4.12
   2  -6  -7  116.83    4.22
   2  -6  -7  121.72    5.06
  -2   6   7  134.20    5.32
  -6   2   7   76.09    4.05
   5  -1  -6   10.18    1.91
   5  -1  -6   12.94    2.27
   1  -5  -6  162.08    4.11
   1  -5  -6  176.50    4.88
  -1   5   6  182.70    5.05
  -5   1   6   11.87    1.98
   4   0  -5  172.75    4.09
   4   0  -5  192.16    4.52
   0  -4  -5  179.48    3.84
   0  -4  -5  189.53    4.44
   0   4   5  202.38    4.69
  -4   0   5  195.63    4.61
   3   1  -4  191.27    3.72
   3   1  -4  213.49    4.13
  -1  -3  -4    2.47    0.91
  -1  -3  -4    3.71    1.11
   1   3   4    2.66    1.27
  -3  -1   4  219.82    4.18
   2   2  -3   59.53    1.90
   2   2  -3   64.70    2.18
  -2  -2  -3    9.14    1.04
  -2  -2  -3   10.58    1.16
   2   2   3   11.83    1.31
  -2  -2   3   69.97    2.10
   1   3  -2  346.67    3.49
   1   3  -2  375.88    3.79
   1   3  -2  410.19    3.64
  -3  -1  -2   64.16    1.26
  -3  -1  -2   66.44    1.62
  -3  -1  -2   71.16    1.81
   3   1   2   70.95    1.78
  -1  -3   2  408.47    3.67
   0   4  -1  908.57    4.66
   0   4  -1  874.59    4.49
   0   4  -1 1053.01    4.66
  -4   0  -1 1126.48    5.90
  -4   0  -1 1112.06    6.73
  -4   0  -1 1036.95    4.89
   4   0   1 1013.54    4.85
   0  -4   1 1136.98    4.84
  -1   5   0  248.29    2.35
  -1   5   0   76.87    1.21
  -5   1   0   20.53    0.45
   5  -1   0   32.98    0.72
   1  -5   0  245.76    2.34
  -2   6   1  407.69    3.41
  -6   2   1  298.50    2.65
   6  -2  -1  290.06    2.93
   6  -2  -1  304.55    2.68
   2  -6  -1  493.28    3.85
   2  -6  -1  413.83    3.45
  -3   7   2  923.83    6.40
   7  -3  -2  116.69    2.41
   7  -3  -2  127.83    2.43
   3  -7  -2  974.96    6.50
   3  -7  -2  924.43    6.38
  -4   8   3 1060.58    8.11
   8  -4  -3   17.56    1.49
   8  -4  -3   19.00    1.67
   4  -8  -3 1043.54    7.82
   4  -8  -3 1076.16    8.16
  -5   9   4  142.64    3.70
  -5   9   4  149.72    3.87
   9  -5  -4  150.49    3.71
   9  -5  -4  177.02    4.10
   5  -9  -4  133.30    3.42
   5  -9  -4  146.95    3.75
  -6  10   5  184.05    4.70
  -6  10   5  192.93    4.77
  10  -6  -5    2.48    1.44
  10  -6  -5    3.30    1.73
   6 -10  -5  170.68    4.42
   6 -10  -5  181.58    4.67
  -7  11   6    2.09    1.86
  -7  11   6    1.47    1.94
 -11   7   6  111.75    4.54
  11  -7  -6   92.67    3.92
  11  -7  -6  111.48    4.37
   7 -11  -6    1.90    1.64
   7 -11  -6    0.71    1.82
  -8  12   7   26.44    3.29
  -8  12   7   30.10    3.41
 -12   8   7   66.21    4.39
  12  -8  -7   54.94    3.74
  12  -8  -7   57.39    4.44
   8 -12  -7   21.85    2.69
   8 -12  -7   26.27    3.31
  -9  13   8   14.42    3.08
  -9  13   8   17.86    3.32
 -13   9   8   96.55    5.36
  13  -9  -8   84.65    5.08
  13  -9  -8  100.02    5.32
   9 -13  -8   11.43    2.89
   9 -13  -8   14.64    3.07
 -10  14   9    0.72    2.93
 -14  10   9  156.74    6.81
 -14  10   9  158.17    8.48
  14 -10  -9  143.34    6.20
  14 -10  -9  165.55    6.92
  10 -14  -9    0.12    2.82
  10 -14  -9    1.05    2.87
 -11  15  10   12.36    4.19
 -15  11  10    5.29    3.57
  15 -11 -10    2.76    3.38
  15 -11 -10    6.16    3.59
  11 -15 -10   13.44    3.63
  11 -15 -10   13.87    4.20
 -12  16  11   70.13    6.71
 -16  12  11    2.86    3.84
  16 -12 -11    0.61    3.76
  16 -12 -11   -1.42    3.63
  12 -16 -11   73.05    6.56
  12 -16 -11   71.08    6.68
  11  -5 -11   27.31    4.39
  11  -5 -11   28.97    5.04
   5 -11 -11   20.82    4.36
  -5  11  11   18.84    4.32
  10  -4 -10   83.40    5.25
  10  -4 -10  102.00    6.83
   4 -10 -10   32.53    3.96
   4 -10 -10   31.00    4.51
   9  -3  -9   30.25    3.63
   9  -3  -9   36.31    4.54
   3  -9  -9   54.97    4.38
   3  -9  -9   65.90    5.51
  -3   9   9   66.88    5.52
  -9   3   9   39.81    4.41
   8  -2  -8   56.33    3.84
   8  -2  -8   70.86    4.63
   2  -8  -8   39.71    3.68
   2  -8  -8   41.56    4.53
  -2   8   8   49.44    4.28
  -8   2   8   71.06    4.49
   7  -1  -7   16.95    2.50
   7  -1  -7   19.09    2.66
   1  -7  -7    3.27    1.77
   1  -7  -7    2.86    2.23
  -1   7   7    0.52    2.02
  -7   1   7   19.13    2.78
   6   0  -6  376.03    6.57
   6   0  -6  433.87    7.43
   0  -6  -6  413.22    6.29
   0  -6  -6  436.76    7.36
   0   6   6  464.04    7.58
  -6   0   6  453.11    7.41
   5   1  -5   70.19    3.01
   5   1  -5   76.94    3.37
  -1  -5  -5   86.53    2.87
  -1  -5  -5   86.00    3.39
   1   5   5   95.94    3.72
  -5  -1   5   80.64    3.35
   4   2  -4  189.14    3.88
   4   2  -4  214.27    4.17
  -2  -4  -4  589.46    5.68
  -2  -4  -4  592.00    6.50
   2   4   4  632.06    7.01
  -4  -2   4  225.66    4.12
   3   3  -3   30.06    1.69
   3   3  -3   35.89    1.83
  -3  -3  -3  159.59    2.57
  -3  -3  -3  161.21    3.03
   3   3   3  177.66    3.39
  -3  -3   3   39.17    1.78
   2   4  -2 1125.82    6.77
   2   4  -2 1259.45    6.97
   2   4  -2 1442.50    6.64
  -4  -2  -2   77.14    1.46
  -4  -2  -2   79.70    1.73
  -4  -2  -2   80.65    1.95
   4   2   2   84.31    2.02
  -2  -4   2 1395.97    6.58
   1   5  -1   63.55    1.51
   1   5  -1   63.69    1.37
   1   5  -1   84.29    1.14
  -5  -1  -1  313.87    2.12
  -5  -1  -1  342.13    2.24
  -5  -1  -1  321.72    2.89
   5   1   1  324.00    2.16
   5   1   1  312.57    2.87
  -1  -5   1   79.56    1.11
   0   6   0  194.79    2.40
   0   6   0   79.06    1.34
  -6   0   0   82.97    0.73
   6   0   0  201.28    2.04
   0  -6   0  189.85    2.37
  -1   7   1  242.03    2.75
   7  -1  -1 1014.62    5.81
   7  -1  -1 1098.92    4.94
   1  -7  -1  309.18    3.33
   1  -7  -1  243.70    2.76
  -2   8   2   99.11    2.32
   8  -2  -2  286.52    3.82
   8  -2  -2  310.84    3.62
   2  -8  -2  104.29    2.34
   2  -8  -2  100.01    2.34
  -3   9   3   62.57    2.28
  -3   9   3   72.27    2.37
   9  -3  -3  109.98    2.89
   9  -3  -3  122.41    2.97
   3  -9  -3   66.95    2.38
   3  -9  -3   66.48    2.34
  -4  10   4   42.81    2.40
  -4  10   4   45.57    2.46
  10  -4  -4  630.71    7.33
  10  -4  -4  724.93    7.64
   4 -10  -4   40.62    2.41
   4 -10  -4   45.28    2.45
  -5  11   5   13.87    1.99
  -5  11   5   13.77    2.07
  11  -5  -5  392.85    6.54
  11  -5  -5  445.77    6.88
   5 -11  -5   11.76    1.77
   5 -11  -5   12.15    1.92
  -6  12   6  233.06    5.84
  -6  12   6  240.62    5.87
 -12   6   6   44.57    3.48
  12  -6  -6   37.85    3.08
  12  -6  -6   39.85    3.26
   6 -12  -6  222.25    5.38
   6 -12  -6  239.66    5.91
  -7  13   7   31.52    3.49
  -7  13   7   29.12    3.43
 -13   7   7   75.70    4.52
  13  -7  -7   66.35    4.34
  13  -7  -7   77.07    4.41
   7 -13  -7   29.51    3.52
   7 -13  -7   27.26    3.36
  -8  14   8    0.11    2.80
  -8  14   8   -0.74    2.28
 -14   8   8   44.88    4.53
  14  -8  -8   44.63    4.05
  14  -8  -8   54.39    5.04
   8 -14  -8   -1.36    2.35
   8 -14  -8    1.39    2.76
  -9  15   9   47.83    5.59
 -15   9   9   55.80    5.81
 -15   9   9   54.46    6.49
  15  -9  -9   46.30    4.59
  15  -9  -9   56.21    5.77
   9 -15  -9   48.50    4.48
   9 -15  -9   50.83    5.58
 -10  16  10   11.28    4.26
 -16  10  10    5.49    3.94
  16 -10 -10    4.56    3.21
  16 -10 -10    6.87    4.03
  10 -16 -10   11.02    3.37
  10 -16 -10   12.67    4.17
 -11  17  11  111.83    7.43
 -17  11  11   -1.89    3.74
  17 -11 -11   -1.73    3.22
  17 -11 -11    2.20    3.87
  11 -17 -11  107.92    7.13
  11 -17 -11  107.79    7.33
  12  -4 -11    0.50    3.37
  12  -4 -11    1.40    4.09
   4 -12 -11    8.24    4.26
  -4  12  11   10.57    4.46
  11  -3 -10   11.04    3.38
  11  -3 -10   16.48    3.86
   3 -11 -10    0.39    2.78
   3 -11 -10   -1.12    2.93
  10  -2  -9   31.83    3.81
  10  -2  -9   31.43    3.95
   2 -10  -9    0.22    2.41
   2 -10  -9   -0.37    2.54
  -2  10   9    1.78    2.71
 -10   2   9   42.55    4.43
   9  -1  -8   45.56    3.70
   9  -1  -8   51.05    4.74
   1  -9  -8  334.66    7.05
   1  -9  -8  361.53    8.39
  -1   9   8  389.41    8.74
  -9   1   8   53.43    4.15
   8   0  -7  122.01    4.52
   8   0  -7  144.05    5.41
   0  -8  -7  138.12    4.45
   0  -8  -7  146.58    5.10
   0   8   7  153.07    5.34
  -8   0   7  143.11    5.19
   7   1  -6   51.66    3.24
   7   1  -6   62.10    3.72
  -1  -7  -6   43.45    2.71
  -1  -7  -6   45.01    3.08
   1   7   6   47.60    3.63
  -7  -1   6   62.85    3.56
   6   2  -5   10.63    1.81
   6   2  -5   10.83    1.92
  -2  -6  -5  764.58    7.43
  -2  -6  -5  764.76    8.46
   2   6   5  823.33    9.06
  -6  -2   5   11.41    1.75
   5   3  -4  494.55    6.23
   5   3  -4  559.73    6.55
  -3  -5  -4   82.19    2.46
  -3  -5  -4   84.53    2.82
   3   5   4   92.20    3.14
  -5  -3   4  595.48    6.50
   4   4  -3  972.39    7.66
   4   4  -3 1094.00    7.89
  -4  -4  -3   19.35    1.28
  -4  -4  -3   20.59    1.36
   4   4   3   23.93    1.77
  -4  -4   3 1159.38    7.54
   3   5  -2   16.50    1.24
   3   5  -2   17.76    1.24
  -5  -3  -2    1.90    0.58
  -5  -3  -2    0.94    0.55
  -5  -3  -2    1.95    0.70
   5   3   2    0.46    0.65
  -3  -5   2   19.76    1.09
   2   6  -1 1713.85    8.12
   2   6  -1 1681.99    9.65
  -6  -2  -1  106.98    1.27
  -6  -2  -1   98.21    1.75
   6   2   1   98.70    1.54
   6   2   1   94.28    1.74
  -2  -6   1 2280.20   10.52
   1   7   0   80.28    1.81
   1   7   0   35.25    1.04
   7   1   0   90.75    1.65
  -1  -7   0   80.47    1.81
   0   8   1  755.63    4.94
   8   0  -1 1021.45    6.28
   8   0  -1 1110.69    4.93
   0  -8  -1 1068.58    6.52
   0  -8  -1  768.43    4.99
  -1   9   2 1998.11    9.64
  -1   9   2 2304.00    9.83
   9  -1  -2  245.45    3.77
   9  -1  -2  269.37    3.39
   1  -9  -2 2233.61   10.47
   1  -9  -2 2004.87    9.66
  -2  10   3  714.63    6.84
  -2  10   3  820.29    7.16
  10  -2  -3  351.30    5.06
  10  -2  -3  395.63    4.97
   2 -10  -3  743.86    6.86
   2 -10  -3  722.67    6.88
  -3  11   4  269.70    4.93
  -3  11   4  307.17    5.29
  11  -3  -4   27.49    2.22
  11  -3  -4   27.80    2.34
   3 -11  -4  297.24    4.99
   3 -11  -4  283.80    5.05
  -4  12   5   49.48    2.96
  -4  12   5   44.89    2.91
  12  -4  -5   59.74    3.12
  12  -4  -5   68.23    3.21
   4 -12  -5   42.15    2.90
   4 -12  -5   43.43    3.14
  -5  13   6   25.03    2.99
  -5  13   6   28.10    2.96
 -13   5   6   23.77    2.83
  13  -5  -6   24.50    2.84
  13  -5  -6   28.41    3.39
   5 -13  -6   21.71    2.55
   5 -13  -6   24.67    3.00
  -6  14   7  283.30    7.26
  -6  14   7  294.09    7.06
 -14   6   7    9.61    2.58
  14  -6  -7    6.21    2.27
  14  -6  -7    8.39    2.75
   6 -14  -7  278.98    6.71
   6 -14  -7  281.83    7.02
  -7  15   8    1.29    2.86
  -7  15   8    1.31    2.66
 -15   7   8  265.93    7.56
  15  -7  -8  241.23    7.32
  15  -7  -8  286.64    8.04
   7 -15  -8    0.56    2.45
   7 -15  -8    2.13    2.86
  -8  16   9   66.30    5.37
 -16   8   9  138.25   10.01
  16  -8  -9  105.68    5.76
  16  -8  -9  130.16    6.93
   8 -16  -9   57.78    5.17
   8 -16  -9   63.87    5.29
  -9  17  10  223.18    8.44
 -17   9  10    0.14    3.79
  17  -9 -10    2.04    3.43
  17  -9 -10    1.77    3.81
   9 -17 -10  201.82    7.40
   9 -17 -10  216.11    8.28
  13  -3 -11    0.45    3.43
  13  -3 -11   -3.00    3.93
   3 -13 -11    1.42    3.46
  -3  13  11   -1.86    3.48
  12  -2 -10    0.55    3.09
  12  -2 -10    1.59    3.61
   2 -12 -10    5.05    3.67
  -2  12  10    3.75    3.66
  11  -1  -9  126.93    6.01
  11  -1  -9  148.12    6.44
   1 -11  -9   28.23    3.42
   1 -11  -9   26.12    3.68
  -1  11   9   31.83    4.21
 -11   1   9  151.79    6.61
  10   0  -8  117.20    5.25
  10   0  -8  145.92    6.17
   0 -10  -8  138.95    5.20
   0 -10  -8  140.26    5.64
   0  10   8  149.20    6.25
 -10   0   8  146.49    5.84
   9   1  -7    6.56    2.06
   9   1  -7    6.35    2.27
  -1  -9  -7    3.69    1.87
  -1  -9  -7    2.33    1.99
   1   9   7    5.88    2.47
  -9  -1   7    6.47    2.27
   8   2  -6   73.63    3.75
   8   2  -6   88.56    3.90
  -2  -8  -6  135.00    4.04
  -2  -8  -6  140.43    4.66
   2   8   6  156.26    5.09
  -8  -2   6   92.19    3.98
   7   3  -5  191.79    4.62
   7   3  -5  225.34    5.07
  -3  -7  -5  289.76    4.84
  -3  -7  -5  286.25    5.31
   3   7   5  314.67    5.81
  -7  -3   5  229.05    4.88
   6   4  -4   39.86    2.45
   6   4  -4   43.89    2.33
  -4  -6  -4  707.48    6.34
  -4  -6  -4  689.35    7.03
   4   6   4  760.58    7.81
  -6  -4   4   47.39    2.33
   5   5  -3  534.13    6.03
   5   5  -3  587.38    5.88
  -5  -5  -3  603.38    5.08
  -5  -5  -3  584.57    5.48
   5   5   3  637.49    6.20
  -5  -5   3  625.62    5.56
   4   6  -2   21.11    1.48
   4   6  -2   22.04    1.34
  -6  -4  -2   14.95    1.04
  -6  -4  -2   15.76    1.05
  -6  -4  -2   15.02    1.23
   6   4   2   16.45    1.32
  -4  -6   2   24.44    1.17
   3   7  -1  116.52    2.49
   3   7  -1  113.72    1.97
  -7  -3  -1  215.92    1.72
  -7  -3  -1  213.08    2.62
   7   3   1  210.07    2.53
   7   3   1  190.94    2.53
  -3  -7   1  145.07    1.31
   2   8   0    1.84    0.73
   2   8   0    0.90    0.53
   8   2   0  201.97    2.71
   1   9   1  718.51    5.77
   1   9   1  444.78    3.94
   1   9   1  853.64    4.54
   9   1  -1   30.66    1.54
   9   1  -1   30.83    1.01
  -1  -9  -1  730.64    5.82
  -1  -9  -1  469.91    4.05
   0  10   2 1444.36    8.32
   0  10   2 1829.00    8.80
  10   0  -2 1565.65    9.60
  10   0  -2 1755.13    8.37
   0 -10  -2 1701.10    9.60
   0 -10  -2 1477.96    8.43
  -1  11   3   36.68    1.95
  -1  11   3   43.45    2.14
  11  -1  -3   11.84    1.47
  11  -1  -3   14.16    1.61
   1 -11  -3   36.33    1.98
   1 -11  -3   35.73    1.94
  -2  12   4   82.81    3.19
  -2  12   4   97.13    3.21
  12  -2  -4  201.45    4.57
  12  -2  -4  227.82    4.57
   2 -12  -4   85.91    3.01
   2 -12  -4   85.95    3.25
  -3  13   5    0.71    1.47
  -3  13   5    0.73    1.66
  13  -3  -5  323.68    6.23
  13  -3  -5  363.66    6.39
   3 -13  -5    0.40    1.35
   3 -13  -5    0.22    1.47
  -4  14   6  112.52    4.67
  -4  14   6  119.38    4.74
  14  -4  -6   41.87    3.64
  14  -4  -6   47.62    3.41
   4 -14  -6  111.50    4.42
   4 -14  -6  109.93    4.65
  -5  15   7    0.17    2.20
  -5  15   7    2.35    2.41
 -15   5   7   37.30    3.92
  15  -5  -7   33.70    3.95
  15  -5  -7   34.50    3.68
   5 -15  -7   -0.41    1.92
   5 -15  -7    0.90    2.19
  -6  16   8   18.16    3.49
  -6  16   8   21.69    3.51
 -16   6   8   53.69    4.72
  16  -6  -8   47.34    4.74
  16  -6  -8   62.43    5.23
   6 -16  -8   17.64    2.90
   6 -16  -8   17.65    3.44
  -7  17   9   29.29    4.38
  17  -7  -9   26.88    4.10
  17  -7  -9   34.89    4.55
   7 -17  -9   29.82    3.88
   7 -17  -9   36.90    4.56
  -8  18  10   64.88    6.62
 -18   8  10    6.97    3.70
  18  -8 -10    6.19    3.73
  18  -8 -10    6.33    3.70
   8 -18 -10   58.18    5.79
   8 -18 -10   71.15    6.64
  14  -2 -11    1.31    3.51
  14  -2 -11    2.07    4.03
   2 -14 -11    1.53    3.95
  -2  14  11    2.67    4.09
  13  -1 -10   13.20    3.67
  13  -1 -10   14.76    4.15
   1 -13 -10   36.78    4.85
  -1  13  10   33.94    4.81
  12   0  -9    3.94    2.60
  12   0  -9    1.80    2.87
   0 -12  -9    5.09    2.61
   0 -12  -9    6.07    3.19
   0  12   9    5.81    3.23
   0  12   9    3.11    3.08
 -12   0   9    2.75    2.87
  11   1  -8   59.35    4.17
  11   1  -8   74.96    5.16
  -1 -11  -8    4.56    2.26
  -1 -11  -8    5.12    2.73
   1  11   8    6.49    2.97
 -11  -1   8   74.47    4.84
  10   2  -7   48.47    3.58
  10   2  -7   70.43    4.13
  -2 -10  -7   76.30    3.75
  -2 -10  -7   69.61    4.36
   2  10   7   85.14    4.82
 -10  -2   7   62.62    4.08
   9   3  -6   32.01    2.90
   9   3  -6   38.50    3.11
  -3  -9  -6   12.23    1.89
  -3  -9  -6   15.25    2.32
   3   9   6   14.13    2.42
  -9  -3   6   39.51    3.18
   8   4  -5   40.54    2.78
   8   4  -5   44.18    3.02
  -4  -8  -5   69.30    2.83
  -4  -8  -5   66.83    3.14
   4   8   5   68.29    3.48
  -8  -4   5   48.26    2.83
   7   5  -4  652.26    7.72
   7   5  -4  733.35    7.66
  -5  -7  -4 1208.01    8.43
  -5  -7  -4 1187.39    9.16
   5   7   4 1268.97   10.02
  -7  -5   4  759.43    7.24
   6   6  -3  237.19    4.42
   6   6  -3  269.57    4.13
  -6  -6  -3    2.91    0.92
  -6  -6  -3    3.15    0.93
   6   6   3    3.22    1.11
  -6  -6   3  286.70    3.86
   5   7  -2   42.23    1.98
   5   7  -2   45.17    1.76
  -7  -5  -2    2.27    0.79
  -7  -5  -2    3.03    0.66
  -7  -5  -2    2.56    0.79
   7   5   2    2.03    0.79
   7   5   2    2.21    0.84
  -5  -7   2   50.91    1.44
   4   8  -1    0.22    0.81
   4   8  -1    1.13    0.60
  -8  -4  -1   27.16    0.75
  -8  -4  -1   30.85    1.26
   8   4   1   34.69    1.44
   8   4   1   27.29    0.74
  -4  -8   1    0.81    0.29
   3   9   0  101.23    2.49
   3   9   0   51.11    1.48
   9   3   0  209.14    3.07
   2  10   1   74.10    2.34
   2  10   1   39.04    1.42
   2  10   1   87.60    1.62
  10   2  -1 1644.46    9.18
  10   2  -1 1854.65    8.84
  -2 -10  -1   77.36    2.37
  -2 -10  -1   43.87    1.50
   1  11   2  159.10    2.97
   1  11   2  229.30    3.30
  11   1  -2  139.11    3.30
  11   1  -2  154.27    2.67
  -1 -11  -2  199.39    3.68
  -1 -11  -2  160.04    2.98
   0  12   3  210.92    3.91
   0  12   3  251.79    4.24
  12   0  -3  211.80    4.34
  12   0  -3  235.67    3.95
   0 -12  -3  231.54    4.30
   0 -12  -3  209.10    3.89
  -1  13   4  981.21    9.18
  -1  13   4 1108.89    9.58
  13  -1  -4   92.87    3.66
  13  -1  -4  109.72    3.44
   1 -13  -4 1046.26    9.46
   1 -13  -4  989.95    9.21
  -2  14   5   33.53    2.96
  -2  14   5   35.96    3.03
  14  -2  -5    0.87    1.58
  14  -2  -5    1.49    1.65
   2 -14  -5   27.20    2.75
   2 -14  -5   27.04    2.87
  -3  15   6  641.88    9.24
  -3  15   6  739.88    9.93
  15  -3  -6   67.11    3.87
  15  -3  -6   69.66    3.77
   3 -15  -6  669.35    9.13
   3 -15  -6  660.66    9.37
  -4  16   7   54.23    4.43
  -4  16   7   55.73    4.07
 -16   4   7   42.37    4.02
  16  -4  -7   38.08    4.20
  16  -4  -7   39.40    4.23
   4 -16  -7   48.85    4.02
   4 -16  -7   56.05    4.48
  -5  17   8   19.76    3.54
  -5  17   8   20.84    3.50
 -17   5   8   24.55    3.42
  17  -5  -8   19.36    3.25
  17  -5  -8   25.76    3.82
   5 -17  -8   18.54    3.25
   5 -17  -8   18.19    3.43
  -6  18   9   81.49    6.23
  18  -6  -9   60.39    5.72
  18  -6  -9   71.36    5.54
   6 -18  -9   90.67    5.29
   6 -18  -9   96.16    6.38
  -7  19  10   14.32    3.99
 -19   7  10   39.72    5.31
  19  -7 -10   39.16    5.03
  19  -7 -10   50.17    5.58
   7 -19 -10   17.37    3.98
   7 -19 -10   14.76    3.93
  15  -1 -11   13.16    4.17
  15  -1 -11   23.61    5.00
   1 -15 -11   41.66    5.52
  -1  15  11   45.66    5.65
  14   0 -10    5.64    3.48
  14   0 -10    8.43    3.57
   0 -14 -10    8.81    3.83
   0  14  10    5.81    3.75
  13   1  -9   56.82    4.69
  13   1  -9   66.37    5.74
  -1 -13  -9    7.25    2.98
   1  13   9   10.80    3.15
   1  13   9    7.08    3.15
 -13  -1   9   70.76    5.39
  12   2  -8   87.83    5.15
  12   2  -8  108.00    5.31
  -2 -12  -8  118.06    4.82
  -2 -12  -8  119.01    5.68
   2  12   8  116.67    5.65
   2  12   8  129.39    6.07
 -12  -2   8  116.08    5.45
  11   3  -7   57.57    4.23
  11   3  -7   62.74    4.42
  -3 -11  -7   47.50    3.36
  -3 -11  -7   46.82    4.00
   3  11   7   50.52    4.39
 -11  -3   7   62.76    4.06
  10   4  -6   97.68    4.19
  10   4  -6  115.07    4.35
  -4 -10  -6   44.46    2.89
  -4 -10  -6   46.38    3.40
   4  10   6   50.63    3.85
 -10  -4   6  109.31    4.23
   9   5  -5  203.80    5.08
   9   5  -5  230.25    5.20
  -5  -9  -5   53.94    2.77
  -5  -9  -5   53.75    2.75
   5   9   5   55.72    3.33
  -9  -5   5  233.79    4.87
   8   6  -4    0.31    1.27
   8   6  -4    1.47    1.29
  -6  -8  -4   31.24    1.99
  -6  -8  -4   30.43    2.12
   6   8   4   30.71    2.50
  -8  -6   4    1.61    1.11
   7   7  -3  242.59    4.62
   7   7  -3  285.29    4.36
  -7  -7  -3  120.69    2.78
  -7  -7  -3  110.76    2.63
   7   7   3  127.47    3.17
  -7  -7   3  283.63    3.84
   6   8  -2   -0.16    0.92
   6   8  -2    1.54    0.80
  -8  -6  -2   23.03    1.50
  -8  -6  -2   24.90    1.21
  -8  -6  -2   25.25    1.47
   8   6   2   25.17    1.55
   8   6   2   24.55    1.20
   8   6   2   25.72    1.65
  -6  -8   2    0.78    0.56
   5   9  -1  208.15    3.85
   5   9  -1  204.76    2.81
  -9  -5  -1  368.87    2.19
  -9  -5  -1  523.26    4.30
   9   5   1  519.69    4.84
   9   5   1  364.74    2.18
  -5  -9   1  236.94    1.47
   4  10   0  187.81    3.50
   4  10   0  103.62    2.03
  10   4   0  799.14    6.25
   3  11   1  167.94    3.36
   3  11   1   76.32    1.88
   3  11   1  196.81    2.32
  11   3  -1  351.49    4.62
  11   3  -1  391.05    2.97
  -3 -11  -1  168.63    3.35
   2  12   2    0.99    0.74
   2  12   2    1.03    0.80
  12   2  -2  140.53    3.50
  12   2  -2  154.20    2.70
  -2 -12  -2    2.42    1.03
  -2 -12  -2    0.19    0.74
   1  13   3  113.65    3.10
   1  13   3  143.06    3.37
  13   1  -3  445.28    6.41
  13   1  -3  489.27    5.55
  -1 -13  -3  129.02    3.55
  -1 -13  -3  117.96    3.16
   0  14   4    7.57    1.49
   0  14   4    9.00    1.71
  14   0  -4   11.32    2.03
  14   0  -4   10.74    1.71
   0 -14  -4   11.84    1.87
   0 -14  -4    6.90    1.50
  -1  15   5  536.51    7.83
  -1  15   5  598.35    8.14
  15  -1  -5    7.92    2.19
  15  -1  -5    5.89    1.90
   1 -15  -5  546.26    7.76
   1 -15  -5  537.99    7.83
  -2  16   6  104.55    4.66
  -2  16   6  123.08    4.83
  16  -2  -6   19.86    2.69
  16  -2  -6   28.53    3.39
   2 -16  -6  111.74    4.52
   2 -16  -6  109.60    4.73
  -3  17   7   82.15    4.92
  -3  17   7  100.21    5.17
 -17   3   7    2.34    2.13
  17  -3  -7    0.27    2.19
  17  -3  -7   -0.85    2.43
   3 -17  -7   83.78    4.64
   3 -17  -7   86.90    4.98
  -4  18   8  168.43    6.42
  -4  18   8  189.28    6.61
 -18   4   8    9.62    2.87
  18  -4  -8    8.32    2.83
  18  -4  -8    9.00    2.93
   4 -18  -8  172.54    5.99
   4 -18  -8  178.04    6.50
  -5  19   9   26.06    4.29
  19  -5  -9   47.86    5.54
  19  -5  -9   61.21    5.99
   5 -19  -9   28.79    3.88
   5 -19  -9   26.45    4.21
  -6  20  10    8.11    4.06
 -20   6  10    3.64    3.55
  20  -6 -10    6.48    3.88
  20  -6 -10    7.76    3.65
   6 -20 -10    1.92    3.40
   6 -20 -10    1.53    3.64
  15   1 -10    8.28    3.29
  15   1 -10    8.44    3.83
  -1 -15 -10   19.82    3.83
   1  15  10   19.51    3.89
  14   2  -9   28.20    3.78
  14   2  -9   42.05    4.64
  -2 -14  -9   12.32    3.47
   2  14   9    7.49    3.38
 -14  -2   9   43.27    4.93
  13   3  -8   39.06    4.55
  13   3  -8   48.51    4.83
  -3 -13  -8   -0.44    2.09
  -3 -13  -8    2.66    2.64
   3  13   8    1.08    2.65
   3  13   8   -0.71    2.67
 -13  -3   8   48.53    4.40
  12   4  -7   52.60    4.29
  12   4  -7   58.15    4.02
  -4 -12  -7   36.23    3.25
  -4 -12  -7   39.21    3.88
   4  12   7   43.94    3.95
   4  12   7   44.04    4.33
 -12  -4   7   54.03    3.90
  11   5  -6   -0.10    1.78
  11   5  -6   -2.11    2.00
  -5 -11  -6   30.68    2.77
  -5 -11  -6   27.30    3.02
   5  11   6   27.12    3.04
   5  11   6   31.29    3.50
 -11  -5   6    1.18    1.71
  10   6  -5  319.02    6.42
  10   6  -5  368.29    6.41
  -6 -10  -5  262.76    4.90
  -6 -10  -5  251.76    5.15
   6  10   5  247.72    5.12
   6  10   5  277.43    5.80
 -10  -6   5  375.34    5.98
   9   7  -4  196.76    4.81
   9   7  -4  224.26    4.58
  -7  -9  -4  108.71    3.09
  -7  -9  -4  105.65    3.11
   7   9   4  107.07    3.12
   7   9   4  121.06    3.70
  -9  -7   4  231.27    4.21
   8   8  -3   35.27    2.39
   8   8  -3   42.77    2.17
  -8  -8  -3  590.96    5.90
  -8  -8  -3  552.70    5.39
   8   8   3  592.87    5.90
   8   8   3  550.23    5.37
   8   8   3  624.76    6.47
  -8  -8   3   40.69    1.81
   7   9  -2   27.65    2.04
   7   9  -2   32.01    1.71
  -9  -7  -2  265.34    3.00
   9   7   2  290.58    4.02
   9   7   2  271.71    3.04
   9   7   2  296.65    4.00
  -7  -9   2   34.62    1.29
   6  10  -1  233.73    4.32
   6  10  -1  228.14    3.08
 -10  -6  -1  625.53    4.86
  10   6   1  625.48    5.74
  10   6   1  305.07    1.99
   5  11   0   12.53    1.55
   5  11   0    5.94    0.85
  11   5   0  262.85    3.97
   4  12   1   59.19    2.50
   4  12   1   27.05    1.31
   4  12   1   69.54    1.54
  12   4  -1  764.19    7.17
  12   4  -1  858.36    4.35
  -4 -12  -1   61.97    2.50
   3  13   2  158.86    3.63
   3  13   2  111.83    2.66
   3  13   2  185.34    3.05
  13   3  -2  387.61    5.71
  13   3  -2  417.21    4.21
  -3 -13  -2  162.81    3.67
  -3 -13  -2  113.38    2.71
   2  14   3  270.08    4.51
   2  14   3  357.64    4.98
  14   2  -3  264.94    5.30
  14   2  -3  282.74    4.35
  -2 -14  -3  321.12    5.28
  -2 -14  -3  271.10    4.52
   1  15   4  259.06    5.09
   1  15   4  316.02    5.50
  15   1  -4   98.10    3.80
  15   1  -4  111.89    3.49
  -1 -15  -4  276.03    5.31
  -1 -15  -4  261.85    5.11
   0  16   5   47.20    3.02
   0  16   5   56.11    3.57
  16   0  -5   48.01    3.42
  16   0  -5   54.12    3.32
   0 -16  -5   48.56    3.10
   0 -16  -5   46.17    3.00
  -1  17   6   28.11    3.42
  -1  17   6   35.07    3.62
  17  -1  -6   22.72    2.87
  17  -1  -6   26.48    3.01
   1 -17  -6   34.37    3.54
   1 -17  -6   31.02    3.16
  -2  18   7   30.37    3.50
  -2  18   7   34.07    4.22
 -18   2   7    2.83    2.18
  18  -2  -7    6.71    2.57
  18  -2  -7    4.15    2.59
   2 -18  -7   29.68    3.35
   2 -18  -7   29.25    3.49
  -3  19   8   17.38    3.47
  -3  19   8   23.78    3.68
 -19   3   8   13.61    2.94
  19  -3  -8   15.22    3.24
  19  -3  -8   17.78    3.58
   3 -19  -8   18.81    3.35
   3 -19  -8   19.69    3.47
  -4  20   9   71.92    5.51
  20  -4  -9   62.29    5.41
  20  -4  -9   72.87    5.59
   4 -20  -9   82.25    5.74
   4 -20  -9   69.25    5.46
  -5  21  10    1.92    3.71
 -21   5  10    3.09    3.94
  21  -5 -10    4.93    3.50
  21  -5 -10    7.33    4.04
   5 -21 -10    2.17    3.33
   5 -21 -10   -2.21    3.47
  16   2 -10    6.49    3.69
  16   2 -10   11.05    4.06
  -2 -16 -10   52.26    6.00
   2  16  10   43.54    5.04
  15   3  -9   31.10    4.29
  15   3  -9   33.01    4.33
  -3 -15  -9    6.74    3.31
   3  15   9    6.11    3.34
 -15  -3   9   40.22    4.83
  14   4  -8  155.51    6.20
  14   4  -8  186.64    6.79
  -4 -14  -8   12.07    2.74
   4  14   8   10.09    2.68
   4  14   8   12.47    3.14
 -14  -4   8  184.41    6.31
  13   5  -7   33.71    4.17
  13   5  -7   40.69    4.15
  -5 -13  -7   48.05    3.56
  -5 -13  -7   45.96    3.98
   5  13   7   41.84    3.90
   5  13   7   50.03    4.41
 -13  -5   7   39.75    3.71
  12   6  -6    3.52    2.07
  12   6  -6    4.79    2.22
  -6 -12  -6    2.85    1.77
  -6 -12  -6    3.07    1.90
   6  12   6    4.09    1.94
   6  12   6    3.30    2.14
 -12  -6   6    3.92    1.84
  11   7  -5    6.97    2.21
  11   7  -5   10.17    2.06
  -7 -11  -5  298.48    5.42
  -7 -11  -5  284.00    5.46
   7  11   5  284.85    5.47
   7  11   5  323.24    6.25
 -11  -7   5   10.91    1.80
  10   8  -4    1.93    1.56
  10   8  -4    2.64    1.47
  -8 -10  -4   86.80    3.01
  -8 -10  -4   85.63    2.89
   8  10   4   81.17    2.84
   8  10   4   94.47    3.44
 -10  -8   4    1.39    1.19
   9   9  -3  246.63    5.15
   9   9  -3  284.32    4.54
  -9  -9  -3   26.15    1.96
  -9  -9  -3   24.98    1.67
   9   9   3   26.61    1.97
   9   9   3   22.41    1.64
   9   9   3   26.03    2.21
  -9  -9   3  294.49    3.88
   8  10  -2   75.65    3.01
   8  10  -2   86.08    2.41
 -10  -8  -2   96.73    1.92
  10   8   2  116.10    2.94
  10   8   2  100.68    1.95
  10   8   2  116.55    2.81
  -8 -10   2   91.03    1.80
   7  11  -1  457.54    6.13
   7  11  -1  463.15    4.38
 -11  -7  -1   47.89    1.68
  11   7   1   44.91    2.11
  11   7   1   21.59    0.72
   6  12   0  155.80    3.79
   6  12   0  101.75    2.19
  12   6   0  270.71    4.40
   5  13   1   17.98    2.11
   5  13   1    8.71    0.97
   5  13   1   21.93    1.13
  13   5  -1  148.48    3.66
  13   5  -1  160.75    2.00
   4  14   2  226.51    4.56
   4  14   2  142.37    2.99
   4  14   2  258.79    3.59
  14   4  -2  435.73    6.31
  14   4  -2  486.29    4.56
  -4 -14  -2  227.84    4.58
  -4 -14  -2  150.18    3.08
   3  15   3    8.95    1.37
   3  15   3   10.86    1.47
  15   3  -3  133.82    4.23
  15   3  -3  148.20    3.33
  -3 -15  -3   12.35    1.89
  -3 -15  -3    9.09    1.39
   2  16   4  502.81    6.88
   2  16   4  636.17    7.56
  16   2  -4    0.29    1.78
  16   2  -4    1.13    1.39
  -2 -16  -4  577.13    7.78
  -2 -16  -4  498.26    6.85
   1  17   5   99.14    4.05
   1  17   5  124.02    4.39
  17   1  -5  109.27    4.53
  17   1  -5  120.55    4.22
  -1 -17  -5  108.05    4.33
  -1 -17  -5   98.00    4.04
   0  18   6   63.38    4.08
   0  18   6   78.25    4.36
  18   0  -6   61.02    4.16
  18   0  -6   69.97    4.11
   0 -18  -6   66.40    4.16
   0 -18  -6   67.46    4.14
  -1  19   7   25.30    3.14
  -1  19   7   25.51    3.24
 -19   1   7  115.73    5.12
  19  -1  -7  112.82    5.44
  19  -1  -7  139.43    5.67
   1 -19  -7   28.64    3.40
   1 -19  -7   25.40    3.15
  -2  20   8   40.36    4.90
  -2  20   8   46.33    5.09
 -20   2   8   39.74    4.42
  20  -2  -8   36.85    4.33
  20  -2  -8   40.84    4.95
   2 -20  -8   42.04    4.63
   2 -20  -8   39.41    4.91
  -3  21   9   10.64    3.74
  21  -3  -9    6.52    3.60
  21  -3  -9    4.51    3.21
   3 -21  -9   11.73    3.54
   3 -21  -9    6.79    3.58
  -4  22  10    1.01    3.34
 -22   4  10   58.28    6.62
  22  -4 -10   62.07    6.03
  22  -4 -10   68.14    6.77
   4 -22 -10    0.72    3.26
  17   3 -10   29.09    4.63
  17   3 -10   31.42    4.69
  -3 -17 -10   10.00    3.76
   3  17  10    9.58    3.77
  16   4  -9   67.75    5.88
  16   4  -9   76.72    6.09
  -4 -16  -9   69.43    5.60
   4  16   9   70.63    5.62
 -16  -4   9   76.96    5.52
  15   5  -8  120.91    5.88
  15   5  -8  146.34    6.34
  -5 -15  -8   74.65    5.03
   5  15   8   74.01    5.01
   5  15   8   80.30    5.51
 -15  -5   8  143.73    6.01
  14   6  -7    2.04    2.64
  14   6  -7    1.16    2.39
  -6 -14  -7  102.22    4.59
  -6 -14  -7  103.56    4.80
   6  14   7   99.88    4.77
   6  14   7  117.48    5.43
 -14  -6   7    1.91    2.06
  13   7  -6   31.90    3.52
  13   7  -6   39.27    3.65
  -7 -13  -6  231.67    5.39
  -7 -13  -6  216.03    5.50
   7  13   6  219.75    5.56
   7  13   6  250.41    6.31
 -13  -7   6   43.08    3.42
  12   8  -5   34.79    3.60
  12   8  -5   32.38    3.06
  -8 -12  -5   10.84    1.94
  -8 -12  -5   10.99    1.90
   8  12   5   10.52    1.91
   8  12   5   12.92    2.24
 -12  -8   5   34.34    2.73
  11   9  -4  272.04    6.00
  11   9  -4  303.86    5.35
  -9 -11  -4  191.94    4.35
  -9 -11  -4  172.03    3.79
   9  11   4  183.73    4.25
   9  11   4  176.36    3.83
   9  11   4  203.96    4.63
 -11  -9   4  303.67    4.78
  10  10  -3    0.33    1.45
  10  10  -3    0.22    1.15
 -10 -10  -3    0.57    1.22
 -10 -10  -3    0.87    0.91
  10  10   3    1.11    1.24
  10  10   3    1.04    0.94
  10  10   3    0.50    1.24
 -10 -10   3    0.00    0.84
   9  11  -2  121.25    3.80
   9  11  -2  127.93    2.88
 -11  -9  -2  171.68    2.46
  11   9   2  235.08    4.23
  11   9   2  171.06    2.46
  11   9   2  217.70    3.69
  -9 -11   2  134.15    2.07
   8  12  -1  425.15    6.26
   8  12  -1  441.02    4.43
 -12  -8  -1   13.11    1.30
  12   8   1   13.68    1.60
  12   8   1    8.25    0.65
   7  13   0  561.73    7.03
   7  13   0  395.84    4.08
 -13  -7   0   80.33    1.94
  13   7   0  101.02    3.05
   6  14   1  370.26    5.82
   6  14   1  175.04    2.99
   6  14   1  385.06    3.22
  14   6  -1  129.54    3.57
  14   6  -1  138.80    1.90
   5  15   2  148.19    4.08
   5  15   2   81.29    2.41
   5  15   2  167.88    3.06
  15   5  -2  471.44    6.78
  15   5  -2  537.89    4.81
  -5 -15  -2  144.91    4.03
  -5 -15  -2   88.24    2.53
   4  16   3   71.70    3.35
   4  16   3   54.28    2.50
   4  16   3   77.93    2.81
  16   4  -3  165.70    4.65
  16   4  -3  187.15    3.70
  -4 -16  -3   73.23    3.38
  -4 -16  -3   56.37    2.58
   3  17   4   88.48    3.41
   3  17   4  119.34    3.76
  17   3  -4    8.57    2.07
  17   3  -4   12.86    1.85
  -3 -17  -4  105.97    4.13
  -3 -17  -4   90.15    3.43
   2  18   5    0.03    1.71
   2  18   5    2.00    1.88
  18   2  -5    8.02    2.30
  18   2  -5    8.92    2.01
  -2 -18  -5   -1.73    1.81
  -2 -18  -5    1.01    1.77
   1  19   6    0.84    2.09
   1  19   6    1.11    2.23
  19   1  -6   91.52    5.22
  19   1  -6  103.69    4.80
  -1 -19  -6    1.53    2.30
  -1 -19  -6    0.58    2.07
   0  20   7    0.52    2.50
   0  20   7    2.45    2.58
 -20   0   7   -0.76    2.11
  20   0  -7   -2.19    2.60
  20   0  -7   -0.92    2.41
   0 -20  -7   -1.04    2.47
   0 -20  -7    0.30    2.48
  -1  21   8    8.33    3.22
  -1  21   8   10.43    3.30
 -21   1   8    5.03    2.77
  21  -1  -8    6.29    3.06
  21  -1  -8    5.32    3.11
   1 -21  -8    7.60    3.08
   1 -21  -8   13.16    3.34
  -2  22   9   12.14    3.48
  22  -2  -9   26.59    4.57
  22  -2  -9   35.28    4.72
   2 -22  -9   12.99    3.71
   2 -22  -9   13.20    3.74
  -3  23  10    0.60    3.83
 -23   3  10   21.86    4.54
  23  -3 -10   17.90    4.25
  23  -3 -10   19.13    4.21
   3 -23 -10   -1.00    3.63
  18   4 -10    3.22    3.32
  18   4 -10   -1.51    3.53
  -4 -18 -10   59.80    6.07
   4  18  10   60.12    6.17
  17   5  -9   97.67    6.12
  17   5  -9  121.34    6.82
  -5 -17  -9   77.19    5.22
   5  17   9   72.69    5.19
  16   6  -8   43.08    4.66
  16   6  -8   57.68    5.12
  -6 -16  -8   15.42    3.16
   6  16   8   15.12    3.21
   6  16   8   13.86    3.42
 -16  -6   8   58.42    6.77
  15   7  -7   23.39    3.40
  15   7  -7   26.29    3.28
  -7 -15  -7   81.66    4.51
   7  15   7   79.35    4.48
   7  15   7   87.43    5.02
 -15  -7   7   26.50    2.97
  14   8  -6   55.69    4.54
  14   8  -6   62.39    4.04
  -8 -14  -6    1.03    1.97
  -8 -14  -6    0.69    1.82
   8  14   6   -1.12    1.79
   8  14   6    0.28    2.20
 -14  -8   6   58.80    3.66
  13   9  -5   15.55    2.60
  13   9  -5   16.22    2.28
  -9 -13  -5    1.85    1.74
  -9 -13  -5    3.03    1.59
   9  13   5    2.00    1.69
   9  13   5    2.47    1.57
   9  13   5    2.89    1.92
 -13  -9   5   19.20    2.14
  12  10  -4  106.66    4.34
  12  10  -4  118.45    3.73
 -10 -12  -4   20.75    2.46
 -10 -12  -4   16.71    1.79
  10  12   4   20.16    2.45
  10  12   4   18.37    2.10
  10  12   4   19.89    2.20
 -12 -10   4  123.31    3.32
  11  11  -3   66.84    3.48
  11  11  -3   81.77    2.94
 -11 -11  -3    9.06    1.19
  11  11   3   12.65    1.82
  11  11   3    8.90    1.17
  11  11   3   11.94    1.64
 -11 -11   3   84.29    2.37
  10  12  -2    4.78    1.68
  10  12  -2    5.69    1.17
 -12 -10  -2   24.06    1.23
  12  10   2   35.02    2.54
  12  10   2   19.63    1.14
 -10 -12   2    4.83    0.73
   9  13  -1  471.40    6.91
   9  13  -1  496.33    4.84
 -13  -9  -1  217.35    3.25
  13   9   1  201.28    4.27
   8  14   0   52.92    2.84
   8  14   0   41.04    1.79
 -14  -8   0  188.83    2.87
  14   8   0  230.69    4.69
   7  15   1  358.69    5.94
   7  15   1  180.78    3.12
   7  15   1  327.55    2.99
  15   7  -1  261.96    5.11
  15   7  -1  283.36    2.58
   6  16   2  183.11    4.68
   6  16   2   93.57    2.62
   6  16   2  204.14    3.32
  16   6  -2   15.98    2.17
  16   6  -2   14.44    1.49
  -6 -16  -2  189.30    4.72
   5  17   3    8.02    1.99
   5  17   3    5.16    1.29
   5  17   3    8.40    1.53
  17   5  -3  416.30    7.18
  17   5  -3  456.01    5.46
  -5 -17  -3    7.46    1.98
  -5 -17  -3    5.04    1.35
   4  18   4  339.92    6.55
   4  18   4  280.93    5.38
   4  18   4  392.28    6.19
  18   4  -4  308.82    6.75
  18   4  -4  337.55    5.58
  -4 -18  -4  353.46    6.70
  -4 -18  -4  278.55    5.37
   3  19   5  214.73    5.38
   3  19   5  272.99    6.07
  19   3  -5   10.33    2.45
  19   3  -5   11.30    2.15
  -3 -19  -5  249.32    6.19
  -3 -19  -5  208.17    5.33
   2  20   6   78.61    4.33
   2  20   6   94.68    4.93
  20   2  -6  289.31    7.82
  20   2  -6  313.03    6.85
  -2 -20  -6   90.64    4.79
  -2 -20  -6   81.65    4.35
   1  21   7    2.95    2.52
   1  21   7    0.91    2.54
 -21  -1   7    0.30    2.17
  21   1  -7   -0.49    2.54
  21   1  -7   -0.65    2.44
  -1 -21  -7    1.35    2.55
  -1 -21  -7    3.15    2.53
   0  22   8   -0.56    2.50
   0  22   8    2.19    3.08
 -22   0   8    0.97    2.55
  22   0  -8   -1.34    3.14
  22   0  -8   -0.17    2.90
   0 -22  -8    2.59    3.04
   0 -22  -8    1.55    2.58
  -1  23   9   55.42    5.27
  23  -1  -9   -0.21    3.62
  23  -1  -9    2.73    3.50
   1 -23  -9   59.78    5.34
  19   5 -10   12.80    4.29
  19   5 -10   11.76    4.29
   5  19  10    1.01    4.39
  18   6  -9    0.00    3.38
  18   6  -9    0.40    3.35
  -6 -18  -9   31.82    4.25
   6  18   9   34.14    4.32
  17   7  -8   -1.16    2.70
  17   7  -8    4.04    3.02
  -7 -17  -8   11.65    3.01
   7  17   8   12.52    3.08
   7  17   8   12.74    3.27
  16   8  -7   61.02    5.23
  16   8  -7   77.50    4.81
  -8 -16  -7   28.37    3.18
   8  16   7   29.75    3.26
   8  16   7   34.39    3.70
  15   9  -6   10.49    2.98
  15   9  -6    7.56    2.48
  -9 -15  -6  111.69    4.62
  -9 -15  -6  102.40    4.35
   9  15   6  115.51    4.44
   9  15   6  102.65    4.40
   9  15   6  126.88    5.12
  14  10  -5  167.86    5.70
  14  10  -5  186.02    5.18
 -10 -14  -5  168.38    4.74
 -10 -14  -5  152.91    4.33
  10  14   5  162.73    4.67
  10  14   5  153.92    4.37
  10  14   5  187.29    5.33
  13  11  -4    6.62    2.18
  13  11  -4   12.63    1.90
 -11 -13  -4  139.68    4.15
 -11 -13  -4  122.17    3.41
  11  13   4  140.32    4.16
  11  13   4  117.42    3.35
  11  13   4  150.83    4.37
 -13 -11   4   10.93    1.55
  12  12  -3  363.42    7.00
  12  12  -3  402.31    5.55
 -12 -12  -3  195.53    3.37
  12  12   3  259.02    5.19
  12  12   3  192.03    3.32
  12  12   3  252.46    4.70
 -12 -12   3  405.30    4.40
  11  13  -2  255.41    5.73
  11  13  -2  296.80    4.31
  13  11   2    4.04    1.63
  13  11   2    1.90    0.64
 -11 -13   2  299.03    2.74
  10  14  -1   53.52    3.40
  10  14  -1   55.17    2.06
 -14 -10  -1   58.81    2.03
  14  10   1   54.57    2.95
   9  15   0  100.56    3.93
   9  15   0   74.18    2.22
 -15  -9   0    5.78    0.93
  15   9   0    6.83    1.77
   8  16   1  168.57    4.53
   8  16   1   85.07    2.41
  16   8  -1   32.26    2.90
  16   8  -1   34.18    1.19
   7  17   2   22.74    2.59
   7  17   2    9.61    1.28
   7  17   2   24.75    1.79
  17   7  -2   35.11    2.89
  17   7  -2   38.48    1.79
   6  18   3    6.28    2.12
   6  18   3    3.20    1.26
   6  18   3    6.59    1.53
  18   6  -3  196.04    5.40
  18   6  -3  209.54    3.95
  -6 -18  -3    5.96    2.13
  -6 -18  -3    4.58    1.36
   5  19   4    8.96    2.33
   5  19   4    6.51    1.65
   5  19   4   10.59    1.92
  19   5  -4   36.88    3.84
  19   5  -4   36.09    2.73
  -5 -19  -4    8.25    2.34
  -5 -19  -4    7.31    1.71
   4  20   5    4.40    1.85
   4  20   5    5.77    2.12
  20   4  -5    3.02    2.51
  20   4  -5    2.88    1.88
  -4 -20  -5    6.44    2.46
  -4 -20  -5    4.49    1.90
   3  21   6   34.18    3.57
   3  21   6   51.88    4.08
  21   3  -6    2.51    2.54
  21   3  -6    1.16    2.16
  -3 -21  -6   47.10    4.27
  -3 -21  -6   43.22    3.73
   2  22   7   27.88    3.41
   2  22   7   42.19    4.84
 -22  -2   7  121.87    5.40
  22   2  -7  110.59    5.92
  22   2  -7  120.69    5.56
  -2 -22  -7   35.90    4.48
  -2 -22  -7   37.93    4.15
   1  23   8   47.97    5.04
   1  23   8   63.09    5.38
  23   1  -8    2.43    3.07
  23   1  -8    2.71    2.96
  -1 -23  -8   54.30    5.22
  -1 -23  -8   50.29    5.04
   0  24   9    2.04    3.25
  24   0  -9    0.32    3.29
  24   0  -9    2.18    3.55
   0 -24  -9    0.76    3.14
  19   7  -9   30.52    4.49
  19   7  -9   34.28    4.41
  18   8  -8    3.21    3.45
  18   8  -8    3.39    2.97
   8  18   8   10.45    3.38
  17   9  -7   -0.41    2.93
  17   9  -7    0.08    2.53
   9  17   7    7.08    2.90
  16  10  -6   21.06    3.53
  16  10  -6   26.41    3.11
  10  16   6  255.81    7.74
  10  16   6  269.11    6.84
  15  11  -5   78.42    4.60
  15  11  -5   88.28    3.97
 -11 -15  -5   21.33    2.68
  11  15   5   22.32    2.68
  11  15   5   18.44    2.60
  14  12  -4    6.21    2.29
  14  12  -4    5.50    1.79
 -12 -14  -4  385.98    6.52
  12  14   4  381.62    6.52
  12  14   4  380.20    6.34
  13  13  -3   74.04    4.03
  13  13  -3   82.76    3.12
  13  13   3   99.48    3.78
  13  13   3   91.14    3.30
  12  14  -2  559.38    8.62
  12  14  -2  624.61    6.15
  14  12   2    7.03    1.83
  11  15  -1   61.12    3.77
  11  15  -1   69.69    2.32
  15  11   1  447.28    6.78
  10  16   0   46.30    3.45
  10  16   0   39.13    1.93
  16  10   0    0.61    1.64
   9  17   1   73.84    3.83
   9  17   1   41.01    2.02
  17   9  -1   10.95    2.20
   8  18   2    6.17    2.13
   8  18   2    4.04    1.14
   8  18   2    7.22    1.29
  18   8  -2   39.07    3.16
   7  19   3   20.03    2.71
   7  19   3   13.18    1.63
   7  19   3   23.86    2.32
  19   7  -3   50.19    3.99
  -7 -19  -3   20.39    2.68
   6  20   4   94.95    4.22
   6  20   4   64.63    3.20
   6  20   4  101.61    3.80
  20   6  -4  105.92    5.15
  -6 -20  -4   92.58    4.22
  -6 -20  -4   68.61    3.32
   5  21   5   22.11    3.01
   5  21   5   16.26    2.34
   5  21   5   20.09    2.62
  21   5  -5   21.44    3.44
  21   5  -5   19.54    3.80
  -5 -21  -5   23.27    3.08
  -5 -21  -5   13.13    2.22
   4  22   6  133.48    5.09
   4  22   6  180.12    5.75
  22   4  -6    0.95    2.88
  -4 -22  -6  160.55    5.96
  -4 -22  -6  135.39    5.11
   3  23   7    3.09    2.53
   3  23   7    7.35    2.93
  23   3  -7  201.92    7.44
  -3 -23  -7    7.41    3.01
  -3 -23  -7    4.73    2.60
   2  24   8   44.87    4.92
  24   2  -8    7.90    3.89
  -2 -24  -8   51.42    4.97
   1  25   9   13.90    3.89
  25   1  -9   74.93    6.37
  -1 -25  -9   16.85    4.54
  20   8  -9   15.53    4.38
  19   9  -8   10.14    3.49
  18  10  -7    7.48    3.11
  18  10  -7    0.79    4.74
  10  18   7    0.38    2.73
  17  11  -6  340.38    8.58
  17  11  -6  397.33    9.00
  11  17   6   22.12    3.07
  16  12  -5   37.80    4.53
  16  12  -5   36.28    3.51
 -12 -16  -5   81.18    4.05
  12  16   5   83.39    4.10
  12  16   5   84.35    4.10
  15  13  -4   12.07    2.68
  15  13  -4   16.17    2.45
  13  15   4   80.18    3.91
  13  15   4   74.82    3.64
  14  14  -3  193.62    5.86
  14  14  -3  230.96    6.59
  14  14   3  188.78    5.01
  14  14   3  165.46    4.08
  13  15  -2   40.13    3.82
  15  13   2  134.17    4.39
  12  16  -1   40.79    3.73
  16  12   1    1.63    1.78
  11  17   0   12.27    2.49
  17  11   0  148.23    4.73
  10  18   1  113.22    4.33
  18  10  -1   32.87    3.41
   9  19   2  374.88    7.22
  19   9  -2   62.98    4.08
   8  20   3   29.02    3.13
  20   8  -3    1.06    2.36
  -8 -20  -3   32.15    3.58
   7  21   4   39.96    3.89
   7  21   4   26.40    3.65
  21   7  -4    1.01    2.28
  -7 -21  -4   35.45    3.81
   6  22   5    4.22    2.49
  22   6  -5   15.59    3.13
  -6 -22  -5    6.36    2.58
   5  23   6    7.33    2.76
  23   5  -6  100.20    6.15
  -5 -23  -6    9.20    2.87
  24   4  -7   31.55    4.28
  -4 -24  -7   22.03    3.58
  25   3  -8  206.67    8.69
  26   2  -9    5.77    3.79
  21   9  -9   10.84    4.01
  20  10  -8   70.40    6.62
  19  11  -7   28.73    4.41
  18  12  -6  113.34    5.94
  17  13  -5  105.28    5.45
  13  17   5    1.78    2.65
  16  14  -4   14.45    2.94
  14  16   4   12.19    2.53
  15  15  -3  236.56    6.61
  15  15   3  139.08    4.72
  14  16  -2   12.91    2.85
  16  14   2   16.81    2.51
  13  17  -1    5.93    2.28
  17  13   1    9.44    2.26
  12  18   0  100.11    4.74
  18  12   0   78.57    4.13
  11  19   1   11.57    2.63
  19  11  -1    4.34    2.09
  10  20   2    2.43    2.36
  20  10  -2   73.98    4.49
   9  21   3  146.54    5.44
  21   9  -3    1.06    2.49
   8  22   4   67.08    4.55
  22   8  -4   47.68    4.30
  -8 -22  -4   68.30    4.55
   7  23   5  255.33    7.08
  23   7  -5   14.01    3.45
  -7 -23  -5  263.83    7.21
   6  24   6   32.84    3.76
  24   6  -6    4.70    3.01
  -6 -24  -6   27.44    3.69
   5  25   7    1.62    3.03
  25   5  -7    9.22    3.53
  -5 -25  -7   -2.48    5.06
  26   4  -8   68.80    6.20
  21  11  -8    9.59    3.81
  20  12  -7  201.22    8.32
  19  13  -6   35.92    4.27
  18  14  -5    2.77    2.77
  17  15  -4   44.05    4.83
  15  17   4    7.38    2.57
  16  16  -3    0.81    2.69
  16  16   3   42.71    3.70
  15  17  -2   22.19    3.32
  17  15   2    0.86    2.16
  14  18  -1   47.88    4.33
  18  14   1   87.39    4.47
  13  19   0   98.42    5.03
  19  13   0   44.74    3.93
  12  20   1  105.67    4.72
  20  12  -1  729.28   10.32
  11  21   2  105.49    5.07
  21  11  -2   53.85    4.44
  10  22   3   14.10    2.90
  22  10  -3   21.06    3.15
   9  23   4  125.47    5.60
  23   9  -4   39.15    4.35
  -9 -23  -4  130.25    5.63
   8  24   5    1.86    2.68
  24   8  -5   40.04    4.69
  -8 -24  -5    1.03    2.64
   7  25   6  101.65    5.78
  25   7  -6   34.75    4.37
  -7 -25  -6   99.13    5.80
  26   6  -7   23.11    4.31
  27   5  -8    8.79    4.29
  22  12  -8   45.30    5.30
  21  13  -7   25.31    4.68
  20  14  -6    5.53    3.69
  19  15  -5   24.84    3.86
  18  16  -4    5.28    2.84
  16  18   4  117.47    6.35
  17  17  -3    0.41    2.52
  17  17   3   81.77    4.54
  16  18  -2   16.51    3.06
  18  16   2    7.67    2.58
  15  19  -1   12.12    3.11
  19  15   1   49.59    4.18
  14  20   0  128.28    5.70
  20  14   0   31.14    3.41
  13  21   1   10.92    2.72
  21  13  -1   69.82    4.73
  12  22   2   26.59    3.49
  22  12  -2   43.96    4.50
  11  23   3    0.62    2.69
  23  11  -3   26.66    3.52
  10  24   4    4.12    2.84
  24  10  -4    0.48    3.10
   9  25   5   18.11    3.48
  25   9  -5   60.39    5.81
  -9 -25  -5   18.94    3.42
   8  26   6   51.56    5.22
  26   8  -6    1.55    3.59
  27   7  -7    2.14    3.97
  22  14  -7   -0.01    3.44
  21  15  -6   38.21    4.74
  20  16  -5    2.08    3.11
  19  17  -4    3.81    3.02
  18  18  -3    1.61    2.76
  18  18   3   35.30    4.38
  17  19  -2   66.35    5.32
  19  17   2   33.85    4.00
  16  20  -1   -0.03    2.84
  20  16   1    1.01    2.43
  15  21   0  163.66    6.42
  21  15   0  117.84    5.51
  14  22   1   57.67    4.88
  22  14  -1    0.37    2.37
  13  23   2    1.99    2.47
  23  13  -2  166.91    6.17
  12  24   3   71.14    5.16
  24  12  -3   -1.33    2.61
  11  25   4    3.09    3.03
  25  11  -4  114.58    6.10
  10  26   5   62.13    5.26
  26  10  -5   49.38    5.86
  27   9  -6    1.70    3.39
  28   8  -7   30.07    5.23
  23  15  -7   37.03    5.48
  22  16  -6    5.98    3.68
  21  17  -5   36.79    4.63
  20  18  -4    9.45    3.78
  19  19  -3    4.44    3.08
  19  19   3   48.93    6.23
  18  20  -2    2.55    2.90
  20  18   2   -1.45    2.68
  17  21  -1  267.18    8.02
  21  17   1  135.37    5.86
  16  22   0   49.83    5.15
  22  16   0    3.07    2.78
  15  23   1   17.89    3.26
  23  15  -1    7.87    3.10
  14  24   2    1.55    3.01
  24  14  -2   38.95    4.43
  13  25   3   45.55    4.99
  25  13  -3   58.19    5.08
  12  26   4   -2.11    2.89
  26  12  -4    8.92    3.41
  11  27   5   27.35    4.30
  27  11  -5   29.73    4.71
  28  10  -6   57.85    6.78
  23  17  -6   48.99    6.07
  22  18  -5   17.03    4.52
  21  19  -4    1.60    3.63
  20  20  -3   23.87    3.95
  19  21  -2    0.37    3.36
  21  19   2    2.58    2.91
  18  22  -1   17.13    3.54
  22  18   1    4.76    3.07
  17  23   0    1.76    2.88
  23  17   0   -0.25    2.84
  16  24   1   23.00    3.97
  24  16  -1   70.71    5.56
  15  25   2   -0.72    3.13
  25  15  -2   46.15    5.34
  14  26   3    1.15    3.21
  26  14  -3    2.47    3.51
  13  27   4   46.84    5.33
  27  13  -4    1.07    3.27
  28  12  -5    6.38    4.08
  29  11  -6   20.82    4.53
  23  19  -5   12.53    4.13
  22  20  -4   71.29    6.11
  21  21  -3    4.50    3.84
  20  22  -2   40.23    4.90
  19  23  -1    2.77    3.18
  23  19   1   16.16    3.60
  18  24   0  159.44    6.82
  24  18   0   29.82    4.10
  17  25   1   17.65    3.60
  25  17  -1    1.63    3.18
  16  26   2   67.76    5.90
  26  16  -2    6.23    3.51
  15  27   3    1.96    3.38
  27  15  -3    3.18    3.74
  14  28   4    2.79    4.28
  28  14  -4   43.54    5.36
  29  13  -5   59.68    6.92
  24  20  -5    1.13    4.32
  23  21  -4    0.61    3.95
  22  22  -3   37.87    5.19
  21  23  -2    6.72    3.59
  20  24  -1   25.54    4.62
  24  20   1    5.16    3.39
  19  25   0   14.57    4.10
  25  19   0   10.96    3.84
  18  26   1   32.91    4.64
  26  18  -1   13.60    3.93
  17  27   2    5.93    3.66
  27  17  -2    0.83    3.23
  16  28   3    5.88    3.82
  28  16  -3    2.12    3.74
  29  15  -4   14.40    4.14
  23  23  -3   18.80    4.71
  22  24  -2    3.84    3.70
  21  25  -1   91.99    7.15
  20  26   0   14.53    4.38
  26  20   0   -2.73    3.50
  19  27   1    5.83    4.06
  27  19  -1    6.40    3.95
  18  28   2    4.00    3.74
  28  18  -2    1.33    3.90
  29  17  -3   36.96    5.16
  23  25  -2   33.55    5.03
  22  26  -1    7.85    3.94
  21  27   0   23.98    4.93
  20  28   1    0.24    3.91
  28  20  -1   -0.52    3.92
   7  -6 -11   14.71    3.62
   6  -7 -11   13.46    3.78
   6  -7 -11   14.26    4.06
   6  -5 -10    1.19    2.78
   6  -5 -10   -0.81    2.99
   5  -6 -10    9.36    3.03
   5  -6 -10   12.08    3.53
   5  -4  -9   71.80    4.62
   5  -4  -9   84.24    5.28
   4  -5  -9   90.36    4.52
   4  -5  -9   98.08    5.49
  -4   5   9  109.96    6.10
  -5   4   9   91.47    5.37
   4  -3  -8   47.77    3.71
   4  -3  -8   60.37    4.67
   3  -4  -8   26.46    2.89
   3  -4  -8   24.77    3.18
  -3   4   8   23.28    3.08
  -4   3   8   65.60    4.40
   3  -2  -7  105.27    4.08
   3  -2  -7  130.18    5.12
   2  -3  -7  142.85    4.46
   2  -3  -7  163.90    5.27
  -2   3   7  168.61    5.37
  -3   2   7  130.74    4.88
   2  -1  -6  252.13    5.10
   2  -1  -6  288.83    6.01
   1  -2  -6   50.55    2.78
   1  -2  -6   56.03    3.26
  -1   2   6   56.50    3.35
  -2   1   6  314.11    6.36
   1   0  -5    8.75    1.39
   1   0  -5    8.57    1.63
   0  -1  -5    9.88    1.38
   0  -1  -5    9.43    1.77
   0   1   5   10.46    1.71
  -1   0   5    9.98    1.66
   0   1  -4   18.03    1.47
   0   1  -4   24.28    1.83
  -1   0  -4   20.02    1.45
  -1   0  -4   22.68    1.79
   1   0   4   26.10    1.96
   0  -1   4   24.77    2.09
  -1   2  -3 1110.92    6.59
  -1   2  -3 1209.82    8.00
  -2   1  -3 1350.49    6.87
  -2   1  -3 1532.40    8.89
   2  -1   3 1647.22    9.33
   1  -2   3 1317.58    8.27
  -2   3  -2  577.49    3.77
  -2   3  -2  598.65    4.71
  -2   3  -2  663.86    4.79
  -3   2  -2  141.46    1.71
  -3   2  -2  145.41    2.33
  -3   2  -2  157.96    2.47
   3  -2   2  156.97    2.49
   2  -3   2  674.73    4.89
  -3   4  -1  131.48    1.42
  -3   4  -1  121.65    1.76
  -3   4  -1  139.45    1.78
  -4   3  -1  114.90    1.14
  -4   3  -1  108.17    1.58
  -4   3  -1  118.59    1.74
   4  -3   1  117.38    1.75
   3  -4   1  138.00    1.78
  -4   5   0   18.53    0.69
  -5   4   0   75.05    1.22
   5  -4   0  169.11    1.62
   4  -5   0   42.95    0.95
  -6   5   1  281.95    2.93
   6  -5  -1  317.87    3.15
   6  -5  -1  283.94    2.94
   5  -6  -1   71.84    1.59
   5  -6  -1   61.50    1.48
  -7   6   2   67.97    2.01
   7  -6  -2   65.76    1.93
   7  -6  -2   70.28    2.05
   6  -7  -2  107.65    2.38
  -7   8   3   21.15    1.80
  -8   7   3   62.72    2.31
   8  -7  -3   55.93    2.17
   8  -7  -3   62.96    2.32
   7  -8  -3   21.22    1.73
   7  -8  -3   20.18    1.81
  -8   9   4  227.95    4.61
  -9   8   4   61.77    2.89
   9  -8  -4   54.72    2.69
   9  -8  -4   61.40    2.89
   8  -9  -4  219.62    4.52
   8  -9  -4  229.32    4.63
  -9  10   5   54.56    3.08
 -10   9   5   40.42    2.86
  10  -9  -5   36.27    2.65
  10  -9  -5   35.57    2.78
   9 -10  -5   52.06    3.10
   9 -10  -5   56.57    3.13
 -10  11   6   65.37    3.73
 -10  11   6   59.85    3.85
 -11  10   6  209.49    5.65
 -11  10   6  217.35    5.65
  11 -10  -6  197.58    5.49
  11 -10  -6  222.43    5.79
  10 -11  -6   53.45    3.59
  10 -11  -6   61.90    3.99
 -11  12   7   47.99    3.99
 -11  12   7   53.60    4.25
 -12  11   7    4.30    2.59
 -12  11   7    4.12    2.35
  12 -11  -7    4.68    2.40
  12 -11  -7    5.45    2.41
  11 -12  -7   51.69    4.07
  11 -12  -7   51.16    4.08
 -12  13   8  109.57    5.55
 -12  13   8  112.99    5.36
 -13  12   8   51.82    4.56
 -13  12   8   58.13    4.40
  13 -12  -8   49.53    4.60
  13 -12  -8   55.52    4.61
  12 -13  -8  109.39    5.17
  12 -13  -8  115.41    5.59
 -13  14   9   67.44    5.50
 -14  13   9  120.86    6.36
  14 -13  -9  105.32    5.69
  14 -13  -9  126.10    6.85
  13 -14  -9   59.82    5.36
  13 -14  -9   68.48    5.46
 -14  15  10   25.95    4.41
 -15  14  10  284.27    9.73
  15 -14 -10  254.12    8.74
  15 -14 -10  278.50    9.59
  14 -15 -10   26.07    4.05
  14 -15 -10   37.45    5.07
   8  -5 -11   -0.36    3.16
   8  -5 -11    0.11    3.85
   5  -8 -11    9.86    3.88
   7  -4 -10  144.43    6.37
   7  -4 -10  174.52    7.73
   4  -7 -10   42.23    4.60
   4  -7 -10   47.01    5.13
   6  -3  -9   46.40    4.26
   6  -3  -9   53.49    5.29
   3  -6  -9    0.15    2.28
   3  -6  -9    0.62    2.96
  -3   6   9   -0.60    2.74
  -6   3   9   63.17    5.36
   5  -2  -8    5.02    2.13
   5  -2  -8    6.52    2.75
   2  -5  -8   34.49    3.40
   2  -5  -8   38.08    4.32
  -2   5   8   47.58    4.11
  -5   2   8    7.39    2.79
   4  -1  -7    0.47    1.52
   4  -1  -7    1.12    1.95
   1  -4  -7   22.01    2.70
   1  -4  -7   23.53    2.79
  -1   4   7   24.65    3.07
  -4   1   7    1.60    1.92
   3   0  -6   -0.09    1.18
   3   0  -6   -0.12    1.58
   0  -3  -6    0.40    1.28
   0  -3  -6    0.05    1.74
   0   3   6   -0.35    1.58
  -3   0   6    1.76    1.79
   2   1  -5   95.59    3.09
   2   1  -5  112.45    3.76
  -1  -2  -5  129.30    3.23
  -1  -2  -5  135.97    3.97
   1   2   5  148.97    4.10
  -2  -1   5  117.89    3.80
   1   2  -4  441.86    5.23
   1   2  -4  488.53    6.03
  -2  -1  -4   96.34    2.39
  -2  -1  -4  106.58    2.98
   2   1   4  110.75    3.14
  -1  -2   4  531.09    6.14
   0   3  -3    1.25    0.70
   0   3  -3    1.37    0.83
  -3   0  -3    1.69    0.56
  -3   0  -3    2.89    0.88
   3   0   3    2.26    0.90
   0  -3   3    2.21    0.91
  -1   4  -2   61.86    1.51
  -1   4  -2   64.72    1.77
  -1   4  -2   73.19    1.71
  -4   1  -2  355.52    2.42
  -4   1  -2  376.53    3.59
  -4   1  -2  390.95    3.89
   4  -1   2  397.43    3.96
   1  -4   2   70.48    1.71
  -2   5  -1  678.10    3.86
  -2   5  -1  597.00    3.98
  -2   5  -1  760.19    3.83
  -5   2  -1   28.24    0.84
  -5   2  -1   27.72    1.00
   2  -5   1  711.43    3.73
  -3   6   0   18.79    0.74
  -6   3   0   18.41    0.60
   6  -3   0   51.66    0.95
   3  -6   0   54.49    1.22
  -4   7   1  649.38    4.66
  -7   4   1  901.36    5.06
   7  -4  -1  961.97    5.51
   7  -4  -1  917.90    5.10
   4  -7  -1  844.77    5.34
   4  -7  -1  647.94    4.66
  -5   8   2   16.92    1.36
  -8   5   2    2.07    0.69
   8  -5  -2    1.15    0.68
   8  -5  -2    1.61    0.70
   5  -8  -2   15.30    1.33
   5  -8  -2   16.60    1.39
  -6   9   3  194.10    3.81
  -9   6   3   44.87    2.03
   9  -6  -3   41.69    1.98
   9  -6  -3   45.43    2.05
   6  -9  -3  189.82    3.70
   6  -9  -3  196.02    3.84
  -7  10   4  881.03    8.71
  10  -7  -4   42.61    2.38
  10  -7  -4   45.85    2.66
   7 -10  -4  868.69    8.43
   7 -10  -4  906.02    8.82
  -8  11   5   35.36    2.75
  -8  11   5   39.44    3.02
  11  -8  -5   85.34    3.67
  11  -8  -5  101.24    3.80
   8 -11  -5   34.22    2.56
   8 -11  -5   38.73    2.82
  -9  12   6  348.75    7.02
  -9  12   6  374.43    7.33
 -12   9   6  193.70    5.40
  12  -9  -6  185.43    5.24
  12  -9  -6  199.61    5.76
   9 -12  -6  334.15    6.60
   9 -12  -6  360.21    7.13
 -10  13   7   44.78    4.30
 -10  13   7   45.14    3.76
 -13  10   7   -1.57    2.35
 -13  10   7   -0.90    2.17
  13 -10  -7   -0.91    1.93
  13 -10  -7   -0.12    2.17
  10 -13  -7   40.99    3.89
  10 -13  -7   46.55    4.37
 -11  14   8   72.06    5.40
 -11  14   8   72.91    4.75
 -14  11   8    9.58    3.23
 -14  11   8    7.10    2.76
  14 -11  -8    8.75    2.66
  14 -11  -8    7.49    3.16
  11 -14  -8   64.52    4.87
  11 -14  -8   76.85    5.45
 -12  15   9   65.92    5.45
 -15  12   9  112.43    6.72
  15 -12  -9   99.34    6.07
  15 -12  -9  117.39    6.74
  12 -15  -9   61.97    5.43
  12 -15  -9   59.61    5.28
 -13  16  10    3.62    3.49
 -16  13  10   21.15    4.26
  16 -13 -10   16.96    3.73
  16 -13 -10   26.30    4.70
  13 -16 -10    2.93    3.45
  13 -16 -10    3.49    3.50
   9  -4 -11   43.31    4.85
   9  -4 -11   48.56    5.71
   4  -9 -11    1.29    3.50
   8  -3 -10   22.30    3.41
   8  -3 -10   23.64    3.94
   3  -8 -10  185.56    6.67
   3  -8 -10  205.31    8.17
   7  -2  -9    1.83    2.50
   7  -2  -9    3.85    3.14
   2  -7  -9    6.50    2.57
   2  -7  -9    7.80    2.93
  -2   7   9    7.61    3.08
  -7   2   9    3.45    2.89
   6  -1  -8  158.44    5.48
   6  -1  -8  170.26    6.03
   1  -6  -8   35.02    3.39
   1  -6  -8   34.96    3.76
  -1   6   8   42.02    4.13
  -6   1   8  192.70    6.19
   5   0  -7   14.45    2.34
   5   0  -7   16.64    2.62
   0  -5  -7   18.05    2.27
   0  -5  -7   19.22    2.80
   0   5   7   18.07    2.65
  -5   0   7   16.78    2.73
   4   1  -6  152.66    4.34
   4   1  -6  177.67    4.93
  -1  -4  -6   12.95    1.73
  -1  -4  -6   11.53    2.00
   1   4   6   12.12    2.10
  -4  -1   6  185.31    5.09
   3   2  -5  597.01    7.10
   3   2  -5  681.40    8.06
  -2  -3  -5  103.47    2.93
  -2  -3  -5  110.01    3.51
   2   3   5  119.45    3.98
  -3  -2   5  729.73    8.10
   2   3  -4  138.31    3.17
   2   3  -4  154.12    3.60
  -3  -2  -4  464.31    4.81
  -3  -2  -4  484.32    5.92
   3   2   4  516.99    6.29
  -2  -3   4  163.79    3.67
   1   4  -3    4.66    0.92
   1   4  -3    4.19    0.94
   1   4  -3    2.85    1.01
  -4  -1  -3   34.20    1.27
  -4  -1  -3   35.39    1.61
   4   1   3   38.35    1.84
  -1  -4   3    3.01    0.86
   0   5  -2  115.43    2.17
   0   5  -2  128.57    2.38
   0   5  -2  143.92    2.25
  -5   0  -2  132.54    1.51
  -5   0  -2  132.40    2.16
  -5   0  -2  137.92    2.45
   5   0   2  140.48    2.51
   0  -5   2  140.77    2.25
  -1   6  -1  288.61    2.96
  -1   6  -1  239.92    2.69
  -1   6  -1  343.29    2.45
  -6   1  -1   72.32    1.19
  -6   1  -1   60.25    1.40
   6  -1   1   59.61    1.41
   1  -6   1  301.22    2.31
  -2   7   0   60.97    1.43
  -2   7   0   24.43    0.91
  -7   2   0   91.14    1.15
   7  -2   0  260.59    2.24
   2  -7   0   64.09    1.47
  -3   8   1  286.13    3.23
  -8   3   1    7.72    0.73
   8  -3  -1    7.63    0.88
   8  -3  -1    8.02    0.75
   3  -8  -1  400.09    3.91
   3  -8  -1  291.67    3.28
  -4   9   2    1.05    0.73
  -9   4   2  136.71    2.61
   9  -4  -2  131.43    2.77
   9  -4  -2  138.57    2.64
   4  -9  -2    1.63    0.78
   4  -9  -2    1.20    0.75
  -5  10   3  569.72    6.29
  10  -5  -3  540.38    6.13
  10  -5  -3  599.94    6.23
   5 -10  -3  579.33    6.25
   5 -10  -3  570.65    6.25
  -6  11   4  516.30    6.78
  11  -6  -4   33.56    2.45
  11  -6  -4   36.43    2.52
   6 -11  -4  515.66    6.67
   6 -11  -4  524.53    6.90
  -7  12   5  126.09    4.13
  -7  12   5  128.65    4.12
  12  -7  -5  462.18    7.27
  12  -7  -5  521.83    7.52
   7 -12  -5  120.75    4.05
   7 -12  -5  120.73    4.08
  -8  13   6   64.51    3.77
  -8  13   6   71.19    4.08
  13  -8  -6  172.78    5.17
  13  -8  -6  193.09    5.68
   8 -13  -6   62.29    3.51
   8 -13  -6   68.73    3.84
  -9  14   7   43.98    3.89
  -9  14   7   47.66    4.20
 -14   9   7   83.77    4.57
 -14   9   7   84.47    4.74
  14  -9  -7   79.42    4.63
  14  -9  -7   85.51    4.60
   9 -14  -7   43.04    3.57
   9 -14  -7   48.32    3.98
 -10  15   8  177.68    6.55
 -10  15   8  191.03    6.82
 -15  10   8    3.67    2.71
 -15  10   8    3.70    2.36
  15 -10  -8    3.16    2.46
  15 -10  -8    2.04    2.62
  10 -15  -8  173.03    6.04
  10 -15  -8  182.22    6.59
 -11  16   9    0.76    2.94
 -16  11   9    7.45    3.62
  16 -11  -9    1.44    3.11
  16 -11  -9    4.64    3.56
  11 -16  -9    0.77    2.93
  11 -16  -9    4.32    3.07
 -12  17  10    3.75    3.52
 -17  12  10    3.45    3.51
  17 -12 -10   -0.58    3.01
  17 -12 -10    0.61    3.38
  12 -17 -10    2.38    3.03
  12 -17 -10    1.37    3.39
  10  -3 -11   47.35    5.55
  10  -3 -11   59.36    6.83
   3 -10 -11    1.83    3.49
   9  -2 -10    1.49    2.80
   9  -2 -10    3.07    3.19
   2  -9 -10   27.19    4.10
   8  -1  -9    4.47    2.36
   8  -1  -9    1.29    3.10
   1  -8  -9    1.11    2.41
   1  -8  -9    4.72    3.09
  -1   8   9    1.09    3.00
  -8   1   9    3.95    2.97
   7   0  -8   50.81    4.01
   7   0  -8   59.71    4.38
   0  -7  -8   58.98    4.01
   0  -7  -8   61.06    4.81
   0   7   8   66.97    5.08
  -7   0   8   64.95    4.37
   6   1  -7    1.12    1.82
   6   1  -7    2.28    2.30
  -1  -6  -7   15.31    2.18
  -1  -6  -7   18.35    2.58
   1   6   7   18.78    2.87
  -6  -1   7    3.49    2.20
   5   2  -6  124.50    4.00
   5   2  -6  143.25    4.58
  -2  -5  -6   64.30    2.89
  -2  -5  -6   69.56    3.41
   2   5   6   71.18    3.68
  -5  -2   6  153.47    4.72
   4   3  -5  360.73    5.74
   4   3  -5  401.13    6.43
  -3  -4  -5  301.75    4.59
  -3  -4  -5  305.53    5.41
   3   4   5  347.67    6.09
  -4  -3   5  443.01    6.45
   3   4  -4  777.86    7.47
   3   4  -4  859.22    8.06
  -4  -3  -4   16.70    1.42
  -4  -3  -4   18.22    1.82
   4   3   4   18.10    2.11
  -3  -4   4  922.52    7.94
   2   5  -3   52.24    2.04
   2   5  -3   58.90    2.11
   2   5  -3   67.32    2.15
  -5  -2  -3  410.82    3.68
  -5  -2  -3  401.07    4.54
   5   2   3  426.02    5.11
  -2  -5   3   61.15    2.04
   1   6  -2  103.46    2.33
   1   6  -2  114.17    2.38
   1   6  -2  129.76    2.11
  -6  -1  -2   71.44    1.28
  -6  -1  -2   74.31    1.66
  -6  -1  -2   75.43    1.99
   6   1   2   75.68    2.05
  -1  -6   2  129.36    2.12
   0   7  -1  105.62    2.13
   0   7  -1   87.56    1.80
   0   7  -1  134.31    1.47
  -7   0  -1  124.13    1.44
  -7   0  -1   99.18    1.86
   7   0   1  110.60    1.32
   0  -7   1  113.69    1.37
  -1   8   0   86.16    1.88
  -1   8   0   33.60    1.14
  -8   1   0   30.97    0.65
   8  -1   0   86.99    1.54
   1  -8   0   89.87    1.94
  -2   9   1   73.34    1.76
  -9   2   1 1140.53    5.43
   9  -2  -1 1169.16    6.68
   9  -2  -1 1168.67    5.50
   2  -9  -1  109.91    2.31
   2  -9  -1   76.96    1.86
  -3  10   2  479.54    5.02
  10  -3  -2 1024.25    7.46
  10  -3  -2 1098.58    6.91
   3 -10  -2  527.24    5.40
   3 -10  -2  480.85    5.03
  -4  11   3  767.10    7.28
  11  -4  -3   11.82    1.42
  11  -4  -3   14.19    1.65
   4 -11  -3  813.87    7.44
   4 -11  -3  784.69    7.35
  -5  12   4  684.59    7.80
  -5  12   4  762.19    8.13
  12  -5  -4 1095.38    9.98
  12  -5  -4 1221.44   10.03
   5 -12  -4  707.73    7.75
   5 -12  -4  701.81    7.89
  -6  13   5   95.16    3.94
  -6  13   5  103.76    3.82
  13  -6  -5   14.39    2.06
  13  -6  -5   19.69    2.43
   6 -13  -5   93.36    3.74
   6 -13  -5   94.66    3.97
  -7  14   6  328.55    7.06
  -7  14   6  339.42    6.90
  14  -7  -6   77.12    4.21
  14  -7  -6   88.05    4.12
   7 -14  -6  326.19    6.58
   7 -14  -6  325.79    7.05
  -8  15   7   41.36    3.88
  -8  15   7   43.34    4.15
 -15   8   7    2.22    2.26
  15  -8  -7    0.42    2.28
  15  -8  -7    1.62    2.51
   8 -15  -7   41.54    3.58
   8 -15  -7   42.11    3.94
  -9  16   8   13.67    3.39
  -9  16   8   17.66    3.05
 -16   9   8   57.21    5.21
 -16   9   8   54.14    4.77
  16  -9  -8   50.52    4.36
  16  -9  -8   56.62    5.20
   9 -16  -8   16.70    2.97
   9 -16  -8   22.02    3.66
 -10  17   9   -1.08    3.29
 -17  10   9   16.00    3.64
  17 -10  -9   13.85    3.63
  17 -10  -9   15.56    3.62
  10 -17  -9    0.65    2.62
  10 -17  -9    0.00    3.30
 -11  18  10    6.95    3.70
 -18  11  10    0.20    3.40
  18 -11 -10    2.36    3.58
  18 -11 -10    0.67    3.38
  11 -18 -10    9.40    3.74
  11 -18 -10   11.53    3.84
  11  -2 -11   -2.52    2.77
  11  -2 -11    1.16    4.00
   2 -11 -11  107.60    7.51
  -2  11  11   98.09    7.41
  10  -1 -10   -1.50    2.48
  10  -1 -10   -1.18    3.04
   1 -10 -10   29.12    4.44
   9   0  -9   22.41    3.44
   9   0  -9   27.51    3.79
   0  -9  -9   25.73    3.16
   0  -9  -9   27.70    3.94
   0   9   9   23.74    3.81
  -9   0   9   28.64    3.94
   8   1  -8  300.51    7.30
   8   1  -8  354.30    8.13
  -1  -8  -8   54.30    3.71
  -1  -8  -8   52.38    4.58
   1   8   8   57.40    4.96
  -8  -1   8  382.71    8.35
   7   2  -7  123.58    4.72
   7   2  -7  143.12    5.14
  -2  -7  -7    3.18    1.75
  -2  -7  -7    4.53    2.25
   2   7   7    6.00    2.44
  -7  -2   7  152.17    5.29
   6   3  -6  322.63    6.18
   6   3  -6  380.14    6.92
  -3  -6  -6   14.97    1.87
  -3  -6  -6   17.08    2.36
   3   6   6   19.81    2.63
  -6  -3   6  381.16    6.65
   5   4  -5   22.37    2.35
   5   4  -5   25.16    2.64
  -4  -5  -5   30.21    2.10
  -4  -5  -5   29.30    2.53
   4   5   5   32.95    2.91
  -5  -4   5   21.23    2.39
   4   5  -4  130.25    3.41
   4   5  -4  146.39    3.61
  -5  -4  -4  166.91    3.06
  -5  -4  -4  168.80    3.68
   5   4   4  186.98    4.17
  -4  -5   4  157.16    3.54
   3   6  -3  179.81    3.57
   3   6  -3  204.47    3.69
  -6  -3  -3   47.19    1.53
  -6  -3  -3   47.11    1.83
   6   3   3   52.20    2.13
  -3  -6   3  218.44    3.36
   2   7  -2   46.07    1.91
   2   7  -2   50.17    1.71
   2   7  -2   62.01    1.51
  -7  -2  -2    3.71    0.61
  -7  -2  -2    5.86    0.70
  -7  -2  -2    3.79    0.78
   7   2   2    3.78    0.60
   7   2   2    4.33    0.88
  -2  -7   2   57.10    1.48
   1   8  -1 1437.64    8.00
   1   8  -1 1247.58    6.53
   1   8  -1 2009.88    9.15
  -8  -1  -1  567.03    2.77
  -8  -1  -1  459.02    3.97
   8   1   1  502.96    3.34
  -1  -8   1 1532.66    7.77
   0   9   0  213.60    3.14
   0   9   0   86.21    1.84
  -9   0   0   77.32    0.87
   9   0   0  222.01    2.67
   0  -9   0  208.76    3.10
  -1  10   1   16.06    1.09
 -10   1   1  722.08    4.25
  10  -1  -1  724.52    5.62
  10  -1  -1  728.91    4.27
   1 -10  -1   27.62    1.51
   1 -10  -1   19.34    1.13
  -2  11   2    9.47    1.16
  11  -2  -2   29.95    1.82
  11  -2  -2   30.12    1.49
   2 -11  -2   11.68    1.40
   2 -11  -2    7.93    1.02
  -3  12   3  206.39    3.97
  -3  12   3  246.94    4.20
  12  -3  -3    5.11    1.23
  12  -3  -3    6.05    1.21
   3 -12  -3  216.52    4.17
   3 -12  -3  203.82    3.95
  -4  13   4   52.46    2.69
  -4  13   4   61.52    2.95
  13  -4  -4  106.24    3.67
  13  -4  -4  118.18    3.47
   4 -13  -4   53.45    2.66
   4 -13  -4   55.02    2.74
  -5  14   5  216.48    5.35
  -5  14   5  236.61    5.48
  14  -5  -5   45.05    3.01
  14  -5  -5   55.80    3.09
   5 -14  -5  215.58    5.18
   5 -14  -5  218.04    5.23
  -6  15   6    6.67    2.11
  -6  15   6    8.90    2.29
  15  -6  -6  385.11    7.47
  15  -6  -6  441.04    7.91
   6 -15  -6    8.79    2.31
   6 -15  -6    7.27    2.12
  -7  16   7  247.50    6.80
  -7  16   7  270.66    7.15
 -16   7   7   34.52    3.56
  16  -7  -7   31.63    3.61
  16  -7  -7   41.10    4.32
   7 -16  -7  248.40    6.67
   7 -16  -7  250.18    6.85
  -8  17   8    0.39    2.55
  -8  17   8    2.13    2.71
 -17   8   8   56.37    5.23
 -17   8   8   57.27    4.86
  17  -8  -8   51.30    4.46
  17  -8  -8   58.52    5.24
   8 -17  -8    0.64    2.29
   8 -17  -8    0.85    2.53
  -9  18   9   14.84    3.61
 -18   9   9    4.73    3.16
  18  -9  -9    3.10    2.93
  18  -9  -9    0.36    3.37
   9 -18  -9   18.78    3.71
   9 -18  -9   15.41    3.58
 -10  19  10   30.42    4.98
 -19  10  10    0.73    3.43
  19 -10 -10    0.99    3.49
  19 -10 -10   -1.02    3.34
  10 -19 -10   36.14    4.75
  10 -19 -10   33.77    5.04
  12  -1 -11   -0.02    3.36
  12  -1 -11   -1.52    3.93
   1 -12 -11   31.38    4.69
  -1  12  11   29.39    4.63
  11   0 -10   81.35    5.80
  11   0 -10   86.88    6.08
   0 -11 -10   86.50    6.48
  10   1  -9   17.23    3.07
  10   1  -9   25.16    3.76
  -1 -10  -9  152.08    6.33
   1  10   9  168.11    7.18
 -10  -1   9   26.42    3.49
   9   2  -8   39.74    3.99
   9   2  -8   40.90    4.15
  -2  -9  -8   -1.38    1.98
  -2  -9  -8   -2.50    2.44
   2   9   8    1.31    2.60
  -9  -2   8   47.16    4.42
   8   3  -7    1.31    1.81
   8   3  -7    0.57    2.01
  -3  -8  -7  178.50    4.80
  -3  -8  -7  177.66    5.44
   3   8   7  195.16    5.89
  -8  -3   7    2.01    2.13
   7   4  -6   26.42    2.97
   7   4  -6   28.70    3.19
  -4  -7  -6    0.63    1.37
  -4  -7  -6    0.61    1.77
   4   7   6    1.02    1.91
  -7  -4   6   33.29    3.03
   6   5  -5   15.28    2.04
   6   5  -5   13.02    1.90
  -5  -6  -5  428.82    5.47
  -5  -6  -5  427.47    6.37
   5   6   5  480.70    7.19
  -6  -5   5   13.71    1.87
   5   6  -4  478.17    6.41
   5   6  -4  529.12    6.52
  -6  -5  -4   35.05    1.83
  -6  -5  -4   32.63    2.08
   6   5   4   37.79    2.56
  -5  -6   4  568.17    6.23
   4   7  -3    6.39    1.18
   4   7  -3    6.99    1.22
  -7  -4  -3 1637.22    7.89
  -7  -4  -3 1547.47    8.64
   7   4   3 1658.66   10.13
  -4  -7   3    9.03    1.06
   3   8  -2   37.44    1.84
   3   8  -2   41.34    1.74
  -8  -3  -2   42.73    1.38
  -8  -3  -2   43.68    1.34
  -8  -3  -2   43.01    1.71
   8   3   2   42.14    1.38
   8   3   2   43.56    1.85
  -3  -8   2   46.54    1.37
   2   9  -1  624.03    5.81
   2   9  -1  520.46    4.45
  -9  -2  -1  293.68    1.87
  -9  -2  -1  244.27    3.06
   9   2   1  268.19    2.90
  -2  -9   1  595.88    2.45
   1  10   0    4.57    0.96
   1  10   0    1.81    0.70
 -10  -1   0   33.84    0.49
  10   1   0   93.49    2.04
  -1 -10   0    4.48    0.93
   0  11   1 1372.15    8.63
   0  11   1  739.31    5.60
 -11   0   1 1363.82    5.72
  11   0  -1 1420.35    8.36
  11   0  -1 1426.29    5.84
   0 -11  -1 1400.12    8.72
   0 -11  -1  809.47    5.86
  -1  12   2  110.69    2.61
  -1  12   2  161.34    2.92
  12  -1  -2  185.88    3.61
  12  -1  -2  204.18    3.07
   1 -12  -2  137.53    3.15
   1 -12  -2  114.58    2.73
  -2  13   3 1407.75   10.00
  -2  13   3 1697.14   10.47
  13  -2  -3  276.66    4.89
  13  -2  -3  306.66    4.52
   2 -13  -3 1599.47   10.92
   2 -13  -3 1436.27   10.13
  -3  14   4   15.19    1.81
  -3  14   4   19.64    2.06
  14  -3  -4   22.06    2.52
  14  -3  -4   24.10    2.30
   3 -14  -4   17.63    2.08
   3 -14  -4   16.55    2.06
  -4  15   5   35.62    2.84
  -4  15   5   37.25    2.82
  15  -4  -5  142.15    4.71
  15  -4  -5  157.34    4.63
   4 -15  -5   36.04    3.01
   4 -15  -5   31.34    2.77
  -5  16   6    0.88    1.91
  -5  16   6    0.24    2.02
  16  -5  -6   27.51    3.05
  16  -5  -6   33.23    3.53
   5 -16  -6    0.09    1.95
   5 -16  -6    0.83    1.90
  -6  17   7   60.54    4.71
  -6  17   7   56.40    4.51
 -17   6   7  279.60    7.16
  17  -6  -7  273.05    7.14
  17  -6  -7  321.92    7.75
   6 -17  -7   63.38    4.44
   6 -17  -7   54.53    4.66
  -7  18   8    0.89    2.59
  -7  18   8   -1.30    2.53
 -18   7   8   41.17    4.51
  18  -7  -8   40.26    4.35
  18  -7  -8   45.73    5.04
   7 -18  -8    2.30    2.43
   7 -18  -8    1.95    2.58
  -8  19   9   -0.93    3.30
 -19   8   9   26.37    4.37
  19  -8  -9   20.10    3.71
  19  -8  -9   28.83    4.41
   8 -19  -9   -1.17    2.85
   8 -19  -9   -2.21    3.15
  -9  20  10   26.08    4.50
 -20   9  10   55.10    5.78
  20  -9 -10   46.38    5.27
  20  -9 -10   49.87    5.65
   9 -20 -10   35.48    4.71
   9 -20 -10   28.54    4.50
  13   0 -11   58.19    6.07
  13   0 -11   73.08    6.50
   0 -13 -11   72.56    6.26
   0  13  11   66.82    6.17
  12   1 -10   29.53    4.25
  12   1 -10   33.35    4.90
  -1 -12 -10   14.66    4.05
   1  12  10   12.01    3.95
  11   2  -9  171.71    6.72
  11   2  -9  209.91    7.68
  -2 -11  -9   98.85    5.99
   2  11   9  118.18    6.08
 -11  -2   9  208.10    7.22
  10   3  -8   44.57    3.87
  10   3  -8   53.13    4.37
  -3 -10  -8   56.43    3.78
  -3 -10  -8   54.68    4.62
   3  10   8   62.14    5.10
 -10  -3   8   59.37    4.57
   9   4  -7    6.29    2.14
   9   4  -7    6.55    2.31
  -4  -9  -7    0.36    1.68
  -4  -9  -7    0.80    2.15
   4   9   7    1.69    2.38
  -9  -4   7    8.39    2.28
   8   5  -6   22.37    2.72
   8   5  -6   25.24    2.77
  -5  -8  -6   23.81    2.37
  -5  -8  -6   24.95    2.97
   5   8   6   30.25    3.43
  -8  -5   6   23.78    2.54
   7   6  -5   87.30    3.70
   7   6  -5  100.39    3.81
  -6  -7  -5   19.83    2.03
  -6  -7  -5   19.16    2.33
   6   7   5   18.87    2.19
  -7  -6   5  101.77    3.46
   6   7  -4   35.40    2.40
   6   7  -4   39.14    2.32
  -7  -6  -4   14.40    1.62
  -7  -6  -4   14.70    1.76
   7   6   4   14.43    1.86
  -6  -7   4   44.68    2.31
   5   8  -3    0.05    1.02
   5   8  -3    0.61    0.98
  -8  -5  -3  101.73    2.36
  -8  -5  -3  100.79    2.47
   8   5   3  106.76    3.00
  -5  -8   3    0.95    0.80
   4   9  -2   82.90    2.65
   4   9  -2   87.56    2.31
  -9  -4  -2  222.32    2.96
  -9  -4  -2  219.46    2.62
   9   4   2  216.09    2.95
   9   4   2  215.71    3.46
  -4  -9   2  100.83    1.81
   3  10  -1  477.78    5.46
   3  10  -1  427.64    4.18
 -10  -3  -1    7.21    0.48
 -10  -3  -1    5.39    0.79
  10   3   1    7.25    0.91
  10   3   1    6.92    0.48
   2  11   0  226.74    3.80
   2  11   0  111.94    2.29
  11   2   0  161.28    2.84
   1  12   1  972.91    7.73
   1  12   1  449.50    4.51
   1  12   1 1159.10    5.56
 -12  -1   1   71.01    1.44
  12   1  -1   67.96    2.28
  12   1  -1   71.95    1.46
  -1 -12  -1 1000.18    7.83
   0  13   2   71.59    2.27
   0  13   2  108.01    2.48
  13   0  -2   96.25    2.98
  13   0  -2   95.66    2.25
   0 -13  -2   93.50    2.93
   0 -13  -2   73.11    2.32
  -1  14   3  400.11    5.55
  -1  14   3  521.87    5.95
  14  -1  -3  122.90    3.58
  14  -1  -3  133.97    3.17
   1 -14  -3  449.12    6.08
   1 -14  -3  408.45    5.61
  -2  15   4  640.79    7.82
  -2  15   4  763.48    8.21
  15  -2  -4   20.63    2.37
  15  -2  -4   26.45    2.34
   2 -15  -4  683.35    8.13
   2 -15  -4  633.33    7.78
  -3  16   5   75.85    3.77
  -3  16   5   80.96    3.56
  16  -3  -5    6.91    2.01
  16  -3  -5   10.10    2.06
   3 -16  -5   76.93    3.72
   3 -16  -5   73.94    3.74
  -4  17   6  101.61    4.45
  -4  17   6  115.67    4.77
  17  -4  -6    3.58    2.28
  17  -4  -6    7.92    2.35
   4 -17  -6  111.84    4.41
   4 -17  -6  105.30    4.49
  -5  18   7   41.55    3.94
  -5  18   7   50.91    4.36
 -18   5   7   38.45    4.03
  18  -5  -7   40.86    4.37
  18  -5  -7   48.45    4.42
   5 -18  -7   41.36    4.08
   5 -18  -7   37.23    3.87
  -6  19   8   11.03    3.38
  -6  19   8    8.13    2.77
 -19   6   8   43.79    4.59
  19  -6  -8   38.95    4.25
  19  -6  -8   46.80    4.55
   6 -19  -8    7.34    2.91
   6 -19  -8   12.87    3.40
  -7  20   9    5.49    3.53
 -20   7   9   30.99    4.17
  20  -7  -9   28.76    4.35
  20  -7  -9   27.47    4.09
   7 -20  -9    4.19    3.21
   7 -20  -9    9.43    3.66
  -8  21  10    7.68    4.11
 -21   8  10    1.57    3.49
  21  -8 -10    2.61    3.83
  21  -8 -10    2.53    3.52
   8 -21 -10    5.61    3.70
   8 -21 -10    5.62    3.97
  14   1 -11   33.25    4.72
  14   1 -11   50.39    5.90
  -1 -14 -11   20.78    4.33
   1  14  11   19.02    4.28
  13   2 -10   27.30    4.26
  13   2 -10   30.93    4.42
  -2 -13 -10    7.36    3.56
   2  13  10    4.99    3.56
  12   3  -9    5.67    3.07
  12   3  -9    7.97    3.15
  -3 -12  -9  120.06    5.86
   3  12   9  106.94    5.67
   3  12   9  144.79    6.76
 -12  -3   9    9.80    3.17
  11   4  -8    0.08    2.48
  11   4  -8    0.46    2.75
  -4 -11  -8   48.06    4.53
   4  11   8   49.35    4.95
 -11  -4   8    0.29    2.34
  10   5  -7   -0.05    1.95
  10   5  -7   -0.97    2.33
  -5 -10  -7   35.31    3.04
  -5 -10  -7   37.08    3.37
   5  10   7   36.68    4.08
 -10  -5   7    3.57    2.05
   9   6  -6    5.72    1.95
   9   6  -6    6.75    2.03
  -6  -9  -6  428.99    6.34
  -6  -9  -6  417.31    7.13
   6   9   6  473.07    8.07
  -9  -6   6    7.96    2.01
   8   7  -5    3.37    1.68
   8   7  -5    5.35    1.65
  -7  -8  -5   61.87    2.78
  -7  -8  -5   61.70    3.00
   7   8   5   70.15    3.55
  -8  -7   5    4.83    1.52
   7   8  -4    1.05    1.33
   7   8  -4    2.20    1.33
  -8  -7  -4  224.70    3.88
  -8  -7  -4  218.66    4.09
   8   7   4  237.51    4.81
  -7  -8   4    1.41    1.05
   6   9  -3  345.52    5.57
   6   9  -3  382.03    5.13
  -9  -6  -3  204.79    3.36
  -9  -6  -3  199.43    3.30
   9   6   3  204.79    3.36
   9   6   3  214.99    4.05
  -6  -9   3  419.16    4.42
   5  10  -2  431.10    5.80
   5  10  -2  463.39    4.97
 -10  -5  -2    1.98    0.62
  10   5   2    3.01    0.90
  10   5   2    2.14    0.96
  -5 -10   2  521.49    3.67
   4  11  -1   47.18    2.22
   4  11  -1   40.93    1.68
 -11  -4  -1   23.20    1.35
  11   4   1   26.27    1.59
   3  12   0  514.33    5.92
   3  12   0  279.32    3.50
  12   3   0  708.18    6.10
   2  13   1    3.90    1.25
   2  13   1    1.14    0.67
   2  13   1    2.59    0.62
 -13  -2   1  111.98    1.72
  13   2  -1  109.56    2.84
  13   2  -1  116.71    1.75
  -2 -13  -1    3.33    1.23
   1  14   2    4.17    0.97
   1  14   2    9.71    1.12
  14   1  -2    0.63    1.21
  14   1  -2    1.20    0.80
  -1 -14  -2    9.90    1.46
  -1 -14  -2    5.21    1.04
   0  15   3   16.08    1.82
   0  15   3   19.53    2.00
  15   0  -3   15.13    1.84
  15   0  -3   18.95    1.76
   0 -15  -3   17.40    1.97
   0 -15  -3   16.58    1.85
  -1  16   4   91.44    3.34
  -1  16   4  110.92    3.71
  16  -1  -4  267.77    5.70
  16  -1  -4  296.08    5.21
   1 -16  -4  103.55    3.84
   1 -16  -4   94.90    3.40
  -2  17   5   51.63    3.47
  -2  17   5   57.09    3.48
  17  -2  -5    4.15    1.96
  17  -2  -5    5.98    1.88
   2 -17  -5   55.61    3.27
   2 -17  -5   48.81    3.44
  -3  18   6   92.61    4.62
  -3  18   6  110.37    4.74
  18  -3  -6    8.41    2.37
  18  -3  -6   10.08    2.39
   3 -18  -6  100.43    4.59
   3 -18  -6   97.72    4.72
  -4  19   7    5.81    2.47
  -4  19   7    5.05    2.51
 -19   4   7    8.45    2.41
  19  -4  -7    7.33    2.61
  19  -4  -7    9.82    2.78
   4 -19  -7    3.65    2.25
   4 -19  -7    3.20    2.32
  -5  20   8  136.81    6.46
  -5  20   8  156.31    6.60
 -20   5   8   70.71    5.01
  20  -5  -8   64.57    5.45
  20  -5  -8   78.40    5.56
   5 -20  -8  137.93    6.14
   5 -20  -8  134.08    6.05
  -6  21   9    7.72    3.69
 -21   6   9   10.88    3.80
  21  -6  -9    5.97    3.27
  21  -6  -9   11.15    3.80
   6 -21  -9    7.21    3.02
   6 -21  -9    7.80    3.55
  -7  22  10   33.25    5.07
 -22   7  10    2.04    3.89
  22  -7 -10    4.00    3.46
  22  -7 -10    1.31    3.85
   7 -22 -10   35.24    4.72
   7 -22 -10   32.38    5.03
  14   3 -10   -1.45    2.76
  14   3 -10    4.09    3.41
  -3 -14 -10    1.17    3.44
   3  14  10    0.42    3.43
  13   4  -9   34.06    3.99
  13   4  -9   39.21    4.44
  -4 -13  -9    0.59    2.91
   4  13   9    1.93    3.00
 -13  -4   9   43.92    4.84
  12   5  -8   18.40    3.14
  12   5  -8   18.55    3.41
  -5 -12  -8   26.98    3.55
   5  12   8   26.76    3.50
   5  12   8   23.52    3.30
 -12  -5   8   19.14    3.08
  11   6  -7   53.87    3.99
  11   6  -7   54.73    4.04
  -6 -11  -7  297.84    6.20
  -6 -11  -7  284.06    6.59
   6  11   7  317.40    7.34
 -11  -6   7   64.87    4.34
  10   7  -6   41.21    3.39
  10   7  -6   49.82    3.74
  -7 -10  -6   90.92    3.63
  -7 -10  -6   82.94    3.82
   7  10   6   97.60    4.54
 -10  -7   6   52.97    3.34
   9   8  -5   26.69    3.13
   9   8  -5   29.13    2.91
  -8  -9  -5 1091.00    9.17
  -8  -9  -5 1011.65    9.55
   8   9   5 1100.47   10.83
  -9  -8   5   32.43    2.64
   8   9  -4  491.17    7.36
   8   9  -4  573.34    7.07
  -9  -8  -4    2.33    1.21
  -9  -8  -4    1.64    1.13
   9   8   4    1.59    1.44
  -8  -9   4  601.24    6.31
   7  10  -3   46.78    2.86
   7  10  -3   55.81    2.43
 -10  -7  -3   33.10    1.95
 -10  -7  -3   29.97    1.66
  10   7   3   32.38    1.92
  10   7   3   32.71    1.70
  10   7   3   33.60    2.35
  -7 -10   3   59.81    2.00
   6  11  -2 1145.90    9.89
   6  11  -2 1221.30    8.08
 -11  -6  -2    1.54    0.63
  11   6   2    1.03    0.96
  11   6   2    1.97    0.62
  11   6   2    2.07    0.99
  -6 -11   2 1363.63    5.68
   5  12  -1    1.10    1.15
   5  12  -1    1.87    0.83
 -12  -5  -1  251.75    3.44
  12   5   1  264.65    3.92
   4  13   0  145.56    3.56
   4  13   0   83.67    2.16
  13   4   0    3.04    1.05
   3  14   1  203.96    4.15
   3  14   1   86.22    2.26
   3  14   1  237.34    2.60
 -14  -3   1    1.06    0.50
  14   3  -1    0.34    1.08
  14   3  -1    0.99    0.51
  -3 -14  -1  199.81    4.11
   2  15   2   87.92    3.07
   2  15   2   57.31    2.15
   2  15   2  104.66    2.50
  15   2  -2   20.26    2.25
  15   2  -2   15.53    1.38
  -2 -15  -2   92.31    3.13
  -2 -15  -2   60.19    2.23
   1  16   3    2.12    1.09
   1  16   3    3.89    1.25
  16   1  -3  146.94    4.17
  16   1  -3  161.52    3.48
  -1 -16  -3    1.75    1.40
  -1 -16  -3    1.81    1.14
   0  17   4  121.34    3.87
   0  17   4  155.46    4.21
  17   0  -4  138.28    4.49
  17   0  -4  148.09    3.94
   0 -17  -4  145.96    4.50
   0 -17  -4  122.64    3.88
  -1  18   5  106.46    4.25
  -1  18   5  125.00    4.40
  18  -1  -5   99.75    4.64
  18  -1  -5  112.51    4.14
   1 -18  -5  116.81    4.31
   1 -18  -5  104.69    4.25
  -2  19   6   21.88    2.90
  -2  19   6   23.59    2.75
  19  -2  -6   37.34    3.70
  19  -2  -6   44.49    3.81
   2 -19  -6   18.56    2.85
   2 -19  -6   19.22    2.84
  -3  20   7    5.17    2.44
  -3  20   7    4.94    2.47
 -20   3   7    1.00    1.96
  20  -3  -7    1.97    2.46
  20  -3  -7    0.67    2.24
   3 -20  -7    4.98    2.65
   3 -20  -7    5.54    2.48
  -4  21   8  200.36    7.33
  -4  21   8  212.27    7.35
 -21   4   8   47.56    4.62
  21  -4  -8   40.00    4.62
  21  -4  -8   47.26    5.10
   4 -21  -8  206.37    7.10
   4 -21  -8  204.52    7.39
  -5  22   9  108.87    6.24
 -22   5   9   82.66    6.44
  22  -5  -9   68.83    6.28
  22  -5  -9   74.09    6.26
   5 -22  -9  115.09    6.47
   5 -22  -9  105.74    6.24
  -6  23  10    4.78    4.10
 -23   6  10    7.98    4.26
  23  -6 -10    8.45    4.22
  23  -6 -10    9.31    4.28
   6 -23 -10    8.29    3.73
   6 -23 -10   12.30    4.34
  15   4 -10   20.09    3.83
  15   4 -10   22.96    4.44
  -4 -15 -10   -0.10    3.22
   4  15  10    4.81    3.22
  14   5  -9   27.26    4.13
  14   5  -9   21.90    3.97
  -5 -14  -9   55.92    4.79
   5  14   9   56.08    4.80
 -14  -5   9   28.85    3.81
  13   6  -8    8.23    3.09
  13   6  -8    7.86    3.09
  -6 -13  -8   43.75    4.45
   6  13   8   45.15    4.48
   6  13   8   48.21    4.99
 -13  -6   8    9.84    2.86
  12   7  -7   30.80    3.69
  12   7  -7   34.58    3.66
  -7 -12  -7    4.73    2.31
   7  12   7    5.57    2.40
   7  12   7    5.66    2.56
 -12  -7   7   35.29    3.64
  11   8  -6  296.45    6.96
  11   8  -6  346.73    7.07
  -8 -11  -6   56.95    3.34
  -8 -11  -6   54.97    3.45
   8  11   6   55.50    3.47
   8  11   6   61.64    4.07
 -11  -8   6  352.53    6.56
  10   9  -5    2.48    2.04
  10   9  -5    2.23    1.80
  -9 -10  -5   26.50    2.43
  -9 -10  -5   26.26    2.48
   9  10   5   24.28    2.47
   9  10   5   27.97    3.06
 -10  -9   5    4.55    1.53
   9  10  -4  534.22    7.97
   9  10  -4  622.05    7.49
 -10  -9  -4   30.47    2.31
 -10  -9  -4   31.98    2.20
  10   9   4   31.14    2.33
  10   9   4   29.92    2.19
  10   9   4   33.83    2.84
  -9 -10   4  641.86    6.49
   8  11  -3  675.07    8.39
   8  11  -3  770.19    7.40
 -11  -8  -3   55.38    2.40
 -11  -8  -3   55.07    1.96
  11   8   3   54.99    2.43
  11   8   3   51.87    1.97
  11   8   3   55.56    2.71
  -8 -11   3  808.38    5.93
   7  12  -2   61.96    3.13
   7  12  -2   65.07    2.35
 -12  -7  -2    1.47    0.60
  12   7   2    2.28    1.11
  12   7   2    2.09    0.59
  12   7   2    1.95    1.03
  -7 -12   2   73.65    1.49
   6  13  -1  120.92    3.59
   6  13  -1  113.22    2.58
 -13  -6  -1  179.29    3.19
  13   6   1  175.41    3.57
   5  14   0   31.47    2.49
   5  14   0   18.18    1.46
  14   5   0  117.20    3.15
   4  15   1   40.79    2.47
   4  15   1   17.48    1.43
   4  15   1   42.02    1.36
 -15  -4   1   27.34    1.05
  15   4  -1   29.42    2.28
  15   4  -1   28.35    1.05
  -4 -15  -1   40.47    2.42
   3  16   2  101.09    3.43
   3  16   2   51.97    2.11
   3  16   2  115.63    2.62
  16   3  -2   19.27    2.39
  16   3  -2   19.83    1.50
  -3 -16  -2  100.50    3.42
  -3 -16  -2   59.42    2.26
   2  17   3    4.03    1.28
   2  17   3    3.06    1.28
  17   2  -3  338.95    6.22
  17   2  -3  370.67    4.98
  -2 -17  -3    3.83    1.71
  -2 -17  -3    3.47    1.32
   1  18   4    6.58    1.60
   1  18   4    9.66    1.79
  18   1  -4   45.54    3.27
  18   1  -4   48.42    2.88
  -1 -18  -4    7.18    1.88
  -1 -18  -4    4.77    1.56
   0  19   5   35.35    3.16
   0  19   5   47.00    3.35
  19   0  -5   35.63    3.79
  19   0  -5   44.10    3.19
   0 -19  -5   39.51    3.60
   0 -19  -5   36.03    3.18
  -1  20   6   89.02    4.62
  -1  20   6  107.52    4.78
  20  -1  -6   -0.85    2.21
  20  -1  -6    1.86    2.23
   1 -20  -6   96.93    4.83
   1 -20  -6   89.34    4.63
  -2  21   7    8.24    2.58
  -2  21   7   10.05    2.85
 -21   2   7  100.67    5.04
  21  -2  -7   95.08    5.74
  21  -2  -7  103.71    4.93
   2 -21  -7   12.39    3.02
   2 -21  -7    5.76    2.47
  -3  22   8    0.65    2.94
  -3  22   8    1.18    2.68
 -22   3   8   15.27    3.02
  22  -3  -8   14.42    3.68
  22  -3  -8   24.00    3.83
   3 -22  -8    3.11    2.98
   3 -22  -8    1.23    2.93
  -4  23   9    5.20    3.60
 -23   4   9   52.90    5.98
  23  -4  -9   49.51    5.36
  23  -4  -9   52.83    5.94
   4 -23  -9    2.67    3.38
   4 -23  -9    5.08    3.54
  -5  24  10    8.03    4.19
 -24   5  10   -1.76    3.71
  24  -5 -10    0.02    3.94
  24  -5 -10    0.79    3.85
   5 -24 -10   14.65    6.41
   5 -24 -10   12.58    4.33
  16   5 -10   -2.96    2.83
  16   5 -10    1.23    3.28
  -5 -16 -10    3.31    3.37
   5  16  10    5.75    3.29
  15   6  -9    3.66    3.29
  15   6  -9    5.06    3.06
  -6 -15  -9    7.06    3.26
   6  15   9    7.27    3.27
  14   7  -8   72.11    5.09
  14   7  -8   83.12    5.48
  -7 -14  -8   29.89    3.54
   7  14   8   26.59    3.45
   7  14   8   32.22    4.02
 -14  -7   8   83.15    4.92
  13   8  -7   -1.52    2.16
  13   8  -7    0.40    2.39
  -8 -13  -7   17.64    2.73
   8  13   7   19.42    2.79
   8  13   7   20.50    3.29
 -13  -8   7   -1.23    1.98
  12   9  -6   39.23    3.74
  12   9  -6   47.72    3.76
  -9 -12  -6   20.74    2.45
  -9 -12  -6   23.42    2.59
   9  12   6   19.80    2.49
   9  12   6   21.13    2.78
 -12  -9   6   49.97    3.48
  11  10  -5   18.02    2.58
  11  10  -5   18.81    2.41
 -10 -11  -5    2.47    1.68
 -10 -11  -5    0.47    1.44
  10  11   5    0.94    1.59
  10  11   5    1.95    1.50
  10  11   5    0.59    1.87
 -11 -10   5   22.86    2.57
  10  11  -4   92.00    4.27
  10  11  -4   98.17    3.54
 -11 -10  -4  847.67    8.13
 -11 -10  -4  768.71    7.30
  11  10   4  840.38    8.08
  11  10   4  787.25    7.39
  11  10   4  881.95    9.06
 -10 -11   4  106.86    3.04
   9  12  -3   59.33    3.27
   9  12  -3   67.60    2.81
 -12  -9  -3    7.53    1.13
  12   9   3    7.85    1.53
  12   9   3    8.40    1.15
  12   9   3    9.15    1.58
  -9 -12   3   71.82    2.11
   8  13  -2    8.04    1.76
   8  13  -2    9.06    1.33
 -13  -8  -2  403.74    3.29
  13   8   2  538.15    6.16
  13   8   2  399.46    3.27
  -8 -13   2   10.34    0.88
   7  14  -1   43.25    2.72
   7  14  -1   39.48    1.94
  14   7   1  303.31    4.79
   6  15   0   14.41    1.87
   6  15   0    9.20    1.18
  15   6   0    5.15    1.43
   5  16   1   49.22    2.78
   5  16   1   20.90    1.63
   5  16   1   49.20    1.42
 -16  -5   1  312.60    2.54
  16   5  -1  314.74    5.48
  16   5  -1  321.89    2.58
   4  17   2  185.02    4.73
   4  17   2   92.50    2.73
   4  17   2  211.99    3.39
  17   4  -2  454.14    6.93
  17   4  -2  493.28    4.61
  -4 -17  -2  192.76    4.81
   3  18   3  380.47    6.50
   3  18   3  265.83    4.87
   3  18   3  435.94    5.65
  18   3  -3  136.06    4.64
  18   3  -3  145.50    3.37
  -3 -18  -3  387.06    6.58
  -3 -18  -3  281.23    5.03
   2  19   4    7.19    1.74
   2  19   4   10.95    1.90
  19   2  -4    1.14    2.06
  19   2  -4    7.25    1.69
  -2 -19  -4    8.12    2.28
  -2 -19  -4    7.34    1.78
   1  20   5   66.27    3.69
   1  20   5   87.59    4.16
  20   1  -5    0.75    2.08
  20   1  -5    0.31    1.76
  -1 -20  -5   82.19    4.38
  -1 -20  -5   66.01    3.70
   0  21   6   16.24    2.77
   0  21   6   20.24    2.91
  21   0  -6   15.56    3.25
  21   0  -6   16.23    2.69
   0 -21  -6   16.61    3.01
   0 -21  -6   14.48    2.72
  -1  22   7    1.92    2.59
  -1  22   7   -0.31    2.36
 -22   1   7    2.16    2.33
  22  -1  -7   -0.58    2.92
  22  -1  -7    4.60    2.71
   1 -22  -7    1.98    2.66
   1 -22  -7   -1.18    2.46
  -2  23   8   -1.80    2.87
  -2  23   8   -0.02    2.87
 -23   2   8    4.36    2.75
  23  -2  -8    4.56    3.40
  23  -2  -8    4.87    3.11
   2 -23  -8    0.94    3.04
   2 -23  -8   -0.26    2.88
  -3  24   9   55.40    5.91
 -24   3   9   13.88    3.61
  24  -3  -9   13.33    4.19
  24  -3  -9   11.78    3.53
   3 -24  -9   60.31    5.82
   3 -24  -9   58.06    5.89
  17   6 -10    8.07    3.95
  17   6 -10    8.64    4.11
  -6 -17 -10    8.18    3.96
   6  17  10    7.83    3.74
  16   7  -9  140.86    6.83
  16   7  -9  173.07    7.49
  -7 -16  -9   14.27    3.36
   7  16   9   11.37    3.35
  15   8  -8    5.24    2.89
  15   8  -8    4.87    2.97
  -8 -15  -8    4.20    2.71
   8  15   8    6.16    2.78
   8  15   8    3.34    3.09
  14   9  -7  136.44    6.21
  14   9  -7  153.60    5.87
  -9 -14  -7   33.65    3.65
   9  14   7   33.26    3.67
   9  14   7   36.21    4.36
  13  10  -6  146.75    5.66
  13  10  -6  161.91    5.39
 -10 -13  -6   45.43    3.29
  10  13   6   50.38    3.41
  10  13   6   53.17    4.34
  12  11  -5   -0.43    1.95
  12  11  -5    0.13    1.81
 -11 -12  -5    4.72    1.86
 -11 -12  -5    3.94    1.65
  11  12   5    5.30    1.88
  11  12   5    3.12    1.63
  11  12   5    3.76    2.06
 -12 -11   5    1.05    1.44
  11  12  -4  262.75    6.30
  11  12  -4  296.36    5.47
 -12 -11  -4  292.73    5.29
 -12 -11  -4  259.78    4.50
  12  11   4  288.43    5.27
  12  11   4  262.72    4.53
  12  11   4  311.79    5.81
 -11 -12   4  302.36    4.58
  10  13  -3  275.46    6.26
  10  13  -3  319.73    5.12
 -13 -10  -3   49.94    1.95
  13  10   3   60.86    2.83
  13  10   3   49.95    1.94
  13  10   3   57.60    2.82
 -10 -13   3  317.00    3.72
   9  14  -2  220.53    5.48
   9  14  -2  237.25    4.05
  14   9   2  308.87    5.07
  14   9   2  178.75    2.18
  -9 -14   2  247.38    2.06
   8  15  -1  135.57    4.42
   8  15  -1  129.17    2.95
  15   8   1  128.73    3.64
   7  16   0  197.77    4.97
   7  16   0  140.96    3.00
 -16  -7   0  460.14    7.10
  16   7   0  594.20    7.25
   6  17   1  378.85    6.40
   6  17   1  193.11    3.55
   6  17   1  372.21    3.04
 -17  -6   1   68.74    1.71
  17   6  -1   61.77    3.00
  17   6  -1   67.27    1.29
   5  18   2   25.75    2.94
   5  18   2   11.08    1.38
   5  18   2   30.80    1.87
  18   5  -2    9.82    2.09
  18   5  -2    9.75    1.13
  -5 -18  -2   27.10    2.92
   4  19   3  288.39    6.18
   4  19   3  174.87    4.04
   4  19   3  311.63    4.90
  19   4  -3   11.36    2.19
  19   4  -3   12.28    1.58
  -4 -19  -3  284.89    6.17
  -4 -19  -3  188.36    4.22
   3  20   4  220.60    5.81
   3  20   4  167.17    4.60
   3  20   4  246.66    5.22
  20   3  -4   75.16    4.42
  20   3  -4   81.01    3.35
  -3 -20  -4  226.78    5.89
  -3 -20  -4  172.57    4.68
   2  21   5    0.37    1.77
   2  21   5    1.65    1.92
  21   2  -5  104.33    4.93
  21   2  -5  106.83    4.28
  -2 -21  -5    1.97    2.34
  -2 -21  -5    0.63    1.80
   1  22   6   74.10    4.36
   1  22   6   84.46    4.83
  22   1  -6  160.98    6.19
  22   1  -6  181.74    5.61
  -1 -22  -6   82.44    4.91
  -1 -22  -6   69.25    4.28
   0  23   7    1.50    2.47
   0  23   7    0.12    2.62
 -23   0   7    0.24    2.24
  23   0  -7   -1.60    2.94
  23   0  -7   -0.30    2.47
   0 -23  -7   -1.44    2.56
   0 -23  -7   -2.53    2.35
  -1  24   8    3.19    3.10
  -1  24   8    3.31    3.17
 -24   1   8   49.94    5.03
  24  -1  -8   47.72    5.22
  24  -1  -8   61.64    5.41
   1 -24  -8    3.05    3.27
   1 -24  -8    5.01    3.09
  -2  25   9   -0.62    2.93
 -25   2   9   14.65    4.06
  25  -2  -9   13.95    3.97
  25  -2  -9   15.62    4.11
   2 -25  -9    2.93    3.86
   2 -25  -9   -0.49    2.89
  18   7 -10    0.52    3.77
  18   7 -10    2.51    3.70
  17   8  -9   58.90    5.59
  17   8  -9   70.48    6.01
  16   9  -8   51.59    5.04
  16   9  -8   58.74    5.17
   9  16   8   67.69    5.43
  15  10  -7    1.68    2.87
  15  10  -7    2.58    2.67
  10  15   7    2.97    3.92
  10  15   7   -0.50    2.67
  14  11  -6    5.24    2.57
  14  11  -6    7.43    2.45
  11  14   6   82.73    4.70
  11  14   6   94.58    4.73
  13  12  -5  143.85    5.76
  13  12  -5  170.52    4.97
 -12 -13  -5  156.16    4.65
  12  13   5  152.80    4.63
  12  13   5  147.33    4.91
  12  13   5  158.98    5.15
  12  13  -4    0.64    2.00
  12  13  -4   -0.17    1.59
  13  12   4  288.42    5.57
  13  12   4  286.76    5.70
  11  14  -3    5.12    2.27
  11  14  -3    4.27    1.51
  14  11   3   24.00    2.72
  14  11   3   24.45    2.48
  10  15  -2    8.30    2.27
  10  15  -2    7.03    1.37
  15  10   2    0.87    1.54
   9  16  -1    1.59    1.92
   9  16  -1    1.40    1.09
  16   9   1  531.04    7.01
   8  17   0   19.19    2.32
   8  17   0   16.53    1.76
  17   8   0  358.36    6.10
   7  18   1   35.31    3.25
   7  18   1   16.37    1.82
  18   7  -1  150.99    4.53
   6  19   2   38.71    3.43
   6  19   2   15.58    1.77
   6  19   2   43.12    2.02
  19   6  -2  100.78    4.24
  -6 -19  -2   40.32    3.37
   5  20   3  309.52    6.62
   5  20   3  174.13    4.15
   5  20   3  344.05    5.13
  20   5  -3  173.12    5.50
  20   5  -3  186.40    4.84
  -5 -20  -3  309.79    6.62
   4  21   4   17.34    2.80
   4  21   4   12.61    1.93
   4  21   4   19.98    2.18
  21   4  -4   98.14    4.65
  21   4  -4  101.16    3.64
  -4 -21  -4   14.81    2.77
  -4 -21  -4   12.27    2.00
   3  22   5   29.89    3.41
   3  22   5   25.46    3.03
   3  22   5   36.50    3.31
  22   3  -5    4.89    2.74
  22   3  -5    4.72    2.04
  -3 -22  -5   35.87    3.59
  -3 -22  -5   24.39    3.04
   2  23   6   18.12    2.81
   2  23   6   23.28    3.06
  23   2  -6   11.75    3.08
  23   2  -6   13.02    2.72
  -2 -23  -6   24.57    3.51
  -2 -23  -6   18.00    2.82
   1  24   7    9.07    2.72
   1  24   7    9.93    3.09
  24   1  -7    4.09    2.99
  24   1  -7    4.96    3.26
  -1 -24  -7   11.13    3.21
  -1 -24  -7    8.18    2.68
   0  25   8    1.91    2.86
   0  25   8    0.71    3.20
  25   0  -8   -0.70    3.52
   0 -25  -8    0.02    3.20
   0 -25  -8    2.75    2.88
  -1  26   9   64.77    6.02
  26  -1  -9   18.82    4.68
   1 -26  -9   73.28    6.10
  18   9  -9   59.51    5.81
  18   9  -9   65.75    5.88
  17  10  -8    3.84    3.08
  17  10  -8    0.65    2.96
  10  17   8   41.91    5.12
  16  11  -7    3.18    3.12
  16  11  -7    8.25    2.92
  11  16   7   69.71    4.99
  15  12  -6   35.86    4.09
  15  12  -6   38.34    3.82
  12  15   6    5.52    2.54
  14  13  -5    4.18    2.72
  14  13  -5    5.76    2.18
  13  14   5   17.35    2.46
  13  14   5   18.71    2.68
  13  14  -4    6.76    2.62
  13  14  -4    5.28    1.85
  14  13   4   22.48    2.53
  14  13   4   22.27    2.45
  12  15  -3   38.82    3.90
  12  15  -3   43.74    2.72
  15  12   3   33.89    2.86
  11  16  -2  326.22    7.07
  11  16  -2  358.89    5.09
  16  11   2   57.61    3.35
  10  17  -1   25.91    3.06
  10  17  -1   27.27    2.06
  17  10   1  132.34    4.23
   9  18   0   91.41    4.30
   9  18   0   72.39    2.53
  18   9   0   18.83    2.38
   8  19   1    4.28    1.98
   8  19   1    1.86    1.20
  19   8  -1  160.38    4.91
   7  20   2   21.06    2.63
   7  20   2   10.99    1.54
  20   7  -2   11.62    2.47
   6  21   3   71.48    3.96
   6  21   3   41.85    2.63
  21   6  -3  277.82    6.65
  -6 -21  -3   83.97    4.10
   5  22   4  176.49    5.82
   5  22   4  109.36    3.82
  22   5  -4   26.85    3.41
  -5 -22  -4  177.68    5.87
  -5 -22  -4  122.65    4.05
   4  23   5    3.93    2.51
   4  23   5    3.44    1.94
  23   4  -5   46.17    4.81
  -4 -23  -5    6.88    2.64
  -4 -23  -5    4.19    1.97
   3  24   6   12.18    2.65
  24   3  -6   24.53    3.70
  -3 -24  -6   13.53    3.24
  -3 -24  -6   12.18    2.68
   2  25   7   39.12    4.32
  25   2  -7   49.13    5.21
  -2 -25  -7   50.01    5.07
  -2 -25  -7   39.21    4.24
   1  26   8   -1.31    2.88
  26   1  -8   18.95    4.43
  -1 -26  -8   -1.33    3.19
  -1 -26  -8   -1.09    3.26
  27   0  -9   19.31    4.74
  19  10  -9   39.36    5.27
  18  11  -8    6.69    3.79
  17  12  -7   38.65    4.53
  16  13  -6   82.83    5.81
  13  16   6   86.00    7.67
  15  14  -5   92.01    5.51
  14  15   5   -0.06    2.38
  14  15  -4    0.82    2.27
  15  14   4    7.33    2.23
  15  14   4    6.14    2.29
  13  16  -3    9.29    2.55
  16  13   3   16.08    2.38
  12  17  -2   27.86    3.21
  17  12   2  150.58    4.72
  11  18  -1  128.30    4.86
  18  11   1    0.00    1.79
  10  19   0  110.84    4.57
  19  10   0   -0.22    1.91
   9  20   1    0.24    2.19
  20   9  -1  199.88    5.62
   8  21   2  357.51    7.42
  21   8  -2  235.34    6.28
   7  22   3    1.43    2.14
  22   7  -3  191.51    5.95
  -7 -22  -3    1.25    2.09
   6  23   4  149.73    5.39
  23   6  -4   27.84    3.40
  -6 -23  -4  148.82    5.39
   5  24   5   70.28    4.90
  24   5  -5  189.13    6.75
  -5 -24  -5   74.13    5.01
   4  25   6  184.45    6.75
  25   4  -6    0.06    2.84
  -4 -25  -6  197.33    6.92
   3  26   7    7.97    3.23
  26   3  -7   38.72    4.62
  -3 -26  -7    5.43    3.23
  27   2  -8    2.47    3.94
  20  11  -9    6.58    3.81
  19  12  -8   -1.82    3.19
  18  13  -7    2.60    3.07
  17  14  -6   41.79    4.63
  16  15  -5    1.70    2.65
  15  16  -4    8.38    2.77
  16  15   4  110.38    4.65
  14  17  -3    1.48    2.61
  17  14   3   13.95    2.48
  13  18  -2   90.86    4.69
  18  13   2   27.62    3.25
  12  19  -1   46.83    3.88
  19  12   1   68.95    3.97
  11  20   0    1.14    2.41
  20  11   0   85.20    4.34
  10  21   1    0.46    2.40
  21  10  -1  481.06    8.20
   9  22   2    5.70    2.63
  22   9  -2    6.99    2.62
   8  23   3   45.18    4.31
  23   8  -3   93.83    4.87
   7  24   4  207.48    6.58
  24   7  -4    7.04    3.09
  -7 -24  -4  212.90    6.67
   6  25   5    4.17    2.92
  25   6  -5   10.67    3.53
  -6 -25  -5   -0.54    2.79
   5  26   6   20.84    3.57
  26   5  -6  183.94    7.74
  -5 -26  -6   24.20    3.67
   4  27   7   19.16    3.90
  27   4  -7    1.28    3.66
  -4 -27  -7   21.22    4.03
  28   3  -8    1.01    3.54
  20  13  -8   57.01    5.98
  19  14  -7   16.52    4.17
  18  15  -6   33.69    4.27
  17  16  -5   18.50    3.52
  16  17  -4  177.64    6.93
  15  18  -3    3.08    2.60
  18  15   3   69.14    4.10
  14  19  -2   64.85    4.93
  19  14   2   85.99    4.56
  13  20  -1    1.67    2.66
  20  13   1   12.92    2.68
  12  21   0  293.69    7.47
  21  12   0   15.90    2.81
  11  22   1    4.42    2.69
  22  11  -1    5.83    2.61
  10  23   2  352.58    8.00
  23  10  -2    9.67    2.86
   9  24   3   -0.36    2.32
  24   9  -3   46.49    4.76
   8  25   4   -0.74    2.65
  25   8  -4   -1.06    2.92
  -8 -25  -4    2.00    2.65
   7  26   5   -2.20    2.89
  26   7  -5  128.44    6.81
  -7 -26  -5    0.30    2.93
   6  27   6   42.26    4.54
  27   6  -6   64.26    6.28
  -6 -27  -6   46.48    5.30
  28   5  -7   12.11    3.92
  21  14  -8    1.68    4.03
  20  15  -7   30.63    4.93
  19  16  -6   24.43    4.44
  18  17  -5  100.84    6.02
  17  18  -4    2.52    2.86
  16  19  -3   40.20    4.46
  19  16   3   13.23    2.76
  15  20  -2   -0.95    2.47
  20  15   2   -1.37    2.29
  14  21  -1   17.54    3.14
  21  14   1   51.44    4.46
  13  22   0    7.34    3.06
  22  13   0   37.42    4.15
  12  23   1   11.73    3.19
  23  12  -1   14.18    2.98
  11  24   2    9.35    2.79
  24  11  -2   91.64    5.40
  10  25   3   83.43    5.32
  25  10  -3    1.42    2.68
   9  26   4  155.57    6.47
  26   9  -4   69.43    5.23
   8  27   5    7.72    3.32
  27   8  -5    1.92    3.51
  -8 -27  -5    8.86    3.38
   7  28   6    0.65    3.33
  28   7  -6   22.82    4.55
  -7 -28  -6    5.95    3.52
  29   6  -7  135.69    7.56
  21  16  -7   82.90    6.59
  20  17  -6    3.74    3.88
  19  18  -5   85.13    6.02
  18  19  -4   23.41    4.15
  17  20  -3    0.75    2.82
  16  21  -2    2.63    2.81
  21  16   2  102.57    5.12
  15  22  -1  229.58    7.18
  22  15   1   17.66    3.17
  14  23   0    1.38    2.95
  23  14   0  104.41    5.34
  13  24   1    6.44    3.10
  24  13  -1    1.55    2.71
  12  25   2   82.86    5.52
  25  12  -2    5.86    3.02
  11  26   3    4.54    3.15
  26  11  -3   51.44    4.87
  10  27   4    5.35    3.16
  27  10  -4    3.49    3.41
   9  28   5    9.77    3.47
  28   9  -5    0.53    3.22
  29   8  -6   55.87    6.64
  22  17  -7   -0.44    3.70
  21  18  -6   -0.94    3.83
  20  19  -5   14.82    4.28
  19  20  -4   14.49    3.72
  18  21  -3    0.70    3.42
  17  22  -2   81.71    6.13
  22  17   2   12.00    3.20
  16  23  -1   11.12    3.62
  23  16   1  167.78    6.32
  15  24   0   -0.08    3.17
  24  15   0   63.39    5.10
  14  25   1   18.37    3.68
  25  14  -1    1.07    2.91
  13  26   2   16.68    3.78
  26  13  -2   11.92    3.53
  12  27   3   29.40    3.89
  27  12  -3   26.10    4.17
  11  28   4   18.95    3.90
  28  11  -4   -0.19    3.51
  10  29   5    8.66    3.76
  29  10  -5    3.94    3.94
  30   9  -6    3.11    3.79
  22  19  -6    3.54    4.27
  21  20  -5   13.33    4.03
  20  21  -4   11.28    3.76
  19  22  -3   74.53    5.93
  18  23  -2   14.41    4.07
  17  24  -1   24.13    3.88
  24  17   1  132.26    6.22
  16  25   0   79.54    6.17
  25  16   0    0.88    3.05
  15  26   1    8.16    3.67
  26  15  -1  203.65    7.41
  14  27   2    1.20    3.40
  27  14  -2   -0.67    3.22
  13  28   3   -2.28    3.29
  28  13  -3   41.40    4.90
  12  29   4   21.67    4.18
  29  12  -4   91.52    6.89
  30  11  -5   40.64    5.43
  22  21  -5   31.11    5.28
  21  22  -4   22.26    4.41
  20  23  -3  133.94    7.67
  19  24  -2   -2.08    3.60
  18  25  -1    8.23    3.97
  25  18   1   15.42    5.68
  17  26   0    7.26    3.90
  26  17   0    6.66    3.49
  16  27   1   66.07    6.11
  27  16  -1   53.09    5.60
  15  28   2   12.03    3.95
  28  15  -2   -1.26    3.39
  14  29   3    2.55    3.45
  29  14  -3   30.79    4.81
  13  30   4    5.88    3.69
  30  13  -4    3.15    3.56
  22  23  -4    4.46    4.24
  21  24  -3    3.90    3.74
  20  25  -2   -0.02    3.91
  19  26  -1   27.84    4.72
  18  27   0    9.36    4.20
  27  18   0   18.16    4.08
  17  28   1   33.23    4.88
  28  17  -1    1.68    3.69
  16  29   2   21.23    4.55
  29  16  -2   13.31    4.21
  15  30   3   10.04    4.12
  30  15  -3    0.21    3.45
  22  25  -3    2.29    4.32
  21  26  -2   59.32    7.07
  20  27  -1    6.63    4.25
  19  28   0    4.09    4.08
  18  29   1    7.47    4.28
  29  18  -1    2.01    3.71
  17  30   2   29.86    4.98
  30  17  -2    2.52    3.99
   5  -5 -11    0.28    3.76
   4  -4 -10    5.25    2.84
   4  -4 -10    5.99    3.59
   3  -3  -9   20.97    2.81
   3  -3  -9   21.56    3.46
  -3   3   9   23.52    3.72
   2  -2  -8  132.72    4.80
   2  -2  -8  148.61    5.64
  -2   2   8  163.26    6.16
   1  -1  -7    9.07    1.85
   1  -1  -7    9.84    2.52
  -1   1   7   12.04    2.58
   0   0  -6  766.96    8.17
   0   0  -6  879.97    9.99
   0   0   6  936.55   10.38
  -1   1  -5    8.31    1.32
  -1   1  -5   10.80    1.80
   1  -1   5   10.00    1.77
  -2   2  -4   11.45    1.31
  -2   2  -4   14.43    1.63
   2  -2   4   17.11    1.76
  -3   3  -3  117.75    2.15
  -3   3  -3  120.77    2.79
   3  -3   3  137.69    2.91
  -4   4  -2  126.09    1.67
  -4   4  -2  126.59    2.31
  -4   4  -2  139.58    2.43
   4  -4   2  140.21    2.43
  -5   5  -1   94.67    1.20
  -5   5  -1   73.89    1.54
  -5   5  -1   82.18    1.58
   5  -5   1   89.19    1.17
  -6   6   0   64.07    1.37
   6  -6   0  202.98    2.16
  -7   7   1   89.80    1.90
   7  -7  -1  115.18    2.13
   7  -7  -1   90.99    1.93
  -8   8   2  189.91    3.24
   8  -8  -2  194.41    3.29
   8  -8  -2  194.06    3.29
  -9   9   3  112.81    3.04
   9  -9  -3  116.36    3.06
   9  -9  -3  117.56    3.10
 -10  10   4   36.09    2.58
  10 -10  -4   32.46    2.47
  10 -10  -4   38.02    2.65
 -11  11   5  874.07    9.85
  11 -11  -5  828.04    9.47
  11 -11  -5  894.90    9.96
 -12  12   6    2.17    1.92
  12 -12  -6   -1.09    1.68
  12 -12  -6   -0.05    1.86
 -13  13   7  113.17    5.13
 -13  13   7  113.37    4.98
  13 -13  -7  100.87    4.73
  13 -13  -7  115.69    5.17
 -14  14   8    1.20    2.93
 -14  14   8    2.87    2.40
  14 -14  -8    2.14    2.73
  14 -14  -8    0.83    2.88
 -15  15   9    0.77    3.03
  15 -15  -9   -1.24    3.00
  15 -15  -9   -0.52    2.98
 -16  16  10   58.38    6.07
  16 -16 -10   51.05    6.08
  16 -16 -10   54.21    5.95
   6  -4 -11    5.39    3.18
   6  -4 -11    6.07    3.68
   4  -6 -11    7.00    4.12
   5  -3 -10   25.66    3.61
   5  -3 -10   31.00    4.46
   3  -5 -10   -0.55    2.50
   3  -5 -10    4.35    3.46
   4  -2  -9    4.61    2.36
   4  -2  -9    5.29    2.82
   2  -4  -9   56.80    4.16
   2  -4  -9   61.43    4.85
  -2   4   9   66.50    4.96
  -4   2   9    5.64    2.77
   3  -1  -8   18.35    2.62
   3  -1  -8   20.38    3.05
   1  -3  -8    9.64    2.30
   1  -3  -8   12.57    2.96
  -1   3   8   12.60    2.96
  -3   1   8   17.59    2.88
   2   0  -7   60.75    3.34
   2   0  -7   72.40    3.99
   0  -2  -7   70.46    3.38
   0  -2  -7   69.20    3.92
   0   2   7   80.12    4.49
  -2   0   7   82.70    4.44
   1   1  -6   47.63    2.73
   1   1  -6   55.63    3.25
  -1  -1  -6  268.14    4.94
  -1  -1  -6  296.54    6.02
   1   1   6  306.69    6.19
  -1  -1   6   63.51    3.66
   0   2  -5    1.43    1.03
   0   2  -5    0.92    1.28
  -2   0  -5    1.11    1.01
  -2   0  -5    1.26    1.30
   2   0   5    2.03    1.55
   0  -2   5    2.43    1.37
  -1   3  -4   89.80    2.43
  -1   3  -4  105.85    3.04
  -3   1  -4  443.66    4.61
  -3   1  -4  491.26    5.95
   3  -1   4  540.05    6.41
   1  -3   4  108.91    3.05
  -2   4  -3    9.43    1.01
  -2   4  -3   10.27    1.22
  -4   2  -3   57.47    1.47
  -4   2  -3   63.85    2.05
   4  -2   3   66.92    2.22
   2  -4   3   11.88    1.25
  -3   5  -2   54.62    1.34
  -3   5  -2   57.32    1.69
  -3   5  -2   65.32    1.71
  -5   3  -2 1163.34    5.95
  -5   3  -2 1184.91    6.57
  -5   3  -2 1260.60    7.09
   5  -3   2 1271.60    7.20
   3  -5   2   66.37    1.77
  -4   6  -1  254.39    2.36
  -4   6  -1  194.87    2.48
  -4   6  -1  241.84    2.52
  -6   4  -1  445.91    1.88
  -6   4  -1  339.94    2.97
  -6   4  -1  358.82    3.33
   6  -4   1  417.57    1.84
  -5   7   0   84.23    1.62
  -7   5   0   20.95    0.78
   7  -5   0   62.80    1.22
   5  -7   0  247.99    2.57
  -6   8   1 1533.35    7.70
  -8   6   1   83.04    1.82
   8  -6  -1   81.10    1.78
   6  -8  -1 2180.92    9.08
   6  -8  -1 1582.16    7.81
  -7   9   2   47.23    1.84
  -9   7   2    3.63    0.89
   9  -7  -2    4.55    0.88
   9  -7  -2    3.38    0.92
   7  -9  -2   50.09    1.88
   7  -9  -2   47.98    1.87
  -8  10   3  394.27    5.37
 -10   8   3  306.96    4.69
  10  -8  -3  285.09    4.58
  10  -8  -3  310.21    4.72
   8 -10  -3  389.04    5.29
   8 -10  -3  403.08    5.42
  -9  11   4    8.69    1.57
  11  -9  -4   31.45    2.47
  11  -9  -4   36.22    2.40
   9 -11  -4    6.95    1.48
   9 -11  -4    9.27    1.61
 -10  12   5   65.05    3.35
 -12  10   5  677.97    8.80
  12 -10  -5  616.28    8.38
  12 -10  -5  685.65    8.86
  10 -12  -5   60.92    3.16
  10 -12  -5   68.08    3.42
 -11  13   6    7.91    2.36
 -11  13   6   10.21    2.17
 -13  11   6  770.98   10.34
  13 -11  -6  701.11    9.66
  13 -11  -6  773.03   10.36
  11 -13  -6    7.71    2.04
  11 -13  -6    9.13    2.43
 -12  14   7  230.40    6.64
 -12  14   7  238.03    6.59
 -14  12   7   37.85    3.87
 -14  12   7   37.12    3.65
  14 -12  -7   34.18    3.55
  14 -12  -7   38.29    3.88
  12 -14  -7  216.10    6.21
  12 -14  -7  234.18    6.69
 -13  15   8   42.64    5.00
 -13  15   8   32.93    4.00
 -15  13   8    1.05    2.62
 -15  13   8    0.24    2.28
  15 -13  -8   -2.06    2.26
  15 -13  -8    1.36    2.64
  13 -15  -8   38.65    4.10
  13 -15  -8   41.46    4.93
 -14  16   9   12.84    3.63
 -16  14   9   11.25    3.82
  16 -14  -9   10.43    3.19
  16 -14  -9   10.72    3.82
  14 -16  -9   12.14    3.29
  14 -16  -9   14.29    3.63
 -15  17  10   10.96    4.30
 -17  15  10    8.78    4.20
  17 -15 -10    8.49    3.72
  17 -15 -10    8.39    4.16
  15 -17 -10    9.60    3.55
  15 -17 -10   12.57    4.30
   7  -3 -11   81.87    5.91
   7  -3 -11   98.73    7.36
   3  -7 -11    4.33    4.09
   6  -2 -10   -1.54    2.60
   6  -2 -10    0.91    3.02
   2  -6 -10    0.55    3.81
   2  -6 -10    2.27    3.43
   5  -1  -9  317.47    7.63
   5  -1  -9  369.60    8.89
   1  -5  -9    4.18    2.30
   1  -5  -9    3.59    3.05
  -1   5   9    3.18    2.70
  -5   1   9  409.52    9.38
   4   0  -8   25.72    2.91
   4   0  -8   30.23    3.42
   0  -4  -8   26.29    2.83
   0  -4  -8   26.14    3.21
   0   4   8   37.00    4.38
  -4   0   8   38.11    3.81
   3   1  -7   19.56    2.44
   3   1  -7   26.98    3.09
  -1  -3  -7    1.34    1.53
  -1  -3  -7    2.02    1.92
   1   3   7   -1.04    1.84
  -3  -1   7   27.83    3.18
   2   2  -6   34.06    2.58
   2   2  -6   41.91    2.99
  -2  -2  -6  101.53    3.27
  -2  -2  -6  105.25    4.13
   2   2   6  112.74    4.19
  -2  -2   6   46.12    3.35
   1   3  -5  429.18    5.85
   1   3  -5  485.75    6.86
  -3  -1  -5  474.15    5.48
  -3  -1  -5  502.00    6.88
   3   1   5  550.06    7.30
  -1  -3   5  520.34    6.91
   0   4  -4  185.23    3.51
   0   4  -4  208.68    4.21
  -4   0  -4  193.75    3.06
  -4   0  -4  204.70    3.94
   4   0   4  226.75    4.32
   0  -4   4  229.48    4.22
  -1   5  -3   32.72    1.44
  -1   5  -3   34.75    1.85
  -5   1  -3    2.89    0.58
  -5   1  -3    2.59    0.79
   5  -1   3    4.11    1.08
   1  -5   3   39.50    1.83
  -2   6  -2   64.41    1.64
  -2   6  -2   66.37    1.91
  -2   6  -2   84.01    1.83
  -6   2  -2 1256.83    5.75
  -6   2  -2 1234.14    6.55
  -6   2  -2 1243.97    7.23
   6  -2   2 1278.20    7.39
   2  -6   2   79.89    1.83
  -3   7  -1  870.12    4.99
  -3   7  -1  633.95    4.60
  -3   7  -1  841.20    4.41
  -7   3  -1  608.20    3.75
  -7   3  -1  592.83    4.42
  -4   8   0  108.09    1.92
  -8   4   0  109.12    1.59
   8  -4   0  301.37    2.53
   4  -8   0  303.28    3.12
  -5   9   1  833.16    5.85
  -9   5   1  194.07    2.61
   9  -5  -1  225.97    2.98
   9  -5  -1  196.27    2.61
   5  -9  -1 1239.01    7.14
   5  -9  -1  878.42    6.02
  -6  10   2   18.72    1.52
  10  -6  -2   13.10    1.37
  10  -6  -2   14.27    1.37
   6 -10  -2   20.94    1.47
   6 -10  -2   19.63    1.46
  -7  11   3    5.44    1.19
 -11   7   3 1555.77   10.22
  11  -7  -3 1467.68   10.23
  11  -7  -3 1595.29   10.32
   7 -11  -3    5.17    1.19
   7 -11  -3    5.73    1.21
  -8  12   4  215.74    4.79
 -12   8   4   11.29    1.75
  12  -8  -4    9.73    1.60
  12  -8  -4   11.91    1.82
   8 -12  -4  211.78    4.55
   8 -12  -4  216.25    4.69
  -9  13   5    5.33    1.75
 -13   9   5  117.26    4.08
  13  -9  -5  105.36    3.90
  13  -9  -5  121.57    4.13
   9 -13  -5    6.51    1.73
   9 -13  -5    5.42    1.94
 -10  14   6   28.39    3.18
 -10  14   6   29.04    3.41
 -14  10   6  299.21    6.85
  14 -10  -6  276.63    6.39
  14 -10  -6  304.96    6.92
  10 -14  -6   24.60    2.91
  10 -14  -6   22.86    2.74
 -11  15   7   94.72    5.19
 -11  15   7   97.91    5.04
 -15  11   7    4.64    2.41
 -15  11   7    2.67    2.10
  15 -11  -7    0.63    2.39
  15 -11  -7    2.56    2.37
  11 -15  -7   85.70    4.47
  11 -15  -7   92.99    5.23
 -12  16   8   82.05    5.25
 -12  16   8   79.78    5.33
 -16  12   8  100.32    5.93
 -16  12   8   90.67    5.45
  16 -12  -8   85.24    5.03
  16 -12  -8   97.35    5.85
  12 -16  -8   79.79    4.84
  12 -16  -8   73.56    5.11
 -13  17   9   -2.74    2.90
 -17  13   9   38.34    4.46
  17 -13  -9   42.54    4.77
  17 -13  -9   43.26    5.08
  13 -17  -9    1.82    2.81
  13 -17  -9    1.67    3.01
 -14  18  10    2.17    4.02
 -18  14  10   16.79    4.55
  18 -14 -10   11.32    3.64
  18 -14 -10   19.30    4.61
  14 -18 -10    4.09    3.23
  14 -18 -10    5.34    4.01
   8  -2 -11   20.89    3.98
   8  -2 -11   24.03    4.83
   2  -8 -11   -1.41    3.72
   7  -1 -10   13.69    3.30
   7  -1 -10   16.66    3.76
   1  -7 -10  131.84    6.56
   6   0  -9   78.86    4.81
   6   0  -9   96.61    5.51
   0  -6  -9   87.01    4.61
   0  -6  -9   92.14    5.34
   0   6   9  103.39    5.64
  -6   0   9  106.37    5.94
   5   1  -8   28.83    3.45
   5   1  -8   31.98    3.87
  -1  -5  -8  164.88    5.02
  -1  -5  -8  170.46    5.94
   1   5   8  192.43    6.34
  -5  -1   8   41.94    4.37
   4   2  -7  106.70    4.23
   4   2  -7  122.96    4.82
  -2  -4  -7   69.61    3.30
  -2  -4  -7   72.77    4.22
   2   4   7   73.08    4.50
  -4  -2   7  136.63    5.09
   3   3  -6  164.49    4.45
   3   3  -6  181.25    4.98
  -3  -3  -6   42.76    2.45
  -3  -3  -6   43.91    3.21
   3   3   6   51.19    3.31
  -3  -3   6  196.83    5.00
   2   4  -5   38.56    2.43
   2   4  -5   41.30    2.85
  -4  -2  -5   64.22    2.39
  -4  -2  -5   66.96    3.09
   4   2   5   71.23    3.20
  -2  -4   5   46.18    2.62
   1   5  -4   49.70    2.24
   1   5  -4   60.58    2.55
  -5  -1  -4  223.07    3.20
  -5  -1  -4  218.57    4.03
   5   1   4  243.57    4.52
  -1  -5   4   61.15    2.56
   0   6  -3    3.06    0.81
   0   6  -3    4.45    0.99
   0   6  -3    5.40    1.15
  -6   0  -3    4.68    0.64
  -6   0  -3    3.95    0.89
   6   0   3    3.73    1.09
   0  -6   3    4.29    0.95
  -1   7  -2   63.61    1.85
  -1   7  -2   64.72    1.95
  -1   7  -2   77.83    1.76
  -7   1  -2  116.80    1.20
  -7   1  -2  115.71    2.08
  -7   1  -2  115.84    2.40
   7  -1   2  115.54    2.46
   1  -7   2   74.17    1.73
  -2   8  -1   90.05    1.92
  -2   8  -1   65.27    1.68
  -2   8  -1   95.20    1.49
  -8   2  -1 1600.83   10.17
  -8   2  -1 1518.54    7.32
   8  -2   1 2153.18    8.72
  -3   9   0  998.05    6.12
  -3   9   0  383.96    3.70
  -9   3   0   55.67    1.11
   9  -3   0  151.67    1.95
   3  -9   0 1029.54    6.22
  -4  10   1  168.62    2.80
 -10   4   1  916.16    5.39
  10  -4  -1 1061.61    6.48
  10  -4  -1  941.81    5.46
   4 -10  -1  267.48    3.57
   4 -10  -1  178.03    2.90
  -5  11   2   34.98    1.70
 -11   5   2   96.18    2.37
  11  -5  -2   92.81    2.48
  11  -5  -2   99.61    2.42
   5 -11  -2   41.10    2.00
   5 -11  -2   36.10    1.85
  -6  12   3  250.00    4.51
 -12   6   3    4.29    1.17
  12  -6  -3    4.20    1.18
  12  -6  -3    3.51    1.14
   6 -12  -3  260.58    4.57
   6 -12  -3  263.25    4.61
  -7  13   4   37.57    2.51
 -13   7   4   12.92    1.69
  13  -7  -4   11.85    1.72
  13  -7  -4   14.15    1.74
   7 -13  -4   39.31    2.66
   7 -13  -4   40.63    2.58
  -8  14   5   71.17    3.50
 -14   8   5  151.60    4.46
  14  -8  -5  135.44    4.34
  14  -8  -5  148.00    4.43
   8 -14  -5   72.00    3.38
   8 -14  -5   75.39    3.58
  -9  15   6    0.36    1.90
  -9  15   6    0.64    1.76
 -15   9   6   61.11    3.79
  15  -9  -6   49.06    3.53
  15  -9  -6   61.66    3.81
   9 -15  -6   -0.29    1.75
   9 -15  -6   -0.32    1.90
 -10  16   7   16.57    2.93
 -10  16   7   17.71    3.03
 -16  10   7  126.57    5.66
 -16  10   7  117.20    5.33
  16 -10  -7  111.95    5.31
  16 -10  -7  129.90    5.70
  10 -16  -7   16.96    2.94
  10 -16  -7   18.13    2.99
 -11  17   8   95.59    5.51
 -11  17   8  106.20    5.77
 -17  11   8   92.49    5.39
 -17  11   8   92.86    5.48
  17 -11  -8   75.87    4.94
  17 -11  -8   84.79    5.25
  11 -17  -8   94.09    5.51
  11 -17  -8   94.72    5.89
 -12  18   9    2.01    3.13
 -18  12   9   25.98    4.02
  18 -12  -9   29.31    4.03
  18 -12  -9   26.42    4.08
  12 -18  -9    3.35    3.16
  12 -18  -9    4.63    3.17
 -13  19  10   19.91    4.68
 -19  13  10   49.51    5.85
  19 -13 -10   57.76    6.26
  19 -13 -10   65.51    6.79
  13 -19 -10   16.65    4.11
  13 -19 -10   20.18    4.63
   9  -1 -11    2.25    3.29
   9  -1 -11    6.22    4.13
   1  -9 -11   11.20    3.85
   8   0 -10   -2.03    2.73
   8   0 -10    0.22    3.47
   0  -8 -10    4.08    3.45
   7   1  -9    1.77    2.19
   7   1  -9    3.17    3.10
  -1  -7  -9    4.60    2.41
  -1  -7  -9    3.67    2.69
   1   7   9    3.99    3.08
  -7  -1   9    2.54    2.59
   6   2  -8   33.06    3.65
   6   2  -8   42.93    4.52
  -2  -6  -8   66.55    3.74
  -2  -6  -8   64.11    4.77
   2   6   8   75.08    5.23
  -6  -2   8   41.31    4.38
   5   3  -7   31.07    2.86
   5   3  -7   36.28    3.47
  -3  -5  -7   57.78    3.29
  -3  -5  -7   59.73    4.04
   3   5   7   65.38    4.44
  -5  -3   7   40.27    3.74
   4   4  -6    8.45    1.73
   4   4  -6    8.57    2.00
  -4  -4  -6  116.91    3.48
  -4  -4  -6  117.40    4.06
   4   4   6  130.69    4.52
  -4  -4   6    7.88    2.00
   3   5  -5  111.56    3.57
   3   5  -5  132.49    4.10
  -5  -3  -5   11.94    1.41
  -5  -3  -5   13.64    1.88
   5   3   5   13.66    1.90
  -3  -5   5  138.16    3.95
   2   6  -4  684.51    7.11
   2   6  -4  783.98    7.88
  -6  -2  -4   88.28    2.17
  -6  -2  -4   86.63    2.80
   6   2   4   98.17    3.28
  -2  -6   4  838.98    7.52
   1   7  -3   17.80    1.56
   1   7  -3   20.38    1.71
   1   7  -3   22.89    1.51
  -7  -1  -3   64.06    1.51
  -7  -1  -3   63.56    2.03
   7   1   3   68.05    2.49
  -1  -7   3   21.78    1.50
   0   8  -2  183.28    3.17
   0   8  -2  185.83    3.11
   0   8  -2  235.72    2.77
  -8   0  -2  209.37    1.86
  -8   0  -2  211.31    2.68
  -8   0  -2  214.33    3.49
   8   0   2  210.74    1.86
   8   0   2  204.47    3.25
   0  -8   2  221.50    2.71
  -1   9  -1  477.62    4.64
  -1   9  -1  356.58    3.81
  -1   9  -1  539.27    3.14
  -9   1  -1 1531.53    7.21
  -9   1  -1 1340.88    7.14
   9  -1   1 1761.55    7.90
  -2  10   0  189.70    3.01
  -2  10   0   71.79    1.84
 -10   2   0    1.06    0.32
  10  -2   0    2.40    0.56
   2 -10   0  192.32    3.03
  -3  11   1   -0.04    0.62
 -11   3   1  139.53    2.15
  11  -3  -1  158.11    2.72
  11  -3  -1  144.52    2.20
   3 -11  -1    1.65    0.84
   3 -11  -1    0.26    0.62
  -4  12   2   16.76    1.39
 -12   4   2  292.20    3.81
  12  -4  -2  297.26    4.36
  12  -4  -2  298.60    3.86
   4 -12  -2   18.63    1.74
   4 -12  -2   16.45    1.54
  -5  13   3  182.74    3.98
 -13   5   3   54.14    2.22
  13  -5  -3   54.40    2.58
  13  -5  -3   57.83    2.41
   5 -13  -3  192.65    4.02
   5 -13  -3  180.22    3.88
  -6  14   4    1.07    1.30
 -14   6   4   27.85    2.22
  14  -6  -4   33.56    2.46
  14  -6  -4   30.35    2.29
   6 -14  -4    1.06    1.32
   6 -14  -4    1.30    1.33
  -7  15   5    5.18    2.00
  -7  15   5    5.51    1.84
 -15   7   5   64.18    3.54
  15  -7  -5   60.27    3.56
  15  -7  -5   65.06    3.56
   7 -15  -5    7.28    2.00
   7 -15  -5    6.34    2.04
  -8  16   6    1.56    2.24
  -8  16   6    2.79    2.08
 -16   8   6  191.25    5.74
  16  -8  -6  173.52    5.42
  16  -8  -6  195.72    5.81
   8 -16  -6    2.11    1.86
   8 -16  -6    1.06    2.20
  -9  17   7   24.98    3.24
  -9  17   7   32.16    3.54
 -17   9   7   60.16    4.32
  17  -9  -7   55.10    4.16
  17  -9  -7   63.64    4.82
   9 -17  -7   28.89    3.44
   9 -17  -7   28.40    3.34
 -10  18   8   86.35    5.36
 -10  18   8   89.00    5.57
 -18  10   8  139.07    6.09
 -18  10   8  130.72    5.77
  18 -10  -8  129.85    5.87
  18 -10  -8  151.78    6.28
  10 -18  -8   91.69    5.42
  10 -18  -8   92.27    5.42
 -11  19   9   44.40    5.00
 -19  11   9   32.58    4.29
  19 -11  -9   32.59    4.48
  19 -11  -9   32.92    4.28
  11 -19  -9   39.69    4.62
  11 -19  -9   42.81    4.95
 -12  20  10    0.46    3.92
 -20  12  10   16.26    4.59
  20 -12 -10   17.99    4.05
  20 -12 -10   24.17    4.81
  12 -20 -10    1.52    3.48
  12 -20 -10    0.27    3.82
  10   0 -11   10.15    3.73
  10   0 -11   17.45    4.59
   0 -10 -11   16.57    4.44
   9   1 -10   19.91    3.51
   9   1 -10   29.59    4.56
  -1  -9 -10    1.47    3.37
   8   2  -9    1.14    2.21
   8   2  -9   -0.98    3.00
  -2  -8  -9   33.82    4.08
   2   8   9   39.35    4.33
  -8  -2   9    0.68    2.82
   7   3  -8    9.32    2.37
   7   3  -8   12.29    3.16
  -3  -7  -8   78.54    3.93
  -3  -7  -8   76.27    4.55
   3   7   8   87.36    5.00
  -7  -3   8   16.45    3.00
   6   4  -7  229.17    5.98
   6   4  -7  258.18    6.49
  -4  -6  -7  258.26    5.32
  -4  -6  -7  253.28    6.40
   4   6   7  274.94    6.98
  -6  -4   7  271.60    6.52
   5   5  -6  139.55    4.34
   5   5  -6  164.32    4.88
  -5  -5  -6   16.34    1.86
  -5  -5  -6   16.77    2.33
   5   5   6   16.75    2.57
  -5  -5   6  183.25    4.98
   4   6  -5  158.69    4.13
   4   6  -5  179.85    4.52
  -6  -4  -5    1.13    1.11
  -6  -4  -5    2.44    1.45
   6   4   5    0.01    1.45
  -4  -6   5  194.69    4.47
   3   7  -4  794.94    7.94
   3   7  -4  909.87    8.56
  -7  -3  -4   48.41    1.83
  -7  -3  -4   46.04    2.24
   7   3   4   49.79    2.54
  -3  -7   4  978.60    8.04
   2   8  -3  352.62    4.92
   2   8  -3  402.03    5.10
   2   8  -3  470.58    4.69
  -8  -2  -3  318.95    3.17
  -8  -2  -3  312.94    3.98
   8   2   3  333.81    4.80
  -2  -8   3  439.21    4.62
   1   9  -2  321.64    4.37
   1   9  -2  329.68    4.12
   1   9  -2  429.82    3.57
  -9  -1  -2  262.03    2.90
   9   1   2  253.45    2.43
   9   1   2  249.98    3.72
  -1  -9   2  393.01    3.44
   0  10  -1  110.91    2.59
   0  10  -1   86.11    2.15
   0  10  -1  136.81    1.53
 -10   0  -1  125.33    1.46
 -10   0  -1   96.71    2.15
  10   0   1  123.71    1.83
  -1  11   0   86.45    2.34
  -1  11   0   35.17    1.51
 -11   1   0    2.03    0.34
  11  -1   0    5.50    0.76
   1 -11   0   87.73    2.35
  -2  12   1  872.19    6.46
 -12   2   1   71.08    1.59
  12  -2  -1   76.19    2.10
  12  -2  -1   70.71    1.58
   2 -12  -1 1755.20    9.97
  -3  13   2   30.23    1.79
 -13   3   2    0.55    0.74
  13  -3  -2    0.83    0.89
  13  -3  -2    1.18    0.78
   3 -13  -2   40.05    2.05
   3 -13  -2   30.60    1.81
  -4  14   3    3.59    1.15
 -14   4   3  112.28    2.92
  14  -4  -3  108.14    3.28
  14  -4  -3  112.82    3.03
   4 -14  -3    4.15    1.41
   4 -14  -3    3.97    1.19
  -5  15   4   59.69    3.10
  -5  15   4   45.60    2.79
 -15   5   4    8.71    1.52
  15  -5  -4   10.29    1.91
  15  -5  -4    9.98    1.71
   5 -15  -4   45.38    2.90
   5 -15  -4   58.42    2.92
  -6  16   5  345.46    6.71
  -6  16   5  378.53    6.78
 -16   6   5  250.73    5.51
  16  -6  -5  232.61    5.63
  16  -6  -5  264.30    5.65
   6 -16  -5  358.94    6.69
   6 -16  -5  348.83    6.75
  -7  17   6   45.00    3.58
  -7  17   6   55.87    3.94
 -17   7   6   83.61    4.09
  17  -7  -6   82.31    4.22
  17  -7  -6   88.77    4.19
   7 -17  -6   46.86    3.81
   7 -17  -6   48.72    3.67
  -8  18   7  516.34    9.47
  -8  18   7  555.96    9.75
 -18   8   7  145.57    5.60
  18  -8  -7  134.78    5.83
  18  -8  -7  146.76    5.97
   8 -18  -7  526.27    9.20
   8 -18  -7  519.11    9.48
  -9  19   8   16.22    3.56
  -9  19   8   21.19    3.52
 -19   9   8   62.18    4.88
 -19   9   8   49.79    4.81
  19  -9  -8   49.91    4.59
  19  -9  -8   63.25    4.96
   9 -19  -8   14.81    3.03
   9 -19  -8   19.65    3.63
 -10  20   9   -1.89    3.00
 -20  10   9   -0.96    2.98
  20 -10  -9    1.04    2.91
  20 -10  -9    0.15    3.04
  10 -20  -9    0.05    2.74
  10 -20  -9    0.56    2.97
 -11  21  10   17.88    4.21
 -21  11  10   95.11    7.34
  21 -11 -10   75.84    6.15
  21 -11 -10   93.89    7.34
  11 -21 -10   16.81    3.83
  11 -21 -10   20.39    4.26
  11   1 -11   25.14    4.06
  11   1 -11   35.27    4.89
  -1 -11 -11    1.12    3.82
   1  11  11   -1.65    3.78
  10   2 -10    2.93    3.02
  10   2 -10    1.05    3.18
  -2 -10 -10   -0.47    3.29
   9   3  -9    1.43    2.55
   9   3  -9    1.11    3.14
  -3  -9  -9   19.61    3.69
   3   9   9   24.21    4.00
  -9  -3   9    4.44    2.62
   8   4  -8    6.54    2.45
   8   4  -8    9.12    3.03
  -4  -8  -8  137.39    5.33
  -4  -8  -8  143.51    5.83
   4   8   8  156.21    6.02
  -8  -4   8    8.27    2.66
   7   5  -7   18.61    2.51
   7   5  -7   18.82    2.75
  -5  -7  -7   35.19    3.00
  -5  -7  -7   36.50    3.65
   5   7   7   43.37    4.18
  -7  -5   7   22.69    2.76
   6   6  -6  214.97    5.50
   6   6  -6  234.18    5.86
  -6  -6  -6   40.40    2.62
  -6  -6  -6   43.46    3.20
   6   6   6   45.01    3.67
  -6  -6   6  249.08    5.58
   5   7  -5  110.92    3.88
   5   7  -5  123.09    4.10
  -7  -5  -5  512.92    5.71
  -7  -5  -5  491.62    6.73
   7   5   5  534.66    7.51
  -5  -7   5  133.93    3.83
   4   8  -4  199.91    4.37
   4   8  -4  225.52    4.49
  -8  -4  -4   12.35    1.24
  -8  -4  -4   11.68    1.46
   8   4   4    9.91    1.57
  -4  -8   4  236.83    4.12
   3   9  -3   13.42    1.62
   3   9  -3   12.71    1.47
  -9  -3  -3  647.09    4.76
  -9  -3  -3  620.05    5.48
   9   3   3  649.50    6.64
  -3  -9   3   15.22    1.39
   2  10  -2  185.62    3.64
   2  10  -2  193.49    3.36
   2  10  -2  242.62    2.64
 -10  -2  -2   77.17    1.67
  10   2   2   71.10    1.64
  10   2   2   68.69    2.26
  -2 -10   2  221.98    2.55
   1  11  -1  173.93    3.40
   1  11  -1  131.21    2.62
   1  11  -1  221.85    1.68
 -11  -1  -1    5.72    0.53
 -11  -1  -1    4.15    0.79
  11   1   1    5.56    0.78
   0  12   0  117.61    2.86
   0  12   0   53.10    1.83
 -12   0   0   51.28    0.83
  12   0   0  127.63    2.48
   0 -12   0  115.11    2.82
  -1  13   1   66.99    2.38
  -1  13   1   31.20    1.55
 -13   1   1  879.61    4.92
  13  -1  -1 1004.08    7.35
  13  -1  -1  899.03    4.97
   1 -13  -1   67.70    2.39
  -2  14   2  105.68    2.81
 -14   2   2    4.07    0.89
  14  -2  -2    1.84    1.15
  14  -2  -2    3.48    0.86
   2 -14  -2  144.53    3.57
   2 -14  -2  108.99    2.86
  -3  15   3  404.72    5.78
  -3  15   3  517.95    6.07
 -15   3   3  250.61    4.23
  15  -3  -3  237.99    4.74
  15  -3  -3  257.82    4.29
   3 -15  -3  469.14    6.45
   3 -15  -3  403.99    5.78
  -4  16   4  204.19    4.85
  -4  16   4  233.60    4.94
  16  -4  -4   61.06    3.12
  16  -4  -4   63.91    2.99
   4 -16  -4  212.51    4.86
   4 -16  -4  203.03    4.85
  -5  17   5   15.85    2.25
  -5  17   5   15.30    2.09
  17  -5  -5   55.04    3.45
  17  -5  -5   64.77    3.34
   5 -17  -5   12.89    2.14
   5 -17  -5   15.07    2.23
  -6  18   6    3.22    2.24
  -6  18   6    2.70    2.14
 -18   6   6    3.22    2.13
  18  -6  -6    2.90    2.06
  18  -6  -6    4.60    2.25
   6 -18  -6    4.36    2.27
   6 -18  -6    2.60    2.04
  -7  19   7   37.70    4.43
  -7  19   7   36.55    4.19
 -19   7   7    3.20    2.69
  19  -7  -7    4.02    2.43
  19  -7  -7    6.95    2.82
   7 -19  -7   36.74    4.19
   7 -19  -7   36.94    4.42
  -8  20   8    7.79    3.25
  -8  20   8    6.90    3.04
 -20   8   8   20.72    3.70
 -20   8   8   18.57    3.40
  20  -8  -8   22.04    3.80
  20  -8  -8   19.96    3.75
   8 -20  -8    6.10    2.72
   8 -20  -8    6.60    3.16
  -9  21   9   -2.28    3.33
 -21   9   9   33.52    4.61
  21  -9  -9   25.11    3.99
  21  -9  -9   26.34    4.40
   9 -21  -9   -1.13    3.06
   9 -21  -9   -0.75    3.25
 -10  22  10    5.17    4.14
 -22  10  10    0.86    3.46
  22 -10 -10   -0.27    3.72
  22 -10 -10    0.57    3.51
  10 -22 -10    8.40    3.83
  10 -22 -10    3.39    4.01
  12   2 -11   -1.80    3.20
  12   2 -11    2.22    4.08
  -2 -12 -11   -0.20    3.82
   2  12  11   -0.85    3.85
  11   3 -10    0.40    3.01
  11   3 -10   -0.80    3.52
  -3 -11 -10   15.49    3.91
  10   4  -9  101.45    5.32
  10   4  -9  131.85    6.23
  -4 -10  -9    5.55    3.08
   4  10   9    5.73    3.26
 -10  -4   9  136.77    6.24
   9   5  -8   10.18    2.59
   9   5  -8   10.27    2.83
  -5  -9  -8  123.33    5.59
   5   9   8  144.22    5.92
  -9  -5   8   10.70    2.69
   8   6  -7  246.46    6.55
   8   6  -7  287.73    6.89
  -6  -8  -7    8.62    1.96
  -6  -8  -7    6.67    2.39
   6   8   7    7.91    2.63
  -8  -6   7  294.00    6.80
   7   7  -6  285.11    6.25
   7   7  -6  336.91    6.71
  -7  -7  -6   84.12    3.24
  -7  -7  -6   86.21    3.87
   7   7   6   89.13    4.12
  -7  -7   6  353.40    6.46
   6   8  -5   66.35    3.25
   6   8  -5   74.39    3.52
  -8  -6  -5  151.85    3.50
  -8  -6  -5  145.45    3.96
   8   6   5  160.70    4.68
  -6  -8   5   76.59    3.23
   5   9  -4  133.87    3.87
   5   9  -4  151.22    3.95
  -9  -5  -4    7.89    1.17
  -9  -5  -4    7.15    1.29
   9   5   4    6.64    1.48
  -5  -9   4  165.52    3.55
   4  10  -3  213.42    4.47
   4  10  -3  234.92    4.12
 -10  -4  -3  174.69    2.84
 -10  -4  -3  169.16    2.99
  10   4   3  172.61    2.82
  10   4   3  170.26    3.73
  -4 -10   3  263.91    3.56
   3  11  -2    4.45    1.20
   3  11  -2    3.78    1.00
 -11  -3  -2  255.42    2.74
  11   3   2  250.34    3.11
  11   3   2  233.70    3.79
  -3 -11   2    4.52    0.66
   2  12  -1   21.45    1.76
   2  12  -1   18.10    1.42
 -12  -2  -1  540.12    2.16
 -12  -2  -1  439.59    4.57
  12   2   1  533.29    4.60
   1  13   0  519.60    6.02
   1  13   0  248.90    3.53
  13   1   0  394.26    4.41
   0  14   1  244.65    4.30
   0  14   1  100.86    2.47
 -14   0   1  226.95    2.51
  14   0  -1  248.54    3.99
  14   0  -1  235.62    2.56
   0 -14  -1  243.21    4.29
  -1  15   2    0.94    0.88
  -1  15   2    1.62    0.87
 -15   1   2    7.55    1.01
  15  -1  -2    9.10    1.39
  15  -1  -2    8.66    1.04
   1 -15  -2    1.08    1.16
   1 -15  -2    1.71    0.99
  -2  16   3  210.91    4.36
  -2  16   3  297.98    4.75
 -16   2   3  316.38    4.68
  16  -2  -3  309.61    5.63
  16  -2  -3  336.09    4.81
   2 -16  -3  266.46    5.07
   2 -16  -3  220.07    4.46
  -3  17   4   64.36    3.23
  -3  17   4   82.10    3.34
  17  -3  -4    4.70    1.69
  17  -3  -4    5.11    1.59
   3 -17  -4   73.12    3.57
   3 -17  -4   69.35    3.30
  -4  18   5    7.14    2.08
  -4  18   5    4.81    1.86
  18  -4  -5  240.66    5.98
  18  -4  -5  275.37    5.87
   4 -18  -5    6.05    2.10
   4 -18  -5    5.19    2.05
  -5  19   6   -0.33    2.17
  -5  19   6    1.38    2.13
  19  -5  -6   66.79    4.14
  19  -5  -6   77.93    4.36
   5 -19  -6    0.88    2.14
   5 -19  -6    0.00    2.17
  -6  20   7    3.98    2.45
  -6  20   7    3.49    2.39
 -20   6   7  105.58    5.00
  20  -6  -7   96.43    5.49
  20  -6  -7  106.87    5.02
   6 -20  -7    3.03    2.33
   6 -20  -7    1.19    2.33
  -7  21   8   68.80    5.08
  -7  21   8   87.37    5.57
 -21   7   8   28.61    3.95
 -21   7   8   22.22    3.35
  21  -7  -8   29.75    4.17
  21  -7  -8   31.81    3.85
   7 -21  -8   79.98    5.45
   7 -21  -8   76.56    5.22
  -8  22   9    3.64    3.61
 -22   8   9   16.51    3.74
  22  -8  -9   11.77    3.50
  22  -8  -9   15.48    3.97
   8 -22  -9    1.63    3.28
   8 -22  -9    5.25    3.62
  -9  23  10   16.64    4.16
 -23   9  10    1.17    3.84
  23  -9 -10    5.67    3.62
  23  -9 -10    4.29    3.93
   9 -23 -10   20.19    4.39
   9 -23 -10   18.69    4.25
  13   3 -11    9.83    3.78
  13   3 -11   10.00    4.06
  -3 -13 -11    6.60    4.11
   3  13  11   -0.15    3.88
  12   4 -10   70.28    5.77
  12   4 -10   89.63    6.16
  -4 -12 -10  114.06    6.81
   4  12  10  107.05    6.77
  11   5  -9  106.30    5.92
  11   5  -9  128.97    6.64
  -5 -11  -9   -0.44    2.47
   5  11   9   -0.90    3.35
 -11  -5   9  129.41    6.11
  10   6  -8   19.24    3.02
  10   6  -8   17.39    3.41
  -6 -10  -8   53.92    4.55
   6  10   8   66.46    5.26
 -10  -6   8   16.07    2.91
   9   7  -7  227.60    6.54
   9   7  -7  265.12    6.95
  -7  -9  -7   30.74    3.75
  -7  -9  -7   32.60    3.64
   7   9   7   37.91    3.78
  -9  -7   7  269.50    6.59
   8   8  -6    2.14    1.78
   8   8  -6    3.40    2.11
  -8  -8  -6  187.66    4.39
  -8  -8  -6  183.97    4.99
   8   8   6  198.71    5.77
  -8  -8   6    3.07    1.79
   7   9  -5  381.74    7.00
   7   9  -5  409.84    6.69
  -9  -7  -5  187.34    3.90
  -9  -7  -5  178.42    4.34
   9   7   5  206.50    5.21
  -7  -9   5  439.61    6.29
   6  10  -4  157.51    4.34
   6  10  -4  180.96    4.30
 -10  -6  -4  257.57    3.95
 -10  -6  -4  241.33    4.19
  10   6   4  259.04    5.09
  -6 -10   4  192.28    3.74
   5  11  -3   37.04    2.63
   5  11  -3   44.80    2.32
 -11  -5  -3  182.29    3.12
 -11  -5  -3  175.60    3.05
  11   5   3  181.70    3.11
  11   5   3  183.54    3.93
  -5 -11   3   48.51    1.83
   4  12  -2   50.34    2.52
   4  12  -2   57.10    2.21
 -12  -4  -2    5.83    0.70
  12   4   2    5.18    0.98
  12   4   2    4.95    1.11
  -4 -12   2   59.14    1.40
   3  13  -1  222.07    4.39
   3  13  -1  170.02    3.13
  13   3   1    0.97    0.86
   2  14   0   25.10    1.96
   2  14   0   12.73    1.41
  14   2   0  130.58    2.98
   1  15   1  115.08    3.42
   1  15   1   48.46    1.88
   1  15   1  132.78    2.14
 -15  -1   1    5.83    0.65
  15   1  -1    4.16    1.16
  15   1  -1    5.67    0.67
  -1 -15  -1  117.87    3.45
   0  16   2    9.52    1.23
   0  16   2   19.40    1.62
 -16   0   2   16.46    1.42
  16   0  -2   15.65    1.88
  16   0  -2   17.38    1.45
   0 -16  -2   13.84    1.74
   0 -16  -2   10.16    1.30
  -1  17   3  117.21    3.46
  -1  17   3  173.58    3.75
  17  -1  -3    7.86    1.68
  17  -1  -3    3.12    1.20
   1 -17  -3  157.22    4.37
   1 -17  -3  119.74    3.52
  -2  18   4    1.10    1.31
  -2  18   4    1.10    1.40
  18  -2  -4  534.98    8.03
  18  -2  -4  581.56    7.19
   2 -18  -4    0.82    1.79
   2 -18  -4    0.93    1.35
  -3  19   5  287.22    6.19
  -3  19   5  352.33    6.67
  19  -3  -5   51.04    3.57
  19  -3  -5   60.99    3.52
   3 -19  -5  327.16    6.83
   3 -19  -5  299.57    6.29
  -4  20   6   42.07    3.60
  -4  20   6   50.02    3.93
  20  -4  -6   88.70    4.98
  20  -4  -6  109.29    4.82
   4 -20  -6   44.79    4.03
   4 -20  -6   48.99    3.74
  -5  21   7   41.44    4.07
  -5  21   7   40.48    4.23
 -21   5   7   10.14    2.93
  21  -5  -7   10.05    3.10
  21  -5  -7    9.58    2.88
   5 -21  -7   43.60    4.46
   5 -21  -7   35.25    3.93
  -6  22   8   49.19    5.22
  -6  22   8   57.67    5.16
 -22   6   8   15.84    3.62
 -22   6   8   11.49    2.99
  22  -6  -8   13.33    3.65
  22  -6  -8   13.54    3.54
   6 -22  -8   55.73    5.21
   6 -22  -8   53.36    5.33
  -7  23   9  154.94    7.58
 -23   7   9   10.88    3.49
  23  -7  -9   12.21    4.03
  23  -7  -9   13.07    3.62
   7 -23  -9  161.71    6.85
   7 -23  -9  158.66    7.60
  -8  24  10   -1.14    3.34
 -24   8  10    7.26    4.21
  24  -8 -10    4.86    4.13
  24  -8 -10    6.38    4.25
   8 -24 -10    2.47    3.74
   8 -24 -10    1.35    3.46
  13   5 -10   61.00    5.81
  13   5 -10   69.31    5.85
  -5 -13 -10  118.18    6.33
   5  13  10  111.86    6.29
  12   6  -9   77.49    5.18
  12   6  -9   97.84    6.24
  -6 -12  -9   67.16    5.34
   6  12   9   57.92    5.26
 -12  -6   9   93.75    5.65
  11   7  -8   -1.41    2.51
  11   7  -8   -2.62    2.70
  -7 -11  -8   44.18    4.36
   7  11   8   53.44    5.00
 -11  -7   8    2.63    2.46
  10   8  -7  467.68    8.90
  10   8  -7  561.67    9.56
  -8 -10  -7  150.71    5.29
   8  10   7  163.08    6.04
 -10  -8   7  566.71    8.81
   9   9  -6    5.45    2.31
   9   9  -6    8.06    2.24
  -9  -9  -6   80.65    3.40
  -9  -9  -6   85.95    3.83
   9   9   6   87.77    4.48
  -9  -9   6    9.27    2.02
   8  10  -5   18.95    2.59
   8  10  -5   20.28    2.50
 -10  -8  -5   82.75    3.04
 -10  -8  -5   76.48    3.31
  10   8   5   83.94    3.94
  -8 -10   5   19.82    2.42
   7  11  -4   32.75    3.00
   7  11  -4   36.29    2.62
 -11  -7  -4  123.47    3.11
 -11  -7  -4  112.14    3.10
  11   7   4  120.27    3.07
  11   7   4  125.12    3.90
  -7 -11   4   38.09    2.24
   6  12  -3  149.97    4.21
   6  12  -3  164.40    3.76
 -12  -6  -3    6.66    1.04
  12   6   3    7.00    1.27
  12   6   3    7.19    1.48
  -6 -12   3  177.49    2.93
   5  13  -2  424.25    6.41
   5  13  -2  447.07    5.32
 -13  -5  -2    6.24    0.72
  13   5   2    7.16    1.15
  13   5   2    6.38    0.71
  -5 -13   2  484.81    3.17
   4  14  -1    2.31    1.31
   4  14  -1    2.03    0.98
  14   4   1  154.74    3.13
   3  15   0    3.28    1.34
   3  15   0    3.46    0.97
  15   3   0  421.60    5.27
   2  16   1   78.00    3.20
   2  16   1   35.35    1.77
   2  16   1   93.55    1.84
 -16  -2   1  192.69    2.21
  16   2  -1  211.95    4.25
  16   2  -1  199.18    2.24
  -2 -16  -1   82.97    3.24
   1  17   2    2.30    1.54
   1  17   2    5.96    1.17
   1  17   2    1.25    0.92
 -17  -1   2   12.82    1.35
  17   1  -2   12.97    1.88
  17   1  -2   13.49    1.39
  -1 -17  -2    4.46    1.68
  -1 -17  -2    8.70    1.32
   0  18   3  143.89    3.80
   0  18   3  221.14    4.22
  18   0  -3  189.23    4.94
  18   0  -3  200.47    3.88
   0 -18  -3  200.27    4.83
   0 -18  -3  148.90    3.90
  -1  19   4   36.34    2.82
  -1  19   4   53.83    3.11
  19  -1  -4    9.37    2.11
  19  -1  -4   11.21    1.83
   1 -19  -4   46.26    3.48
   1 -19  -4   38.90    2.91
  -2  20   5    6.14    2.01
  -2  20   5    9.20    2.08
  20  -2  -5    1.69    1.98
  20  -2  -5    1.54    1.82
   2 -20  -5    7.88    2.40
   2 -20  -5    6.82    1.89
  -3  21   6   19.38    2.91
  -3  21   6   17.69    2.59
  21  -3  -6  342.29    8.13
  21  -3  -6  391.23    7.67
   3 -21  -6   15.52    3.00
   3 -21  -6   19.98    2.94
  -4  22   7   24.72    3.47
  -4  22   7   28.41    3.48
 -22   4   7    0.29    2.57
  22  -4  -7   -0.46    2.77
  22  -4  -7    0.65    2.57
   4 -22  -7   25.92    3.54
   4 -22  -7   28.34    3.53
  -5  23   8   -0.06    2.97
  -5  23   8    2.17    2.71
 -23   5   8   18.21    3.68
 -23   5   8   15.24    3.15
  23  -5  -8   11.54    3.36
  23  -5  -8   21.83    3.82
   5 -23  -8    0.27    3.05
   5 -23  -8    2.81    3.01
  -6  24   9    0.81    3.10
 -24   6   9   32.46    4.29
  24  -6  -9   32.73    4.92
  24  -6  -9   36.52    4.46
   6 -24  -9   -1.15    3.37
   6 -24  -9    0.28    3.06
  25  -7 -10    5.51    4.22
  25  -7 -10    9.91    4.30
   7 -25 -10    0.85    3.82
   7 -25 -10    1.76    3.54
  14   6 -10    1.79    3.41
  14   6 -10    2.79    3.35
  -6 -14 -10    5.78    3.40
   6  14  10    4.28    3.43
  13   7  -9    2.01    2.73
  13   7  -9    1.80    3.30
  -7 -13  -9   31.98    4.08
   7  13   9   29.37    3.98
 -13  -7   9    6.64    3.31
  12   8  -8    6.37    3.03
  12   8  -8    5.82    3.08
  -8 -12  -8   20.08    3.29
   8  12   8   21.49    3.37
   8  12   8   23.34    3.76
 -12  -8   8    8.13    2.64
  11   9  -7    4.54    2.38
  11   9  -7    6.35    2.70
  -9 -11  -7   76.33    4.29
   9  11   7   74.47    4.27
   9  11   7   84.06    5.03
 -11  -9   7    6.33    2.28
  10  10  -6   58.43    3.96
  10  10  -6   70.24    4.20
 -10 -10  -6   51.74    4.73
 -10 -10  -6   49.95    3.49
  10  10   6   52.06    3.92
 -10 -10   6   73.68    3.75
   9  11  -5   61.98    3.72
   9  11  -5   68.04    3.63
 -11  -9  -5   19.46    2.05
 -11  -9  -5   17.20    2.01
  11   9   5   18.55    1.96
  11   9   5   19.70    2.45
  -9 -11   5   72.90    3.15
   8  12  -4    0.77    1.83
   8  12  -4    0.96    1.48
 -12  -8  -4  214.79    4.10
 -12  -8  -4  201.23    3.98
  12   8   4  216.15    4.10
  12   8   4  202.78    3.99
  12   8   4  226.45    4.99
  -8 -12   4   -0.15    1.08
   7  13  -3  107.20    3.89
   7  13  -3  119.47    3.38
 -13  -7  -3  297.99    3.79
  13   7   3  318.43    4.59
  13   7   3  304.31    3.82
  13   7   3  311.48    5.09
  -7 -13   3  126.09    2.51
   6  14  -2    2.15    1.47
   6  14  -2    2.76    1.14
 -14  -6  -2    9.28    0.92
  14   6   2    9.47    1.37
  14   6   2    9.42    0.91
  -6 -14   2    2.96    0.51
   5  15  -1   14.10    1.89
   5  15  -1   14.03    1.62
  15   5   1   62.91    2.54
   4  16   0  343.98    5.81
   4  16   0  198.09    3.52
  16   4   0  151.95    3.63
   3  17   1   22.88    2.32
   3  17   1    9.15    1.24
   3  17   1   22.61    1.23
 -17  -3   1  310.63    2.61
  17   3  -1  350.50    5.58
  17   3  -1  318.83    2.64
  -3 -17  -1   19.77    2.21
   2  18   2  612.43    7.87
   2  18   2  305.94    4.78
   2  18   2  721.26    5.95
 -18  -2   2    9.01    1.09
  18   2  -2    6.49    1.77
  18   2  -2    9.36    1.12
  -2 -18  -2  632.00    7.99
   1  19   3  631.40    8.43
   1  19   3  431.39    6.23
   1  19   3  716.83    7.14
  19   1  -3    8.34    2.08
  19   1  -3    9.57    1.48
  -1 -19  -3  647.50    8.56
  -1 -19  -3  455.11    6.42
   0  20   4   27.90    2.71
   0  20   4   39.08    2.81
  20   0  -4   31.44    3.53
  20   0  -4   38.10    2.83
   0 -20  -4   33.10    3.45
   0 -20  -4   25.96    2.72
  -1  21   5    1.94    1.66
  -1  21   5    0.47    1.78
  21  -1  -5   76.92    4.32
  21  -1  -5   81.50    4.02
   1 -21  -5   -1.94    2.14
   1 -21  -5   -0.49    1.71
  -2  22   6  257.77    6.74
  -2  22   6  324.16    7.20
  22  -2  -6   84.17    4.89
  22  -2  -6   90.83    4.58
   2 -22  -6  297.99    7.39
   2 -22  -6  259.65    6.56
  -3  23   7    2.81    2.39
  -3  23   7    2.30    2.48
 -23   3   7  139.17    5.76
  23  -3  -7  109.68    5.73
  23  -3  -7  136.48    5.75
   3 -23  -7    3.54    2.57
   3 -23  -7    2.53    2.37
  -4  24   8   38.58    4.47
  -4  24   8   47.98    5.11
 -24   4   8   30.35    3.98
 -24   4   8   26.46    3.59
  24  -4  -8   27.26    4.03
  24  -4  -8   34.46    4.09
   4 -24  -8   46.56    5.25
   4 -24  -8   40.31    4.47
  -5  25   9    4.98    3.68
 -25   5   9    4.82    3.59
  25  -5  -9    3.65    3.87
  25  -5  -9    6.57    3.82
   5 -25  -9    2.46    3.52
   5 -25  -9    8.13    3.74
  15   7 -10   27.54    4.50
  15   7 -10   24.62    4.64
  -7 -15 -10    3.08    3.21
   7  15  10    1.60    3.25
  14   8  -9    0.24    2.85
  14   8  -9   -1.89    3.06
  -8 -14  -9   15.36    3.40
   8  14   9   14.17    3.45
  13   9  -8    2.95    2.98
  13   9  -8    2.69    2.95
  -9 -13  -8   39.96    4.26
   9  13   8   40.71    4.31
   9  13   8   50.09    5.11
  12  10  -7   32.95    3.86
  12  10  -7   33.29    4.07
 -10 -12  -7  186.98    5.68
  10  12   7  178.66    5.61
  10  12   7  204.33    6.52
  11  11  -6   41.11    4.24
  11  11  -6   49.76    3.92
 -11 -11  -6   11.68    2.22
  11  11   6   11.45    2.22
  11  11   6   10.08    2.55
 -11 -11   6   51.58    3.22
  10  12  -5   29.11    3.26
  10  12  -5   29.98    3.07
 -12 -10  -5   64.44    3.14
 -12 -10  -5   63.46    3.11
  12  10   5   70.75    3.22
  12  10   5   61.08    3.08
  12  10   5   74.87    3.89
 -10 -12   5   34.15    2.68
   9  13  -4   37.96    3.19
   9  13  -4   39.68    2.84
 -13  -9  -4    5.71    1.54
 -13  -9  -4    3.21    1.30
  13   9   4    5.16    1.54
  13   9   4    4.27    1.34
  13   9   4    1.58    1.70
  -9 -13   4   43.14    2.29
   8  14  -3  116.32    4.25
   8  14  -3  127.98    3.55
 -14  -8  -3    4.93    1.02
  14   8   3    6.08    1.47
  14   8   3    5.04    1.00
  14   8   3    4.84    1.50
  -8 -14   3  134.96    2.52
   7  15  -2  369.80    6.55
   7  15  -2  386.51    5.21
 -15  -7  -2    3.56    0.59
  15   7   2    6.38    1.46
  15   7   2    3.31    0.56
   6  16  -1    6.37    1.75
   6  16  -1    6.09    1.24
  16   6   1  128.66    3.52
   5  17   0  142.08    4.20
   5  17   0   90.83    2.68
  17   5   0  340.40    5.43
   4  18   1    0.79    1.56
   4  18   1    0.87    1.02
   4  18   1    2.74    0.72
 -18  -4   1   58.57    1.21
  18   4  -1   74.86    3.27
  18   4  -1   62.36    1.25
   3  19   2    0.82    1.58
   3  19   2    0.10    0.94
   3  19   2    0.68    0.97
 -19  -3   2   53.35    1.95
  19   3  -2   56.40    3.38
  19   3  -2   57.70    2.01
  -3 -19  -2    1.21    1.60
   2  20   3    4.51    1.89
   2  20   3    3.33    1.34
   2  20   3    5.44    1.52
 -20  -2   3   44.05    2.41
  20   2  -3   42.48    3.20
  20   2  -3   47.26    2.49
  -2 -20  -3    5.22    1.95
  -2 -20  -3    3.66    1.48
   1  21   4   66.54    3.40
   1  21   4  101.55    3.79
  21   1  -4   22.07    2.76
  21   1  -4   26.09    2.64
  -1 -21  -4   98.76    4.57
  -1 -21  -4   69.68    3.48
   0  22   5    5.61    2.07
   0  22   5    7.82    2.14
  22   0  -5    8.37    2.53
  22   0  -5    7.19    2.07
   0 -22  -5    7.17    2.59
   0 -22  -5    8.09    2.21
  -1  23   6  146.73    5.50
  -1  23   6  189.91    5.92
 -23   1   6   82.51    4.37
  23  -1  -6   79.72    4.98
  23  -1  -6   82.95    4.46
   1 -23  -6  176.43    6.26
   1 -23  -6  147.49    5.51
  -2  24   7  112.10    5.65
  -2  24   7  142.83    6.01
 -24   2   7   35.87    4.32
  24  -2  -7   31.50    3.97
  24  -2  -7   38.87    4.41
   2 -24  -7  121.08    5.63
   2 -24  -7  114.33    5.67
  -3  25   8   22.75    3.94
  -3  25   8   23.33    3.86
 -25   3   8   -1.24    3.04
 -25   3   8   -0.94    2.60
  25  -3  -8    2.59    3.11
  25  -3  -8    0.34    3.12
   3 -25  -8   22.55    3.64
   3 -25  -8   18.86    3.73
  -4  26   9    0.94    3.02
 -26   4   9   13.28    3.90
  26  -4  -9    7.25    4.09
  26  -4  -9   10.18    3.83
   4 -26  -9    2.92    3.64
   4 -26  -9    2.99    3.08
  16   8 -10   -1.45    3.51
  16   8 -10   -1.74    3.58
  15   9  -9   13.29    3.92
  15   9  -9   18.02    4.04
  14  10  -8   14.19    3.61
  14  10  -8   16.00    3.51
  10  14   8   59.36    5.10
  10  14   8   67.14    5.46
  13  11  -7    4.15    2.92
  13  11  -7    4.26    2.70
  11  13   7  136.00    5.09
  11  13   7  151.59    6.07
  12  12  -6   11.33    2.97
  12  12  -6   13.52    2.70
  12  12   6   84.58    3.98
  12  12   6   99.73    4.83
  11  13  -5  114.67    5.24
  11  13  -5  128.38    4.56
 -13 -11  -5   23.17    3.44
  13  11   5   21.86    2.71
  13  11   5   19.84    2.15
  13  11   5   24.20    2.76
  10  14  -4  221.71    5.98
  10  14  -4  248.96    5.22
  14  10   4  209.83    4.59
  14  10   4  192.00    3.90
  14  10   4  207.75    5.10
   9  15  -3    3.39    1.94
   9  15  -3    6.46    1.53
  15   9   3  253.26    4.74
  15   9   3  229.27    4.72
   8  16  -2    4.39    1.86
   8  16  -2    8.26    1.46
  16   8   2  291.74    4.96
   7  17  -1  102.36    4.00
   7  17  -1   92.02    2.82
  17   7   1    6.28    1.63
   6  18   0   12.96    2.08
   6  18   0   10.88    1.47
  18   6   0   78.73    3.33
   5  19   1  110.84    4.07
   5  19   1   54.37    2.42
   5  19   1  114.54    1.83
  19   5  -1   78.13    3.31
   4  20   2  138.61    4.75
   4  20   2   65.96    2.70
   4  20   2  155.75    3.06
  20   4  -2   64.63    3.41
  20   4  -2   65.17    2.58
  -4 -20  -2  136.23    4.71
   3  21   3   33.13    3.15
   3  21   3   18.32    2.09
   3  21   3   33.66    2.48
  21   3  -3  182.57    5.54
  21   3  -3  181.98    3.75
  -3 -21  -3   32.37    3.17
  -3 -21  -3   19.33    2.21
   2  22   4   43.97    3.86
   2  22   4   35.90    2.84
   2  22   4   51.40    3.18
  22   2  -4  317.85    7.38
  22   2  -4  335.16    5.66
  -2 -22  -4   49.52    4.03
  -2 -22  -4   36.17    2.91
   1  23   5   10.36    2.27
   1  23   5   18.93    2.54
  23   1  -5   93.56    4.93
  23   1  -5  105.14    4.31
  -1 -23  -5   16.12    3.02
  -1 -23  -5   11.38    2.36
   0  24   6    0.37    2.23
   0  24   6    0.33    2.29
 -24   0   6    2.19    2.64
  24   0  -6    1.30    2.60
  24   0  -6    1.47    2.26
   0 -24  -6    1.18    2.42
   0 -24  -6    0.91    2.23
  -1  25   7    4.18    2.64
  -1  25   7    4.16    2.88
 -25   1   7    9.35    4.43
  25  -1  -7    7.62    3.51
  25  -1  -7    9.46    3.01
   1 -25  -7    1.00    2.65
   1 -25  -7    4.08    2.66
  -2  26   8    8.90    3.34
  -2  26   8   12.04    3.52
 -26   2   8   54.64    6.37
  26  -2  -8   50.45    5.39
  26  -2  -8   51.30    5.93
   2 -26  -8   10.43    3.69
   2 -26  -8    9.12    3.34
  -3  27   9   11.07    3.74
  27  -3  -9    0.20    3.45
   3 -27  -9   11.21    4.05
   3 -27  -9   11.54    3.73
  16  10  -9   10.26    3.95
  16  10  -9    9.49    3.62
  15  11  -8   21.19    4.04
  15  11  -8   20.98    3.62
  11  15   8    5.78    3.22
  14  12  -7    8.86    3.29
  14  12  -7    8.47    2.91
  12  14   7  223.76    6.93
  13  13  -6    1.60    2.39
  13  13  -6    1.47    2.25
  13  13   6    1.26    2.42
  12  14  -5  235.78    6.99
  12  14  -5  275.99    6.26
  14  12   5  412.78    7.36
  11  15  -4    8.43    2.40
  11  15  -4    2.10    1.72
  15  11   4   19.05    2.25
  15  11   4   16.77    2.28
  10  16  -3   32.59    3.34
  10  16  -3   39.40    2.71
  16  10   3   99.73    3.64
   9  17  -2   26.80    3.00
   9  17  -2   27.31    2.27
  17   9   2   36.49    2.84
   8  18  -1  151.33    5.09
   8  18  -1  140.53    3.44
  18   8   1  460.10    6.64
   7  19   0    1.39    1.82
   7  19   0    0.03    1.22
  19   7   0   87.31    3.66
   6  20   1  118.32    4.39
   6  20   1   60.57    2.62
  20   6  -1    2.42    1.81
   5  21   2   15.43    2.67
   5  21   2    5.49    1.37
  21   5  -2    0.06    1.93
  -5 -21  -2   17.49    2.64
   4  22   3   50.77    3.97
   4  22   3   25.05    2.25
  22   4  -3  101.89    4.48
  -4 -22  -3   51.23    4.02
   3  23   4    1.78    2.41
   3  23   4    2.45    1.56
  23   3  -4    1.27    2.17
  -3 -23  -4    2.67    2.48
  -3 -23  -4    2.13    1.71
   2  24   5   12.29    2.89
   2  24   5   10.33    2.24
  24   2  -5   74.32    5.21
  -2 -24  -5   17.69    3.12
  -2 -24  -5   12.25    2.38
   1  25   6   59.57    4.22
  25   1  -6   -1.05    2.62
  -1 -25  -6   75.37    5.25
  -1 -25  -6   55.69    4.19
   0  26   7    7.42    2.89
  26   0  -7   10.60    3.42
   0 -26  -7   10.91    3.50
   0 -26  -7    7.65    2.89
  -1  27   8   20.31    3.64
  27  -1  -8    1.82    3.35
   1 -27  -8   21.40    4.07
   1 -27  -8   16.79    3.51
  -2  28   9    2.69    3.34
  28  -2  -9    3.99    3.77
   2 -28  -9    7.55    3.58
  17  11  -9    1.48    3.33
  17  11  -9   -0.64    3.30
  16  12  -8    5.96    3.20
  16  12  -8    6.10    3.23
  12  16   8   27.05    4.06
  15  13  -7   61.77    5.10
  15  13  -7   78.04    5.05
  13  15   7    3.37    2.86
  14  14  -6   38.85    4.32
  14  14  -6   43.64    4.29
  14  14   6   10.90    2.79
  13  15  -5  267.78    7.59
  13  15  -5  311.14    6.60
  15  13   5    2.22    2.17
  12  16  -4  108.09    5.35
  12  16  -4  128.78    4.32
  16  12   4   12.43    2.22
  16  12   4    9.50    2.13
  11  17  -3    0.50    2.33
  11  17  -3    1.61    1.56
  17  11   3   91.78    3.80
  10  18  -2    1.71    2.08
  10  18  -2    2.47    1.43
  18  10   2   25.20    2.74
   9  19  -1  244.38    6.17
   9  19  -1  231.99    4.28
  19   9   1   40.05    3.05
   8  20   0  134.56    5.07
   8  20   0  102.79    3.15
  20   8   0  129.37    4.44
   7  21   1  135.02    4.86
   7  21   1   73.60    2.97
  21   7  -1    3.71    1.85
   6  22   2  114.21    4.67
   6  22   2   55.63    2.81
  22   6  -2   51.01    3.58
   5  23   3   22.61    3.05
   5  23   3    8.99    1.69
  23   5  -3   19.99    3.07
  -5 -23  -3   21.06    3.00
   4  24   4    1.63    2.51
   4  24   4   -0.12    1.49
  24   4  -4  141.17    5.61
  -4 -24  -4    1.01    2.52
  -4 -24  -4    1.53    1.66
   3  25   5    3.49    2.82
   3  25   5    3.45    1.91
  25   3  -5   90.96    5.72
  -3 -25  -5    3.37    2.85
  -3 -25  -5    2.30    1.98
   2  26   6    5.29    3.07
   2  26   6    6.46    2.48
  26   2  -6    4.00    3.32
  -2 -26  -6    5.77    3.14
  -2 -26  -6    3.37    2.41
   1  27   7    9.41    2.96
  27   1  -7    7.45    3.45
  -1 -27  -7    7.16    3.43
  -1 -27  -7    7.61    4.45
   0  28   8   -1.18    4.89
  28   0  -8   -3.95    3.18
   0 -28  -8    2.77    3.60
  18  12  -9   44.44    5.52
  17  13  -8   13.52    4.05
  16  14  -7    0.74    2.94
  15  15  -6   20.90    3.54
  14  16  -5    1.22    2.53
  13  17  -4   47.90    4.66
  12  18  -3   10.31    2.91
  18  12   3    0.42    1.92
  11  19  -2   48.67    4.32
  19  11   2  601.52    8.11
  10  20  -1   52.37    4.32
  20  10   1  113.33    4.29
   9  21   0    0.99    2.11
  21   9   0    3.68    2.10
   8  22   1  420.35    8.19
  22   8  -1   45.72    3.78
   7  23   2  101.48    5.03
  23   7  -2   46.31    3.67
   6  24   3   87.80    5.00
  24   6  -3   18.92    2.91
  -6 -24  -3   92.65    5.05
   5  25   4   37.04    4.39
  25   5  -4   19.45    3.46
  -5 -25  -4   37.42    4.44
   4  26   5    7.51    2.79
  26   4  -5   53.36    4.86
  -4 -26  -5    4.98    2.72
   3  27   6   86.47    5.73
  27   3  -6   30.33    4.17
  -3 -27  -6   84.77    5.71
   2  28   7   22.48    4.03
  28   2  -7   15.32    4.19
  -2 -28  -7   25.02    4.17
  29   1  -8    5.31    4.19
  18  14  -8    7.97    4.03
  17  15  -7    5.61    3.34
  16  16  -6    0.78    2.85
  15  17  -5    1.85    2.69
  14  18  -4   73.21    4.90
  13  19  -3  148.32    5.87
  19  13   3   -0.10    2.00
  12  20  -2    2.62    2.41
  20  12   2  177.97    5.23
  11  21  -1   65.64    4.36
  21  11   1    3.85    2.18
  10  22   0   85.10    5.02
  22  10   0   76.68    4.25
   9  23   1    3.22    2.73
  23   9  -1   34.73    3.83
   8  24   2  190.00    6.40
  24   8  -2   21.77    3.24
   7  25   3    6.63    2.87
  25   7  -3    8.64    2.94
   6  26   4   50.92    4.79
  26   6  -4   10.17    3.25
  -6 -26  -4   48.44    4.79
   5  27   5   57.93    5.21
  27   5  -5   -1.79    3.14
  -5 -27  -5   62.76    5.29
   4  28   6   61.84    5.63
  28   4  -6    4.22    3.69
  -4 -28  -6   59.97    5.62
   3  29   7   64.00    5.87
  29   3  -7    1.93    3.45
  -3 -29  -7   60.17    5.30
  30   2  -8    1.54    3.78
  19  15  -8   11.81    4.38
  18  16  -7    3.06    3.71
  17  17  -6    3.70    3.13
  16  18  -5   79.04    5.52
  15  19  -4   -0.10    2.92
  14  20  -3  146.30    6.46
  13  21  -2    0.31    2.50
  21  13   2    4.60    2.36
  12  22  -1   17.42    3.38
  22  12   1   90.89    4.57
  11  23   0   28.29    3.44
  23  11   0   41.67    3.99
  10  24   1   -2.46    2.60
  24  10  -1   -3.10    2.02
   9  25   2   28.38    3.47
  25   9  -2  296.93    7.62
   8  26   3    3.11    2.99
  26   8  -3    1.82    2.95
   7  27   4    7.94    3.14
  27   7  -4   61.59    5.56
  -7 -27  -4    8.45    3.04
   6  28   5   34.20    4.14
  28   6  -5    7.00    3.61
  -6 -28  -5   41.57    5.12
   5  29   6    4.19    3.54
  29   5  -6   15.38    3.90
  -5 -29  -6    3.22    3.55
   4  30   7   20.82    4.87
  30   4  -7   61.62    7.03
  19  17  -7    3.70    3.54
  18  18  -6    7.87    3.54
  17  19  -5   10.46    3.44
  16  20  -4   93.78    5.73
  15  21  -3   27.26    4.11
  14  22  -2   -0.43    2.63
  22  14   2   31.36    3.36
  13  23  -1   14.81    3.15
  23  13   1    1.24    2.43
  12  24   0    1.08    2.66
  24  12   0  156.70    5.85
  11  25   1   32.06    4.01
  25  11  -1   15.33    3.18
  10  26   2   -1.49    2.85
  26  10  -2    5.29    3.00
   9  27   3   57.59    5.20
  27   9  -3  195.90    7.26
   8  28   4  200.75    7.36
  28   8  -4    9.82    3.64
   7  29   5    0.48    3.19
  29   7  -5   15.66    4.14
  -7 -29  -5    4.05    3.28
   6  30   6    3.62    3.63
  30   6  -6   -1.06    3.69
  -6 -30  -6    8.05    3.77
  31   5  -7    8.04    4.53
  20  18  -7   12.98    4.10
  19  19  -6   45.91    5.71
  18  20  -5    7.28    3.93
  17  21  -4   37.58    4.44
  16  22  -3    2.81    3.05
  15  23  -2    6.76    3.44
  14  24  -1   21.10    3.92
  24  14   1    0.26    2.63
  13  25   0    0.69    2.79
  25  13   0   19.25    3.34
  12  26   1    6.87    3.30
  26  12  -1   10.63    3.21
  11  27   2  165.91    6.51
  27  11  -2   71.64    5.49
  10  28   3   68.76    5.72
  28  10  -3  158.62    7.09
   9  29   4  152.57    6.96
  29   9  -4    5.43    3.63
   8  30   5  113.95    6.71
  30   8  -5   96.49    6.43
   7  31   6    4.01    4.18
  31   7  -6   11.52    4.51
  20  20  -6    2.60    3.65
  19  21  -5    7.80    3.70
  18  22  -4   -0.37    3.20
  17  23  -3  138.13    7.33
  16  24  -2   60.85    6.03
  15  25  -1    1.09    2.95
  25  15   1    6.24    3.07
  14  26   0   41.19    4.67
  26  14   0   17.20    3.50
  13  27   1   60.95    5.16
  27  13  -1  136.61    6.39
  12  28   2    6.80    3.46
  28  12  -2    6.78    3.08
  11  29   3  121.22    6.66
  29  11  -3   12.38    3.89
  10  30   4   -0.25    3.40
  30  10  -4   34.62    4.78
   9  31   5   20.75    4.38
  31   9  -5    8.80    4.18
  21  21  -6   13.06    4.77
  20  22  -5    5.99    3.83
  19  23  -4   -0.11    3.44
  18  24  -3    6.61    3.57
  17  25  -2    3.05    3.77
  16  26  -1   43.25    5.01
  15  27   0    0.02    3.58
  27  15   0    8.22    3.21
  14  28   1  107.75    6.84
  28  14  -1    9.07    3.58
  13  29   2    8.94    3.88
  29  13  -2   16.82    3.97
  12  30   3   18.58    4.26
  30  12  -3    2.51    3.68
  11  31   4    5.11    3.86
  31  11  -4    6.49    3.99
  32  10  -5   66.09    7.07
  21  23  -5    7.14    4.54
  20  24  -4   20.54    4.40
  19  25  -3  112.17    7.63
  18  26  -2   27.63    4.85
  17  27  -1  110.23    6.60
  16  28   0   62.52    6.43
  28  16   0    2.13    3.74
  15  29   1    1.17    3.31
  29  15  -1    0.74    3.45
  14  30   2   10.31    4.03
  30  14  -2   48.54    5.22
  13  31   3    9.35    3.69
  31  13  -3    7.23    3.95
  12  32   4   35.04    5.13
  32  12  -4   19.73    4.80
  20  26  -3    8.15    4.01
  19  27  -2   88.78    6.70
  18  28  -1   36.20    5.26
  17  29   0   -1.34    3.95
  16  30   1   66.17    6.72
  30  16  -1   24.28    4.38
  15  31   2    1.74    3.84
  31  15  -2   23.97    4.64
  19  29  -1    1.42    3.78
  18  30   0    2.53    4.29
   4  -3 -11   14.55    4.28
   3  -4 -11   20.39    4.53
   3  -2 -10    3.92    2.61
   3  -2 -10    4.29    3.14
   2  -3 -10   18.12    3.24
   2  -3 -10   18.73    3.69
   2  -1  -9   44.02    3.92
   2  -1  -9   47.45    4.56
   1  -2  -9  163.61    5.58
   1  -2  -9  179.03    6.63
  -1   2   9  198.65    7.23
  -2   1   9   54.51    4.70
   1   0  -8   34.97    3.24
   1   0  -8   37.20    3.83
   0  -1  -8   34.37    3.20
   0  -1  -8   42.88    4.32
   0   1   8   48.22    4.52
  -1   0   8   43.01    4.43
   0   1  -7   11.94    1.97
   0   1  -7   10.85    2.56
  -1   0  -7   10.71    1.84
  -1   0  -7   11.38    2.32
   1   0   7   11.86    2.37
   0  -1   7   14.15    2.57
  -1   2  -6  246.83    4.79
  -1   2  -6  289.36    6.14
  -2   1  -6   47.38    2.63
  -2   1  -6   53.57    3.18
   2  -1   6   59.50    3.66
   1  -2   6  308.19    6.30
  -2   3  -5  119.19    3.06
  -2   3  -5  134.01    3.85
  -3   2  -5  101.08    2.76
  -3   2  -5  104.75    3.46
   3  -2   5  118.19    3.89
   2  -3   5  145.15    3.98
  -3   4  -4    3.02    0.88
  -3   4  -4    3.20    1.12
  -4   3  -4  181.37    2.99
  -4   3  -4  204.18    4.09
   4  -3   4  222.80    4.33
   3  -4   4    4.35    1.28
  -4   5  -3  335.56    3.49
  -4   5  -3  353.47    4.56
  -5   4  -3    6.59    0.81
  -5   4  -3    7.52    1.12
   5  -4   3    7.22    1.11
   4  -5   3  401.31    4.83
  -5   6  -2  434.87    3.27
  -5   6  -2  422.47    4.32
  -5   6  -2  495.36    4.53
  -6   5  -2  662.65    3.35
  -6   5  -2  633.96    5.12
  -6   5  -2  719.39    5.56
   6  -5   2  707.83    5.61
   5  -6   2  485.06    4.51
  -6   7  -1  924.47    4.49
  -6   7  -1  597.87    4.61
  -7   6  -1  185.94    2.54
   7  -6   1  273.76    2.08
   6  -7   1  883.78    4.38
  -7   8   0   25.20    1.07
  -8   7   0   28.93    1.12
   8  -7   0   86.74    1.61
   7  -8   0   83.08    1.65
  -8   9   1 1170.63    7.19
  -9   8   1  371.07    3.99
   9  -8  -1  534.63    4.75
   9  -8  -1  388.24    4.09
   8  -9  -1 1792.00    8.72
   8  -9  -1 1264.18    7.49
  -9  10   2  323.60    4.42
 -10   9   2  227.48    3.70
  10  -9  -2  243.31    3.90
  10  -9  -2  235.99    3.77
   9 -10  -2  358.18    4.64
   9 -10  -2  335.68    4.51
 -10  11   3  240.45    4.48
 -11  10   3    7.09    1.28
  11 -10  -3    5.90    1.36
  11 -10  -3    6.11    1.27
  10 -11  -3  240.92    4.41
  10 -11  -3  246.47    4.55
 -11  12   4    6.64    1.69
 -12  11   4  168.50    4.39
  12 -11  -4  158.66    4.28
  12 -11  -4  177.66    4.50
  11 -12  -4    7.38    1.57
  11 -12  -4    9.12    1.79
 -12  13   5  112.19    4.15
 -13  12   5   25.62    2.73
  13 -12  -5   23.75    2.63
  13 -12  -5   24.54    3.07
  12 -13  -5  104.22    3.96
  12 -13  -5  114.28    4.20
 -13  14   6    7.35    2.43
 -14  13   6   25.56    3.06
  14 -13  -6   27.49    3.13
  14 -13  -6   30.07    3.73
  13 -14  -6    5.14    2.22
  13 -14  -6    6.81    2.24
 -14  15   7  314.90    7.65
 -14  15   7  306.80    7.44
 -15  14   7    3.38    2.41
 -15  14   7    1.06    2.26
  15 -14  -7    0.40    2.17
  15 -14  -7    1.73    2.38
  14 -15  -7  306.55    7.60
  14 -15  -7  327.35    7.80
 -15  16   8    7.46    3.04
 -15  16   8    6.34    2.85
 -16  15   8    2.23    2.75
 -16  15   8    0.25    2.64
  16 -15  -8    0.58    2.83
  16 -15  -8    0.72    2.69
  15 -16  -8    6.61    3.07
  15 -16  -8    7.93    3.01
 -16  17   9    3.64    3.28
 -17  16   9   -0.78    3.09
  17 -16  -9    3.83    3.35
  17 -16  -9    1.71    3.49
  16 -17  -9    0.38    2.87
  16 -17  -9   -0.20    3.07
 -17  18  10   14.20    4.51
 -18  17  10    1.67    3.61
  18 -17 -10   -0.35    3.57
  18 -17 -10    2.14    3.58
  17 -18 -10   11.77    4.11
  17 -18 -10   13.72    4.52
   5  -2 -11   17.28    5.63
   5  -2 -11   16.12    4.07
   2  -5 -11    1.41    3.72
   4  -1 -10   11.52    3.04
   4  -1 -10   10.54    3.44
   1  -4 -10  103.55    6.11
   3   0  -9   34.20    3.76
   3   0  -9   46.62    4.57
   0  -3  -9   37.92    3.70
   0  -3  -9   46.82    4.51
   0   3   9   48.32    4.66
  -3   0   9   48.99    5.12
   2   1  -8    9.67    2.28
   2   1  -8    9.34    2.60
  -1  -2  -8   18.01    2.48
  -1  -2  -8   17.50    2.89
   1   2   8   17.91    2.92
  -2  -1   8    9.29    2.56
   1   2  -7  136.14    4.31
   1   2  -7  153.52    5.13
  -2  -1  -7  112.57    3.80
  -2  -1  -7  125.24    4.71
   2   1   7  129.90    5.19
  -1  -2   7  174.72    5.60
   0   3  -6  253.24    4.99
   0   3  -6  294.40    6.08
  -3   0  -6  271.99    4.76
  -3   0  -6  291.13    5.95
   3   0   6  317.19    6.32
   0  -3   6  318.04    6.34
  -1   4  -5  443.76    5.71
  -1   4  -5  502.27    7.04
  -4   1  -5  447.96    5.22
  -4   1  -5  479.02    6.76
   4  -1   5  535.74    7.30
   1  -4   5  538.33    7.12
  -2   5  -4  419.48    4.88
  -2   5  -4  473.37    6.04
  -5   2  -4  142.68    2.57
  -5   2  -4  150.81    3.56
   5  -2   4  168.67    3.94
   2  -5   4  512.62    6.14
  -3   6  -3  143.81    2.58
  -3   6  -3  152.39    3.15
  -6   3  -3   30.55    1.06
  -6   3  -3   34.29    1.76
   6  -3   3   35.44    2.01
   3  -6   3  165.84    3.17
  -4   7  -2  108.30    1.96
  -4   7  -2  106.46    2.34
  -4   7  -2  130.44    2.37
  -7   4  -2  884.97    3.47
  -7   4  -2  855.73    5.79
  -7   4  -2  885.63    6.32
   7  -4   2  890.43    6.41
   4  -7   2  123.61    2.37
  -5   8  -1    7.83    0.79
  -5   8  -1    4.50    0.71
  -8   5  -1  251.04    2.80
   8  -5   1  370.71    1.99
   5  -8   1    7.70    0.78
  -6   9   0   48.87    1.48
  -9   6   0  351.66    3.28
   9  -6   0 1047.87    5.14
   6  -9   0  147.01    2.35
  -7  10   1   82.35    2.09
 -10   7   1  160.81    2.64
  10  -7  -1  206.24    3.02
  10  -7  -1  166.52    2.71
   7 -10  -1  129.21    2.55
   7 -10  -1   84.84    2.14
  -8  11   2   34.12    1.87
 -11   8   2   41.09    1.79
  11  -8  -2   39.87    1.82
  11  -8  -2   40.89    1.91
   8 -11  -2   41.35    1.90
   8 -11  -2   36.47    1.93
  -9  12   3   14.15    1.65
 -12   9   3  604.62    6.68
  12  -9  -3  579.72    6.69
  12  -9  -3  606.18    6.70
   9 -12  -3   13.89    1.69
   9 -12  -3   13.40    1.67
 -10  13   4   37.82    2.56
 -13  10   4  196.01    4.64
  13 -10  -4  187.55    4.49
  13 -10  -4  207.84    4.64
  10 -13  -4   41.60    2.57
  10 -13  -4   39.26    2.62
 -11  14   5    9.22    2.00
 -14  11   5  105.18    4.00
  14 -11  -5   92.72    3.84
  14 -11  -5  102.03    3.98
  11 -14  -5   11.53    2.20
  11 -14  -5    9.78    2.04
 -12  15   6   32.22    3.34
 -15  12   6   53.28    4.04
  15 -12  -6   42.36    3.46
  15 -12  -6   48.37    4.02
  12 -15  -6   28.15    3.11
  12 -15  -6   32.51    3.36
 -13  16   7    3.29    2.45
 -13  16   7    4.18    2.46
 -16  13   7   59.99    4.35
  16 -13  -7   58.09    4.20
  16 -13  -7   71.35    4.56
  13 -16  -7    3.05    2.30
  13 -16  -7    5.37    2.56
 -14  17   8    1.43    2.75
 -14  17   8    2.46    2.80
 -17  14   8   90.68    5.91
 -17  14   8   78.24    5.37
  17 -14  -8   78.70    5.05
  17 -14  -8   93.30    5.92
  14 -17  -8    2.85    2.92
  14 -17  -8    3.59    2.80
 -15  18   9   83.36    6.52
 -18  15   9    5.10    3.33
  18 -15  -9    1.85    3.29
  18 -15  -9    7.07    3.41
  15 -18  -9   77.13    6.02
  15 -18  -9   80.35    5.90
 -16  19  10   25.19    4.53
 -19  16  10   17.39    4.71
  19 -16 -10   15.23    3.86
  19 -16 -10   22.41    4.76
  16 -19 -10   25.63    4.65
  16 -19 -10   26.23    4.52
   6  -1 -11    9.10    3.32
   6  -1 -11    7.01    4.08
   1  -6 -11    7.63    4.11
   5   0 -10   -1.84    2.45
   5   0 -10    2.27    3.41
   0  -5 -10    2.35    2.99
   4   1  -9    3.74    2.48
   4   1  -9   -0.15    2.66
  -1  -4  -9  360.30    7.43
  -1  -4  -9  372.81    8.81
   1   4   9  416.74    9.33
  -4  -1   9    3.32    2.92
   3   2  -8   35.84    3.41
   3   2  -8   42.23    3.99
  -2  -3  -8    5.87    2.05
  -2  -3  -8    1.97    2.32
   2   3   8    5.70    2.70
  -3  -2   8   41.04    3.91
   2   3  -7   26.50    2.57
   2   3  -7   35.81    3.37
  -3  -2  -7   31.05    2.59
  -3  -2  -7   36.20    3.62
   3   2   7   43.02    3.64
  -2  -3   7   41.05    3.76
   1   4  -6  157.97    4.21
   1   4  -6  178.17    5.11
  -4  -1  -6   58.07    2.66
  -4  -1  -6   56.57    3.18
   4   1   6   66.89    3.58
  -1  -4   6  186.67    4.91
   0   5  -5   77.32    2.73
   0   5  -5   86.46    3.33
  -5   0  -5   84.45    2.50
  -5   0  -5   87.63    3.20
   5   0   5   96.20    3.74
   0  -5   5   94.13    3.32
  -1   6  -4  197.32    3.65
  -1   6  -4  223.37    4.33
  -6   1  -4   54.54    1.70
  -6   1  -4   56.10    2.33
   6  -1   4   64.55    2.69
   1  -6   4  245.89    4.36
  -2   7  -3  350.46    4.18
  -2   7  -3  378.78    4.92
  -7   2  -3   58.36    1.26
  -7   2  -3   57.70    2.03
   7  -2   3   63.11    2.31
   2  -7   3  422.76    4.76
  -3   8  -2    1.12    0.67
  -3   8  -2    0.80    0.76
  -3   8  -2    0.53    0.59
  -8   3  -2   16.88    1.12
   8  -3   2   17.84    1.51
   3  -8   2    0.73    0.65
  -4   9  -1  211.68    2.85
  -4   9  -1  137.19    2.48
  -4   9  -1  174.59    2.28
  -9   4  -1  785.39    4.64
   9  -4   1 1073.45    4.53
  -5  10   0  188.06    2.84
 -10   5   0  199.92    2.40
  10  -5   0  551.15    3.80
   5 -10   0  526.48    4.60
  -6  11   1    5.82    0.92
 -11   6   1  402.92    3.97
  11  -6  -1  520.48    4.73
  11  -6  -1  406.65    4.00
   6 -11  -1   10.11    1.15
   6 -11  -1    5.55    0.88
  -7  12   2   39.15    1.87
 -12   7   2    1.64    0.77
  12  -7  -2    2.00    0.94
  12  -7  -2    1.07    0.78
   7 -12  -2   45.39    2.03
   7 -12  -2   37.19    1.97
  -8  13   3    2.81    1.26
 -13   8   3   95.86    2.90
  13  -8  -3   89.11    3.06
  13  -8  -3  100.63    2.97
   8 -13  -3    0.60    1.08
   8 -13  -3    3.32    1.20
  -9  14   4  148.57    4.27
 -14   9   4    5.97    1.50
  14  -9  -4    5.82    1.54
  14  -9  -4    6.82    1.67
   9 -14  -4  150.46    4.11
   9 -14  -4  142.75    4.24
 -10  15   5   34.97    2.98
 -15  10   5    3.40    1.70
  15 -10  -5    4.03    1.74
  15 -10  -5    4.82    1.79
  10 -15  -5   36.12    2.90
  10 -15  -5   36.53    3.03
 -11  16   6    0.38    1.99
 -11  16   6    1.15    2.01
 -16  11   6   46.41    3.93
  16 -11  -6   40.18    3.76
  16 -11  -6   48.00    4.00
  11 -16  -6    0.57    2.08
  11 -16  -6    0.39    1.98
 -12  17   7   22.06    3.43
 -12  17   7   18.10    2.81
 -17  12   7   24.67    3.45
  17 -12  -7   16.86    2.89
  17 -12  -7   20.58    3.40
  12 -17  -7   17.17    2.87
  12 -17  -7   22.48    3.47
 -13  18   8  237.18    7.55
 -13  18   8  246.94    7.71
 -18  13   8    3.70    2.80
 -18  13   8    3.03    2.69
  18 -13  -8    2.31    2.91
  18 -13  -8    4.42    2.84
  13 -18  -8  236.05    7.55
  13 -18  -8  247.43    7.65
 -14  19   9    0.48    3.46
 -19  14   9   15.79    4.06
  19 -14  -9   14.07    3.88
  19 -14  -9   13.46    3.99
  14 -19  -9    0.45    2.88
  14 -19  -9    0.22    3.03
 -15  20  10   22.06    4.42
 -20  15  10    2.76    4.15
  20 -15 -10   -3.34    3.59
  20 -15 -10    1.54    3.99
  15 -20 -10   20.91    4.32
  15 -20 -10   23.13    4.39
   7   0 -11    1.37    3.15
   7   0 -11    4.49    4.00
   0  -7 -11    6.42    3.99
   6   1 -10  109.85    5.82
   6   1 -10  130.38    7.17
  -1  -6 -10   19.56    3.95
   5   2  -9    4.13    2.53
   5   2  -9    4.76    2.85
  -2  -5  -9    5.99    3.02
   2   5   9    7.85    2.89
  -5  -2   9    7.39    3.12
   4   3  -8   98.69    4.53
   4   3  -8  122.58    5.71
  -3  -4  -8   61.07    3.72
  -3  -4  -8   64.54    4.34
   3   4   8   70.78    5.10
  -4  -3   8  123.81    5.51
   3   4  -7  367.54    6.78
   3   4  -7  426.33    8.16
  -4  -3  -7  215.81    4.79
  -4  -3  -7  224.28    5.89
   4   3   7  246.24    6.61
  -3  -4   7  448.10    7.89
   2   5  -6  128.67    4.03
   2   5  -6  145.43    4.61
  -5  -2  -6    1.56    1.24
  -5  -2  -6    1.45    1.54
   5   2   6    0.71    1.67
  -2  -5   6  159.15    4.76
   1   6  -5  133.65    3.66
   1   6  -5  149.87    4.16
  -6  -1  -5   94.94    2.57
  -6  -1  -5   95.73    3.28
   6   1   5  110.75    3.77
  -1  -6   5  166.25    4.25
   0   7  -4  435.69    5.54
   0   7  -4  488.11    6.35
  -7   0  -4  494.61    4.31
  -7   0  -4  484.69    5.82
   7   0   4  525.29    6.55
   0  -7   4  518.69    6.03
  -1   8  -3   52.67    2.02
  -1   8  -3   60.10    2.23
  -1   8  -3   70.44    2.58
  -8   1  -3   20.44    0.90
  -8   1  -3   20.42    1.45
   8  -1   3   29.16    2.02
   1  -8   3   67.90    2.14
  -2   9  -2    3.51    0.85
  -2   9  -2    3.14    0.84
  -2   9  -2    5.02    0.74
  -9   2  -2   51.29    1.53
   9  -2   2   50.90    2.04
   2  -9   2    4.46    0.75
  -3  10  -1  195.82    3.06
  -3  10  -1  125.28    2.49
  -3  10  -1  176.19    2.20
 -10   3  -1   96.99    1.64
  10  -3   1  130.34    1.38
  -4  11   0  382.35    4.25
  -4  11   0  150.84    2.72
 -11   4   0    9.23    0.71
  11  -4   0   27.14    1.11
   4 -11   0  382.36    4.25
  -5  12   1   35.51    1.66
 -12   5   1   50.56    1.54
  12  -5  -1   63.78    1.93
  12  -5  -1   51.25    1.57
   5 -12  -1   65.28    2.14
   5 -12  -1   37.80    1.65
  -6  13   2    2.98    0.93
 -13   6   2   72.58    2.20
  13  -6  -2   74.70    2.40
  13  -6  -2   73.50    2.25
   6 -13  -2    2.21    1.00
   6 -13  -2    3.15    1.03
  -7  14   3  238.34    4.54
 -14   7   3  110.31    3.15
  14  -7  -3  107.64    3.23
  14  -7  -3  120.57    3.28
   7 -14  -3  259.45    4.84
   7 -14  -3  240.56    4.56
  -8  15   4    0.89    1.37
 -15   8   4  218.88    4.69
  15  -8  -4  204.87    4.79
  15  -8  -4  228.46    4.91
   8 -15  -4    0.84    1.37
   8 -15  -4    1.20    1.42
  -9  16   5  398.80    7.25
 -16   9   5  191.06    5.00
  16  -9  -5  174.80    5.00
  16  -9  -5  187.39    4.99
   9 -16  -5  403.30    7.03
   9 -16  -5  409.33    7.36
 -10  17   6    9.13    2.36
 -10  17   6   10.51    2.40
 -17  10   6   33.46    3.35
  17 -10  -6   29.62    3.64
  17 -10  -6   34.13    3.39
  10 -17  -6    8.33    2.25
  10 -17  -6    9.79    2.36
 -11  18   7   67.21    4.54
 -11  18   7   67.72    4.71
 -18  11   7    1.66    2.36
  18 -11  -7    4.50    2.65
  18 -11  -7    4.48    2.51
  11 -18  -7   65.97    4.34
  11 -18  -7   71.81    4.65
 -12  19   8    2.79    3.13
 -12  19   8    1.26    2.70
 -19  12   8    0.87    2.67
 -19  12   8    1.26    2.46
  19 -12  -8    1.70    2.92
  19 -12  -8    1.51    2.70
  12 -19  -8    5.95    2.73
  12 -19  -8    3.37    3.12
 -13  20   9  104.03    6.32
 -20  13   9   24.33    4.39
  20 -13  -9   23.27    3.93
  20 -13  -9   31.51    4.66
  13 -20  -9  107.23    6.48
  13 -20  -9  111.78    6.43
 -14  21  10   50.89    5.99
 -21  14  10   32.58    5.22
  21 -14 -10   32.33    4.65
  21 -14 -10   39.90    5.43
  14 -21 -10   52.96    6.20
  14 -21 -10   53.34    6.00
   8   1 -11    7.10    3.09
   8   1 -11   13.07    4.41
  -1  -8 -11    3.71    3.82
   7   2 -10   23.30    3.70
   7   2 -10   33.94    4.71
  -2  -7 -10    5.15    3.51
   6   3  -9   46.40    4.24
   6   3  -9   63.32    5.40
  -3  -6  -9   37.71    4.17
   3   6   9   39.82    4.35
  -6  -3   9   66.57    5.20
   5   4  -8   82.03    4.18
   5   4  -8   98.57    5.43
  -4  -5  -8  278.84    5.94
  -4  -5  -8  280.80    7.38
   4   5   8  301.84    7.65
  -5  -4   8   97.13    4.79
   4   5  -7  576.14    8.68
   4   5  -7  671.23    9.89
  -5  -4  -7   67.22    3.24
  -5  -4  -7   64.61    3.77
   5   4   7   78.59    4.66
  -4  -5   7  701.10    9.76
   3   6  -6    7.31    1.83
   3   6  -6    4.73    1.84
  -6  -3  -6  507.58    6.15
  -6  -3  -6  515.23    7.72
   6   3   6  561.22    8.37
  -3  -6   6    7.60    1.97
   2   7  -5    0.40    1.30
   2   7  -5    0.34    1.37
  -7  -2  -5  177.36    3.30
  -7  -2  -5  182.65    4.37
   7   2   5  201.36    4.99
  -2  -7   5    2.81    1.45
   1   8  -4  196.61    3.99
   1   8  -4  223.94    4.54
  -8  -1  -4   61.16    1.78
  -8  -1  -4   58.77    2.42
   8   1   4   64.86    2.79
  -1  -8   4  250.87    4.30
   0   9  -3   99.62    2.70
   0   9  -3  111.10    3.01
   0   9  -3  133.89    2.73
  -9   0  -3  119.81    1.75
  -9   0  -3  115.22    2.62
   9   0   3  121.03    3.17
   0  -9   3  124.62    2.66
  -1  10  -2  218.19    3.62
  -1  10  -2  207.85    3.49
  -1  10  -2  280.16    3.08
 -10   1  -2  376.39    3.58
  10  -1   2  353.75    2.17
  10  -1   2  336.18    4.40
   1 -10   2  250.68    2.95
  -2  11  -1  253.05    3.76
  -2  11  -1  168.64    2.94
  -2  11  -1  252.69    2.45
 -11   2  -1  552.07    3.49
  11  -2   1  723.47    3.75
  -3  12   0  204.14    3.41
  -3  12   0   82.34    2.22
 -12   3   0   41.56    1.09
  12  -3   0  110.13    2.06
   3 -12   0  207.85    3.44
  -4  13   1  204.71    3.40
 -13   4   1   47.82    1.49
  13  -4  -1   63.17    2.02
  13  -4  -1   49.71    1.50
   4 -13  -1  427.05    5.17
  -5  14   2  118.54    3.04
 -14   5   2  545.89    5.34
  14  -5  -2  561.72    6.12
  14  -5  -2  561.33    5.42
   5 -14  -2  156.49    3.62
   5 -14  -2  123.97    3.11
  -6  15   3   45.12    2.38
 -15   6   3   38.87    2.23
  15  -6  -3   35.46    2.27
  15  -6  -3   38.09    2.24
   6 -15  -3   54.93    2.79
   6 -15  -3   45.61    2.40
  -7  16   4  199.95    4.91
 -16   7   4  104.51    3.59
  16  -7  -4  106.38    3.90
  16  -7  -4  115.94    3.77
   7 -16  -4  218.52    4.95
   7 -16  -4  202.48    4.95
  -8  17   5   27.07    2.88
  -8  17   5   30.53    2.80
 -17   8   5 1054.57   10.95
  17  -8  -5  988.71   11.17
  17  -8  -5 1076.25   11.05
   8 -17  -5   31.12    2.92
   8 -17  -5   28.52    2.95
  -9  18   6    6.09    2.24
  -9  18   6    6.17    2.31
 -18   9   6   80.52    4.41
  18  -9  -6   79.08    4.55
  18  -9  -6   86.49    4.26
   9 -18  -6    5.21    2.18
   9 -18  -6    4.93    2.23
 -10  19   7   52.61    4.31
 -10  19   7   52.90    4.15
 -19  10   7  166.40    5.94
  19 -10  -7  154.46    5.85
  19 -10  -7  165.23    5.95
  10 -19  -7   50.03    4.11
  10 -19  -7   53.60    4.36
 -11  20   8    4.17    2.84
 -11  20   8    3.44    2.60
 -20  11   8    7.64    2.96
 -20  11   8    2.62    2.49
  20 -11  -8    4.82    2.81
  20 -11  -8    4.70    2.90
  11 -20  -8    0.69    2.90
  11 -20  -8    5.30    2.87
 -12  21   9    4.14    3.62
 -21  12   9    2.08    3.52
  21 -12  -9    0.04    3.34
  21 -12  -9    2.22    3.53
  12 -21  -9    4.99    3.50
  12 -21  -9    3.89    3.63
 -13  22  10   54.85    6.06
 -22  13  10   -1.28    3.90
  22 -13 -10   -1.69    3.27
  22 -13 -10    3.15    3.97
  13 -22 -10   57.96    6.29
  13 -22 -10   58.14    6.13
   9   2 -11   87.17    6.23
   9   2 -11  108.52    6.96
  -2  -9 -11    0.78    3.28
   8   3 -10   -1.60    2.68
   8   3 -10    0.35    3.42
  -3  -8 -10   18.53    4.05
   7   4  -9   20.84    3.22
   7   4  -9   23.43    3.65
  -4  -7  -9   25.30    3.53
   4   7   9   27.78    3.93
  -7  -4   9   28.55    3.83
   6   5  -8  132.83    5.30
   6   5  -8  157.68    6.27
  -5  -6  -8    2.68    2.48
   5   6   8    6.91    2.65
  -6  -5   8  166.66    5.98
   5   6  -7    4.20    1.89
   5   6  -7    6.73    2.29
  -6  -5  -7  278.57    5.37
  -6  -5  -7  283.20    6.64
   6   5   7  306.18    7.31
  -5  -6   7    9.85    2.39
   4   7  -6    0.95    1.49
   4   7  -6    0.89    1.69
  -7  -4  -6  105.40    3.22
  -7  -4  -6  112.43    4.14
   7   4   6  116.04    4.69
  -4  -7   6    3.52    1.72
   3   8  -5   33.33    2.42
   3   8  -5   37.95    2.92
  -8  -3  -5   96.76    2.67
  -8  -3  -5   97.26    3.45
   8   3   5  107.95    4.09
  -3  -8   5   37.68    2.60
   2   9  -4    5.11    1.29
   2   9  -4    4.67    1.35
  -9  -2  -4   33.94    1.57
  -9  -2  -4   33.18    2.05
   9   2   4   37.46    2.64
  -2  -9   4    6.67    1.30
   1  10  -3  221.71    4.17
   1  10  -3  235.74    4.13
   1  10  -3  287.16    3.75
 -10  -1  -3   10.46    0.98
 -10  -1  -3    5.73    1.01
  10   1   3    8.61    0.94
  10   1   3    7.45    1.42
  -1 -10   3  269.29    3.68
   0  11  -2  114.89    2.90
   0  11  -2  116.15    2.81
   0  11  -2  152.51    2.28
 -11   0  -2  139.72    2.22
  11   0   2  129.54    1.74
  11   0   2  121.29    2.83
   0 -11   2  131.33    2.14
  -1  12  -1    5.55    1.11
  -1  12  -1    4.96    0.99
  -1  12  -1    6.48    0.73
 -12   1  -1  174.42    1.88
 -12   1  -1  143.18    3.34
  12  -1   1  198.45    2.37
  -2  13   0  153.74    3.30
  -2  13   0   64.94    2.11
 -13   2   0   95.96    1.45
  13  -2   0  245.72    3.19
   2 -13   0  152.73    3.21
  -3  14   1  158.50    3.13
 -14   3   1  138.89    2.25
  14  -3  -1  174.95    3.19
  14  -3  -1  143.63    2.31
   3 -14  -1  343.62    4.85
  -4  15   2  459.75    5.65
 -15   4   2  185.98    3.24
  15  -4  -2  188.05    3.89
  15  -4  -2  187.70    3.26
   4 -15  -2  661.74    7.16
   4 -15  -2  481.79    5.79
  -5  16   3  188.63    4.17
 -16   5   3  112.29    3.14
  16  -5  -3  112.48    3.62
  16  -5  -3  115.84    3.27
   5 -16  -3  235.71    4.77
   5 -16  -3  195.63    4.25
  -6  17   4   90.43    3.51
 -17   6   4  151.69    4.10
  17  -6  -4  150.98    4.54
  17  -6  -4  158.13    4.21
   6 -17  -4   98.93    3.88
   6 -17  -4   97.46    3.61
  -7  18   5    6.76    1.95
  -7  18   5   13.08    2.23
 -18   7   5  304.05    6.23
  18  -7  -5  280.44    6.48
  18  -7  -5  305.12    6.27
   7 -18  -5    9.51    2.30
   7 -18  -5    7.51    2.05
  -8  19   6  313.59    7.34
  -8  19   6  350.33    7.40
 -19   8   6   58.37    4.04
  19  -8  -6   55.47    3.90
  19  -8  -6   58.04    3.79
   8 -19  -6  329.44    7.14
   8 -19  -6  329.19    7.51
  -9  20   7    3.56    2.53
  -9  20   7    5.56    2.58
 -20   9   7   73.86    4.56
  20  -9  -7   69.67    5.07
  20  -9  -7   78.58    5.06
   9 -20  -7    4.03    2.65
   9 -20  -7    4.43    2.57
 -10  21   8    9.40    3.11
 -10  21   8    9.45    2.83
 -21  10   8    1.90    3.08
 -21  10   8    1.17    2.58
  21 -10  -8   -0.44    3.00
  21 -10  -8    0.10    3.07
  10 -21  -8    9.06    2.94
  10 -21  -8    8.94    3.07
 -11  22   9    3.01    3.26
 -22  11   9   20.03    3.90
  22 -11  -9   20.53    4.20
  22 -11  -9   21.35    3.97
  11 -22  -9    3.51    3.41
  11 -22  -9    5.41    3.37
 -12  23  10    2.33    4.08
 -23  12  10    9.53    3.93
  23 -12 -10    9.60    3.80
  23 -12 -10   10.73    4.41
  12 -23 -10    0.98    3.61
  12 -23 -10    4.66    4.10
  10   3 -11   -2.37    3.12
  10   3 -11    1.62    3.97
  -3 -10 -11   -4.72    3.01
   9   4 -10   27.10    4.00
   9   4 -10   29.93    4.32
  -4  -9 -10    1.38    3.38
   8   5  -9   16.17    3.21
   8   5  -9   13.39    3.31
  -5  -8  -9   39.06    4.29
   5   8   9   44.76    4.69
  -8  -5   9   21.38    3.53
   7   6  -8   13.76    2.64
   7   6  -8   20.96    3.47
  -6  -7  -8  103.37    5.25
   6   7   8  112.81    5.47
  -7  -6   8   20.08    3.10
   6   7  -7   26.82    3.00
   6   7  -7   29.40    3.41
  -7  -6  -7   73.49    3.44
  -7  -6  -7   66.06    4.05
   7   6   7   81.64    4.84
  -6  -7   7   32.84    3.53
   5   8  -6   58.85    3.34
   5   8  -6   67.83    3.66
  -8  -5  -6  186.88    4.02
  -8  -5  -6  190.02    5.03
   8   5   6  201.75    5.51
  -5  -8   6   73.21    3.67
   4   9  -5    7.32    1.79
   4   9  -5    6.04    1.85
  -9  -4  -5  119.03    2.94
  -9  -4  -5  114.29    3.58
   9   4   5  124.29    4.32
  -4  -9   5    6.19    1.54
   3  10  -4   38.69    2.40
   3  10  -4   41.06    2.42
 -10  -3  -4  204.69    3.10
 -10  -3  -4  197.32    3.82
  10   3   4  206.66    4.61
  -3 -10   4   43.68    2.18
   2  11  -3   14.92    1.76
   2  11  -3   18.33    1.89
   2  11  -3   22.87    1.53
 -11  -2  -3  275.01    3.03
 -11  -2  -3  268.43    3.67
  11   2   3  272.60    3.01
  11   2   3  267.14    4.61
  -2 -11   3   21.97    1.55
   1  12  -2  327.87    4.93
   1  12  -2  324.45    4.49
   1  12  -2  450.00    3.58
 -12  -1  -2 1599.18    6.81
  12   1   2 1450.91    6.32
  -1 -12   2  368.12    3.26
   0  13  -1  348.09    5.00
   0  13  -1  252.83    3.74
   0  13  -1  435.78    2.66
 -13   0  -1  396.52    2.49
  13   0   1  402.10    3.74
  -1  14   0  358.34    5.02
  -1  14   0  165.32    3.12
 -14   1   0  239.47    2.02
  14  -1   0  574.36    5.14
   1 -14   0  362.08    5.04
  -2  15   1  107.59    3.06
  -2  15   1   44.38    1.88
 -15   2   1    2.54    0.60
  15  -2  -1    3.60    1.06
  15  -2  -1    2.23    0.61
   2 -15  -1  108.57    3.08
  -3  16   2  248.61    4.34
 -16   3   2  157.62    2.98
  16  -3  -2  160.17    3.79
  16  -3  -2  160.85    3.03
   3 -16  -2  386.16    5.72
   3 -16  -2  267.91    4.52
  -4  17   3  129.18    3.58
 -17   4   3  102.53    3.01
  17  -4  -3  104.89    3.68
  17  -4  -3  108.10    3.16
   4 -17  -3  164.55    4.23
   4 -17  -3  133.59    3.66
  -5  18   4   18.11    2.21
  -5  18   4   15.73    1.93
 -18   5   4   13.26    1.84
  18  -5  -4   11.24    1.97
  18  -5  -4   11.67    1.85
   5 -18  -4   21.16    2.53
   5 -18  -4   17.25    2.22
  -6  19   5  262.57    6.06
  -6  19   5  314.83    6.42
 -19   6   5  205.03    5.28
  19  -6  -5  192.09    5.50
  19  -6  -5  207.79    5.34
   6 -19  -5  283.72    6.27
   6 -19  -5  269.38    6.13
  -7  20   6   34.91    3.55
  -7  20   6   42.42    3.85
 -20   7   6  224.07    5.95
  20  -7  -6  210.48    6.23
  20  -7  -6  241.77    6.38
   7 -20  -6   39.78    3.98
   7 -20  -6   38.80    3.66
  -8  21   7    0.26    2.67
  -8  21   7   -0.49    2.27
 -21   8   7   17.51    3.24
  21  -8  -7   15.51    3.05
  21  -8  -7   14.41    3.20
   8 -21  -7    0.28    2.54
   8 -21  -7    1.88    2.71
  -9  22   8    5.34    2.94
  -9  22   8    3.02    2.82
 -22   9   8   34.97    4.16
 -22   9   8   37.15    4.07
  22  -9  -8   34.85    4.12
  22  -9  -8   42.94    4.65
   9 -22  -8    2.85    3.04
   9 -22  -8    1.07    2.74
 -10  23   9   -0.12    3.51
 -23  10   9    0.87    3.53
  23 -10  -9    1.01    3.49
  23 -10  -9    1.34    3.60
  10 -23  -9    1.63    3.34
  10 -23  -9   -0.11    3.48
 -11  24  10   17.56    4.28
 -24  11  10   10.83    4.26
  24 -11 -10   10.78    4.35
  24 -11 -10   11.03    4.29
  11 -24 -10   24.08    4.52
  11 -24 -10   19.97    4.29
  11   4 -11    2.53    3.26
  11   4 -11    3.81    3.75
  -4 -11 -11    0.98    3.33
   4  11  11   -0.36    3.32
  10   5 -10   -2.27    2.82
  10   5 -10   -0.49    3.52
  -5 -10 -10  116.34    6.28
   9   6  -9    7.23    2.97
   9   6  -9    9.11    3.50
  -6  -9  -9    4.99    3.05
   6   9   9    2.23    3.35
  -9  -6   9   13.22    3.28
   8   7  -8   -1.06    2.06
   8   7  -8    0.11    2.42
  -7  -8  -8  265.18    7.19
   7   8   8  287.53    7.66
  -8  -7   8    1.77    2.40
   7   8  -7   34.40    3.35
   7   8  -7   40.85    4.15
  -8  -7  -7    1.50    2.07
   8   7   7    1.86    2.20
  -7  -8   7   42.36    3.72
   6   9  -6    1.04    1.67
   6   9  -6   -2.07    1.84
  -9  -6  -6   57.94    2.87
  -9  -6  -6   56.94    3.38
   9   6   6   57.30    3.70
  -6  -9   6    2.74    1.75
   5  10  -5   35.84    3.01
   5  10  -5   40.08    2.84
 -10  -5  -5    3.45    1.25
 -10  -5  -5    4.11    1.44
  10   5   5    6.99    1.97
  -5 -10   5   38.01    2.71
   4  11  -4  117.45    3.75
   4  11  -4  129.60    3.82
 -11  -4  -4  224.42    3.39
 -11  -4  -4  216.58    3.96
  11   4   4  236.32    4.96
  -4 -11   4  142.20    3.31
   3  12  -3   61.10    2.76
   3  12  -3   64.26    2.66
 -12  -3  -3  257.10    3.58
  12   3   3  260.45    3.27
  12   3   3  250.54    4.56
  -3 -12   3   72.75    2.10
   2  13  -2   39.63    2.44
   2  13  -2   40.90    2.06
   2  13  -2   56.43    1.41
 -13  -2  -2  174.00    2.29
  13   2   2  165.18    2.59
  -2 -13   2   42.82    1.29
   1  14  -1  646.14    7.02
   1  14  -1  496.07    5.32
   1  14  -1  842.63    3.02
 -14  -1  -1  344.22    1.93
  14   1   1  335.55    3.81
   0  15   0   10.08    1.55
   0  15   0    3.11    0.96
 -15   0   0    4.65    0.45
  15   0   0    8.75    1.11
   0 -15   0    8.64    1.47
  -1  16   1    7.54    1.42
  -1  16   1    2.29    0.88
 -16   1   1   92.85    1.80
  16  -1  -1  119.28    3.10
  16  -1  -1   93.43    1.82
   1 -16  -1    7.90    1.46
  -2  17   2    9.66    1.35
 -17   2   2   86.92    2.32
  17  -2  -2   92.07    3.23
  17  -2  -2   90.37    2.41
   2 -17  -2   12.77    1.72
   2 -17  -2    9.31    1.42
  -3  18   3  104.03    3.43
  -3  18   3  147.14    3.61
 -18   3   3   10.03    1.46
  18  -3  -3   10.34    1.92
  18  -3  -3   11.03    1.48
   3 -18  -3  136.54    4.24
   3 -18  -3  109.95    3.55
  -4  19   4    2.05    1.59
  -4  19   4    4.74    1.64
 -19   4   4    1.50    1.48
  19  -4  -4    2.15    1.67
  19  -4  -4    2.48    1.54
   4 -19  -4    4.16    1.78
   4 -19  -4    3.88    1.71
  -5  20   5  607.54    8.99
  -5  20   5  741.64    9.43
 -20   5   5    2.68    1.86
  20  -5  -5    0.25    1.87
  20  -5  -5    4.41    1.97
   5 -20  -5  683.33    9.62
   5 -20  -5  615.93    9.05
  -6  21   6  189.66    5.89
  -6  21   6  219.51    6.18
 -21   6   6   70.96    4.33
  21  -6  -6   71.19    4.79
  21  -6  -6   76.81    4.44
   6 -21  -6  203.12    6.26
   6 -21  -6  185.46    5.83
  -7  22   7   25.28    3.34
  -7  22   7   23.77    3.31
 -22   7   7   87.75    5.15
  22  -7  -7   78.13    5.42
  22  -7  -7   86.28    5.19
   7 -22  -7   26.64    3.62
   7 -22  -7   25.72    3.38
  -8  23   8    7.11    3.00
  -8  23   8    9.83    3.20
 -23   8   8    3.88    3.15
 -23   8   8    3.79    2.78
  23  -8  -8    3.09    2.96
  23  -8  -8    5.58    3.30
   8 -23  -8    5.93    2.89
   8 -23  -8    6.93    2.98
  -9  24   9   18.67    4.29
 -24   9   9   94.44    6.78
  24  -9  -9   83.49    6.17
  24  -9  -9   96.85    6.83
   9 -24  -9   18.34    3.95
   9 -24  -9   16.01    4.19
 -10  25  10   20.73    4.81
 -25  10  10   83.98    7.33
  25 -10 -10   76.62    6.54
  25 -10 -10   94.98    7.50
  10 -25 -10   22.44    4.68
  10 -25 -10   19.83    4.72
  12   5 -11    8.16    3.74
  12   5 -11    7.39    4.44
  -5 -12 -11   17.51    4.50
   5  12  11   22.12    4.68
  11   6 -10   28.65    3.96
  11   6 -10   36.40    4.81
  -6 -11 -10    0.88    3.27
  10   7  -9   20.66    3.35
  10   7  -9   32.67    4.28
  -7 -10  -9   28.98    3.90
   7  10   9   27.21    6.21
 -10  -7   9   34.60    4.01
   9   8  -8    1.15    2.51
   9   8  -8   -2.35    2.66
  -8  -9  -8   55.02    4.47
   8   9   8   61.74    5.23
  -9  -8   8   -0.58    2.29
   8   9  -7   27.26    3.29
   8   9  -7   26.73    3.11
  -9  -8  -7   56.15    3.92
   9   8   7   65.37    4.75
  -8  -9   7   30.30    3.08
   7  10  -6    7.61    2.26
   7  10  -6    8.58    2.12
 -10  -7  -6   31.05    2.99
 -10  -7  -6   32.41    3.14
  10   7   6   30.56    3.24
  -7 -10   6   10.89    2.03
   6  11  -5  583.48    8.59
   6  11  -5  671.77    8.66
 -11  -6  -5   -0.22    1.19
 -11  -6  -5    0.40    1.37
  11   6   5   -1.31    1.78
  -6 -11   5  715.17    7.76
   5  12  -4  108.97    4.01
   5  12  -4  123.28    3.83
 -12  -5  -4   15.71    1.69
 -12  -5  -4   14.40    1.79
  12   5   4   14.30    1.65
  12   5   4   13.66    1.99
  -5 -12   4  136.68    3.21
   4  13  -3  172.09    4.37
   4  13  -3  194.48    4.11
 -13  -4  -3   14.00    1.38
  13   4   3   15.10    1.49
  13   4   3   13.53    1.69
  -4 -13   3  213.40    3.14
   3  14  -2    4.02    1.52
   3  14  -2    4.29    1.18
 -14  -3  -2  491.86    3.53
  14   3   2  477.34    4.64
  -3 -14   2    3.06    0.60
   2  15  -1   62.83    2.76
   2  15  -1   47.81    2.10
  15   2   1  459.87    4.82
   1  16   0   27.98    2.18
   1  16   0   14.31    1.53
   1  16   0   33.85    0.89
  16   1   0    9.83    1.30
   0  17   1  448.46    6.36
   0  17   1  201.86    3.75
   0  17   1  540.59    4.26
 -17   0   1  376.07    3.27
  17   0  -1  482.99    6.02
  17   0  -1  382.78    3.30
   0 -17  -1  463.19    6.46
  -1  18   2   11.61    1.91
  -1  18   2    6.25    1.25
  -1  18   2   13.37    1.35
 -18   1   2    1.55    0.88
  18  -1  -2    1.63    1.41
  18  -1  -2    1.71    0.91
   1 -18  -2   13.48    2.01
   1 -18  -2    8.39    1.41
  -2  19   3  253.01    5.00
  -2  19   3  384.57    5.50
 -19   2   3    5.10    1.30
  19  -2  -3    4.54    1.64
  19  -2  -3    6.08    1.37
   2 -19  -3  344.92    6.23
   2 -19  -3  256.67    4.99
  -3  20   4    9.22    1.92
  -3  20   4   13.93    1.94
 -20   3   4  106.32    3.61
  20  -3  -4  100.52    4.15
  20  -3  -4  107.38    3.66
   3 -20  -4   10.18    2.30
   3 -20  -4    9.49    1.98
  -4  21   5    1.10    1.91
  -4  21   5    0.37    1.77
 -21   4   5    9.08    2.03
  21  -4  -5    7.96    2.44
  21  -4  -5    7.33    2.08
   4 -21  -5    0.62    2.23
   4 -21  -5    0.76    1.90
  -5  22   6    8.07    2.36
  -5  22   6   10.07    2.53
 -22   5   6  108.08    4.83
  22  -5  -6   99.71    5.38
  22  -5  -6  106.35    4.90
   5 -22  -6   11.04    2.57
   5 -22  -6   10.02    2.46
  -6  23   7    3.56    2.80
  -6  23   7    3.70    2.51
 -23   6   7   86.08    5.12
  23  -6  -7   83.55    5.64
  23  -6  -7   96.39    5.34
   6 -23  -7    1.93    2.83
   6 -23  -7    1.70    2.72
  -7  24   8    1.48    3.13
  -7  24   8    0.37    2.85
 -24   7   8   11.22    3.44
 -24   7   8    9.70    3.01
  24  -7  -8   12.59    3.77
  24  -7  -8   15.80    3.71
   7 -24  -8   -1.14    3.08
   7 -24  -8    3.26    3.21
  -8  25   9   66.86    6.38
 -25   8   9   83.54    6.57
  25  -8  -9   73.65    6.72
  25  -8  -9   86.15    6.63
   8 -25  -9   68.82    5.63
   8 -25  -9   60.23    6.27
  12   7 -10   14.08    3.50
  12   7 -10   13.35    4.02
  -7 -12 -10   42.58    4.84
   7  12  10   46.85    4.98
  11   8  -9   -1.99    2.47
  11   8  -9   -0.65    3.05
  -8 -11  -9   26.68    3.85
 -11  -8   9    0.13    2.72
  10   9  -8   17.14    3.06
  10   9  -8   15.78    3.45
  -9 -10  -8   57.90    4.48
   9  10   8   65.27    5.30
 -10  -9   8   21.37    3.10
   9  10  -7   43.16    4.24
   9  10  -7   53.69    4.05
 -10  -9  -7  170.79    5.44
  10   9   7  187.26    6.36
  -9 -10   7   57.58    3.87
   8  11  -6    1.73    2.17
   8  11  -6    0.54    1.84
 -11  -8  -6   -0.67    1.63
  11   8   6    1.32    2.16
  -8 -11   6    1.16    1.72
   7  12  -5  404.27    7.44
   7  12  -5  467.75    7.31
 -12  -7  -5    4.28    1.45
 -12  -7  -5    4.55    1.55
  12   7   5    4.60    1.43
  12   7   5    3.71    1.91
  -7 -12   5  493.74    6.50
   6  13  -4   44.23    3.31
   6  13  -4   53.47    2.79
 -13  -6  -4  220.68    3.82
 -13  -6  -4  211.91    3.94
  13   6   4  217.29    3.78
  13   6   4  230.92    5.09
  -6 -13   4   55.00    2.38
   5  14  -3   47.38    3.15
   5  14  -3   50.86    2.63
 -14  -5  -3   11.35    1.33
  14   5   3   12.64    1.38
  14   5   3   11.34    1.67
  -5 -14   3   55.81    1.90
   4  15  -2   30.10    2.72
   4  15  -2   30.87    2.05
 -15  -4  -2   93.23    1.59
  15   4   2   97.29    2.58
  15   4   2   96.90    1.63
   3  16  -1   29.95    2.39
   3  16  -1   22.16    1.89
  16   3   1  106.33    2.75
   2  17   0  678.16    7.95
   2  17   0  362.93    4.84
  17   2   0  322.91    4.80
   1  18   1  262.30    5.34
   1  18   1  118.50    3.05
   1  18   1  311.10    3.23
 -18  -1   1   46.38    1.27
  18   1  -1   58.77    2.61
  18   1  -1   47.67    1.33
  -1 -18  -1  264.98    5.36
   0  19   2  276.35    5.68
   0  19   2  135.07    3.46
   0  19   2  312.77    4.20
 -19   0   2  266.69    3.66
  19   0  -2  274.15    5.29
  19   0  -2  276.48    3.72
   0 -19  -2  279.01    5.73
  -1  20   3    7.34    1.57
  -1  20   3   10.38    1.59
 -20   1   3  625.82    6.56
  20  -1  -3  609.91    8.44
  20  -1  -3  652.41    6.70
   1 -20  -3    9.66    2.18
   1 -20  -3    8.10    1.68
  -2  21   4    1.95    1.67
  -2  21   4    0.69    1.56
 -21   2   4    7.49    1.76
  21  -2  -4    6.48    2.34
  21  -2  -4    6.16    1.73
   2 -21  -4    2.67    2.14
   2 -21  -4    0.50    1.68
  -3  22   5   11.05    2.36
  -3  22   5    7.94    2.08
 -22   3   5  255.73    5.78
  22  -3  -5  245.45    6.77
  22  -3  -5  258.62    5.84
   3 -22  -5   10.88    2.45
   3 -22  -5    9.06    2.32
  -4  23   6   69.71    4.56
  -4  23   6   85.77    4.62
 -23   4   6   34.28    3.66
  23  -4  -6   37.22    4.51
  23  -4  -6   35.88    3.78
   4 -23  -6   73.49    4.90
   4 -23  -6   67.72    4.50
  -5  24   7    0.15    2.67
  -5  24   7   -0.42    2.40
 -24   5   7   81.58    5.07
  24  -5  -7   72.88    5.16
  24  -5  -7   83.97    5.18
   5 -24  -7    1.58    2.98
   5 -24  -7    1.04    2.67
  -6  25   8    4.40    2.90
  -6  25   8    2.94    2.88
 -25   6   8    5.96    3.24
 -25   6   8    4.54    2.88
  25  -6  -8    3.46    3.47
  25  -6  -8    5.68    3.28
   6 -25  -8    7.11    3.37
   6 -25  -8    1.59    2.75
  -7  26   9   36.65    4.81
 -26   7   9   22.09    4.34
  26  -7  -9   21.29    4.58
  26  -7  -9   24.83    4.47
   7 -26  -9   35.56    4.69
   7 -26  -9   36.38    4.75
  13   8 -10    3.03    3.07
  13   8 -10    3.64    3.82
  -8 -13 -10   -0.23    3.20
   8  13  10    0.89    3.31
  12   9  -9   -1.73    2.65
  12   9  -9   -2.30    3.13
  -9 -12  -9   29.44    3.89
   9  12   9   25.45    3.84
  11  10  -8   10.14    3.15
  11  10  -8   11.67    3.20
 -10 -11  -8    0.73    2.39
  10  11   8    0.65    2.42
  10  11   8   -1.36    2.86
  10  11  -7    4.79    2.65
  10  11  -7    3.89    2.59
 -11 -10  -7    4.79    2.26
  11  10   7    7.00    2.87
 -10 -11   7    4.15    2.14
   9  12  -6  255.95    6.73
   9  12  -6  320.89    7.02
 -12  -9  -6   10.21    2.10
  12   9   6    9.99    2.57
  -9 -12   6  323.71    6.15
   8  13  -5   75.52    4.04
   8  13  -5   79.96    3.88
 -13  -8  -5   73.34    3.68
 -13  -8  -5   68.02    3.13
  13   8   5   70.98    2.95
  13   8   5   75.53    3.93
  -8 -13   5   82.19    3.28
   7  14  -4  148.02    4.97
   7  14  -4  167.15    4.44
 -14  -7  -4   47.14    2.28
  14   7   4   46.02    2.52
  14   7   4   48.34    3.32
  -7 -14   4  177.22    3.53
   6  15  -3  160.20    4.69
   6  15  -3  182.91    4.27
 -15  -6  -3  331.66    3.82
  15   6   3  344.49    4.73
  15   6   3  329.59    3.82
  15   6   3  313.25    5.31
  -6 -15   3  187.71    2.82
   5  16  -2  231.99    5.28
   5  16  -2  232.96    4.34
 -16  -5  -2    4.80    0.61
  16   5   2    5.55    1.29
  16   5   2    4.96    0.62
   4  17  -1    8.74    1.80
   4  17  -1    7.73    1.34
  17   4   1   13.86    1.57
   3  18   0  157.66    4.37
   3  18   0   92.57    2.78
  18   3   0   45.80    2.49
   2  19   1  346.36    6.32
   2  19   1  157.11    3.54
   2  19   1  407.10    3.54
 -19  -2   1  112.56    1.69
  19   2  -1  154.50    4.10
  19   2  -1  118.76    1.73
  -2 -19  -1  351.99    6.34
   1  20   2   56.42    3.51
   1  20   2   27.93    2.05
   1  20   2   68.03    2.37
 -20  -1   2  226.73    3.35
  20   1  -2  242.60    5.23
  20   1  -2  232.96    3.41
  -1 -20  -2   57.66    3.55
   0  21   3  582.66    8.42
   0  21   3  370.88    6.09
   0  21   3  668.37    7.08
 -21   0   3  596.78    6.41
  21   0  -3  598.98    8.66
  21   0  -3  607.10    6.44
   0 -21  -3  597.70    8.54
   0 -21  -3  403.67    6.39
  -1  22   4   16.52    2.18
  -1  22   4   28.72    2.69
 -22   1   4   93.72    3.55
  22  -1  -4   92.99    4.35
  22  -1  -4   98.61    3.65
   1 -22  -4   26.95    3.18
   1 -22  -4   18.21    2.28
  -2  23   5   84.21    4.25
  -2  23   5  113.18    4.56
 -23   2   5    0.84    1.87
  23  -2  -5    2.47    2.27
  23  -2  -5    2.09    1.97
   2 -23  -5  111.48    5.17
   2 -23  -5   87.60    4.32
  -3  24   6    1.09    2.20
  -3  24   6    2.20    2.22
 -24   3   6   43.71    3.85
  24  -3  -6   40.40    4.24
  24  -3  -6   50.18    4.04
   3 -24  -6   -0.71    2.65
   3 -24  -6    2.13    2.25
  -4  25   7   21.81    3.55
  -4  25   7   30.42    3.60
 -25   4   7    8.26    2.83
  25  -4  -7    6.17    2.99
  25  -4  -7    8.16    2.84
   4 -25  -7   29.43    3.99
   4 -25  -7   22.51    3.53
  -5  26   8   19.40    3.82
  -5  26   8   22.25    3.78
 -26   5   8   16.40    3.58
 -26   5   8   15.37    3.42
  26  -5  -8   19.01    4.17
  26  -5  -8   17.12    3.70
   5 -26  -8   23.91    4.08
   5 -26  -8   21.43    3.87
  -6  27   9    6.36    3.65
 -27   6   9    0.62    3.32
  27  -6  -9   -3.19    3.70
  27  -6  -9    0.76    3.17
   6 -27  -9    4.48    3.88
   6 -27  -9    3.69    3.54
  14   9 -10   15.21    4.10
  14   9 -10   18.05    4.34
  13  10  -9   -0.76    3.19
  13  10  -9   -1.89    3.10
  10  13   9    0.00    3.04
  12  11  -8   -2.33    2.41
  12  11  -8   -0.29    2.85
 -11 -12  -8    0.33    2.72
  11  12   8    0.08    2.49
  11  12   8    1.35    2.97
  11  12  -7    0.57    2.63
  11  12  -7   -0.30    2.42
 -12 -11  -7   24.47    2.95
  12  11   7   25.53    3.02
  12  11   7   27.90    3.56
  10  13  -6   12.52    2.71
  10  13  -6   16.22    2.64
 -13 -10  -6   40.16    3.32
  13  10   6   36.63    3.28
  13  10   6   42.32    4.01
   9  14  -5    1.95    2.28
   9  14  -5    2.85    1.95
 -14  -9  -5    0.64    1.46
  14   9   5    1.08    1.48
  14   9   5    0.87    1.99
   8  15  -4   27.11    3.04
   8  15  -4   29.18    2.90
  15   8   4    2.63    1.47
  15   8   4    2.29    1.23
  15   8   4    1.69    1.72
   7  16  -3    8.67    2.25
   7  16  -3   11.41    1.75
  16   7   3  254.93    4.43
  16   7   3  238.41    3.29
   6  17  -2   15.52    2.27
   6  17  -2   18.02    2.15
  17   6   2  418.69    5.55
   5  18  -1  191.56    5.01
   5  18  -1  165.47    3.67
  18   5   1  206.58    4.20
   4  19   0   77.07    3.81
   4  19   0   49.88    2.45
  19   4   0  570.28    7.06
   3  20   1    3.57    2.03
   3  20   1    0.33    1.12
   3  20   1    2.26    0.74
  20   3  -1   58.22    3.15
   2  21   2   33.33    3.01
   2  21   2   16.03    1.99
   2  21   2   38.77    2.03
  21   2  -2    0.80    1.57
  21   2  -2    0.64    0.87
  -2 -21  -2   33.58    3.01
   1  22   3   20.80    2.63
   1  22   3   14.99    1.93
   1  22   3   28.89    2.49
 -22  -1   3  338.20    5.62
  22   1  -3  335.96    6.96
  22   1  -3  340.88    4.95
  -1 -22  -3   27.79    3.14
  -1 -22  -3   16.62    2.01
   0  23   4    7.45    1.92
   0  23   4   10.59    1.99
 -23   0   4    9.12    1.82
  23   0  -4   12.09    2.75
  23   0  -4    8.74    1.86
   0 -23  -4   10.63    2.66
   0 -23  -4   10.02    2.07
  -1  24   5   73.45    4.10
  -1  24   5  110.71    4.58
 -24   1   5   15.11    2.36
  24  -1  -5   13.88    2.86
  24  -1  -5   16.25    2.47
   1 -24  -5   98.03    4.80
   1 -24  -5   82.72    4.30
  -2  25   6    9.96    2.70
  -2  25   6   12.75    2.72
 -25   2   6   21.99    2.94
  25  -2  -6   19.71    3.31
  25  -2  -6   24.67    3.06
   2 -25  -6   15.28    3.29
   2 -25  -6    9.40    2.71
  -3  26   7  188.23    6.85
  -3  26   7  254.69    7.44
 -26   3   7    6.15    2.86
  26  -3  -7    5.86    3.08
  26  -3  -7    5.78    2.93
   3 -26  -7  219.94    7.54
   3 -26  -7  189.97    6.84
  -4  27   8   72.22    5.81
  -4  27   8   81.80    6.04
 -27   4   8   94.71    7.20
 -27   4   8   81.95    8.29
  27  -4  -8   81.01    6.74
  27  -4  -8   88.26    5.98
   4 -27  -8   72.28    6.10
   4 -27  -8   65.75    5.65
  -5  28   9    6.51    3.65
  28  -5  -9   11.43    4.01
  28  -5  -9   14.28    5.87
   5 -28  -9    7.23    4.01
   5 -28  -9    5.66    3.60
  15  10 -10   17.82    4.42
  15  10 -10   23.95    4.66
  14  11  -9   18.49    4.15
  14  11  -9   21.44    4.21
  13  12  -8    0.00    2.67
  13  12  -8   -0.02    2.55
  12  13   8    5.15    3.25
  12  13  -7    1.14    2.81
  12  13  -7   -1.31    2.52
  13  12   7    1.28    2.67
  11  14  -6    1.72    2.58
  11  14  -6    0.02    2.14
  14  11   6    9.51    2.62
  10  15  -5  560.50    9.80
  10  15  -5  654.52    8.96
  15  10   5   59.35    3.86
   9  16  -4    0.48    1.97
   9  16  -4    0.91    1.67
  16   9   4  243.73    4.75
  16   9   4  231.50    5.44
   8  17  -3  128.48    4.76
   8  17  -3  148.02    4.11
  17   8   3   38.34    2.60
   7  18  -2  101.72    4.27
   7  18  -2  109.02    3.40
  18   7   2   38.97    2.71
   6  19  -1    1.48    1.83
   6  19  -1    1.54    1.30
  19   6   1    1.68    1.53
   5  20   0   97.28    4.32
   5  20   0   63.68    2.75
  20   5   0   15.88    2.02
   4  21   1   78.20    4.13
   4  21   1   35.58    2.42
  21   4  -1   57.60    3.37
   3  22   2   18.63    2.54
   3  22   2    9.24    1.58
  22   3  -2    6.66    2.14
  -3 -22  -2   21.17    2.61
   2  23   3  110.16    4.88
   2  23   3   53.44    2.99
   2  23   3  120.59    4.64
  23   2  -3    1.11    2.14
  -2 -23  -3  113.91    4.94
   1  24   4    5.23    2.57
   1  24   4    5.97    1.85
   1  24   4    5.51    2.04
  24   1  -4   69.81    4.31
  -1 -24  -4    6.88    2.64
  -1 -24  -4    3.73    1.85
   0  25   5   57.74    3.81
   0  25   5   83.58    4.80
  25   0  -5   76.48    4.80
   0 -25  -5   71.62    4.55
   0 -25  -5   54.99    3.82
  -1  26   6   -0.91    2.26
  26  -1  -6   68.35    5.63
   1 -26  -6    0.78    2.94
   1 -26  -6    0.01    2.33
  -2  27   7   49.86    4.81
  27  -2  -7   48.27    5.07
   2 -27  -7   58.54    5.50
   2 -27  -7   49.00    4.77
  -3  28   8  185.01    7.48
  28  -3  -8   24.75    4.32
   3 -28  -8  234.36    8.42
   3 -28  -8  195.62    7.62
  29  -4  -9    4.77    4.20
   4 -29  -9    4.98    4.06
   4 -29  -9    4.91    3.61
  15  12  -9   17.80    4.27
  15  12  -9   23.92    4.29
  14  13  -8  105.74    6.13
  14  13  -8  128.26    6.28
  13  14   8   65.41    5.60
  13  14  -7    5.66    2.89
  13  14  -7    4.08    2.78
  14  13   7   77.34    5.15
  12  15  -6   44.69    4.30
  12  15  -6   46.59    4.02
  15  12   6    3.81    2.44
  11  16  -5   83.26    5.15
  11  16  -5   86.45    4.41
  16  11   5    5.88    2.25
  10  17  -4  324.26    7.49
  10  17  -4  374.79    6.50
  17  10   4  152.52    4.80
   9  18  -3   14.31    2.78
   9  18  -3   13.40    1.96
  18   9   3    0.92    1.63
   8  19  -2   81.43    4.48
   8  19  -2   78.81    3.14
  19   8   2   26.05    2.74
   7  20  -1   47.23    3.58
   7  20  -1   42.59    2.55
  20   7   1  111.89    3.82
   6  21   0   55.85    4.02
   6  21   0   37.44    2.52
  21   6   0  374.47    6.45
   5  22   1    0.25    2.22
   5  22   1   -0.01    1.31
  22   5  -1   48.54    3.46
   4  23   2    4.31    2.21
   4  23   2    0.13    1.34
  23   4  -2   88.53    4.39
  -4 -23  -2    5.18    2.17
   3  24   3   41.77    3.69
   3  24   3   22.89    2.37
  24   3  -3    8.05    2.58
  -3 -24  -3   47.13    3.81
   2  25   4  102.90    4.91
   2  25   4   59.62    3.39
  25   2  -4   87.80    5.17
  -2 -25  -4   99.47    4.87
  -2 -25  -4   61.73    3.54
   1  26   5    0.90    2.69
   1  26   5    1.59    1.90
  26   1  -5   39.48    4.84
  -1 -26  -5    0.97    2.80
  -1 -26  -5    1.79    2.00
   0  27   6   26.49    3.27
  27   0  -6   29.62    4.00
   0 -27  -6   27.83    3.65
   0 -27  -6   27.60    3.38
  -1  28   7    6.91    2.87
  28  -1  -7    9.00    3.78
   1 -28  -7    7.99    3.50
   1 -28  -7    3.88    2.79
  -2  29   8   -0.09    2.87
  29  -2  -8   11.74    3.86
   2 -29  -8   -2.58    3.42
   2 -29  -8   -0.33    2.81
  16  13  -9   26.01    4.43
  15  14  -8    1.20    3.42
  15  14  -8    2.81    3.12
  14  15   8   14.32    3.83
  14  15  -7    4.03    2.95
  14  15  -7    1.96    2.77
  15  14   7    1.32    2.81
  13  16  -6  110.73    6.13
  13  16  -6  127.98    5.29
  16  13   6   -2.08    2.28
  12  17  -5    0.85    2.44
  12  17  -5   -0.27    2.13
  17  12   5   44.63    3.93
  11  18  -4   15.50    2.92
  11  18  -4   19.65    2.44
  10  19  -3   20.81    3.23
  10  19  -3   22.67    2.74
  19  10   3   24.12    2.89
   9  20  -2   42.34    3.73
   9  20  -2   36.58    2.65
  20   9   2   24.25    3.03
   8  21  -1   50.86    4.24
   8  21  -1   42.36    2.65
  21   8   1    1.58    1.82
   7  22   0   76.37    4.21
   7  22   0   60.36    2.87
  22   7   0   44.88    3.38
   6  23   1    2.70    2.22
   6  23   1    4.29    1.59
  23   6  -1    7.25    2.24
   5  24   2  130.27    5.44
   5  24   2   58.61    3.02
  24   5  -2   -0.33    1.94
   4  25   3   -0.47    2.25
   4  25   3   -1.23    1.37
  25   4  -3    7.39    2.44
  -4 -25  -3    0.52    2.22
   3  26   4   91.57    4.90
   3  26   4   49.71    3.21
  26   3  -4  128.32    5.93
  -3 -26  -4   89.62    4.92
   2  27   5  153.85    6.05
   2  27   5  105.15    4.69
  27   2  -5  257.43    7.70
  -2 -27  -5  159.48    6.14
   1  28   6    7.06    3.35
   1  28   6    4.83    2.44
  28   1  -6   -1.74    2.88
  -1 -28  -6    4.33    3.29
  29   0  -7   33.75    4.85
   0 -29  -7   38.68    4.72
  30  -1  -8   51.80    6.01
   1 -30  -8    3.05    3.35
  17  14  -9    3.17    4.00
  16  15  -8   -1.19    3.49
  15  16  -7  147.07    6.87
  14  17  -6    3.08    2.85
  13  18  -5   -0.65    2.55
  12  19  -4   -2.47    2.62
  11  20  -3  159.35    6.26
  20  11   3    4.91    2.56
  10  21  -2  124.09    5.30
  21  10   2  107.63    4.20
   9  22  -1  167.52    5.81
  22   9   1  101.87    4.22
   8  23   0   75.83    4.78
  23   8   0    7.94    2.29
   7  24   1  372.13    8.12
  24   7  -1   49.89    3.95
   6  25   2  114.36    5.49
  25   6  -2   35.04    3.64
   5  26   3  298.71    7.71
  26   5  -3   29.58    3.61
  -5 -26  -3  299.80    7.74
   4  27   4   -0.65    2.68
  27   4  -4   55.75    4.66
  -4 -27  -4   -0.84    2.64
   3  28   5   47.33    5.14
  28   3  -5    9.68    3.19
  -3 -28  -5   43.29    5.10
   2  29   6   18.39    3.89
  29   2  -6    1.25    3.49
  -2 -29  -6   25.30    4.12
   1  30   7    4.46    3.64
  30   1  -7   18.93    4.60
  -1 -30  -7    8.93    3.90
   0  31   8   -0.86    3.48
  31   0  -8   -0.56    4.06
   0 -31  -8    2.90    4.22
  17  16  -8    2.97    3.86
  16  17  -7   10.75    3.57
  15  18  -6   14.75    3.83
  14  19  -5    1.51    2.78
  13  20  -4    4.76    2.80
  12  21  -3    4.91    3.00
  11  22  -2   19.60    3.22
  22  11   2  240.80    6.00
  10  23  -1    0.56    2.45
  23  10   1   92.08    4.37
   9  24   0    1.66    2.46
  24   9   0   25.97    3.01
   8  25   1   26.96    3.38
  25   8  -1   42.04    4.09
   7  26   2   16.82    3.35
  26   7  -2   35.34    4.31
   6  27   3   20.57    3.25
  27   6  -3  106.27    5.71
   5  28   4   10.68    3.02
  28   5  -4  231.37    7.39
  -5 -28  -4   11.12    2.99
   4  29   5   93.52    6.03
  29   4  -5    2.13    3.34
  -4 -29  -5   98.84    6.14
   3  30   6    4.16    3.54
  30   3  -6   10.74    3.72
  -3 -30  -6   -0.28    3.39
   2  31   7   23.52    4.41
  31   2  -7   44.84    5.25
  -2 -31  -7   19.34    4.34
  18  17  -8   27.56    4.69
  17  18  -7    1.23    3.30
  16  19  -6   29.71    4.25
  15  20  -5    0.29    2.87
  14  21  -4   23.09    3.73
  13  22  -3  232.33    7.38
  12  23  -2  123.25    5.76
  23  12   2   16.81    3.45
  11  24  -1   14.17    3.41
  24  11   1   -0.49    2.23
  10  25   0  156.74    6.47
  25  10   0    9.33    2.73
   9  26   1    2.43    2.69
  26   9  -1    0.18    2.52
   8  27   2    9.36    2.98
  27   8  -2   96.25    5.05
   7  28   3    3.81    3.09
  28   7  -3    3.92    2.72
   6  29   4   85.32    5.91
  29   6  -4    7.43    3.20
  -6 -29  -4   87.77    5.88
   5  30   5   65.73    5.82
  30   5  -5   28.52    4.58
  -5 -30  -5   66.25    5.84
   4  31   6    0.15    3.55
  31   4  -6    2.28    3.49
  -4 -31  -6   -1.11    3.56
   3  32   7   23.82    4.60
  32   3  -7    2.71    3.78
  -3 -32  -7   21.80    4.82
  18  19  -7   29.11    5.03
  17  20  -6   10.25    4.07
  16  21  -5    0.85    3.48
  15  22  -4   25.83    4.30
  14  23  -3   10.48    3.66
  13  24  -2   57.65    4.94
  12  25  -1   66.08    5.57
  25  12   1    1.05    2.50
  11  26   0  127.36    5.97
  26  11   0   73.54    4.82
  10  27   1  219.66    7.15
  27  10  -1   -0.73    2.32
   9  28   2    8.37    3.48
  28   9  -2    0.62    2.55
   8  29   3   30.23    3.91
  29   8  -3    3.02    3.23
   7  30   4    1.18    3.37
  30   7  -4   50.88    5.79
   6  31   5   70.77    6.21
  31   6  -5   21.68    4.18
  -6 -31  -5   77.29    6.30
   5  32   6    4.57    3.82
  32   5  -6   18.58    4.31
  -5 -32  -6    1.62    3.66
  19  20  -7   -1.67    4.04
  18  21  -6    2.47    3.96
  17  22  -5   12.09    4.08
  16  23  -4   24.57    4.50
  15  24  -3   76.82    5.74
  14  25  -2    9.29    3.35
  13  26  -1   13.77    3.51
  26  13   1   47.54    6.31
  12  27   0    2.72    2.99
  27  12   0   35.97    3.92
  11  28   1   37.05    4.49
  28  11  -1   44.59    4.87
  10  29   2   68.50    5.33
  29  10  -2   10.49    3.44
   9  30   3    3.10    3.16
  30   9  -3   80.48    6.14
   8  31   4   46.43    5.66
  31   8  -4    1.53    3.23
   7  32   5    9.76    3.96
  32   7  -5   11.63    4.30
  33   6  -6    5.29    4.40
  19  22  -6    2.98    3.79
  18  23  -5   91.26    6.61
  17  24  -4   77.56    6.18
  16  25  -3    6.59    3.91
  15  26  -2  118.07    6.55
  14  27  -1   28.32    4.59
  13  28   0   19.97    4.23
  28  13   0   79.42    5.75
  12  29   1   16.29    4.15
  29  12  -1    2.65    3.20
  11  30   2   19.15    4.09
  30  11  -2   25.92    4.22
  10  31   3   26.75    4.55
  31  10  -3   -4.05    3.34
   9  32   4   11.52    4.08
  32   9  -4   -0.28    3.27
   8  33   5   25.25    4.54
  33   8  -5   -0.44    3.52
  19  24  -5   15.80    4.35
  18  25  -4   44.11    5.17
  17  26  -3    1.01    3.48
  16  27  -2    1.70    3.43
  15  28  -1   -2.44    3.60
  14  29   0   -1.18    3.62
  13  30   1    9.20    3.65
  30  13  -1    2.11    3.38
  12  31   2    4.14    3.82
  31  12  -2  277.01    8.87
  11  32   3   -2.08    3.22
  32  11  -3    4.94    3.87
  10  33   4    2.90    4.01
  33  10  -4   43.94    5.13
  19  26  -4    0.09    4.15
  18  27  -3   17.02    4.41
  17  28  -2   -2.72    4.00
  16  29  -1    2.65    3.57
  15  30   0   20.29    4.68
  14  31   1    5.00    4.05
  31  14  -1   26.02    4.57
  13  32   2   22.13    4.60
  32  13  -2   39.38    4.66
  12  33   3   53.38    6.60
  33  12  -3   12.20    4.17
  18  29  -2   18.53    4.96
  17  30  -1    9.77    4.58
  16  31   0    1.17    4.22
  15  32   1   39.59    5.37
   2  -2 -11    1.12    3.32
   1  -1 -10   27.13    3.98
   0   0  -9   54.89    4.18
   0   0  -9   60.43    5.22
   0   0   9   62.85    5.37
  -1   1  -8   32.36    3.06
  -1   1  -8   36.54    4.17
   1  -1   8   45.40    4.47
  -2   2  -7   64.30    3.14
  -2   2  -7   71.92    4.20
   2  -2   7   81.83    4.17
  -3   3  -6   -0.26    1.11
  -3   3  -6   -0.52    1.52
   3  -3   6   -1.36    1.73
  -4   4  -5  163.59    3.33
  -4   4  -5  183.80    4.40
   4  -4   5  204.01    4.64
  -5   5  -4   21.69    1.40
  -5   5  -4   25.53    1.92
   5  -5   4   26.72    2.21
  -6   6  -3   83.30    1.75
  -6   6  -3   82.27    2.42
   6  -6   3   91.65    2.59
  -7   7  -2  563.68    3.55
  -7   7  -2  531.83    5.02
  -7   7  -2  632.44    5.48
   7  -7   2  599.03    5.39
  -8   8  -1  552.31    4.76
   8  -8   1  924.88    4.66
  -9   9   0   71.34    1.84
   9  -9   0  214.45    2.77
  10 -10  -1  118.44    2.58
  10 -10  -1   85.22    2.30
 -11  11   2  114.61    2.89
  11 -11  -2  130.25    3.06
  11 -11  -2  118.57    3.02
 -12  12   3  230.38    4.56
  12 -12  -3  230.88    4.51
  12 -12  -3  227.88    4.56
 -13  13   4  443.36    6.77
  13 -13  -4  435.85    6.82
  13 -13  -4  454.21    6.86
 -14  14   5  140.73    4.83
  14 -14  -5  127.93    4.42
  14 -14  -5  135.72    4.59
 -15  15   6   11.97    2.50
  15 -15  -6    6.29    2.22
  15 -15  -6    8.41    2.38
 -16  16   7  151.60    6.24
  16 -16  -7  133.72    5.82
  16 -16  -7  148.76    6.19
 -17  17   8   71.29    5.77
 -17  17   8   66.50    4.85
  17 -17  -8   65.97    5.45
  17 -17  -8   71.99    5.76
 -18  18   9   80.27    6.05
  18 -18  -9   69.88    6.16
  18 -18  -9   80.36    6.00
 -19  19  10   28.88    4.73
  19 -19 -10   27.36    4.83
  19 -19 -10   25.36    4.58
   3  -1 -11   63.03    6.58
   1  -3 -11   24.00    4.27
   2   0 -10   70.80    4.80
   2   0 -10   83.36    6.25
   0  -2 -10   83.75    5.72
   1   1  -9  148.47    5.38
   1   1  -9  176.59    6.93
  -1  -1  -9   41.84    3.97
  -1  -1  -9   48.75    4.56
   1   1   9   55.94    5.27
  -1  -1   9  196.65    7.18
   0   2  -8  123.04    4.52
   0   2  -8  142.40    5.84
  -2   0  -8  136.38    4.51
  -2   0  -8  144.80    5.52
   2   0   8  165.51    5.91
   0  -2   8  155.36    5.97
  -1   3  -7  100.04    3.82
  -1   3  -7  120.37    4.69
  -3   1  -7  141.93    4.15
  -3   1  -7  161.75    5.18
   3  -1   7  169.32    5.39
   1  -3   7  128.42    5.05
  -2   4  -6   90.28    3.16
  -2   4  -6   97.49    3.91
  -4   2  -6   36.37    2.32
  -4   2  -6   38.61    2.90
   4  -2   6   44.39    3.18
   2  -4   6  118.99    4.40
  -3   5  -5   95.81    2.81
  -3   5  -5  106.09    3.72
  -5   3  -5  601.99    5.86
  -5   3  -5  660.07    7.91
   5  -3   5  742.63    8.52
   3  -5   5  118.16    3.86
  -4   6  -4  526.42    5.19
  -4   6  -4  570.29    6.72
  -6   4  -4  185.73    2.82
  -6   4  -4  203.70    4.12
   6  -4   4  224.43    4.37
   4  -6   4  629.42    6.82
  -5   7  -3  106.40    2.12
  -5   7  -3  110.60    2.79
  -7   5  -3   16.29    0.91
  -7   5  -3   18.76    1.45
   7  -5   3   18.60    1.64
   5  -7   3  127.72    2.98
  -6   8  -2  252.52    2.81
  -6   8  -2  236.62    3.53
  -6   8  -2  278.65    3.59
  -8   6  -2   89.98    1.22
  -8   6  -2   85.39    2.15
   8  -6   2   93.03    2.46
   6  -8   2  264.69    3.58
  -7   9  -1 1046.75    5.57
  -7   9  -1  592.81    5.07
  -9   7  -1   61.81    1.66
   9  -7   1  103.07    1.45
   7  -9   1 1023.40    5.52
  -8  10   0    2.51    0.67
 -10   8   0   66.07    1.74
  10  -8   0  195.20    2.54
   8 -10   0    2.78    0.72
  -9  11   1  420.60    4.73
  11  -9  -1  271.32    3.67
  11  -9  -1  189.59    3.16
   9 -11  -1  696.47    5.92
   9 -11  -1  447.44    4.89
 -10  12   2  171.85    3.50
 -12  10   2   63.40    2.24
  12 -10  -2   67.95    2.35
  12 -10  -2   64.47    2.27
  10 -12  -2  207.03    3.89
  10 -12  -2  172.69    3.52
 -11  13   3   16.95    1.86
 -13  11   3  246.95    4.66
  13 -11  -3  253.14    4.78
  13 -11  -3  252.51    4.72
  11 -13  -3   20.56    1.94
  11 -13  -3   19.25    1.94
 -12  14   4   71.30    3.38
 -14  12   4   56.36    2.93
  14 -12  -4   50.52    3.07
  14 -12  -4   57.75    2.98
  12 -14  -4   64.28    3.09
  12 -14  -4   65.61    3.14
 -13  15   5    0.20    1.67
 -15  13   5    0.85    1.87
  15 -13  -5    0.45    1.61
  15 -13  -5    2.00    1.93
  13 -15  -5   -0.51    1.64
  13 -15  -5    1.72    1.76
 -14  16   6   27.46    3.33
 -16  14   6   21.75    2.86
  16 -14  -6   23.12    3.00
  16 -14  -6   22.09    2.85
  14 -16  -6   20.93    2.74
  14 -16  -6   21.21    2.83
 -15  17   7    7.29    2.97
 -15  17   7    4.21    2.30
 -17  15   7   62.56    4.56
  17 -15  -7   65.74    4.84
  17 -15  -7   67.42    4.63
  15 -17  -7    5.03    2.49
  15 -17  -7    8.90    2.98
 -16  18   8   56.24    4.97
 -16  18   8   51.81    4.55
 -18  16   8   29.06    4.13
 -18  16   8   23.77    3.37
  18 -16  -8   30.85    3.82
  18 -16  -8   30.89    3.97
  16 -18  -8   51.95    4.73
  16 -18  -8   56.38    4.95
 -17  19   9  181.53    8.09
 -19  17   9   74.11    6.55
  19 -17  -9   62.39    6.04
  19 -17  -9   72.49    6.46
  17 -19  -9  167.92    7.12
  17 -19  -9  185.92    8.11
 -18  20  10    1.43    4.10
 -20  18  10   40.73    5.18
  20 -18 -10   41.10    4.98
  20 -18 -10   39.67    5.10
  18 -20 -10    0.61    3.65
  18 -20 -10    4.62    4.14
   4   0 -11    3.56    3.53
   0  -4 -11    3.58    3.40
   3   1 -10   95.16    5.28
   3   1 -10  109.86    6.23
  -1  -3 -10   13.92    3.86
   2   2  -9   54.64    4.12
   2   2  -9   54.21    4.73
  -2  -2  -9    4.89    3.05
   2   2   9    4.94    2.80
  -2  -2   9   71.50    5.40
   1   3  -8   22.18    2.64
   1   3  -8   29.64    3.54
  -3  -1  -8   56.40    3.52
  -3  -1  -8   55.57    4.15
   3   1   8   67.64    4.49
  -1  -3   8   31.79    3.58
   0   4  -7    6.43    1.83
   0   4  -7    8.59    2.27
  -4   0  -7    8.06    1.70
  -4   0  -7   11.11    2.49
   4   0   7    5.99    2.23
   0  -4   7    8.35    2.19
  -1   5  -6   51.15    2.75
  -1   5  -6   61.78    3.61
  -5   1  -6  173.74    3.80
  -5   1  -6  173.19    4.92
   5  -1   6  192.81    5.18
   1  -5   6   63.81    3.38
  -2   6  -5   59.64    2.49
  -2   6  -5   63.70    3.00
  -6   2  -5   38.80    1.90
  -6   2  -5   38.14    2.65
   6  -2   5   44.57    2.81
   2  -6   5   70.31    3.21
  -3   7  -4   16.35    1.57
  -3   7  -4   22.97    2.12
  -7   3  -4  783.79    5.26
  -7   3  -4  839.62    7.81
   7  -3   4  901.51    8.45
   3  -7   4   17.66    1.78
  -4   8  -3   16.21    1.22
  -4   8  -3   18.92    1.56
  -8   4  -3  973.12    4.27
  -8   4  -3 1020.59    7.52
   8  -4   3 1088.56    8.32
   4  -8   3   19.89    1.50
  -5   9  -2  113.63    2.23
  -5   9  -2  104.27    2.50
  -5   9  -2  134.93    2.52
  -9   5  -2    0.95    0.65
   9  -5   2    1.58    0.84
   5  -9   2  123.92    2.49
  -6  10  -1  958.54    5.92
  -6  10  -1  550.96    5.06
 -10   6  -1  156.50    2.44
  10  -6   1  254.87    1.98
   6 -10   1  926.28    5.82
  -7  11   0    9.01    1.04
 -11   7   0  142.15    2.36
  11  -7   0  402.45    3.53
   7 -11   0   24.69    1.41
  -8  12   1   -0.26    0.72
 -12   8   1   21.11    1.32
  12  -8  -1   28.60    1.42
  12  -8  -1   21.12    1.37
   8 -12  -1    0.39    0.86
   8 -12  -1    0.97    0.82
  -9  13   2   69.98    2.43
 -13   9   2  192.08    3.52
  13  -9  -2  208.13    3.78
  13  -9  -2  199.68    3.65
   9 -13  -2   89.13    2.82
   9 -13  -2   74.14    2.50
 -10  14   3  212.02    4.50
 -14  10   3  160.70    3.74
  14 -10  -3  160.37    3.87
  14 -10  -3  164.97    3.81
  10 -14  -3  233.53    4.60
  10 -14  -3  218.04    4.56
 -11  15   4  121.74    3.94
 -15  11   4  234.03    5.01
  15 -11  -4  208.96    4.89
  15 -11  -4  234.77    5.03
  11 -15  -4  128.06    3.99
  11 -15  -4  131.02    4.07
 -12  16   5  758.60    9.73
 -16  12   5    9.76    2.21
  16 -12  -5   11.32    2.27
  16 -12  -5   12.59    2.33
  12 -16  -5  753.49    9.61
  12 -16  -5  769.60    9.81
 -13  17   6   77.87    4.60
 -17  13   6    0.66    2.05
  17 -13  -6    2.49    2.07
  17 -13  -6    2.11    2.12
  13 -17  -6   72.54    4.39
  13 -17  -6   76.31    4.60
 -14  18   7    8.65    2.72
 -14  18   7   10.85    2.83
 -18  14   7   14.79    2.97
  18 -14  -7   16.59    3.21
  18 -14  -7   19.02    3.16
  14 -18  -7    9.68    2.66
  14 -18  -7   10.56    2.80
 -15  19   8    0.61    2.79
 -15  19   8    1.74    2.53
 -19  15   8    1.67    3.16
 -19  15   8    0.86    2.73
  19 -15  -8    4.23    3.05
  19 -15  -8    2.04    3.17
  15 -19  -8    0.45    2.61
  15 -19  -8    4.16    2.93
 -16  20   9   18.94    4.31
 -20  16   9    2.16    3.28
  20 -16  -9    5.29    3.22
  20 -16  -9    1.31    3.22
  16 -20  -9   13.86    3.88
  16 -20  -9   17.51    4.18
 -17  21  10   15.70    4.66
 -21  17  10   77.35    7.36
  21 -17 -10   60.41    6.67
  21 -17 -10   69.39    7.14
  17 -21 -10   12.79    4.18
  17 -21 -10   14.89    4.62
   5   1 -11    7.39    3.19
   5   1 -11    5.98    3.67
  -1  -5 -11   12.44    4.21
   4   2 -10   -1.64    2.53
   4   2 -10   -0.69    3.33
  -2  -4 -10    2.11    2.95
   3   3  -9   -2.18    2.14
   3   3  -9    1.06    2.97
  -3  -3  -9   54.22    4.60
   3   3   9   53.97    4.84
  -3  -3   9    1.45    2.76
   2   4  -8    4.32    2.07
   2   4  -8    6.94    2.79
  -4  -2  -8   35.22    3.16
  -4  -2  -8   33.49    3.75
   4   2   8   40.83    4.09
  -2  -4   8    7.57    2.75
   1   5  -7  320.38    6.29
   1   5  -7  367.93    7.48
  -5  -1  -7  109.43    3.56
  -5  -1  -7  113.31    4.54
   5   1   7  117.49    5.16
  -1  -5   7  392.23    7.62
   0   6  -6  265.53    5.27
   0   6  -6  304.72    6.40
  -6   0  -6  305.80    4.74
  -6   0  -6  307.54    6.17
   6   0   6  334.52    6.58
   0  -6   6  339.90    6.45
  -1   7  -5   82.99    2.94
  -1   7  -5   92.23    3.61
  -7   1  -5  150.00    2.96
  -7   1  -5  153.06    4.11
   7  -1   5  163.30    4.39
   1  -7   5  102.97    3.58
  -2   8  -4   76.24    2.42
  -2   8  -4   82.42    2.93
  -8   2  -4  780.41    5.01
  -8   2  -4  763.00    7.34
   8  -2   4  841.00    8.34
   2  -8   4   94.21    2.99
  -3   9  -3   38.46    1.75
  -3   9  -3   42.31    2.02
  -9   3  -3  200.40    1.78
  -9   3  -3  192.75    3.37
   9  -3   3  200.83    3.84
   3  -9   3   50.78    2.03
  -4  10  -2   12.97    1.25
  -4  10  -2   13.46    1.32
  -4  10  -2   15.24    1.22
 -10   4  -2   20.15    1.22
  10  -4   2   20.84    1.73
   4 -10   2   14.95    1.24
  -5  11  -1  469.06    4.56
  -5  11  -1  286.63    3.83
 -11   5  -1    5.63    0.72
  11  -5   1    9.51    0.59
   5 -11   1  450.98    4.47
  -6  12   0   79.19    2.17
 -12   6   0   86.91    1.84
  12  -6   0  223.67    2.71
   6 -12   0  216.40    3.33
  -7  13   1   15.20    1.41
 -13   7   1   -0.53    0.59
  13  -7  -1    0.65    0.74
  13  -7  -1    0.56    0.67
   7 -13  -1   26.87    1.65
   7 -13  -1   16.75    1.37
  -8  14   2    0.75    0.87
 -14   8   2   23.03    1.67
  14  -8  -2   22.10    1.67
  14  -8  -2   23.24    1.68
   8 -14  -2    0.16    0.96
   8 -14  -2   -0.22    0.85
  -9  15   3  325.35    5.41
 -15   9   3  192.36    4.10
  15  -9  -3  193.77    4.36
  15  -9  -3  202.78    4.22
   9 -15  -3  379.35    5.84
   9 -15  -3  338.12    5.60
 -10  16   4  163.98    4.48
 -16  10   4  243.00    5.06
  16 -10  -4  232.36    5.17
  16 -10  -4  245.23    5.10
  10 -16  -4  175.76    4.74
  10 -16  -4  170.75    4.72
 -11  17   5  627.13    8.96
 -17  11   5    0.96    1.85
  17 -11  -5    1.55    1.91
  17 -11  -5    0.90    1.90
  11 -17  -5  647.47    9.00
  11 -17  -5  649.58    9.12
 -12  18   6    8.88    2.41
 -18  12   6  115.48    5.06
  18 -12  -6  118.96    5.12
  18 -12  -6  125.84    5.22
  12 -18  -6   11.26    2.44
  12 -18  -6   13.04    2.81
 -13  19   7   19.03    3.12
 -13  19   7   18.76    3.19
 -19  13   7   -0.09    2.36
  19 -13  -7   -0.34    2.26
  19 -13  -7    0.60    2.44
  13 -19  -7   22.01    3.16
  13 -19  -7   18.33    3.16
 -14  20   8   86.84    6.07
 -14  20   8   81.21    5.56
 -20  14   8    1.53    2.81
 -20  14   8    1.73    2.67
  20 -14  -8    0.32    2.99
  20 -14  -8    0.57    2.75
  14 -20  -8   86.82    5.32
  14 -20  -8   84.16    6.04
 -15  21   9   14.39    4.13
 -21  15   9  111.89    6.57
  21 -15  -9   91.92    6.05
  21 -15  -9  105.32    6.45
  15 -21  -9   12.53    3.47
  15 -21  -9   12.99    4.09
 -16  22  10    5.61    3.79
 -22  16  10   48.88    5.79
  22 -16 -10   39.03    4.98
  22 -16 -10   43.55    5.60
  16 -22 -10   10.01    4.17
  16 -22 -10    6.69    3.84
   6   2 -11   -0.84    2.89
   6   2 -11   -1.56    3.35
  -2  -6 -11   23.25    4.56
   5   3 -10  164.10    6.42
   5   3 -10  189.88    7.49
  -3  -5 -10   27.40    4.28
   4   4  -9   61.20    4.42
   4   4  -9   75.81    5.15
  -4  -4  -9    0.42    2.47
   4   4   9    5.37    2.87
  -4  -4   9   73.25    5.38
   3   5  -8    1.74    1.90
   3   5  -8    2.22    2.46
  -5  -3  -8  152.77    5.61
   5   3   8  171.92    6.52
  -3  -5   8    1.60    2.50
   2   6  -7   41.13    3.24
   2   6  -7   45.03    3.64
  -6  -2  -7    1.17    1.44
  -6  -2  -7    0.17    2.05
   6   2   7    1.78    2.10
  -2  -6   7   59.91    4.04
   1   7  -6   30.05    2.62
   1   7  -6   36.96    3.31
  -7  -1  -6   93.59    2.90
  -7  -1  -6   91.56    3.70
   7   1   6  105.35    4.24
  -1  -7   6   41.87    3.20
   0   8  -5    9.00    1.58
   0   8  -5    9.63    1.78
  -8   0  -5   10.68    1.21
  -8   0  -5   10.92    1.77
   8   0   5   11.30    1.97
   0  -8   5   10.71    1.70
  -1   9  -4   50.02    2.21
  -1   9  -4   53.91    2.57
  -9   1  -4  234.50    2.78
  -9   1  -4  227.41    4.17
   9  -1   4  240.91    4.71
   1  -9   4   64.85    2.59
  -2  10  -3  262.65    4.10
  -2  10  -3  279.83    4.48
 -10   2  -3  418.12    2.44
 -10   2  -3  404.03    4.68
  10  -2   3  414.19    5.43
   2 -10   3  317.99    4.18
  -3  11  -2   35.82    1.79
  -3  11  -2   39.70    1.94
  -3  11  -2   47.03    1.58
 -11   3  -2   38.36    1.48
   3 -11   2   38.05    1.53
  -4  12  -1   28.32    1.68
  -4  12  -1   19.49    1.46
 -12   4  -1    0.35    0.52
  12  -4   1    1.07    0.40
  -5  13   0  145.27    2.98
  -5  13   0   56.54    1.96
 -13   5   0  304.28    3.12
  13  -5   0  793.55    5.21
   5 -13   0  151.56    3.04
  -6  14   1   11.18    1.25
 -14   6   1   46.85    1.64
  14  -6  -1   63.54    2.00
  14  -6  -1   47.89    1.68
   6 -14  -1   25.11    1.87
  -7  15   2  107.63    3.06
 -15   7   2  417.98    4.98
  15  -7  -2  447.31    5.64
  15  -7  -2  434.44    5.07
   7 -15  -2  145.62    3.53
   7 -15  -2  109.80    3.12
  -8  16   3   31.05    2.41
 -16   8   3  564.51    6.62
  16  -8  -3  552.59    7.00
  16  -8  -3  568.49    6.65
   8 -16  -3   37.22    2.65
   8 -16  -3   32.18    2.45
  -9  17   4  501.74    7.41
 -17   9   4    2.09    1.38
  17  -9  -4    1.17    1.47
  17  -9  -4    0.93    1.49
   9 -17  -4  549.33    7.73
   9 -17  -4  517.21    7.52
 -10  18   5   16.41    2.57
 -18  10   5   78.88    3.72
  18 -10  -5   78.16    3.90
  18 -10  -5   80.77    3.78
  10 -18  -5   19.28    2.67
  10 -18  -5   17.79    2.64
 -11  19   6    1.31    2.10
 -11  19   6   -0.73    1.76
 -19  11   6    1.71    2.01
  19 -11  -6    1.13    2.05
  19 -11  -6   -0.69    2.21
  11 -19  -6   -0.47    2.03
  11 -19  -6    1.34    2.14
 -12  20   7  101.62    5.23
 -12  20   7  112.25    5.53
 -20  12   7   45.89    4.68
  20 -12  -7   36.08    4.46
  20 -12  -7   44.42    4.64
  12 -20  -7  104.41    5.51
  12 -20  -7  107.09    5.36
 -13  21   8    0.08    2.77
 -13  21   8    0.03    2.45
 -21  13   8   28.63    3.87
 -21  13   8   19.90    3.28
  21 -13  -8   31.67    4.20
  21 -13  -8   31.67    3.97
  13 -21  -8    2.25    2.75
  13 -21  -8    0.66    2.79
 -14  22   9   17.35    4.30
 -22  14   9   14.84    3.78
  22 -14  -9   12.46    3.61
  22 -14  -9   12.34    4.03
  14 -22  -9   14.01    3.97
  14 -22  -9   16.62    4.22
 -15  23  10    1.41    3.64
 -23  15  10   10.67    4.10
  23 -15 -10    6.86    3.71
  23 -15 -10    9.60    4.01
  15 -23 -10    3.19    3.89
  15 -23 -10    1.83    3.63
   7   3 -11   -0.63    3.03
   7   3 -11   -0.72    3.44
  -3  -7 -11   56.31    5.76
   6   4 -10   27.14    3.68
   6   4 -10   29.81    4.50
  -4  -6 -10  104.59    6.52
   5   5  -9    0.04    2.28
   5   5  -9   -0.43    2.66
  -5  -5  -9   98.12    5.82
   5   5   9  112.89    6.41
  -5  -5   9    1.70    2.62
   4   6  -8    7.64    2.42
   4   6  -8    9.50    2.80
  -6  -4  -8    4.21    2.54
   6   4   8    4.73    2.58
  -4  -6   8   11.36    2.64
   3   7  -7   86.81    4.11
   3   7  -7  104.05    4.66
  -7  -3  -7   -0.17    1.41
  -7  -3  -7   -0.32    2.02
   7   3   7    1.31    2.11
  -3  -7   7  108.16    4.66
   2   8  -6   45.52    3.01
   2   8  -6   47.42    3.53
  -8  -2  -6  137.21    3.35
  -8  -2  -6  140.69    4.47
   8   2   6  146.96    4.84
  -2  -8   6   54.20    3.12
   1   9  -5   47.13    2.76
   1   9  -5   51.78    2.94
  -9  -1  -5   36.86    1.88
  -9  -1  -5   38.42    2.62
   9   1   5   42.26    3.19
  -1  -9   5   60.58    2.97
   0  10  -4   30.75    2.17
   0  10  -4   35.68    2.50
 -10   0  -4   38.68    1.41
 -10   0  -4   35.61    2.10
  10   0   4   39.05    2.70
   0 -10   4   38.56    2.19
  -1  11  -3    5.63    1.22
  -1  11  -3    5.11    1.15
  -1  11  -3    8.38    1.13
 -11   1  -3  258.66    2.14
 -11   1  -3  251.57    3.71
  11  -1   3  257.87    2.13
  11  -1   3  251.02    4.49
   1 -11   3    6.30    1.02
  -2  12  -2   61.06    2.21
  -2  12  -2   57.67    2.14
  -2  12  -2   80.72    1.88
 -12   2  -2  203.84    2.78
  12  -2   2  212.58    1.66
   2 -12   2   61.99    1.71
  -3  13  -1    6.11    1.10
  -3  13  -1    4.69    0.99
  -3  13  -1    6.63    0.71
 -13   3  -1  386.75    3.23
  13  -3   1  556.82    3.62
  -4  14   0  790.51    6.98
  -4  14   0  327.42    4.39
 -14   4   0   77.15    1.58
  14  -4   0  201.87    2.90
   4 -14   0  795.58    7.00
  -5  15   1    2.92    0.94
 -15   5   1  124.05    2.35
  15  -5  -1  164.53    3.12
  15  -5  -1  127.32    2.39
   5 -15  -1   12.21    1.55
  -6  16   2  217.21    4.13
 -16   6   2  283.68    4.13
  16  -6  -2  316.69    4.95
  16  -6  -2  297.30    4.20
   6 -16  -2  313.84    5.21
   6 -16  -2  229.92    4.34
  -7  17   3   22.93    2.08
 -17   7   3  657.16    7.07
  17  -7  -3  645.11    7.69
  17  -7  -3  676.32    7.18
   7 -17  -3   28.63    2.58
   7 -17  -3   24.88    2.15
  -8  18   4    2.00    1.50
 -18   8   4   84.89    3.45
  18  -8  -4   82.33    3.57
  18  -8  -4   84.93    3.31
   8 -18  -4    1.28    1.59
   8 -18  -4    1.81    1.52
  -9  19   5    2.70    1.86
 -19   9   5   24.56    2.75
  19  -9  -5   25.69    3.01
  19  -9  -5   27.18    2.87
   9 -19  -5    4.17    2.16
   9 -19  -5    2.09    1.87
 -10  20   6   60.97    4.49
 -10  20   6   67.28    4.29
 -20  10   6   48.07    4.00
  20 -10  -6   47.27    3.83
  20 -10  -6   52.42    4.17
  10 -20  -6   71.92    4.59
  10 -20  -6   67.11    4.62
 -11  21   7    1.47    2.77
 -11  21   7    5.23    2.70
 -21  11   7    6.11    2.82
  21 -11  -7    8.15    2.72
  21 -11  -7    7.60    2.70
  11 -21  -7    5.59    2.85
  11 -21  -7    4.60    2.61
 -12  22   8    9.61    3.53
 -12  22   8    5.20    2.67
 -22  12   8   10.39    3.53
  22 -12  -8    6.96    3.08
  22 -12  -8   12.28    3.59
  12 -22  -8    7.81    3.26
  12 -22  -8   10.57    3.53
 -13  23   9    9.79    3.63
 -23  13   9    1.55    3.71
  23 -13  -9    5.92    3.74
  23 -13  -9   10.31    3.95
  13 -23  -9    7.64    3.63
  13 -23  -9   10.18    3.58
 -14  24  10   44.43    5.74
 -24  14  10    7.01    4.25
  24 -14 -10    4.86    3.73
  24 -14 -10    6.90    4.29
  14 -24 -10   37.76    4.87
  14 -24 -10   47.41    5.79
   8   4 -11    8.16    3.11
   8   4 -11    9.06    3.89
  -4  -8 -11   -3.69    3.56
   7   5 -10   23.67    3.74
   7   5 -10   28.73    4.57
  -5  -7 -10  168.15    7.44
   6   6  -9   12.37    2.99
   6   6  -9   16.53    3.43
  -6  -6  -9   17.17    3.40
   6   6   9   13.86    3.32
  -6  -6   9   14.50    3.21
   5   7  -8   63.35    4.32
   5   7  -8   73.34    4.70
  -7  -5  -8   -0.80    2.36
   7   5   8    1.20    2.69
  -5  -7   8   84.07    4.86
   4   8  -7   21.69    2.69
   4   8  -7   23.66    2.92
  -8  -4  -7   61.22    3.96
   8   4   7   66.00    4.24
  -4  -8   7   27.44    3.39
   3   9  -6  303.08    6.11
   3   9  -6  353.89    6.87
  -9  -3  -6  195.95    3.89
  -9  -3  -6  190.66    4.87
   9   3   6  209.95    5.83
  -3  -9   6  386.17    6.69
   2  10  -5   59.84    3.11
   2  10  -5   66.51    3.23
 -10  -2  -5  688.18    5.79
 -10  -2  -5  657.69    7.65
  10   2   5  714.45    8.88
  -2 -10   5   70.53    3.06
   1  11  -4    8.15    1.55
   1  11  -4    6.51    1.59
 -11  -1  -4  181.26    2.61
 -11  -1  -4  176.68    3.72
  11   1   4  178.48    4.41
  -1 -11   4    8.15    1.33
   0  12  -3  200.70    4.08
   0  12  -3  222.30    4.27
   0  12  -3  273.49    3.72
 -12   0  -3  241.62    3.57
  12   0   3  245.54    2.40
  12   0   3  232.10    4.33
   0 -12   3  246.44    3.58
  -1  13  -2 1277.16    9.36
  -1  13  -2 1191.26    8.66
  -1  13  -2 1738.12    7.41
 -13   1  -2  381.49    3.61
  13  -1   2  385.50    2.83
   1 -13   2 1248.60    6.33
  -2  14  -1  476.65    5.75
  -2  14  -1  320.57    4.44
  -2  14  -1  480.28    3.44
 -14   2  -1   18.27    0.89
  14  -2   1   26.90    1.22
  -3  15   0  672.96    6.82
  -3  15   0  292.45    4.27
 -15   3   0  234.05    2.48
  15  -3   0  575.51    5.05
   3 -15   0  682.61    6.87
  -4  16   1  338.38    4.77
 -16   4   1   46.04    1.52
  16  -4  -1   62.17    2.17
  16  -4  -1   45.41    1.56
   4 -16  -1  774.48    7.62
  -5  17   2   24.23    1.78
 -17   5   2  175.73    3.30
  17  -5  -2  190.08    4.09
  17  -5  -2  179.04    3.35
   5 -17  -2   40.42    2.64
   5 -17  -2   26.35    1.90
  -6  18   3   46.05    2.69
 -18   6   3  290.34    4.81
  18  -6  -3  285.07    5.49
  18  -6  -3  302.96    4.92
   6 -18  -3   59.97    3.01
   6 -18  -3   50.28    2.82
  -7  19   4   38.80    2.80
 -19   7   4   59.55    3.08
  19  -7  -4   57.96    3.50
  19  -7  -4   64.45    3.00
   7 -19  -4   43.67    3.05
   7 -19  -4   38.27    2.83
  -8  20   5   29.62    3.41
  -8  20   5   35.13    3.26
 -20   8   5    9.53    2.13
  20  -8  -5    9.18    2.23
  20  -8  -5   10.25    2.23
   8 -20  -5   28.59    3.11
   8 -20  -5   34.01    3.50
  -9  21   6   44.08    4.23
  -9  21   6   43.80    3.94
 -21   9   6   25.39    3.13
  21  -9  -6   15.14    2.77
  21  -9  -6   26.24    3.19
   9 -21  -6   43.90    3.80
   9 -21  -6   42.85    3.86
 -10  22   7   34.65    3.89
 -10  22   7   27.85    3.29
 -22  10   7  185.15    6.25
  22 -10  -7  169.11    6.35
  22 -10  -7  206.57    6.86
  10 -22  -7   35.01    4.00
  10 -22  -7   33.51    4.08
 -11  23   8    2.76    2.89
 -11  23   8    0.74    2.52
 -23  11   8    0.31    2.99
  23 -11  -8    0.93    2.81
  23 -11  -8    1.81    3.09
  11 -23  -8    2.89    3.15
  11 -23  -8   -0.28    2.76
 -12  24   9   20.38    4.45
 -24  12   9    6.60    3.45
  24 -12  -9    3.59    3.76
  24 -12  -9    7.31    3.51
  12 -24  -9   19.13    3.80
  12 -24  -9   17.02    4.25
 -13  25  10   -0.66    4.02
 -25  13  10   35.28    5.21
  25 -13 -10   35.93    5.41
  25 -13 -10   27.98    5.00
  13 -25 -10    1.17    3.88
  13 -25 -10   -1.72    3.88
   9   5 -11   -1.67    2.62
   9   5 -11    0.20    3.88
  -5  -9 -11   -2.65    3.55
   8   6 -10    1.51    2.86
   8   6 -10    1.31    3.21
  -6  -8 -10    1.50    2.95
   7   7  -9   -1.93    2.44
   7   7  -9   -1.25    3.07
  -7  -7  -9   75.26    5.41
   7   7   9   80.36    6.03
  -7  -7   9    3.40    2.73
   6   8  -8   -0.45    2.18
   6   8  -8    0.55    2.70
  -8  -6  -8   44.90    4.24
   8   6   8   52.22    5.02
  -6  -8   8    0.14    2.29
   5   9  -7   37.21    3.54
   5   9  -7   48.66    4.22
  -9  -5  -7   85.53    4.03
   9   5   7   91.81    5.03
  -5  -9   7   46.83    3.72
   4  10  -6   22.11    2.60
   4  10  -6   24.89    2.86
 -10  -4  -6  308.62    5.04
 -10  -4  -6  282.22    5.90
  10   4   6  316.64    6.71
  -4 -10   6   30.07    2.94
   3  11  -5    8.72    1.91
   3  11  -5   12.46    2.12
 -11  -3  -5  100.38    2.64
 -11  -3  -5  103.17    3.45
  11   3   5  112.09    4.26
  -3 -11   5   12.56    1.72
   2  12  -4   60.90    3.04
   2  12  -4   64.48    2.88
 -12  -2  -4   59.46    1.84
 -12  -2  -4   54.14    2.42
  12   2   4   60.67    1.83
  12   2   4   59.46    2.95
  -2 -12   4   72.20    2.62
   1  13  -3    0.75    1.23
   1  13  -3    0.56    1.13
   1  13  -3    0.59    0.83
 -13  -1  -3   33.03    1.66
  13   1   3   35.83    1.37
  13   1   3   29.97    2.33
  -1 -13   3    0.74    0.80
   0  14  -2   43.83    2.32
   0  14  -2   38.05    2.11
   0  14  -2   54.97    1.52
 -14   0  -2   47.49    1.47
  14   0   2   46.82    1.43
  -1  15  -1  299.35    4.87
  -1  15  -1  200.01    3.68
  -1  15  -1  323.95    2.64
 -15   1  -1  664.35    3.59
  15  -1   1  764.25    5.30
  -2  16   0  126.97    3.38
  -2  16   0   56.47    2.21
 -16   2   0   14.16    0.76
  16  -2   0   27.80    1.59
   2 -16   0  123.34    3.32
  -3  17   1    0.68    1.15
  -3  17   1    0.20    0.80
 -17   3   1  151.30    2.44
  17  -3  -1  206.80    3.79
  17  -3  -1  153.52    2.47
   3 -17  -1    1.79    1.22
  -4  18   2  264.82    4.72
 -18   4   2  205.50    3.49
  18  -4  -2  222.80    4.46
  18  -4  -2  214.78    3.57
   4 -18  -2  439.68    6.44
   4 -18  -2  289.74    4.97
  -5  19   3    4.36    1.37
 -19   5   3   36.44    2.23
  19  -5  -3   34.31    2.57
  19  -5  -3   37.63    2.28
   5 -19  -3    6.62    1.72
   5 -19  -3    4.23    1.52
  -6  20   4   43.97    3.18
 -20   6   4   33.64    2.68
  20  -6  -4   28.63    3.13
  20  -6  -4   32.58    2.71
   6 -20  -4   53.63    3.62
   6 -20  -4   45.61    3.23
  -7  21   5   40.38    3.62
  -7  21   5   45.49    3.53
 -21   7   5   17.90    2.47
  21  -7  -5   15.12    2.52
  21  -7  -5   18.14    2.55
   7 -21  -5   46.93    3.56
   7 -21  -5   37.93    3.62
  -8  22   6   53.54    4.40
  -8  22   6   60.99    4.27
 -22   8   6    0.07    2.00
  22  -8  -6    0.32    2.49
  22  -8  -6    2.07    2.11
   8 -22  -6   59.82    4.56
   8 -22  -6   53.66    4.44
  -9  23   7  132.23    5.79
  -9  23   7  159.94    6.20
 -23   9   7   37.66    4.47
  23  -9  -7   32.65    3.79
  23  -9  -7   39.75    4.58
   9 -23  -7  142.19    5.86
   9 -23  -7  142.25    5.94
 -10  24   8   12.37    3.29
 -10  24   8   14.61    3.41
 -24  10   8   61.75    5.58
  24 -10  -8   59.21    5.25
  24 -10  -8   65.61    5.70
  10 -24  -8   13.84    3.35
  10 -24  -8   15.17    3.48
 -11  25   9   25.77    4.52
 -25  11   9    5.94    3.89
  25 -11  -9    5.03    3.45
  25 -11  -9    1.31    3.68
  11 -25  -9   20.06    3.89
  11 -25  -9   23.36    4.43
  12 -26 -10   40.11    4.97
  10   6 -11    0.34    3.26
  10   6 -11    2.25    4.11
  -6 -10 -11    9.36    4.13
   9   7 -10   -0.14    2.81
   9   7 -10    2.34    3.64
  -7  -9 -10   50.94    5.69
   8   8  -9   56.57    4.95
   8   8  -9   62.00    5.68
  -8  -8  -9  127.78    6.17
   8   8   9  142.42    8.64
  -8  -8   9   68.76    5.16
   7   9  -8   17.38    3.05
   7   9  -8   19.30    3.19
  -9  -7  -8   58.14    4.51
   9   7   8   54.50    5.10
  -7  -9   8   17.92    2.95
   6  10  -7   12.82    2.46
   6  10  -7   14.19    2.73
 -10  -6  -7  122.52    4.83
  10   6   7  136.60    5.67
  -6 -10   7   16.59    2.54
   5  11  -6    0.99    1.70
   5  11  -6   -0.72    1.73
 -11  -5  -6   45.39    3.15
  11   5   6   49.32    3.97
  -5 -11   6    1.46    1.69
   4  12  -5  679.98    9.03
   4  12  -5  767.32    9.19
 -12  -4  -5   11.65    1.40
 -12  -4  -5   12.06    1.79
  12   4   5   13.98    2.32
  -4 -12   5  852.61    8.43
   3  13  -4   29.72    2.74
   3  13  -4   32.92    2.41
 -13  -3  -4   41.27    1.81
 -13  -3  -4   40.32    2.21
  13   3   4   41.35    1.80
  13   3   4   42.51    2.96
  -3 -13   4   36.67    2.13
   2  14  -3  201.90    4.59
   2  14  -3  223.24    4.46
   2  14  -3  273.29    3.54
 -14  -2  -3   19.61    1.48
  14   2   3   22.02    1.37
  14   2   3   19.98    2.20
  -2 -14   3  240.17    3.36
   1  15  -2    3.07    1.31
   1  15  -2    1.69    1.11
   1  15  -2    1.46    0.62
 -15  -1  -2    7.01    0.78
  15   1   2    7.09    0.96
   0  16  -1  233.48    4.72
   0  16  -1  159.15    3.42
   0  16  -1  274.22    2.15
 -16   0  -1  254.39    1.96
  16   0   1  258.26    3.50
  -1  17   0    7.49    1.48
  -1  17   0    2.94    1.05
 -17   1   0   14.89    0.72
  17  -1   0   30.33    1.79
   1 -17   0   10.28    1.67
  -2  18   1  206.21    4.65
  -2  18   1   85.24    2.73
 -18   2   1   56.55    1.59
  18  -2  -1   81.38    2.83
  18  -2  -1   60.90    1.64
   2 -18  -1  210.50    4.70
  -3  19   2   11.97    1.54
 -19   3   2   92.88    2.49
  19  -3  -2  101.21    3.51
  19  -3  -2   94.00    2.52
   3 -19  -2   20.21    2.31
  -4  20   3  120.69    3.69
 -20   4   3   67.96    2.66
  20  -4  -3   73.08    3.33
  20  -4  -3   74.60    2.77
   4 -20  -3  173.47    4.75
   4 -20  -3  129.76    3.98
  -5  21   4    0.18    1.45
  -5  21   4   -0.69    1.45
 -21   5   4  516.13    7.15
  21  -5  -4  500.06    8.18
  21  -5  -4  529.23    7.18
   5 -21  -4    0.16    1.77
   5 -21  -4   -0.11    1.46
  -6  22   5  228.45    6.12
  -6  22   5  283.55    6.29
 -22   6   5   14.78    2.44
  22  -6  -5   15.83    2.63
  22  -6  -5   18.60    2.54
   6 -22  -5  262.88    6.70
   6 -22  -5  231.77    6.14
  -7  23   6   54.88    4.06
  -7  23   6   68.77    4.39
 -23   7   6   98.97    4.77
  23  -7  -6   93.71    4.99
  23  -7  -6  102.53    4.86
   7 -23  -6   68.13    4.40
   7 -23  -6   60.17    4.14
  -8  24   7   66.33    5.20
  -8  24   7   82.72    5.13
 -24   8   7   33.45    3.84
  24  -8  -7   29.13    3.78
  24  -8  -7   27.11    3.69
   8 -24  -7   75.94    5.36
   8 -24  -7   65.15    5.20
  -9  25   8   50.40    4.97
  -9  25   8   63.24    5.29
 -25   9   8   66.60    5.66
  25  -9  -8   55.65    5.28
  25  -9  -8   69.68    5.78
   9 -25  -8   54.86    5.58
   9 -25  -8   55.59    5.58
 -10  26   9   12.73    3.77
 -26  10   9    4.40    3.78
  26 -10  -9    4.57    3.89
  26 -10  -9    1.21    3.67
  10 -26  -9    9.84    3.55
  10 -26  -9   12.83    3.73
  10   8 -10   53.30    5.50
  10   8 -10   65.23    6.42
  -8 -10 -10    7.05    3.50
   9   9  -9   15.43    3.20
   9   9  -9   19.09    3.61
  -9  -9  -9    1.90    2.81
  -9  -9   9   21.14    3.53
   8  10  -8   80.82    4.73
   8  10  -8   88.81    5.09
 -10  -8  -8  131.71    5.58
  10   8   8  152.41    6.48
  -8 -10   8   92.23    4.92
   7  11  -7   56.96    4.29
   7  11  -7   64.33    4.60
 -11  -7  -7    2.77    2.13
  11   7   7    2.15    2.65
  -7 -11   7   67.88    4.21
   6  12  -6   10.38    2.25
   6  12  -6   10.89    2.27
 -12  -6  -6  114.04    4.10
  12   6   6  128.47    5.11
  -6 -12   6   11.39    2.07
   5  13  -5   26.56    2.85
   5  13  -5   29.97    3.09
 -13  -5  -5  230.91    4.85
 -13  -5  -5  218.85    4.67
  13   5   5  225.47    3.86
  13   5   5  232.35    5.67
  -5 -13   5   29.70    2.54
   4  14  -4  206.99    5.28
   4  14  -4  233.30    5.09
 -14  -4  -4    1.54    1.03
 -14  -4  -4    1.32    1.14
  14   4   4    2.31    1.05
  14   4   4    1.79    1.56
  -4 -14   4  259.49    4.20
   3  15  -3  263.20    5.54
   3  15  -3  285.96    5.07
 -15  -3  -3   38.83    1.72
  15   3   3   36.98    1.77
  15   3   3   34.36    2.52
  -3 -15   3  302.59    3.63
   2  16  -2   28.34    2.41
   2  16  -2   25.79    2.07
 -16  -2  -2  102.99    1.76
  16   2   2   99.28    2.41
   1  17  -1   63.58    2.94
   1  17  -1   49.50    2.30
  17   1   1   82.62    2.43
   0  18   0  235.66    4.92
   0  18   0  113.76    3.07
 -18   0   0  148.97    1.41
  18   0   0  256.63    4.21
  -1  19   1   60.23    3.20
  -1  19   1   26.06    1.91
 -19   1   1  182.41    2.47
  19  -1  -1  277.37    4.85
  19  -1  -1  191.21    2.55
   1 -19  -1   58.36    3.19
  -2  20   2    9.08    1.84
  -2  20   2    4.08    1.17
  -2  20   2    8.23    1.26
 -20   2   2  563.47    5.40
  20  -2  -2  646.42    7.88
  20  -2  -2  583.45    5.50
   2 -20  -2    7.41    1.82
  -3  21   3   87.62    3.43
  -3  21   3  151.37    3.83
 -21   3   3  375.74    5.36
  21  -3  -3  380.71    6.70
  21  -3  -3  386.38    5.43
   3 -21  -3  135.45    4.49
   3 -21  -3   95.66    3.62
  -4  22   4  247.46    5.75
  -4  22   4  354.05    6.15
 -22   4   4  348.06    5.92
  22  -4  -4  333.15    6.88
  22  -4  -4  362.68    6.04
   4 -22  -4  324.99    6.97
   4 -22  -4  255.57    5.85
  -5  23   5   79.59    4.01
  -5  23   5  108.63    4.44
 -23   5   5  219.13    5.54
  23  -5  -5  200.70    6.06
  23  -5  -5  222.11    5.60
   5 -23  -5   94.17    4.57
   5 -23  -5   80.34    4.03
  -6  24   6  145.77    5.48
  -6  24   6  179.45    5.82
 -24   6   6    0.10    2.07
  24  -6  -6    0.72    2.38
  24  -6  -6    0.18    2.19
   6 -24  -6  164.95    5.94
   6 -24  -6  143.01    5.43
  -7  25   7   83.11    5.05
  -7  25   7  108.47    5.54
 -25   7   7   44.36    4.56
  25  -7  -7   38.92    4.59
  25  -7  -7   47.42    4.69
   7 -25  -7   97.03    5.85
   7 -25  -7   84.38    5.06
  -8  26   8    3.24    3.28
  -8  26   8    2.97    3.10
 -26   8   8   11.11    3.57
  26  -8  -8    4.75    3.20
  26  -8  -8    9.17    3.57
   8 -26  -8    2.73    3.39
   8 -26  -8    3.51    3.25
  -9  27   9   55.94    5.62
 -27   9   9   27.37    4.55
  27  -9  -9   30.09    4.90
  27  -9  -9   27.02    4.51
   9 -27  -9   60.73    6.25
   9 -27  -9   62.43    6.32
  11   9 -10   23.71    4.21
  11   9 -10   37.14    5.02
  -9 -11 -10   48.16    5.66
   9  11  10   43.69    4.87
  10  10  -9   -1.58    2.50
  10  10  -9    1.34    3.20
 -10 -10  -9    3.18    2.87
   9  11  -8    2.88    2.48
   9  11  -8    2.25    2.53
 -11  -9  -8    5.60    2.65
  11   9   8    2.43    3.02
  -9 -11   8    3.65    2.57
   8  12  -7   89.64    4.74
   8  12  -7  108.77    4.97
 -12  -8  -7   46.26    3.71
  12   8   7   46.75    4.54
  -8 -12   7  111.69    4.73
   7  13  -6   31.44    3.34
   7  13  -6   35.13    3.70
 -13  -7  -6   38.89    3.20
  13   7   6   36.07    3.83
  -7 -13   6   37.48    3.17
   6  14  -5   34.84    3.20
   6  14  -5   33.60    3.20
 -14  -6  -5   41.13    2.70
  14   6   5   45.47    3.60
  -6 -14   5   40.28    2.72
   5  15  -4    0.79    1.83
   5  15  -4    1.35    1.50
 -15  -5  -4  148.99    3.40
  15   5   4  149.75    3.19
  15   5   4  152.15    4.59
  -5 -15   4    0.23    1.09
   4  16  -3  119.06    4.32
   4  16  -3  131.37    3.76
 -16  -4  -3   15.94    1.47
  16   4   3   17.35    1.71
  -4 -16   3  132.69    2.47
   3  17  -2   10.60    2.03
   3  17  -2    7.96    1.48
 -17  -3  -2    6.97    0.68
  17   3   2    5.67    1.18
   2  18  -1   77.11    3.55
   2  18  -1   61.24    2.55
  18   2   1  125.37    3.12
   1  19   0  207.86    4.90
   1  19   0  110.87    3.21
  19   1   0  166.74    3.80
   0  20   1   14.82    2.06
   0  20   1    6.65    1.33
   0  20   1   19.01    1.41
 -20   0   1   11.38    0.91
  20   0  -1   18.14    2.24
  20   0  -1   10.79    0.97
   0 -20  -1   16.07    2.10
  -1  21   2  240.92    5.67
  -1  21   2  114.27    3.45
  -1  21   2  279.40    4.17
 -21   1   2   54.85    2.07
  21  -1  -2   61.01    3.29
  21  -1  -2   57.47    2.08
   1 -21  -2  236.00    5.66
  -2  22   3   28.39    2.49
  -2  22   3   49.11    2.72
 -22   2   3    4.92    1.41
  22  -2  -3    6.81    2.18
  22  -2  -3    5.81    1.44
   2 -22  -3   48.16    3.73
   2 -22  -3   31.72    2.71
  -3  23   4   56.64    3.47
  -3  23   4   85.83    3.60
 -23   3   4  220.10    4.95
  23  -3  -4  225.52    6.21
  23  -3  -4  223.57    4.99
   3 -23  -4   78.67    4.48
   3 -23  -4   65.68    3.67
  -4  24   5    2.36    2.11
  -4  24   5    3.39    1.96
 -24   4   5    6.65    2.16
  24  -4  -5    4.40    2.36
  24  -4  -5    5.22    2.07
   4 -24  -5    3.84    2.57
   4 -24  -5    3.38    2.18
  -5  25   6   12.24    2.80
  -5  25   6   18.69    2.77
 -25   5   6    5.42    2.46
  25  -5  -6    3.99    2.90
  25  -5  -6    4.78    2.48
   5 -25  -6   12.03    2.92
   5 -25  -6   12.36    2.79
  -6  26   7   27.43    3.68
  -6  26   7   37.55    4.44
 -26   6   7   48.94    4.64
  26  -6  -7   44.88    4.83
  26  -6  -7   55.00    4.82
   6 -26  -7   34.52    4.16
   6 -26  -7   28.41    3.72
  -7  27   8   12.50    3.31
  -7  27   8   14.71    4.28
 -27   7   8   16.81    3.70
  27  -7  -8   19.52    4.27
  27  -7  -8   18.79    3.77
   7 -27  -8   15.71    3.59
   7 -27  -8    8.35    3.12
  -8  28   9   20.69    4.43
 -28   8   9   10.85    3.95
  28  -8  -9    7.96    4.25
  28  -8  -9   15.21    4.21
   8 -28  -9   22.12    4.52
   8 -28  -9   19.31    4.31
  12  10 -10    2.29    3.02
  12  10 -10    3.43    3.68
  10  12  10    0.64    3.70
  11  11  -9    3.64    3.26
  11  11  -9    4.79    3.50
 -11 -11  -9   18.54    3.75
  11  11   9   20.08    3.53
  10  12  -8    7.77    3.05
  10  12  -8    8.89    3.23
 -12 -10  -8    8.49    2.70
  12  10   8    8.85    3.32
   9  13  -7  186.48    6.66
   9  13  -7  231.74    6.88
 -13  -9  -7   58.41    4.08
  13   9   7   70.78    4.97
   8  14  -6   11.96    2.84
   8  14  -6   13.41    2.64
 -14  -8  -6  173.94    4.76
  14   8   6  195.03    6.00
   7  15  -5   57.78    4.13
   7  15  -5   62.10    3.73
 -15  -7  -5  229.74    4.75
  15   7   5  246.20    5.95
   6  16  -4   77.07    3.93
   6  16  -4   87.90    3.66
 -16  -6  -4    3.87    1.24
  16   6   4    4.48    1.40
  16   6   4    3.56    1.82
  -6 -16   4   93.19    2.82
   5  17  -3  153.48    4.79
   5  17  -3  168.44    4.24
  17   5   3  330.70    4.61
  -5 -17   3  154.78    2.58
   4  18  -2   55.21    3.28
   4  18  -2   49.91    2.73
  18   4   2  801.32    7.01
   3  19  -1  182.24    4.87
   3  19  -1  141.18    3.64
  19   3   1   -0.14    1.21
   2  20   0  288.38    5.92
   2  20   0  166.86    3.88
  20   2   0  512.06    6.47
   1  21   1  373.80    6.73
   1  21   1  179.01    4.03
   1  21   1  444.64    3.88
  21   1  -1    1.93    1.53
  -1 -21  -1  373.64    6.73
   0  22   2  110.33    4.25
   0  22   2   49.88    2.62
   0  22   2  129.03    3.02
 -22   0   2  104.11    2.64
  22   0  -2  114.01    4.17
  22   0  -2  104.66    2.53
   0 -22  -2  109.58    4.26
  -1  23   3  335.56    7.05
  -1  23   3  190.69    4.75
  -1  23   3  372.62    5.55
 -23   1   3   29.17    2.26
  23  -1  -3   25.47    2.99
  23  -1  -3   29.76    2.34
   1 -23  -3  339.79    7.14
  -2  24   4  214.92    5.48
  -2  24   4  345.20    6.18
 -24   2   4   48.76    3.06
  24  -2  -4   46.47    3.73
  24  -2  -4   50.38    3.11
   2 -24  -4  318.48    7.33
   2 -24  -4  230.13    5.69
  -3  25   5    6.35    2.25
  -3  25   5    5.36    2.12
 -25   3   5   33.50    3.42
  25  -3  -5   36.39    3.86
  25  -3  -5   32.81    3.48
   3 -25  -5    4.43    2.75
   3 -25  -5    5.49    2.30
  -4  26   6   -0.02    2.37
  -4  26   6    2.40    2.35
 -26   4   6  160.38    5.57
  26  -4  -6  159.36    6.73
  26  -4  -6  166.34    5.67
   4 -26  -6    1.16    2.53
   4 -26  -6    2.47    2.49
  -5  27   7   71.25    5.28
  -5  27   7   84.45    5.53
 -27   5   7   -0.17    2.66
  27  -5  -7    0.03    2.83
  27  -5  -7   -1.90    2.57
   5 -27  -7   80.08    5.85
   5 -27  -7   68.86    5.23
  -6  28   8    5.02    3.34
 -28   6   8  266.23    8.25
  28  -6  -8  244.49    8.62
  28  -6  -8  277.23    8.42
   6 -28  -8    7.88    3.69
   6 -28  -8    9.08    3.48
  -7  29   9    2.40    3.53
  29  -7  -9    8.81    4.39
  29  -7  -9    8.38    3.96
   7 -29  -9    2.43    3.95
   7 -29  -9    1.18    3.45
  13  11 -10   16.70    4.24
  13  11 -10   20.82    4.56
  12  12  -9   15.00    3.87
  12  12  -9   16.17    3.64
  11  13  -8   82.94    5.81
  11  13  -8  103.57    5.50
  13  11   8   18.61    3.61
  10  14  -7   26.94    3.72
  10  14  -7   32.96    3.76
  14  10   7   -0.56    2.66
   9  15  -6   34.69    3.80
   9  15  -6   36.14    3.86
  15   9   6   21.67    3.07
   8  16  -5    3.35    2.40
   8  16  -5    1.66    1.99
  16   8   5   17.06    2.56
   7  17  -4    1.98    2.22
   7  17  -4    0.35    1.67
  17   7   4   86.20    3.91
  17   7   4   80.82    3.97
   6  18  -3   15.78    2.62
   6  18  -3   19.93    2.41
  18   6   3  393.67    5.34
   5  19  -2   29.26    3.04
   5  19  -2   28.74    2.51
  19   5   2    7.40    1.53
   4  20  -1   19.63    2.45
   4  20  -1   18.43    2.23
  20   4   1  102.29    3.38
   3  21   0  180.49    5.11
   3  21   0  116.21    3.52
  21   3   0    1.82    1.49
   2  22   1    0.19    2.05
   2  22   1   -1.41    1.16
  22   2  -1    1.29    1.68
   1  23   2  171.89    5.44
   1  23   2   80.61    3.29
   1  23   2  204.21    3.70
  23   1  -2    0.87    1.81
  -1 -23  -2  175.81    5.52
   0  24   3   42.91    3.95
   0  24   3   20.55    2.37
   0  24   3   49.07    2.71
  24   0  -3   47.80    3.89
   0 -24  -3   46.00    4.06
  -1  25   4   73.59    4.68
  -1  25   4   43.82    3.22
  -1  25   4   76.94    3.65
  25  -1  -4    5.51    2.36
   1 -25  -4   70.44    4.71
   1 -25  -4   53.61    3.52
  -2  26   5   58.16    3.96
  -2  26   5   85.23    4.38
  26  -2  -5   13.66    3.19
   2 -26  -5   80.60    5.20
   2 -26  -5   57.08    4.03
  -3  27   6   19.95    2.90
  -3  27   6   27.15    3.27
  27  -3  -6   14.70    3.58
   3 -27  -6   30.24    4.02
   3 -27  -6   20.83    2.99
  -4  28   7   25.12    3.44
  -4  28   7   35.26    5.04
  28  -4  -7   29.00    4.18
   4 -28  -7   37.27    4.50
   4 -28  -7   27.76    3.55
  -5  29   8   22.05    4.06
  29  -5  -8   34.67    4.72
   5 -29  -8   31.61    4.73
   5 -29  -8   24.41    4.18
  13  13  -9    0.31    3.40
  13  13  -9   -2.92    3.24
  12  14  -8  157.87    7.20
  12  14  -8  195.20    7.19
  14  12   8    0.91    3.00
  11  15  -7   14.31    3.19
  11  15  -7   18.03    3.18
  15  11   7   63.80    5.04
  10  16  -6    3.43    2.43
  10  16  -6    1.73    2.33
  16  10   6   -1.11    2.32
   9  17  -5  113.44    5.47
   9  17  -5  127.84    4.78
  17   9   5    3.79    2.22
   8  18  -4  179.28    6.08
   8  18  -4  201.19    5.14
  18   8   4    0.87    1.88
   7  19  -3   44.84    3.97
   7  19  -3   55.52    3.06
  19   7   3   30.35    2.63
   6  20  -2    2.96    2.05
   6  20  -2    0.59    1.47
  20   6   2    5.00    1.61
   5  21  -1   28.66    3.16
   5  21  -1   27.29    2.46
  21   5   1   59.95    2.99
   4  22   0  552.53    8.78
   4  22   0  352.99    5.61
  22   4   0    3.40    1.69
   3  23   1    9.10    2.52
   3  23   1    5.81    1.58
  23   3  -1  438.98    7.17
   2  24   2    1.73    2.08
   2  24   2    1.72    1.40
  24   2  -2   17.22    2.59
  -2 -24  -2    2.65    2.13
   1  25   3   12.36    2.88
   1  25   3    6.37    1.73
  25   1  -3   10.99    2.40
  -1 -25  -3   15.00    2.94
   0  26   4   41.73    3.94
   0  26   4   23.41    2.84
  26   0  -4   47.12    4.52
   0 -26  -4   43.00    4.01
   0 -26  -4   26.00    3.04
  -1  27   5   30.64    3.41
  27  -1  -5    0.06    2.50
   1 -27  -5   42.06    4.26
   1 -27  -5   30.99    3.56
  -2  28   6    3.26    2.46
  28  -2  -6    6.55    3.07
   2 -28  -6    8.98    3.04
   2 -28  -6    7.65    2.69
  -3  29   7   37.64    4.15
  29  -3  -7    9.38    3.88
   3 -29  -7   46.18    4.89
   3 -29  -7   38.19    4.20
  -4  30   8   64.11    5.85
  30  -4  -8    2.98    3.60
   4 -30  -8   83.01    6.68
   4 -30  -8   66.48    5.87
  14  14  -9   42.35    5.23
  14  14  -9   48.90    5.85
  13  15  -8   27.10    4.08
  13  15  -8   36.63    4.25
  15  13   8   37.11    4.40
  12  16  -7   -2.18    2.57
  12  16  -7   -0.16    2.57
  16  12   7    5.49    2.86
  11  17  -6    9.18    2.89
  11  17  -6    9.26    2.64
  17  11   6    2.09    2.43
  10  18  -5   37.71    4.03
  10  18  -5   42.81    3.65
  18  10   5   35.88    3.67
   9  19  -4   33.44    3.81
   9  19  -4   41.27    3.27
   8  20  -3   73.09    4.68
   8  20  -3   77.14    3.61
  20   8   3    4.08    1.79
   7  21  -2    8.18    2.40
   7  21  -2    8.23    1.79
  21   7   2   66.82    3.17
   6  22  -1  437.03    8.12
   6  22  -1  386.16    5.91
  22   6   1   20.55    2.31
   5  23   0   25.20    3.12
   5  23   0   16.97    2.07
  23   5   0  386.11    6.64
   4  24   1   46.96    4.12
   4  24   1   24.96    2.58
  24   4  -1    5.08    2.14
   3  25   2    1.61    2.22
   3  25   2    1.81    1.52
  25   3  -2  361.43    7.38
  -3 -25  -2    3.42    2.21
   2  26   3   59.71    4.63
   2  26   3   24.31    2.58
  26   2  -3   -0.03    2.06
  -2 -26  -3   57.96    4.64
   1  27   4    0.53    2.68
   1  27   4    0.45    1.63
  27   1  -4   38.44    4.06
  -1 -27  -4    0.69    2.66
   0  28   5  141.14    6.37
   0  28   5   92.90    4.54
  28   0  -5  141.35    6.61
   0 -28  -5  145.41    6.49
   0 -28  -5   92.95    4.66
  -1  29   6    1.83    2.32
  29  -1  -6    5.35    3.16
   1 -29  -6   -0.46    3.21
   1 -29  -6    0.46    2.40
  -2  30   7   13.21    3.19
  30  -2  -7   22.11    4.49
   2 -30  -7   19.42    4.17
   2 -30  -7   18.97    3.47
  -3  31   8    1.08    3.13
  31  -3  -8    6.66    4.22
   3 -31  -8    0.88    3.83
   3 -31  -8   -1.04    3.07
  15  15  -9   14.61    3.95
  14  16  -8    5.70    3.30
  13  17  -7   24.68    3.88
  13  17  -7   30.44    4.35
  17  13   7   41.12    5.14
  12  18  -6    2.83    2.74
  12  18  -6    3.10    2.52
  18  12   6   14.46    2.99
  11  19  -5   62.61    4.74
  11  19  -5   67.97    4.06
  19  11   5   10.91    2.58
  10  20  -4    1.62    2.45
  10  20  -4    3.45    2.03
   9  21  -3  187.73    6.51
   9  21  -3  201.73    5.03
   8  22  -2  101.21    4.89
   8  22  -2  103.68    3.73
  22   8   2   60.07    3.53
   7  23  -1  259.73    6.80
   7  23  -1  233.94    5.08
  23   7   1   16.45    2.37
   6  24   0   31.62    3.63
   6  24   0   24.11    2.62
  24   6   0   13.52    2.35
   5  25   1    5.22    2.50
   5  25   1    2.31    1.67
  25   5  -1    0.77    2.11
   4  26   2   13.74    2.83
   4  26   2    8.26    1.88
  26   4  -2  313.41    7.24
   3  27   3   12.99    3.16
   3  27   3    7.30    1.92
  27   3  -3   10.49    2.68
  -3 -27  -3   16.18    3.28
   2  28   4   -2.35    2.68
   2  28   4    0.34    1.93
  28   2  -4   33.63    4.02
  -2 -28  -4    2.76    2.85
   1  29   5    5.63    3.29
   1  29   5    4.63    3.66
  29   1  -5    7.74    3.11
  -1 -29  -5    6.01    3.30
   0  30   6    4.02    3.45
  30   0  -6    4.15    3.26
   0 -30  -6    4.62    3.50
  -1  31   7   25.28    4.24
  31  -1  -7   10.57    4.28
   1 -31  -7   17.13    4.13
  32  -2  -8   39.13    5.21
   2 -32  -8    3.10    3.96
  15  17  -8   13.03    3.79
  14  18  -7   42.40    5.16
  13  19  -6    0.89    2.83
  12  20  -5   49.22    4.70
  11  21  -4   13.17    3.08
  10  22  -3    0.11    2.48
   9  23  -2  369.92    8.29
  23   9   2   76.76    4.01
   8  24  -1    1.85    2.46
  24   8   1  174.97    5.15
   7  25   0   28.05    3.38
  25   7   0   51.17    3.79
   6  26   1    3.60    2.89
  26   6  -1    1.21    2.34
   5  27   2   11.63    2.92
  27   5  -2   61.95    4.19
   4  28   3   12.36    3.05
  28   4  -3  223.88    7.06
  -4 -28  -3   17.05    3.13
   3  29   4    5.99    2.86
  29   3  -4    4.58    3.12
  -3 -29  -4    8.10    2.99
   2  30   5   10.87    3.64
  30   2  -5    9.24    3.59
  -2 -30  -5    7.59    3.58
   1  31   6  129.04    7.04
  31   1  -6   74.50    6.02
  -1 -31  -6  130.43    7.07
   0  32   7    1.96    3.69
  32   0  -7    3.94    3.71
   0 -32  -7    3.64    3.81
  16  18  -8    3.33    3.52
  15  19  -7   18.40    4.31
  14  20  -6  176.31    7.30
  13  21  -5   57.88    5.62
  12  22  -4   16.13    3.70
  11  23  -3   12.47    3.40
  10  24  -2    2.00    2.63
   9  25  -1   14.18    3.38
  25   9   1    9.60    2.50
   8  26   0   46.05    4.91
  26   8   0   43.45    3.94
   7  27   1   51.16    4.98
  27   7  -1   93.42    4.94
   6  28   2   76.12    4.99
  28   6  -2   43.66    4.57
   5  29   3    0.08    2.71
  29   5  -3    0.36    2.81
   4  30   4   73.91    5.81
  30   4  -4   73.01    5.83
  -4 -30  -4   72.26    5.79
   3  31   5   28.76    4.23
  31   3  -5   27.84    4.16
  -3 -31  -5   31.01    4.34
   2  32   6    7.85    3.86
  32   2  -6   43.41    4.99
  -2 -32  -6    5.07    3.80
   1  33   7   20.05    4.64
  33   1  -7   65.36    7.24
  -1 -33  -7   22.36    4.69
  16  20  -7    2.93    3.88
  15  21  -6   37.27    4.63
  14  22  -5   44.78    5.09
  13  23  -4   29.72    4.38
  12  24  -3  109.49    5.88
  11  25  -2    1.26    2.78
  10  26  -1   45.09    5.16
  26  10   1   27.71    3.28
   9  27   0   -0.02    2.67
  27   9   0   35.23    4.03
   8  28   1   85.35    5.33
  28   8  -1    6.35    2.83
   7  29   2   45.33    4.63
  29   7  -2   18.85    3.37
   6  30   3   17.65    3.52
  30   6  -3    4.97    2.90
   5  31   4    3.31    3.09
  31   5  -4   97.65    6.40
  -5 -31  -4    1.33    2.92
   4  32   5  155.33    7.47
  32   4  -5    0.47    3.22
  -4 -32  -5  152.10    7.38
   3  33   6    1.18    3.61
  33   3  -6   32.40    5.07
  -3 -33  -6    7.47    3.85
  17  21  -7   34.18    5.30
  16  22  -6    7.43    3.67
  15  23  -5    3.15    3.72
  14  24  -4    0.46    3.51
  13  25  -3   17.30    3.99
  12  26  -2   -0.11    3.31
  11  27  -1   28.21    3.93
  10  28   0   13.54    3.38
  28  10   0  106.29    5.36
   9  29   1  154.42    7.01
  29   9  -1    3.33    2.89
   8  30   2    0.37    2.96
  30   8  -2    0.47    3.00
   7  31   3    9.92    3.37
  31   7  -3   15.59    3.86
   6  32   4    3.03    3.24
  32   6  -4   10.07    3.46
   5  33   5   13.50    4.04
  33   5  -5   13.42    3.92
  -5 -33  -5   10.63    3.86
   4  34   6    5.27    4.04
  34   4  -6   38.82    5.16
  -4 -34  -6    2.01    3.96
  17  23  -6    3.01    4.09
  16  24  -5    1.18    3.77
  15  25  -4   20.03    4.10
  14  26  -3   45.21    5.35
  13  27  -2   42.45    5.01
  12  28  -1   42.06    5.10
  11  29   0   30.22    4.54
  29  11   0   74.28    5.97
  10  30   1   34.98    4.70
  30  10  -1    0.76    2.88
   9  31   2   61.27    6.05
  31   9  -2    6.19    3.32
   8  32   3    3.28    3.67
  32   8  -3   35.97    4.68
   7  33   4    1.46    3.25
  33   7  -4    7.27    3.90
   6  34   5    8.28    4.16
  34   6  -5   -1.08    3.90
  17  25  -5   14.70    4.52
  16  26  -4   -0.37    3.48
  15  27  -3    0.16    3.37
  14  28  -2   21.62    4.18
  13  29  -1   -0.53    3.66
  12  30   0   18.86    4.27
  11  31   1   30.92    4.67
  31  11  -1   -0.33    3.17
  10  32   2   -0.16    3.75
  32  10  -2   26.51    4.26
   9  33   3    6.71    3.98
  33   9  -3   13.55    4.20
   8  34   4   -1.87    3.71
  34   8  -4    6.09    4.11
  17  27  -4    7.65    4.47
  16  28  -3    4.01    3.76
  15  29  -2    4.05    3.71
  14  30  -1   53.39    5.75
  13  31   0    4.85    3.61
  12  32   1   10.13    3.78
  11  33   2   -2.89    3.80
  33  11  -2   32.16    4.76
  10  34   3   67.31    6.90
  34  10  -3    3.08    3.88
  17  29  -3   10.35    4.54
  16  30  -2   -0.30    4.14
  15  31  -1   -1.77    3.53
  14  32   0   13.69    4.51
  13  33   1   49.36    5.79
  12  34   2   -2.68    4.03
  34  12  -2   15.78    4.93
   1   0 -11   -0.01    3.24
   0  -1 -11   -0.26    3.24
   0   1 -10   36.85    4.56
  -1   0 -10   33.83    4.54
  -1   2  -9   39.33    3.67
  -1   2  -9   50.73    5.07
  -2   1  -9  158.00    5.42
  -2   1  -9  171.83    6.52
   2  -1   9  192.47    7.18
   1  -2   9   52.41    5.22
  -2   3  -8   18.31    2.41
  -2   3  -8   14.47    2.80
  -3   2  -8   10.75    2.08
  -3   2  -8    9.81    2.61
   3  -2   8    8.55    2.59
   2  -3   8   20.49    3.27
  -3   4  -7    0.98    1.41
  -3   4  -7    0.55    1.88
  -4   3  -7   21.21    2.47
  -4   3  -7   22.95    2.93
   4  -3   7   28.34    3.29
   3  -4   7    0.95    1.91
  -4   5  -6   11.04    1.54
  -4   5  -6   14.15    2.13
  -5   4  -6  145.57    3.50
  -5   4  -6  168.78    4.77
   5  -4   6  185.90    5.26
   4  -5   6   13.34    2.27
  -5   6  -5   74.35    2.43
  -5   6  -5   82.29    3.26
  -6   5  -5   67.04    2.26
  -6   5  -5   73.41    3.29
   6  -5   5   87.75    3.60
   5  -6   5   95.29    3.65
  -6   7  -4  140.76    2.70
  -6   7  -4  148.99    3.65
  -7   6  -4    3.11    0.80
  -7   6  -4    3.36    1.28
   7  -6   4    4.45    1.43
   6  -7   4  169.67    3.97
  -7   8  -3   38.50    1.37
  -7   8  -3   38.32    1.91
  -8   7  -3  103.40    1.78
  -8   7  -3  105.25    2.82
   8  -7   3  115.40    3.00
   7  -8   3   46.05    2.10
  -8   9  -2  209.62    2.54
  -8   9  -2  185.48    3.26
  -9   8  -2 1651.20    8.84
  -9   8  -2 1538.58    8.82
  -9  10  -1  348.85    4.21
 -10   9  -1   16.20    1.31
  10  -9   1   25.92    1.05
   9 -10   1  637.37    4.52
 -10  11   0    3.95    0.89
 -11  10   0   31.95    1.54
  11 -10   0   89.22    2.02
  10 -11   0    5.05    0.80
 -11  12   1  109.29    2.67
 -12  11   1    2.74    0.86
  12 -11  -1    5.35    1.01
  12 -11  -1    3.54    0.88
  11 -12  -1  185.09    3.31
  11 -12  -1  116.22    2.83
 -12  13   2  298.83    4.70
 -13  12   2 1252.48    9.28
  13 -12  -2 1539.31   10.28
  13 -12  -2 1322.40    9.53
  12 -13  -2  375.06    5.23
  12 -13  -2  309.14    4.79
 -13  14   3    0.46    1.14
 -14  13   3   31.70    2.22
  14 -13  -3   31.91    2.26
  14 -13  -3   35.64    2.30
  13 -14  -3    1.53    1.24
  13 -14  -3    0.08    1.14
 -14  15   4   17.64    2.27
 -15  14   4 1028.89   10.37
  15 -14  -4 1039.77   10.51
  15 -14  -4 1060.89   10.53
  14 -15  -4   15.29    2.08
  14 -15  -4   20.31    2.37
 -15  16   5   15.52    2.53
 -16  15   5   47.56    3.33
  16 -15  -5   47.65    3.34
  16 -15  -5   46.57    3.68
  15 -16  -5   12.08    2.24
  15 -16  -5   14.64    2.55
 -16  17   6  120.03    5.02
 -17  16   6   51.46    3.92
  17 -16  -6   47.41    3.80
  17 -16  -6   60.52    4.10
  16 -17  -6  111.30    4.87
  16 -17  -6  117.87    5.02
 -17  18   7   -0.27    2.42
 -18  17   7   13.88    3.01
  18 -17  -7   16.25    3.28
  18 -17  -7   16.18    3.32
  17 -18  -7   -0.25    2.65
  17 -18  -7   -1.19    2.45
 -18  19   8    0.95    3.21
 -18  19   8    1.93    2.92
 -19  18   8   61.39    5.70
 -19  18   8   57.60    4.82
  19 -18  -8   61.13    5.54
  19 -18  -8   62.70    5.21
  18 -19  -8    1.87    2.80
  18 -19  -8    4.70    3.38
 -19  20   9    1.27    3.76
 -20  19   9    8.18    3.57
  20 -19  -9    6.01    3.33
  20 -19  -9    5.99    3.52
  19 -20  -9   -1.33    3.00
  19 -20  -9    5.65    3.83
 -20  21  10   22.09    4.96
 -21  20  10    4.93    3.90
  21 -20 -10    6.03    4.14
  21 -20 -10    9.35    4.08
  20 -21 -10   21.68    4.31
  20 -21 -10   31.33    5.19
   2   1 -11   24.06    4.71
  -1  -2 -11   55.40    5.73
   1   2 -10   16.55    4.32
   1   2 -10   19.76    3.75
  -2  -1 -10    1.80    2.97
   0   3  -9   19.68    2.81
   0   3  -9   17.18    3.33
  -3   0  -9   17.23    3.25
   3   0   9   22.39    3.76
   0  -3   9   24.40    3.67
  -1   4  -8   49.26    3.41
  -1   4  -8   55.13    4.14
  -4   1  -8   23.62    2.73
  -4   1  -8   23.69    3.12
   4  -1   8   30.59    3.82
   1  -4   8   58.93    4.64
  -2   5  -7   32.99    2.68
  -2   5  -7   33.94    3.67
  -5   2  -7   34.77    2.51
  -5   2  -7   39.22    3.67
   5  -2   7   37.85    3.57
   2  -5   7   39.16    3.82
  -3   6  -6   39.58    2.40
  -3   6  -6   43.63    3.33
  -6   3  -6  168.06    3.66
  -6   3  -6  178.04    5.01
   6  -3   6  196.17    5.41
   3  -6   6   47.91    3.15
  -4   7  -5  266.25    4.36
  -4   7  -5  295.01    5.56
  -7   4  -5  366.11    4.40
  -7   4  -5  390.99    6.15
   7  -4   5  435.35    6.80
   4  -7   5  335.20    5.86
  -5   8  -4   73.20    2.20
  -5   8  -4   83.03    2.93
  -8   5  -4  494.85    4.13
  -8   5  -4  523.02    6.32
   8  -5   4  569.47    6.86
   5  -8   4   87.92    3.06
  -6   9  -3   99.51    2.18
  -6   9  -3  102.78    2.83
  -9   6  -3   61.20    1.23
  -9   6  -3   60.22    2.24
   9  -6   3   65.58    2.48
   6  -9   3  119.43    3.00
  -7  10  -2  857.04    5.59
  -7  10  -2  749.95    6.49
  -7  10  -2  947.39    7.12
 -10   7  -2  434.67    2.41
 -10   7  -2  409.23    4.51
  -8  11  -1  136.93    2.40
  -8  11  -1   77.27    2.20
 -11   8  -1    1.16    0.68
  11  -8   1    1.60    0.47
   8 -11   1  139.15    2.44
  -9  12   0   35.45    1.64
 -12   9   0   75.24    2.02
  12  -9   0  209.85    2.84
   9 -12   0  103.54    2.38
 -10  13   1  294.43    4.29
 -13  10   1    4.48    0.92
  13 -10  -1    8.33    1.10
  13 -10  -1    4.03    0.94
  10 -13  -1  539.26    5.62
  10 -13  -1  322.41    4.54
 -11  14   2    4.13    1.07
 -14  11   2  205.01    3.91
  14 -11  -2  237.34    4.20
  14 -11  -2  215.36    4.02
  11 -14  -2    5.48    1.21
  11 -14  -2    5.17    1.15
 -12  15   3   56.94    2.71
 -15  12   3  230.27    4.68
  15 -12  -3  236.97    4.75
  15 -12  -3  235.43    4.73
  12 -15  -3   64.60    2.86
  12 -15  -3   60.90    2.79
 -13  16   4   30.09    2.64
 -16  13   4   44.08    3.04
  16 -13  -4   38.69    2.81
  16 -13  -4   38.97    2.78
  13 -16  -4   30.58    2.64
  13 -16  -4   33.67    2.74
 -14  17   5  213.14    5.64
 -17  14   5   15.41    2.32
  17 -14  -5   16.33    2.54
  17 -14  -5   17.77    2.59
  14 -17  -5  214.66    5.65
  14 -17  -5  223.45    5.79
 -15  18   6  135.67    5.25
 -18  15   6   66.22    4.15
  18 -15  -6   69.31    4.19
  18 -15  -6   66.10    4.16
  15 -18  -6  129.54    5.13
  15 -18  -6  130.13    5.21
 -16  19   7    3.77    2.62
 -19  16   7   17.12    3.38
  19 -16  -7   14.62    2.98
  19 -16  -7   15.45    3.27
  16 -19  -7    9.76    3.03
  16 -19  -7    5.57    2.72
 -17  20   8   19.73    3.61
 -17  20   8   21.14    3.72
 -20  17   8   13.51    3.40
 -20  17   8   10.75    3.34
  20 -17  -8   10.73    3.21
  20 -17  -8   15.06    3.73
  17 -20  -8   23.05    3.98
  17 -20  -8   21.42    3.70
 -18  21   9  218.99    8.23
 -21  18   9   13.65    4.18
  21 -18  -9    9.46    3.54
  21 -18  -9   12.76    4.08
  18 -21  -9  210.98    7.90
  18 -21  -9  226.92    8.31
 -19  22  10    8.43    3.98
 -22  19  10    2.14    4.17
  22 -19 -10    3.32    3.61
  22 -19 -10    3.48    3.85
  19 -22 -10   13.24    4.03
  19 -22 -10    8.77    3.96
   3   2 -11    2.40    3.46
  -2  -3 -11   12.30    3.79
   2   3 -10   -0.91    2.39
   2   3 -10    0.78    3.41
  -3  -2 -10   21.44    3.76
   1   4  -9   82.05    4.51
   1   4  -9   99.54    5.51
  -4  -1  -9   88.03    5.23
   4   1   9   92.88    5.48
  -1  -4   9  106.07    5.86
   0   5  -8    9.14    2.07
   0   5  -8   10.86    2.69
  -5   0  -8   11.72    2.49
  -5   0  -8   12.93    2.95
   5   0   8   12.38    2.78
   0  -5   8   10.46    2.70
  -1   6  -7   93.37    3.74
  -1   6  -7  110.84    4.89
  -6   1  -7  345.90    5.61
  -6   1  -7  355.25    7.33
   6  -1   7  392.21    7.75
   1  -6   7  118.55    4.95
  -2   7  -6    1.72    1.35
  -2   7  -6    1.32    1.84
  -7   2  -6  141.16    3.32
  -7   2  -6  149.60    4.48
   7  -2   6  161.48    4.89
   2  -7   6    1.91    1.77
  -3   8  -5   10.48    1.45
  -3   8  -5   12.52    1.84
  -8   3  -5  119.38    2.55
  -8   3  -5  124.13    3.84
   8  -3   5  135.72    4.30
   3  -8   5   12.92    1.75
  -4   9  -4  142.47    3.15
  -4   9  -4  154.64    3.92
  -9   4  -4  136.52    2.12
  -9   4  -4  138.38    3.41
   9  -4   4  150.65    3.85
   4  -9   4  173.85    3.88
  -5  10  -3  487.57    4.96
  -5  10  -3  496.71    5.94
 -10   5  -3  550.20    2.63
 -10   5  -3  539.42    5.63
  10  -5   3  557.38    6.34
   5 -10   3  572.11    5.81
  -6  11  -2   81.21    2.10
  -6  11  -2   70.83    2.38
  -6  11  -2   88.79    2.25
 -11   6  -2   33.79    1.53
  -7  12  -1   57.46    1.89
  -7  12  -1   31.57    1.68
 -12   7  -1   34.95    1.43
  12  -7   1   63.33    1.24
   7 -12   1   53.67    1.84
  -8  13   0  266.22    3.99
 -13   8   0   58.97    1.76
  13  -8   0  153.78    2.47
   8 -13   0  743.55    6.16
  -9  14   1  115.36    2.91
 -14   9   1  334.01    4.22
  14  -9  -1  514.39    5.22
  14  -9  -1  350.50    4.33
   9 -14  -1  237.05    3.95
 -10  15   2  360.98    5.34
 -15  10   2    1.84    0.89
  15 -10  -2    1.25    0.97
  15 -10  -2    3.47    1.07
  10 -15  -2  484.43    6.11
  10 -15  -2  375.06    5.41
 -16  11   3  164.88    4.02
  16 -11  -3  170.23    4.13
  16 -11  -3  168.57    4.09
  11 -16  -3   44.26    2.59
  11 -16  -3   39.58    2.68
 -12  17   4  117.04    4.03
 -17  12   4   12.11    1.97
  17 -12  -4    9.77    1.87
  17 -12  -4   10.86    1.84
  12 -17  -4  118.49    4.24
  12 -17  -4  112.31    3.97
 -13  18   5   28.39    3.08
 -18  13   5  216.83    5.75
  18 -13  -5  220.09    5.92
  18 -13  -5  219.28    5.80
  13 -18  -5   25.98    3.03
  13 -18  -5   26.76    3.11
 -14  19   6   71.39    4.64
 -19  14   6   26.98    3.27
  19 -14  -6   27.36    3.30
  19 -14  -6   29.68    3.33
  14 -19  -6   73.84    4.65
  14 -19  -6   71.76    4.39
 -15  20   7   16.12    3.13
 -15  20   7   12.59    2.95
 -20  15   7  120.33    5.95
  20 -15  -7  116.61    5.48
  20 -15  -7  128.04    6.03
  15 -20  -7   17.85    3.10
  15 -20  -7   16.10    3.41
 -16  21   8   10.85    3.29
 -16  21   8    8.47    2.95
 -21  16   8   42.48    4.85
  21 -16  -8   39.81    4.69
  21 -16  -8   41.75    4.81
  16 -21  -8   12.30    3.20
  16 -21  -8   10.24    3.26
 -17  22   9   38.96    4.69
 -22  17   9    4.97    3.89
  22 -17  -9    5.06    3.79
  22 -17  -9    8.11    4.00
  17 -22  -9   31.30    4.36
  17 -22  -9   35.81    4.63
 -18  23  10  104.69    7.84
 -23  18  10    5.25    4.31
  23 -18 -10    1.71    3.56
  23 -18 -10    3.44    4.15
  18 -23 -10   97.04    6.75
  18 -23 -10  122.10    8.10
   4   3 -11    6.07    3.65
  -3  -4 -11  101.06    7.14
   3   4 -10   35.32    4.22
   3   4 -10   46.20    5.09
  -4  -3 -10  167.29    7.36
   2   5  -9   47.86    4.02
   2   5  -9   60.18    4.86
  -5  -2  -9  133.88    6.26
   5   2   9  137.57    6.22
  -2  -5   9   75.48    5.40
   1   6  -8   15.43    2.49
   1   6  -8   17.59    3.24
  -6  -1  -8  120.43    5.17
   6   1   8  144.92    5.77
  -1  -6   8   20.83    3.15
   0   7  -7    4.99    1.77
   0   7  -7    7.25    2.28
  -7   0  -7    7.89    1.62
  -7   0  -7    5.32    2.28
   7   0   7    8.06    2.61
   0  -7   7    6.69    2.36
  -1   8  -6   81.73    3.32
  -1   8  -6   94.42    4.18
  -8   1  -6   34.50    2.06
  -8   1  -6   33.92    3.04
   8  -1   6   38.66    3.18
   1  -8   6   98.03    4.05
  -2   9  -5  154.10    3.71
  -2   9  -5  173.84    4.52
  -9   2  -5    2.19    0.87
  -9   2  -5    1.74    1.39
   9  -2   5    2.03    1.54
   2  -9   5  187.26    4.35
  -3  10  -4   40.31    2.07
  -3  10  -4   43.01    2.58
 -10   3  -4  913.99    4.82
 -10   3  -4  890.58    8.02
  10  -3   4  924.19    8.90
   3 -10   4   47.36    2.43
  -4  11  -3 1259.59    8.47
  -4  11  -3 1295.29    9.57
 -11   4  -3    5.59    1.05
  11  -4   3    6.27    1.38
   4 -11   3 1512.35    9.10
  -5  12  -2    2.46    0.87
  -5  12  -2    1.59    0.91
  -5  12  -2    2.08    0.75
 -12   5  -2   37.45    1.53
  -6  13  -1    0.48    0.77
  -6  13  -1    0.88    0.87
 -13   6  -1   16.80    1.15
  13  -6   1   28.18    0.93
   6 -13   1    1.19    0.80
  -7  14   0   59.67    2.13
 -14   7   0   66.06    1.80
  14  -7   0  166.57    2.60
   7 -14   0  162.44    3.19
  -8  15   1    7.36    1.08
 -15   8   1   22.61    1.36
  15  -8  -1   34.05    1.75
  15  -8  -1   23.16    1.43
   8 -15  -1   18.07    1.64
  -9  16   2   21.11    1.91
 -16   9   2  242.63    4.09
  16  -9  -2  279.88    4.61
  16  -9  -2  257.80    4.22
   9 -16  -2   31.32    2.13
   9 -16  -2   22.70    2.02
 -10  17   3   45.41    2.58
 -17  10   3   31.19    2.30
  17 -10  -3   34.22    2.37
  17 -10  -3   31.76    2.35
  10 -17  -3   52.80    2.81
  10 -17  -3   47.40    2.66
 -11  18   4   30.25    2.96
 -18  11   4  111.37    3.76
  18 -11  -4  110.92    4.16
  18 -11  -4  115.29    3.86
  11 -18  -4   30.61    3.04
  11 -18  -4   30.16    3.01
 -12  19   5  429.63    7.92
 -19  12   5    5.04    1.92
  19 -12  -5    4.22    1.95
  19 -12  -5    3.39    1.88
  12 -19  -5  456.13    8.09
  12 -19  -5  435.67    7.82
 -13  20   6   33.45    3.56
 -20  13   6   40.75    4.09
  20 -13  -6   29.67    3.50
  20 -13  -6   38.79    4.07
  13 -20  -6   36.39    3.68
  13 -20  -6   32.03    3.56
 -14  21   7    5.75    2.96
 -14  21   7    2.56    2.37
 -21  14   7   30.51    3.61
  21 -14  -7   31.90    3.68
  21 -14  -7   32.81    4.07
  14 -21  -7    1.48    2.76
  14 -21  -7    0.44    2.51
 -15  22   8   50.07    5.59
 -15  22   8   49.66    5.19
 -22  15   8   48.64    5.01
  22 -15  -8   44.26    5.41
  22 -15  -8   55.89    5.12
  15 -22  -8   42.58    4.72
  15 -22  -8   45.56    5.49
 -16  23   9   38.61    4.71
 -23  16   9  188.42    8.30
  23 -16  -9  170.13    7.51
  23 -16  -9  176.98    8.11
  16 -23  -9   46.24    5.11
  16 -23  -9   38.24    4.72
 -17  24  10    3.82    4.26
 -24  17  10    4.61    3.87
  24 -17 -10    6.61    4.24
  24 -17 -10    8.14    4.01
  17 -24 -10    1.19    3.50
  17 -24 -10    2.94    4.23
   5   4 -11   -0.34    2.87
   5   4 -11   -3.69    3.23
  -4  -5 -11   40.74    4.87
   4   5 -10   58.42    4.78
   4   5 -10   63.84    5.50
  -5  -4 -10   64.60    5.86
   3   6  -9   10.09    2.71
   3   6  -9   18.36    3.72
  -6  -3  -9  106.61    5.89
   6   3   9  119.67    6.43
  -3  -6   9   18.73    3.16
   2   7  -8   13.36    2.53
   2   7  -8   12.20    2.85
  -7  -2  -8   -2.62    2.31
   7   2   8    0.60    2.78
  -2  -7   8   16.84    3.02
   1   8  -7   40.96    3.22
   1   8  -7   47.12    4.05
  -8  -1  -7    8.63    2.35
   8   1   7    7.95    2.38
  -1  -8   7   49.37    3.81
   0   9  -6   68.46    3.30
   0   9  -6   70.38    3.66
  -9   0  -6   75.00    2.59
  -9   0  -6   78.06    3.48
   9   0   6   78.99    4.22
   0  -9   6   81.85    3.76
  -1  10  -5   33.33    2.41
  -1  10  -5   35.88    2.92
 -10   1  -5   53.07    1.88
 -10   1  -5   50.98    2.81
  10  -1   5   57.49    3.41
   1 -10   5   41.26    2.75
  -2  11  -4   29.36    2.07
  -2  11  -4   33.44    2.30
 -11   2  -4    7.13    0.73
 -11   2  -4    5.62    1.24
  11  -2   4    5.94    1.51
   2 -11   4   35.02    2.18
  -3  12  -3  512.26    5.87
  -3  12  -3  529.58    6.31
 -12   3  -3   11.70    1.46
  12  -3   3   12.35    1.50
   3 -12   3  609.46    5.73
  -4  13  -2  178.60    3.41
  -4  13  -2  153.75    3.39
  -4  13  -2  217.30    3.11
 -13   4  -2   79.30    1.99
  -5  14  -1  470.72    5.38
  -5  14  -1  283.81    4.30
 -14   5  -1  143.74    2.34
  14  -5   1  226.08    2.33
   5 -14   1  464.70    5.34
  -6  15   0  115.98    2.93
  -6  15   0   43.97    1.95
 -15   6   0  292.04    3.33
  15  -6   0  731.08    5.40
   6 -15   0  121.26    2.99
  -7  16   1  128.70    3.10
 -16   7   1   52.30    1.80
  16  -7  -1   81.73    2.44
  16  -7  -1   56.14    1.89
   7 -16  -1  273.35    4.57
  -8  17   2    9.38    1.47
 -17   8   2  114.22    2.89
  17  -8  -2  127.39    3.32
  17  -8  -2  116.29    2.94
   8 -17  -2   12.51    1.74
   8 -17  -2   10.98    1.57
  -9  18   3  217.07    4.85
 -18   9   3   24.35    2.18
  18  -9  -3   26.75    2.31
  18  -9  -3   25.39    2.26
   9 -18  -3  261.80    5.28
   9 -18  -3  223.53    4.84
 -10  19   4  504.55    7.69
 -19  10   4   30.75    2.75
  19 -10  -4   26.12    2.70
  19 -10  -4   29.83    2.55
  10 -19  -4  587.40    8.30
  10 -19  -4  537.72    7.93
 -11  20   5   59.57    3.73
 -20  11   5   15.58    2.31
  20 -11  -5   17.62    2.58
  20 -11  -5   16.44    2.35
  11 -20  -5   69.21    4.22
  11 -20  -5   61.39    3.77
 -12  21   6  268.88    6.97
 -21  12   6   14.15    2.84
  21 -12  -6   11.06    2.61
  21 -12  -6   10.32    2.75
  12 -21  -6  309.08    7.33
  12 -21  -6  281.85    7.14
 -13  22   7  220.39    7.34
 -13  22   7  217.87    6.98
 -22  13   7   58.33    4.99
  22 -13  -7   57.45    4.57
  22 -13  -7   68.74    5.21
  13 -22  -7  210.61    6.79
  13 -22  -7  212.96    7.28
 -14  23   8   14.58    3.54
 -14  23   8   19.10    4.12
 -23  14   8  101.68    5.88
  23 -14  -8   88.78    5.70
  23 -14  -8  101.25    6.33
  14 -23  -8   12.92    3.35
  14 -23  -8   13.82    3.44
 -15  24   9   45.79    5.54
 -24  15   9  110.10    6.66
  24 -15  -9  102.62    6.54
  24 -15  -9  121.76    6.81
  15 -24  -9   34.87    4.43
  15 -24  -9   56.29    6.33
 -16  25  10   12.91    4.71
 -25  16  10   -3.00    3.96
  25 -16 -10   -2.96    3.44
  25 -16 -10    2.50    4.11
  16 -25 -10   10.81    3.95
  16 -25 -10   12.60    4.66
   6   5 -11   15.26    3.68
   6   5 -11   16.96    4.57
  -5  -6 -11   27.31    4.63
   5   6 -10   37.97    4.08
   5   6 -10   49.91    5.89
  -6  -5 -10   35.45    4.52
   4   7  -9   15.97    3.02
   4   7  -9   14.99    3.62
  -7  -4  -9   52.89    4.58
   7   4   9   63.96    5.79
  -4  -7   9   21.65    3.59
   3   8  -8   15.39    2.60
   3   8  -8   16.73    3.09
  -8  -3  -8  100.45    5.10
   8   3   8  122.85    5.58
  -3  -8   8   21.76    3.16
   2   9  -7   40.32    3.33
[truncated: 518,087 more chars]
